# Supplementary material for: Transcriptome Analysis Highlights Defense and Signaling Pathways Mediated by Rice pi21 Gene with Partial Resistance to Magnaporthe oryzae
Source: Front Plant Sci. 2016 Dec 8;7:1834. doi: 10.3389/fpls.2016.01834 (PMC5143348; doi:10.3389/fpls.2016.01834)
Supplement: Supplementary Table S10 — Detail of all 237 branch pathways in 35 MapMan major pathways. The MapMan functional class, gene ID, RPKM of genes, and ratio of GUY-241-0 h vs. GUY-241-12 h are presented in the table. [file Table10.xlsx]

## Sheet: Sheet1
Supplementary Table S10 Detail of all 237 branch pathways in 35 MapMan major pathways. The MapMan functional class, gene ID, RPKM of genes, and ratio of GUY-241-0 h vs. GUY-241-12 h are presented in the table.
BinCode	BinName	id	type	description	GUY-241-0h vs. GUY-241-12h
1	PS	loc_os08g27010.1	Transcript	moderately similar to ( 296) AT5G38660 | Symbols: APE1 | APE1 (ACCLIMATION OF PHOTOSYNTHESIS TO ENVIRONMENT) | chr5:15473285-15475497 REVERSE protein|APE1, putative, expressed	-3.2584
1.1.1.1	PS.lightreaction.photosystem II.LHC-II	loc_os11g13890.6	Transcript	moderately similar to ( 256) AT4G10340 | Symbols: LHCB5 | LHCB5 (LIGHT HARVESTING COMPLEX OF PHOTOSYSTEM II 5); chlorophyll binding | chr4:6408200-6409496 FORWARDweakly similar to ( 132) CB2_PHYPA Chlorophyll a-b binding protein, chloroplast precursor (LHCII type I CAB) (LHCP) - Physcomitrella patens (Moss)Chloroa_b-bind protein|chlorophyll A-B binding protein, putative, expressed	-7.96181
1.1.1.1	PS.lightreaction.photosystem II.LHC-II	loc_os02g52650.1	Transcript	moderately similar to ( 295) AT1G45474 | Symbols: LHCA5 | LHCA5; pigment binding | chr1:17179353-17180439 FORWARDweakly similar to ( 157) CB12_PETHY Chlorophyll a-b binding protein, chloroplast precursor (LHCI type II CAB) - Petunia hybrida (Petunia)Chloroa_b-bind protein|chlorophyll A-B binding protein, putative, expressed	-6.26628
1.1.1.1	PS.lightreaction.photosystem II.LHC-II	loc_os09g17740.1	Transcript	moderately similar to ( 413) AT2G34430 | Symbols: LHB1B1, LHCB1.4 | LHB1B1; chlorophyll binding | chr2:14524818-14525618 FORWARDmoderately similar to ( 471) CB21_ORYSA Chlorophyll a-b binding protein 1, chloroplast precursor (LHCII type I CAB-1) (LHCP) - Oryza sativa (Rice)Chloroa_b-bind protein|chlorophyll A-B binding protein, putative, expressed	-7.56401
1.1.1.1	PS.lightreaction.photosystem II.LHC-II	loc_os06g21590.1	Transcript	moderately similar to ( 354) AT3G54890 | Symbols: LHCA1 | LHCA1; chlorophyll binding | chr3:20339881-20340922 REVERSEweakly similar to ( 139) CB2B_PINSY Chlorophyll a-b binding protein type 2 member 1B, chloroplast precursor (Chlorophyll a-b binding protein type II 1B) (CAB) (LHCP) - Pinus sylvestris (Scots pine)Chloroa_b-bind protein|chlorophyll A-B binding protein, putative, expressed	-3.18171
1.1.1.1	PS.lightreaction.photosystem II.LHC-II	loc_os11g13890.2	Transcript	moderately similar to ( 246) AT4G10340 | Symbols: LHCB5 | LHCB5 (LIGHT HARVESTING COMPLEX OF PHOTOSYSTEM II 5); chlorophyll binding | chr4:6408200-6409496 FORWARDweakly similar to ( 103) CB2B_PINSY Chlorophyll a-b binding protein type 2 member 1B, chloroplast precursor (Chlorophyll a-b binding protein type II 1B) (CAB) (LHCP) - Pinus sylvestris (Scots pine)Chloroa_b-bind protein|chlorophyll A-B b…	-8.80602
1.1.1.1	PS.lightreaction.photosystem II.LHC-II	loc_os04g38410.1	Transcript	moderately similar to ( 356) AT1G15820 | Symbols: LHCB6, CP24 | LHCB6 (LIGHT HARVESTING COMPLEX PSII SUBUNIT 6); chlorophyll binding | chr1:5446685-5447676 REVERSEmoderately similar to ( 331) CB4_SPIOL Chlorophyll a-b binding protein CP24, chloroplast precursor - Spinacia oleracea (Spinach)Chloroa_b-bind protein|chlorophyll A-B binding protein, putative, expressed	-5.59535
1.1.1.1	PS.lightreaction.photosystem II.LHC-II	loc_os07g37240.1	Transcript	moderately similar to ( 442) AT5G01530 | Symbols: | chlorophyll A-B binding protein CP29 (LHCB4) | chr5:209084-210243 FORWARDmoderately similar to ( 242) CB29_CHLRE Chlorophyll a-b binding protein CP29 - Chlamydomonas reinhardtiiChloroa_b-bind protein|chlorophyll A-B binding protein, putative, expressed	-7.27215
1.1.1.1	PS.lightreaction.photosystem II.LHC-II	loc_os07g37550.1	Transcript	moderately similar to ( 441) AT5G54270 | Symbols: LHCB3, LHCB3*1 | LHCB3 (LIGHT-HARVESTING CHLOROPHYLL B-BINDING PROTEIN 3); structural molecule | chr5:22038424-22039383 FORWARDmoderately similar to ( 464) CB23_HORVU Chlorophyll a-b binding protein of LHCII type III, chloroplast precursor (CAB) - Hordeum vulgare (Barley)Chloroa_b-bind protein|chlorophyll A-B binding protein, putative, expressed	-8.29347
1.1.1.1	PS.lightreaction.photosystem II.LHC-II	loc_os06g21590.2	Transcript	moderately similar to ( 276) AT3G54890 | Symbols: LHCA1 | LHCA1; chlorophyll binding | chr3:20339881-20340922 REVERSEweakly similar to ( 103) CB2B_PINSY Chlorophyll a-b binding protein type 2 member 1B, chloroplast precursor (Chlorophyll a-b binding protein type II 1B) (CAB) (LHCP) - Pinus sylvestris (Scots pine)Chloroa_b-bind protein|chlorophyll A-B binding protein, putative, expressed	-3.50298
1.1.1.1	PS.lightreaction.photosystem II.LHC-II	loc_os08g33820.1	Transcript	moderately similar to ( 373) AT3G47470 | Symbols: LHCA4, CAB4 | LHCA4 (LIGHT-HARVESTING CHLOROPHYLL-PROTEIN COMPLEX I SUBUNIT A4); chlorophyll binding | chr3:17493622-17494773 REVERSEmoderately similar to ( 223) CB12_PETHY Chlorophyll a-b binding protein, chloroplast precursor (LHCI type II CAB) - Petunia hybrida (Petunia)Chloroa_b-bind protein|chlorophyll A-B binding protein, putative, expressed	-5.90102
1.1.1.1	PS.lightreaction.photosystem II.LHC-II	loc_os09g12540.1	Transcript	moderately similar to ( 398) AT1G76570 | Symbols: | chlorophyll A-B binding family protein | chr1:28729132-28730754 FORWARDweakly similar to ( 200) CB25_NICPL Chlorophyll a-b binding protein E, chloroplast precursor (LHCII type I CAB-E) (LHCP) - Nicotiana plumbaginifolia (Leadwort-leaved tobacco)Chloroa_b-bind protein|chlorophyll A-B binding protein, putative, expressed	-4.68418
1.1.1.1	PS.lightreaction.photosystem II.LHC-II	loc_os01g41710.1	Transcript	moderately similar to ( 424) AT2G34430 | Symbols: LHB1B1, LHCB1.4 | LHB1B1; chlorophyll binding | chr2:14524818-14525618 FORWARDmoderately similar to ( 466) CB22_ORYSA Chlorophyll a-b binding protein 2, chloroplast precursor (LHCII type I CAB-2) (LHCP) - Oryza sativa (Rice)Chloroa_b-bind protein|chlorophyll A-B binding protein, putative, expressed	-6.34278
1.1.1.1	PS.lightreaction.photosystem II.LHC-II	loc_os07g38960.1	Transcript	moderately similar to ( 352) AT3G61470 | Symbols: LHCA2 | LHCA2; chlorophyll binding | chr3:22745736-22747032 FORWARDmoderately similar to ( 360) CB12_PETHY Chlorophyll a-b binding protein, chloroplast precursor (LHCI type II CAB) - Petunia hybrida (Petunia)Chloroa_b-bind protein|chlorophyll A-B binding protein, putative, expressed	-2.51773
1.1.1.1	PS.lightreaction.photosystem II.LHC-II	loc_os03g39610.1	Transcript	moderately similar to ( 459) AT3G27690 | Symbols: LHCB2.4, LHCB2.3, LHCB2 | LHCB2.3; chlorophyll binding | chr3:10256002-10256921 FORWARDhighly similar to ( 526) CB23_ORYSA Chlorophyll a-b binding protein, chloroplast precursor (LHCII type I CAB) (LHCP) - Oryza sativa (Rice)Chloroa_b-bind protein|chlorophyll A-B binding protein, putative, expressed	-7.02507
1.1.1.2	PS.lightreaction.photosystem II.PSII polypeptide subunits	loc_os01g64960.1	Transcript	moderately similar to ( 256) AT1G44575 | Symbols: NPQ4, PSBS | NPQ4 (NONPHOTOCHEMICAL QUENCHING); chlorophyll binding / xanthophyll binding | chr1:16871768-16872548 FORWARDmoderately similar to ( 269) PSBS_TOBAC Photosystem II 22 kDa protein, chloroplast precursor (CP22) - Nicotiana tabacum (Common tobacco) protein|chlorophyll A-B binding protein, putative, expressed	-8.39383
1.1.1.2	PS.lightreaction.photosystem II.PSII polypeptide subunits	loc_os07g04840.1	Transcript	moderately similar to ( 280) AT1G06680 | Symbols: PSBP-1, OEE2, PSII-P | PSBP-1 (PHOTOSYSTEM II SUBUNIT P-1); poly(U) binding | chr1:2048076-2049186 FORWARDmoderately similar to ( 326) PSBP_WHEAT Oxygen-evolving enhancer protein 2, chloroplast precursor (OEE2) (23 kDa subunit of oxygen evolving system of photosystem II) (OEC 23 kDa subunit) (23 kDa thylakoid membrane protein) - Triticum aestivum …	-1.21158
1.1.1.2	PS.lightreaction.photosystem II.PSII polypeptide subunits	loc_os01g43070.1	Transcript	moderately similar to ( 277) AT5G11450 | Symbols: | oxygen-evolving complex-related | chr5:3654475-3656357 FORWARD protein|psbP-related thylakoid lumenal protein 4, chloroplast precursor, putative, expressed	2.22982
1.1.1.2	PS.lightreaction.photosystem II.PSII polypeptide subunits	loc_os07g01480.2	Transcript	weakly similar to ( 162) AT3G01440 | Symbols: | oxygen evolving enhancer 3 (PsbQ) family protein | chr3:168478-169407 FORWARDPsbQ protein|oxygen evolving enhancer protein 3 domain containing protein, expressed	2.87399
1.1.1.2	PS.lightreaction.photosystem II.PSII polypeptide subunits	loc_os03g21560.1	Transcript	weakly similar to ( 154) AT1G03600 | Symbols: | photosystem II family protein | chr1:898916-899440 FORWARD protein|photosystem II 11 kD protein, putative, expressed	-2.37271
1.1.1.2	PS.lightreaction.photosystem II.PSII polypeptide subunits	loc_os12g08830.1	Transcript	moderately similar to ( 306) AT1G77090 | Symbols: | thylakoid lumenal 29.8 kDa protein | chr1:28960576-28961875 REVERSE protein|thylakoid lumenal 29.8 kDa protein, putative, expressed	-8.17072
1.1.1.2	PS.lightreaction.photosystem II.PSII polypeptide subunits	loc_os02g36850.1	Transcript	weakly similar to ( 162) AT1G14150 | Symbols: | oxygen evolving enhancer 3 (PsbQ) family protein | chr1:4839885-4840632 FORWARDPsbQ protein|oxygen evolving enhancer protein 3, identical, putative, expressed	2.21251
1.1.1.2	PS.lightreaction.photosystem II.PSII polypeptide subunits	loc_os01g31690.1	Transcript	moderately similar to ( 454) AT3G50820 | Symbols: PSBO2, PSBO-2, OEC33 | PSBO2 (PHOTOSYSTEM II SUBUNIT O-2); oxygen evolving/ poly(U) binding | chr3:18891008-18892311 REVERSEmoderately similar to ( 482) PSBO_TOBAC Oxygen-evolving enhancer protein 1, chloroplast precursor (OEE1) (33 kDa subunit of oxygen evolving system of photosystem II) (OEC 33 kDa subunit) (33 kDa thylakoid membrane protein) - …	-2.26443
1.1.1.2	PS.lightreaction.photosystem II.PSII polypeptide subunits	loc_os01g71190.1	Transcript	weakly similar to ( 191) AT4G28660 | Symbols: PSB28 | PSB28 (PHOTOSYSTEM II REACTION CENTER PSB28 PROTEIN) | chr4:14150008-14150933 FORWARDpsbW Psb28 protein|photosystem II reaction center PSB28 protein, chloroplast precursor, putative, expressed	-6.14225
1.1.1.2	PS.lightreaction.photosystem II.PSII polypeptide subunits	loc_os04g59440.1	Transcript	moderately similar to ( 226) AT1G44575 | Symbols: NPQ4, PSBS | NPQ4 (NONPHOTOCHEMICAL QUENCHING); chlorophyll binding / xanthophyll binding | chr1:16871768-16872548 FORWARDmoderately similar to ( 229) PSBS_SPIOL Photosystem II 22 kDa protein, chloroplast precursor (CP22) - Spinacia oleracea (Spinach) protein|chlorophyll A-B binding protein, putative, expressed	-6.18252
1.1.1.2	PS.lightreaction.photosystem II.PSII polypeptide subunits	loc_os01g70820.1	Transcript	moderately similar to ( 281) AT3G05410 | Symbols: | calcium ion binding | chr3:1554783-1561456 FORWARD protein|lumenal PsbP, putative, expressed	-7.98632
1.1.1.2	PS.lightreaction.photosystem II.PSII polypeptide subunits	loc_os04g44200.1	Transcript	weakly similar to ( 104) AT2G01918 | Symbols: | calcium ion binding | chr2:424254-425678 REVERSE protein|oxygen-evolving enhancer protein 3, chloroplast precursor, putative, expressed	1.51142
1.1.1.2	PS.lightreaction.photosystem II.PSII polypeptide subunits	loc_os05g22730.1	Transcript	weakly similar to ( 118) AT5G02120 | Symbols: OHP | OHP (ONE HELIX PROTEIN) | chr5:419144-419633 FORWARD protein|expressed protein	-3.33884
1.1.1.2	PS.lightreaction.photosystem II.PSII polypeptide subunits	loc_os07g05365.1	Transcript	weakly similar to ( 142) AT1G79040 | Symbols: PSBR | PSBR (photosystem II subunit R) | chr1:29736085-29736781 FORWARDweakly similar to ( 185) PSBR_HORVU Photosystem II 10 kDa polypeptide, chloroplast precursor - Hordeum vulgare (Barley)PsbR protein|photosystem II 10 kDa polypeptide, chloroplast precursor, putative, expressed	5.30938
1.1.2	PS.lightreaction.photosystem I	loc_os04g53612.1	Transcript	moderately similar to ( 346) AT3G21740 | Symbols: APO4 | APO4 (ACCUMULATION OF PHOTOSYSTEM ONE 4) | chr3:7662542-7663638 REVERSEDUF794 protein|APO, putative, expressed	2.48191
1.1.2.1	PS.lightreaction.photosystem I.LHC-I	loc_os01g40710.1	Transcript	weakly similar to ( 134) AT1G34000 | Symbols: OHP2 | OHP2 (ONE-HELIX PROTEIN 2) | chr1:12358151-12358902 REVERSE protein|high light inducible protein, putative, expressed	-2.44538
1.1.2.2	PS.lightreaction.photosystem I.PSI polypeptide subunits	loc_os03g56670.1	Transcript	moderately similar to ( 253) AT1G31330 | Symbols: PSAF | PSAF (photosystem I subunit F) | chr1:11215011-11215939 REVERSEmoderately similar to ( 284) PSAF_HORVU Photosystem I reaction center subunit III, chloroplast precursor (Light-harvesting complex I 17 kDa protein) (PSI-F) - Hordeum vulgare (Barley)PSI_PsaF psaF protein|photosystem I reaction center subunit III, chloroplast precursor, putative…	-4.00048
1.1.2.2	PS.lightreaction.photosystem I.PSI polypeptide subunits	loc_os03g56670.2	Transcript	moderately similar to ( 253) AT1G31330 | Symbols: PSAF | PSAF (photosystem I subunit F) | chr1:11215011-11215939 REVERSEmoderately similar to ( 284) PSAF_HORVU Photosystem I reaction center subunit III, chloroplast precursor (Light-harvesting complex I 17 kDa protein) (PSI-F) - Hordeum vulgare (Barley)PSI_PsaF psaF protein|photosystem I reaction center subunit III, chloroplast precursor, putative…	-3.55507
1.1.2.2	PS.lightreaction.photosystem I.PSI polypeptide subunits	loc_os08g44680.1	Transcript	moderately similar to ( 260) AT4G02770 | Symbols: PSAD-1 | PSAD-1 (photosystem I subunit D-1) | chr4:1229247-1229873 REVERSEmoderately similar to ( 296) PSAD_HORVU Photosystem I reaction center subunit II, chloroplast precursor (Photosystem I 20 kDa subunit) (PSI-D) - Hordeum vulgare (Barley)PsaD psaD protein|photosystem I reaction center subunit II, chloroplast precursor, putative, expressed	-2.97817
1.1.2.2	PS.lightreaction.photosystem I.PSI polypeptide subunits	loc_os04g33830.1	Transcript	weakly similar to ( 165) AT1G08380 | Symbols: PSAO | PSAO (photosystem I subunit O) | chr1:2641004-2641739 REVERSE protein|membrane protein, putative, expressed	-3.93769
1.1.2.2	PS.lightreaction.photosystem I.PSI polypeptide subunits	loc_os07g05480.1	Transcript	weakly similar to ( 147) AT1G30380 | Symbols: PSAK | PSAK (photosystem I subunit K) | chr1:10722325-10723013 FORWARDmoderately similar to ( 213) PSAK_HORVU Photosystem I reaction center subunit psaK, chloroplast precursor (Photosystem I subunit X) (PSI-K) (Light-harvesting complex I 7 kDa protein) - Hordeum vulgare (Barley)PSI_PSAK protein|photosystem I reaction center subunit, chloroplast precur…	-4.34187
1.1.2.2	PS.lightreaction.photosystem I.PSI polypeptide subunits	loc_os05g48630.2	Transcript	weakly similar to ( 144) AT1G52230 | Symbols: PSAH2, PSAH-2, PSI-H | PSAH2 (PHOTOSYSTEM I SUBUNIT H2) | chr1:19454902-19455508 FORWARDweakly similar to ( 193) PSAH_ORYSA Photosystem I reaction center subunit VI, chloroplast precursor (PSI-H) (Light-harvesting complex I 11 kDa protein) (Protein GOS5) - Oryza sativa (Rice)PSI_PsaH protein|expressed protein	-2.50471
1.1.2.2	PS.lightreaction.photosystem I.PSI polypeptide subunits	loc_os12g08770.1	Transcript	weakly similar to ( 156) AT5G64040 | Symbols: PSAN | PSAN; calmodulin binding | chr5:25628690-25629409 REVERSEweakly similar to ( 166) PSAN_HORVU Photosystem I reaction center subunit N, chloroplast precursor (PSI-N) - Hordeum vulgare (Barley)PsaN protein|photosystem I reaction center subunit N, chloroplast precursor, putative, expressed	-5.30012
1.1.2.2	PS.lightreaction.photosystem I.PSI polypeptide subunits	loc_os07g25430.1	Transcript	weakly similar to ( 105) AT2G20260 | Symbols: PSAE-2 | PSAE-2 (photosystem I subunit E-2); catalytic | chr2:8736780-8737644 FORWARDweakly similar to ( 120) PSAE_HORVU Photosystem I reaction center subunit IV, chloroplast precursor (PSI-E) (Photosystem I 10.8 kDa polypeptide) - Hordeum vulgare (Barley)PSI_PsaE psaE protein|photosystem I reaction center subunit IV A, chloroplast precursor, putative…	-1.76758
1.1.3.1	PS.lightreaction.cytochrome b6/f.iron sulfur subunit	loc_os07g37030.1	Transcript	moderately similar to ( 285) AT4G03280 | Symbols: PETC, PGR1 | PETC (PHOTOSYNTHETIC ELECTRON TRANSFER C); electron transporter, transferring electrons from cytochrome b6/f complex of photosystem II | chr4:1440462-1441717 FORWARDmoderately similar to ( 453) UCRIA_ORYSA Cytochrome b6-f complex iron-sulfur subunit, chloroplast precursor (EC 1.10.99.1) (Rieske iron-sulfur protein) (Plastohydroquinone…	-1.31045
1.1.4	PS.lightreaction.ATP synthase	loc_os01g48300.2	Transcript	moderately similar to ( 359) AT2G31040 | Symbols: | ATP synthase protein I -related | chr2:13209094-13211012 REVERSE protein|ATP synthase protein I related, putative, expressed	2.54701
1.1.4.4	PS.lightreaction.ATP synthase.gamma chain	loc_os07g32880.1	Transcript	moderately similar to ( 461) AT4G04640 | Symbols: ATPC1 | ATPC1; enzyme regulator | chr4:2350761-2351882 REVERSEhighly similar to ( 540) ATPG_MAIZE ATP synthase subunit gamma, chloroplast precursor (EC 3.6.3.14) [Contains: Inceptin] - Zea mays (Maize) ATP-synt PRK05621 AtpG protein|ATP synthase gamma chain, putative, expressed	-2.90717
1.1.4.7	PS.lightreaction.ATP synthase.delta chain	loc_os02g51470.3	Transcript	weakly similar to ( 164) AT4G09650 | Symbols: ATPD | ATPD (ATP SYNTHASE DELTA-SUBUNIT GENE); hydrogen ion transporting ATP synthase, rotational mechanism / proton-transporting ATPase, rotational mechanism | chr4:6100799-6101503 FORWARDmoderately similar to ( 237) ATPD_SORBI ATP synthase delta chain, chloroplast precursor (EC 3.6.3.14) - Sorghum bicolor (Sorghum) (Sorghum vulgare) OSCP AtpH PRK057…	-1.61379
1.1.4.7	PS.lightreaction.ATP synthase.delta chain	loc_os02g51470.2	Transcript	weakly similar to ( 164) AT4G09650 | Symbols: ATPD | ATPD (ATP SYNTHASE DELTA-SUBUNIT GENE); hydrogen ion transporting ATP synthase, rotational mechanism / proton-transporting ATPase, rotational mechanism | chr4:6100799-6101503 FORWARDmoderately similar to ( 237) ATPD_SORBI ATP synthase delta chain, chloroplast precursor (EC 3.6.3.14) - Sorghum bicolor (Sorghum) (Sorghum vulgare) OSCP AtpH PRK057…	-4.05937
1.1.4.9	PS.lightreaction.ATP synthase.subunit B_ (ATPX)	loc_os03g17070.1	Transcript	weakly similar to ( 120) AT4G32260 | Symbols: | ATP synthase family | chr4:15573859-15574586 REVERSEweakly similar to ( 129) ATPX_SPIOL ATP synthase B' chain, chloroplast precursor (EC 3.6.3.14) (Subunit II) - Spinacia oleracea (Spinach)atpG protein|ATP synthase B chain, chloroplast precursor, putative, expressed	-1.92889
1.1.5.1	PS.lightreaction.other electron carrier (ox/red).plastocyanin	loc_os06g01210.1	Transcript	weakly similar to ( 130) AT1G20340 | Symbols: DRT112, PETE2 | DRT112; copper ion binding / electron carrier | chr1:7042770-7043273 REVERSEmoderately similar to ( 226) PLAS_ORYSA Plastocyanin, chloroplast precursor - Oryza sativa (Rice)Copper-bind PRK02710 PetE protein|plastocyanin, chloroplast precursor, putative, expressed	-3.87488
1.1.5.2	PS.lightreaction.other electron carrier (ox/red).ferredoxin	loc_os08g35710.1	Transcript	weakly similar to ( 131) AT1G02180 | Symbols: | ferredoxin-related | chr1:413619-414505 REVERSE protein|expressed protein	-9.12448
1.1.5.2	PS.lightreaction.other electron carrier (ox/red).ferredoxin	loc_os08g01380.1	Transcript	weakly similar to ( 110) AT1G60950 | Symbols: FED A, ATFD2 | FED A; 2 iron, 2 sulfur cluster binding / electron carrier/ iron-sulfur cluster binding | chr1:22444565-22445011 FORWARDmoderately similar to ( 207) FER1_ORYSA Ferredoxin-1, chloroplast precursor (Ferredoxin I) (Anti-disease protein 1) - Oryza sativa (Rice)petF fer2 PRK07609 Fer2 protein|2Fe-2S iron-sulfur cluster binding domain contain…	-5.70308
1.1.5.2	PS.lightreaction.other electron carrier (ox/red).ferredoxin	loc_os05g48160.3	Transcript	weakly similar to ( 179) AT4G32590 | Symbols: | ferredoxin-related | chr4:15721417-15722781 FORWARD protein|2Fe-2S iron-sulfur cluster binding domain containing protein, expressed	-5.3928
1.1.5.2	PS.lightreaction.other electron carrier (ox/red).ferredoxin	loc_os03g11450.1	Transcript	weakly similar to ( 166) AT5G07950 | Symbols: | unknown protein | chr5:2540530-2542047 REVERSE protein|expressed protein	3.95372
1.1.5.2	PS.lightreaction.other electron carrier (ox/red).ferredoxin	loc_os07g30670.1	Transcript	weakly similar to ( 160) AT3G16250 | Symbols: NDF4 | NDF4 (NDH-DEPENDENT CYCLIC ELECTRON FLOW 1); electron carrier/ iron-sulfur cluster binding | chr3:5507091-5508320 REVERSE protein|2Fe-2S iron-sulfur cluster binding domain containing protein, expressed	7.90614
1.1.5.2	PS.lightreaction.other electron carrier (ox/red).ferredoxin	loc_os03g61960.1	Transcript	weakly similar to ( 150) AT2G27510 | Symbols: ATFD3 | ATFD3 (ferredoxin 3); 2 iron, 2 sulfur cluster binding / electron carrier/ iron-sulfur cluster binding | chr2:11758281-11758748 REVERSEmoderately similar to ( 211) FER3_MAIZE Ferredoxin-3, chloroplast precursor (Ferredoxin III) (Fd III) - Zea mays (Maize)petF fer2 Fdx Fer2 PRK07609 protein|2Fe-2S iron-sulfur cluster binding domain containing p…	1.12054
1.1.5.3	PS.lightreaction.other electron carrier (ox/red).ferredoxin reductase	loc_os02g01340.2	Transcript	highly similar to ( 540) AT5G66190 | Symbols: ATLFNR1 | FNR1 (FERREDOXIN-NADP(+)-OXIDOREDUCTASE 1); NADPH dehydrogenase/ electron transporter, transferring electrons within the cyclic electron transport pathway of photosynthesis/ electron transporter, transferring electrons within the noncyclic electron transp | chr5:26451203-26452616 REVERSEhighly similar to ( 559) FENR1_ORYSA Ferredoxin--NADP r…	-3.82248
1.1.5.3	PS.lightreaction.other electron carrier (ox/red).ferredoxin reductase	loc_os06g01850.1	Transcript	highly similar to ( 551) AT1G20020 | Symbols: ATLFNR2 | FNR2 (FERREDOXIN-NADP(+)-OXIDOREDUCTASE 2); NADPH dehydrogenase/ oxidoreductase/ poly(U) binding | chr1:6942851-6944868 FORWARDhighly similar to ( 656) FENR1_ORYSA Ferredoxin--NADP reductase, leaf isozyme, chloroplast precursor (EC 1.18.1.2) (FNR) - Oryza sativa (Rice) CysJ NAD_binding_1 PRK06214 cysJ protein|ferredoxin--NADP reductase, chlo…	-2.78647
1.1.6	PS.lightreaction.NADH DH	loc_os01g20110.1	Transcript	moderately similar to ( 419) AT4G37920 | Symbols: | unknown protein | chr4:17828538-17830317 REVERSE protein|expressed protein	3.64977
1.1.6	PS.lightreaction.NADH DH	loc_os02g18940.1	Transcript	weakly similar to ( 146) AT1G36320 | Symbols: | unknown protein | chr1:13671876-13673939 FORWARD protein|expressed protein	2.79703
1.1.6	PS.lightreaction.NADH DH	loc_os04g45600.1	Transcript	moderately similar to ( 211) AT4G37925 | Symbols: NDH-M | NDH-M (subunit NDH-M of NAD(P)H:plastoquinone dehydrogenase complex) | chr4:17830748-17831485 REVERSE protein|NDH-M H PLASTOQUINONE DEHY, putative, expressed	-2.34255
1.1.6	PS.lightreaction.NADH DH	loc_os01g72950.1	Transcript	weakly similar to ( 157) AT1G74880 | Symbols: NDH-O | NDH-O (NAD(P)H:plastoquinone dehydrogenase complex subunit O) | chr1:28130112-28131020 REVERSE protein|expressed protein	-2.66523
1.1.30	PS.lightreaction.state transition	loc_os05g40180.1	Transcript	highly similar to ( 560) AT5G01920 | Symbols: STN8 | STN8; kinase/ protein kinase | chr5:359154-360867 FORWARDmoderately similar to ( 248) STT7_CHLRE Serine/threonine-protein kinase stt7, chloroplast precursor (EC 2.7.11.1) - Chlamydomonas reinhardtii S_TKc Pkinase S_TKc SPS1 protein|serine/threonine-protein kinase stt7, chloroplast precursor, putative, expressed	-4.20777
1.1.40	PS.lightreaction.cyclic electron flow-chlororespiration	loc_os03g63010.1	Transcript	very weakly similar to (95.1) AT4G22260 | Symbols: IM, IM1 | IM (IMMUTANS); alternative oxidase | chr4:11769967-11772350 REVERSE protein|plastid terminal oxidase, putative, expressed	3.08698
1.1.40	PS.lightreaction.cyclic electron flow-chlororespiration	loc_os10g21396.1	Transcript	moderately similar to ( 430) ATCG01100 | Symbols: NDHA | NADH dehydrogenase ND1 | chrC:119847-122009 REVERSEhighly similar to ( 542) NU1C_ORYSA NAD(P)H-quinone oxidoreductase subunit 1, chloroplast (EC 1.6.5.-) (NAD(P)H dehydrogenase subunit 1) (NDH subunit 1) (NADH-plastoquinone oxidoreductase subunit 1) - Oryza sativa (Rice) ndhA PRK06076 NADHdh NuoH HyfC protein|NADPH-dependent oxidoreductase,…	1.72037
1.1.40	PS.lightreaction.cyclic electron flow-chlororespiration	loc_os08g45190.1	Transcript	weakly similar to ( 124) AT2G05620 | Symbols: PGR5 | PGR5 (proton gradient regulation 5); electron carrier | chr2:2081204-2081687 REVERSE protein|PGR5, putative, expressed	-6.21981
1.1.40	PS.lightreaction.cyclic electron flow-chlororespiration	loc_os10g21418.1	Transcript	highly similar to ( 800) ATCG01010 | Symbols: NDHF | Chloroplast encoded NADH dehydrogenase unit. | chrC:110398-112638 REVERSEnearly identical (1224) NU5C_ORYSA NAD(P)H-quinone oxidoreductase chain 5, chloroplast (EC 1.6.5.-) (NAD(P)H dehydrogenase, chain 5) (NADH-plastoquinone oxidoreductase chain 5) - Oryza sativa (Rice) ndhF PRK07376 PRK06590 NuoL Oxidored_q1_C PRK07390 PRK12648 PRK12647 PRK12…	4.34432
1.1.40	PS.lightreaction.cyclic electron flow-chlororespiration	loc_os04g16732.1	Transcript	highly similar to ( 716) ATCG01110 | Symbols: NDHH | Encodes the 49KDa plastid NAD(P)H dehydrogenase subunit H protein. Its transcription is regulated by an ndhF-specific plastid sigma factor, SIG4. | chrC:122011-123192 REVERSEhighly similar to ( 806) NDHH_ORYSA NAD(P)H-quinone oxidoreductase chain H, chloroplast (EC 1.6.5.-) (NAD(P)H dehydrogenase, chain H) (NADH-plastoquinone oxidoreductase 49 …	3.62211
1.1.40	PS.lightreaction.cyclic electron flow-chlororespiration	loc_os03g38950.1	Transcript	moderately similar to ( 303) AT3G15840 | Symbols: PIFI | PIFI (post-illumination chlorophyll fluorescence increase) | chr3:5356782-5358070 REVERSE protein|chloroplast post-illumination chlorophyll fluorescence increase protein, putative, expressed	4.13566
1.1.40	PS.lightreaction.cyclic electron flow-chlororespiration	loc_os03g64020.2	Transcript	moderately similar to ( 402) AT4G22890 | Symbols: PGR5-LIKE A | PGR5-LIKE A | chr4:12007157-12009175 FORWARD protein|expressed protein	-2.33676
1.2.2	PS.photorespiration.glycolate oxydase	loc_os08g09860.1	Transcript	weakly similar to ( 146) AT3G14420 | Symbols: | (S)-2-hydroxy-acid oxidase, peroxisomal, putative / glycolate oxidase, putative / short chain alpha-hydroxy acid oxidase, putative | chr3:4821899-4823899 FORWARDweakly similar to ( 138) GOX_SPIOL Peroxisomal (S)-2-hydroxy-acid oxidase (EC 1.1.3.15) (Glycolate oxidase) (GOX) (Short chain alpha-hydroxy acid oxidase) - Spinacia oleracea (Spinach) FMN_d…	2.18593
1.2.3	PS.photorespiration.aminotransferases peroxisomal	loc_os08g39300.4	Transcript	highly similar to ( 689) AT2G13360 | Symbols: AGT, AGT1 | AGT (ALANINE:GLYOXYLATE AMINOTRANSFERASE); alanine-glyoxylate transaminase/ serine-glyoxylate transaminase/ serine-pyruvate transaminase | chr2:5539417-5540902 REVERSEweakly similar to ( 105) SGAT_MAIZE Serine--glyoxylate aminotransferase (EC 2.6.1.45) (SGAT) (Alanine--glyoxylate aminotransferase) (EC 2.6.1.44) (AGT) (Fragments) - Zea mays…	4.13702
1.2.3	PS.photorespiration.aminotransferases peroxisomal	loc_os08g39300.3	Transcript	moderately similar to ( 259) AT2G13360 | Symbols: AGT, AGT1 | AGT (ALANINE:GLYOXYLATE AMINOTRANSFERASE); alanine-glyoxylate transaminase/ serine-glyoxylate transaminase/ serine-pyruvate transaminase | chr2:5539417-5540902 REVERSE COG0075 protein|aminotransferase, putative, expressed	3.45895
1.2.4.4	PS.photorespiration.glycine cleavage.H protein	loc_os10g37180.1	Transcript	moderately similar to ( 217) AT1G32470 | Symbols: | glycine cleavage system H protein, mitochondrial, putative | chr1:11739479-11740246 REVERSEmoderately similar to ( 302) GCSH_ORYSA Glycine cleavage system H protein, mitochondrial precursor - Oryza sativa (Rice) PRK01202 GCV_H GcvH protein|glycine cleavage system H protein, putative, expressed	-4.95487
1.2.6	PS.photorespiration.hydroxypyruvate reductase	loc_os01g12830.1	Transcript	moderately similar to ( 339) AT1G79870 | Symbols: | oxidoreductase family protein | chr1:30044794-30045851 FORWARDvery weakly similar to (95.1) DHGY_CUCSA Glycerate dehydrogenase (EC 1.1.1.29) (NADH-dependent hydroxypyruvate reductase) (HPR) (GDH) - Cucumis sativus (Cucumber) LdhA 2-Hacid_dh SerA 2-Hacid_dh_C PRK08410 PRK11790 PRK06487 PRK06932 PRK07574 PRK08605 PRK06436 PRK12480 protein|erythron…	-2.16565
1.2.6	PS.photorespiration.hydroxypyruvate reductase	loc_os04g01600.1	Transcript	moderately similar to ( 252) AT2G45630 | Symbols: | oxidoreductase family protein | chr2:18796000-18797089 FORWARD LdhA 2-Hacid_dh SerA 2-Hacid_dh_C PRK08410 PRK06487 PRK07574 PRK06932 PRK11790 PRK12480 PRK08605 PRK06436 PRK00257 protein|erythronate-4-phosphate dehydrogenase domain containing protein, expressed	3.60438
1.3.2	PS.calvin cycle.rubisco small subunit	loc_os12g17600.1	Transcript	moderately similar to ( 218) AT1G67090 | Symbols: RBCS1A | RBCS1A (RIBULOSE BISPHOSPHATE CARBOXYLASE SMALL CHAIN 1A); copper ion binding / ribulose-bisphosphate carboxylase | chr1:25048590-25049249 REVERSEmoderately similar to ( 325) RBS1_ORYSA Ribulose bisphosphate carboxylase small chain, chloroplast precursor (EC 4.1.1.39) (RuBisCO small subunit) (Ribulose bisphosphate carboxylase small chain …	-4.40058
1.3.2	PS.calvin cycle.rubisco small subunit	loc_os12g19381.1	Transcript	moderately similar to ( 238) AT1G67090 | Symbols: RBCS1A | RBCS1A (RIBULOSE BISPHOSPHATE CARBOXYLASE SMALL CHAIN 1A); copper ion binding / ribulose-bisphosphate carboxylase | chr1:25048590-25049249 REVERSEmoderately similar to ( 364) RBS2_ORYSA Ribulose bisphosphate carboxylase small chain A, chloroplast precursor (EC 4.1.1.39) (RuBisCO small subunit A) - Oryza sativa (Rice)RuBisCO_small RuBisCO_…	-2.95786
1.3.2	PS.calvin cycle.rubisco small subunit	loc_os12g19470.2	Transcript	moderately similar to ( 218) AT1G67090 | Symbols: RBCS1A | RBCS1A (RIBULOSE BISPHOSPHATE CARBOXYLASE SMALL CHAIN 1A); copper ion binding / ribulose-bisphosphate carboxylase | chr1:25048590-25049249 REVERSEmoderately similar to ( 318) RBS1_ORYSA Ribulose bisphosphate carboxylase small chain, chloroplast precursor (EC 4.1.1.39) (RuBisCO small subunit) (Ribulose bisphosphate carboxylase small chain …	-4.59858
1.3.3	PS.calvin cycle.phosphoglycerate kinase	loc_os05g41640.1	Transcript	highly similar to ( 676) AT1G56190 | Symbols: | phosphoglycerate kinase, putative | chr1:21028622-21030454 FORWARDhighly similar to ( 701) PGKH_WHEAT Phosphoglycerate kinase, chloroplast precursor (EC 2.7.2.3) - Triticum aestivum (Wheat) pgk Phosphoglycerate_kinase PGK Pgk protein|phosphoglycerate kinase protein, putative, expressed	-6.74724
1.3.3	PS.calvin cycle.phosphoglycerate kinase	loc_os05g41640.2	Transcript	highly similar to ( 676) AT1G56190 | Symbols: | phosphoglycerate kinase, putative | chr1:21028622-21030454 FORWARDhighly similar to ( 701) PGKH_WHEAT Phosphoglycerate kinase, chloroplast precursor (EC 2.7.2.3) - Triticum aestivum (Wheat) pgk Phosphoglycerate_kinase PGK Pgk protein|phosphoglycerate kinase protein, putative, expressed	-4.26866
1.3.4	PS.calvin cycle.GAP	loc_os03g03720.1	Transcript	highly similar to ( 678) AT1G42970 | Symbols: GAPB | GAPB (GLYCERALDEHYDE-3-PHOSPHATE DEHYDROGENASE B SUBUNIT); glyceraldehyde-3-phosphate dehydrogenase (NADP+)/ glyceraldehyde-3-phosphate dehydrogenase | chr1:16127552-16129584 FORWARDhighly similar to ( 667) G3PB_SPIOL Glyceraldehyde-3-phosphate dehydrogenase B, chloroplast precursor (EC 1.2.1.13) (NADP-dependent glyceraldehydephosphate dehydrog…	-3.33508
1.3.4	PS.calvin cycle.GAP	loc_os08g34210.1	Transcript	highly similar to ( 883) AT2G24270 | Symbols: ALDH11A3 | ALDH11A3; 3-chloroallyl aldehyde dehydrogenase/ glyceraldehyde-3-phosphate dehydrogenase (NADP+) | chr2:10327325-10329601 REVERSEhighly similar to ( 939) GAPN_MAIZE NADP-dependent glyceraldehyde-3-phosphate dehydrogenase (EC 1.2.1.9) (Non-phosphorylating glyceraldehyde 3-phosphate dehydrogenase) (Glyceraldehyde-3-phosphate dehydrogenase [NA…	-3.59633
1.3.5	PS.calvin cycle.TPI	loc_os09g36450.1	Transcript	moderately similar to ( 422) AT2G21170 | Symbols: TIM | TIM (TRIOSEPHOSPHATE ISOMERASE); catalytic/ triose-phosphate isomerase | chr2:9071047-9073106 REVERSEmoderately similar to ( 471) TPIC_SECCE Triosephosphate isomerase, chloroplast precursor (EC 5.3.1.1) (TIM) (Triose-phosphate isomerase) - Secale cereale (Rye) TIM TIM tpiA TpiA protein|triosephosphate isomerase, chloroplast precursor, putati…	-5.27101
1.3.6	PS.calvin cycle.aldolase	loc_os05g33380.1	Transcript	highly similar to ( 589) AT2G36460 | Symbols: | fructose-bisphosphate aldolase, putative | chr2:15296929-15297732 REVERSEhighly similar to ( 711) ALF_ORYSA Fructose-bisphosphate aldolase cytoplasmic isozyme (EC 4.1.2.13) (Gravity-specific protein GSC 233) - Oryza sativa (Rice) Glycolytic FBP_aldolase_I_a COG3588 FBP_aldolase_I protein|fructose-bisphospate aldolase isozyme, putative, expressed	1.15032
1.3.7	PS.calvin cycle.FBPase	loc_os03g16050.1	Transcript	highly similar to ( 602) AT3G54050 | Symbols: | fructose-1,6-bisphosphatase, putative / D-fructose-1,6-bisphosphate 1-phosphohydrolase, putative / FBPase, putative | chr3:20016951-20018527 FORWARDhighly similar to ( 729) F16P1_ORYSA Fructose-1,6-bisphosphatase, chloroplast precursor (EC 3.1.3.11) (D-fructose-1,6-bisphosphate 1-phosphohydrolase) (FBPase) - Oryza sativa (Rice) FBPase PRK09293 Fbp F…	-4.11797
1.3.8	PS.calvin cycle.transketolase	loc_os06g04270.1	Transcript	nearly identical (1211) AT2G45290 | Symbols: | transketolase, putative | chr2:18672737-18675589 FORWARDnearly identical (1292) TKTC_MAIZE Transketolase, chloroplast (EC 2.2.1.1) (TK) - Zea mays (Maize) TktA PRK05899 PRK12753 PRK12754 Transketolase_N TPP_TK COG3959 Transket_pyr COG3958 protein|transketolase, chloroplast precursor, putative, expressed	-3.22705
1.3.9	PS.calvin cycle.seduheptulose bisphosphatase	loc_os04g16680.1	Transcript	highly similar to ( 585) AT3G55800 | Symbols: SBPASE | SBPASE (sedoheptulose-bisphosphatase); phosphoric ester hydrolase/ sedoheptulose-bisphosphatase | chr3:20709640-20711421 FORWARDhighly similar to ( 726) S17P_WHEAT Sedoheptulose-1,7-bisphosphatase, chloroplast precursor (EC 3.1.3.37) (Sedoheptulose-bisphosphatase) (SBPase) (SED(1,7)P2ase) - Triticum aestivum (Wheat) FBPase FBPase PRK09293 Fbp…	-5.12641
1.3.11	PS.calvin cycle.RPE	loc_os09g32810.2	Transcript	moderately similar to ( 315) AT3G01850 | Symbols: | ribulose-phosphate 3-epimerase, cytosolic, putative / pentose-5-phosphate 3-epimerase, putative | chr3:300428-301987 REVERSEmoderately similar to ( 375) RPE1_ORYSA Ribulose-phosphate 3-epimerase, cytoplasmic isoform (EC 5.1.3.1) (Ribulose-5-phosphate-epimerase) (Cyt-RPEase) (RPEcyt) (Pentose-5-phosphate 3-epimerase) (PPE) - Oryza sativa (Rice) R…	1.42076
1.3.11	PS.calvin cycle.RPE	loc_os03g07300.1	Transcript	moderately similar to ( 404) AT5G61410 | Symbols: RPE | RPE; catalytic/ ribulose-phosphate 3-epimerase | chr5:24684085-24685836 REVERSEmoderately similar to ( 464) RPE_ORYSA Ribulose-phosphate 3-epimerase, chloroplast precursor (EC 5.1.3.1) (Pentose-5-phosphate 3-epimerase) (PPE) (RPE) (R5P3E) - Oryza sativa (Rice) PRK05581 RPE Ribul_P_3_epim Rpe PRK08883 PRK08745 PRK09722 PRK08091 PRK08005 prote…	-1.41107
1.3.12	PS.calvin cycle.PRK	loc_os02g47020.1	Transcript	highly similar to ( 674) AT1G32060 | Symbols: PRK | PRK (PHOSPHORIBULOKINASE); ATP binding / phosphoribulokinase/ protein binding | chr1:11532668-11534406 FORWARDhighly similar to ( 775) KPPR_WHEAT Phosphoribulokinase, chloroplast precursor (EC 2.7.1.19) (Phosphopentokinase) (PRKase) (PRK) - Triticum aestivum (Wheat) PRK PRK07429 PRK Udk PRK05480 UMPK protein|phosphoribulokinase/Uridine kinase fa…	-4.90256
1.3.13	PS.calvin cycle.rubisco interacting	loc_os11g47970.1	Transcript	highly similar to ( 699) AT2G39730 | Symbols: RCA | RCA (RUBISCO ACTIVASE); ADP binding / ATP binding / enzyme regulator/ ribulose-1,5-bisphosphate carboxylase/oxygenase activator | chr2:16571174-16573345 REVERSEhighly similar to ( 855) RCA_ORYSA Ribulose bisphosphate carboxylase/oxygenase activase, chloroplast precursor (RuBisCO activase) (RA) - Oryza sativa (Rice) AAA protein|AAA-type ATPase fa…	-6.46799
2.1.1.1	major CHO metabolism.synthesis.sucrose.SPS	loc_os11g12810.1	Transcript	highly similar to ( 806) AT4G10120 | Symbols: ATSPS4F | ATSPS4F; transferase, transferring glycosyl groups | chr4:6315033-6319785 FORWARDhighly similar to ( 771) SPS_MAIZE Sucrose-phosphate synthase (EC 2.4.1.14) (UDP-glucose-fructose-phosphate glucosyltransferase) - Zea mays (Maize) RfaG Glycos_transf_1 protein|sucrose-phosphate synthase, putative, expressed	-1.24733
2.1.1.2	major CHO metabolism.synthesis.sucrose.SPP	loc_os02g05030.1	Transcript	highly similar to ( 561) AT2G35840 | Symbols: | sucrose-phosphatase 1 (SPP1) | chr2:15053952-15055776 FORWARDS6PP S6PP_C Hydrolase_3 Cof protein|sucrose-phosphatase, putative, expressed	-2.55165
2.1.1.2	major CHO metabolism.synthesis.sucrose.SPP	loc_os05g05270.1	Transcript	moderately similar to ( 496) AT2G35840 | Symbols: | sucrose-phosphatase 1 (SPP1) | chr2:15053952-15055776 FORWARDS6PP S6PP_C Cof protein|sucrose-phosphatase, putative, expressed	2.99952
2.1.1.2	major CHO metabolism.synthesis.sucrose.SPP	loc_os01g27880.1	Transcript	highly similar to ( 546) AT2G35840 | Symbols: | sucrose-phosphatase 1 (SPP1) | chr2:15053952-15055776 FORWARDS6PP S6PP_C Hydrolase_3 Cof protein|sucrose-phosphatase, putative, expressed	-3.18718
2.1.2	major CHO metabolism.synthesis.starch	loc_os04g43700.1	Transcript	moderately similar to ( 274) AT5G18480 | Symbols: PGSIP6 | PGSIP6 (PLANT GLYCOGENIN-LIKE STARCH INITIATION PROTEIN 6); transferase, transferring glycosyl groups / transferase, transferring hexosyl groups | chr5:6131307-6133787 REVERSEGlyco_transf_8 protein|glycosyl transferase 8 domain containing protein, putative, expressed	2.33148
2.1.2	major CHO metabolism.synthesis.starch	loc_os02g41520.1	Transcript	highly similar to ( 545) AT5G18480 | Symbols: PGSIP6 | PGSIP6 (PLANT GLYCOGENIN-LIKE STARCH INITIATION PROTEIN 6); transferase, transferring glycosyl groups / transferase, transferring hexosyl groups | chr5:6131307-6133787 REVERSEGlyco_transf_8 protein|glycosyl transferase 8 domain containing protein, putative, expressed	-1.29732
2.1.2.1	major CHO metabolism.synthesis.starch.AGPase	loc_os08g25734.1	Transcript	highly similar to ( 816) AT5G48300 | Symbols: ADG1, APS1 | ADG1 (ADP GLUCOSE PYROPHOSPHORYLASE 1); glucose-1-phosphate adenylyltransferase | chr5:19570326-19572557 FORWARDhighly similar to ( 851) GLGS_HORVU Glucose-1-phosphate adenylyltransferase small subunit, chloroplast precursor (EC 2.7.7.27) (ADP-glucose synthase) (ADP-glucose pyrophosphorylase) (AGPase B) (Alpha-D-glucose-1-phosphate adenyl…	-3.38821
2.1.2.1	major CHO metabolism.synthesis.starch.AGPase	loc_os03g52460.1	Transcript	highly similar to ( 770) AT5G19220 | Symbols: ADG2, APL1 | APL1 (ADP GLUCOSE PYROPHOSPHORYLASE LARGE SUBUNIT 1); glucose-1-phosphate adenylyltransferase | chr5:6463931-6466775 REVERSEhighly similar to ( 764) GLGL3_SOLTU Glucose-1-phosphate adenylyltransferase large subunit 3, chloroplast precursor (EC 2.7.7.27) (ADP-glucose synthase) (ADP-glucose pyrophosphorylase) (AGPase S) (Alpha-D-glucose-1-p…	-3.58882
2.1.2.2	major CHO metabolism.synthesis.starch.starch synthase	loc_os02g51070.1	Transcript	highly similar to ( 863) AT3G01180 | Symbols: AtSS2 | AtSS2 (starch synthase 2); transferase, transferring glycosyl groups | chr3:62456-65678 REVERSEnearly identical (1248) SSY22_ORYSA Soluble starch synthase 2-2, chloroplast precursor (EC 2.4.1.21) (Soluble starch synthase II-2) - Oryza sativa (Rice)glgA GlgA Glyco_transf_5 protein|starch synthase, putative, expressed	-4.51959
2.1.2.2	major CHO metabolism.synthesis.starch.starch synthase	loc_os07g22930.2	Transcript	highly similar to ( 766) AT1G32900 | Symbols: | starch synthase, putative | chr1:11920582-11923506 REVERSEhighly similar to ( 964) SSG1B_HORVU Granule-bound starch synthase 1b, chloroplast precursor (EC 2.4.1.242) (Granule-bound starch synthase Ib) (Fragment) - Hordeum vulgare (Barley)glgA GlgA Glyco_transf_5 Glycos_transf_1 protein|starch synthase, putative, expressed	-9.06923
2.1.2.2	major CHO metabolism.synthesis.starch.starch synthase	loc_os04g53310.1	Transcript	nearly identical (1172) AT1G11720 | Symbols: ATSS3 | ATSS3 (starch synthase 3); starch synthase/ transferase, transferring glycosyl groups | chr1:3952511-3956840 FORWARDnearly identical (1264) SSY3_SOLTU Soluble starch synthase 3, chloroplast precursor (EC 2.4.1.21) (SS III) (Soluble starch synthase III) - Solanum tuberosum (Potato)glgA GlgA Glyco_transf_5 SSIII protein|soluble starch synthase 3,…	-7.82066
2.1.2.3	major CHO metabolism.synthesis.starch.starch branching	loc_os04g33460.1	Transcript	moderately similar to ( 362) AT5G03650 | Symbols: SBE2.2 | SBE2.2 (starch branching enzyme 2.2); 1,4-alpha-glucan branching enzyme | chr5:931924-937470 FORWARDmoderately similar to ( 347) GLGB_MAIZE 1,4-alpha-glucan branching enzyme IIB, chloroplast precursor (EC 2.4.1.18) (Starch branching enzyme IIB) (Q-enzyme) - Zea mays (Maize) Glycogen_branching_enzyme_like_N_term GlgB protein|1,4-alpha-gluc…	-1.8788
2.2.1.1	major CHO metabolism.degradation.sucrose.fructokinase	loc_os03g40550.1	Transcript	moderately similar to ( 448) AT1G69200 | Symbols: | kinase | chr1:26016018-26018365 FORWARDweakly similar to ( 139) SCRK1_ORYSA Fructokinase-1 (EC 2.7.1.4) (Fructokinase I) (OsFKI) - Oryza sativa (Rice) bac_FRK RbsK PRK09434 PfkB KdgK protein|kinase, pfkB family, putative, expressed	3.74675
2.2.1.3.2	major CHO metabolism.degradation.sucrose.invertases.cell wall	loc_os09g08120.1	Transcript	moderately similar to ( 282) AT1G55120 | Symbols: ATFRUCT5 | ATFRUCT5 (BETA-FRUCTOFURANOSIDASE 5); hydrolase, hydrolyzing O-glycosyl compounds / levanase | chr1:20566983-20569165 FORWARDhighly similar to ( 536) INV7_ORYSA Beta-fructofuranosidase, insoluble isoenzyme 7 precursor (EC 3.2.1.26) (Sucrose hydrolase 7) (Invertase 7) (Cell wall beta-fructosidase 7) (OsCIN7) - Oryza sativa (Rice) Glyco_h…	4.52308
2.2.1.3.3	major CHO metabolism.degradation.sucrose.invertases.vacuolar	loc_os02g01590.1	Transcript	highly similar to ( 655) AT1G12240 | Symbols: ATBETAFRUCT4, VAC-INV | ATBETAFRUCT4; beta-fructofuranosidase/ hydrolase, hydrolyzing O-glycosyl compounds | chr1:4153699-4157457 FORWARDhighly similar to ( 737) INV1_MAIZE Beta-fructofuranosidase 1 precursor (EC 3.2.1.26) (Sucrose 1) (Invertase 1) - Zea mays (Maize) Glyco_32 Glyco_hydro_32N SacC protein|glycosyl hydrolases, putative, expressed	-7.06657
2.2.1.3.3	major CHO metabolism.degradation.sucrose.invertases.vacuolar	loc_os09g08120.1	Transcript	moderately similar to ( 282) AT1G55120 | Symbols: ATFRUCT5 | ATFRUCT5 (BETA-FRUCTOFURANOSIDASE 5); hydrolase, hydrolyzing O-glycosyl compounds / levanase | chr1:20566983-20569165 FORWARDhighly similar to ( 536) INV7_ORYSA Beta-fructofuranosidase, insoluble isoenzyme 7 precursor (EC 3.2.1.26) (Sucrose hydrolase 7) (Invertase 7) (Cell wall beta-fructosidase 7) (OsCIN7) - Oryza sativa (Rice) Glyco_h…	4.52308
2.2.1.4	major CHO metabolism.degradation.sucrose.hexokinase	loc_os05g09500.1	Transcript	highly similar to ( 524) AT4G29130 | Symbols: ATHXK1, GIN2, HXK1 | HXK1 (HEXOKINASE 1); ATP binding / fructokinase/ glucokinase/ hexokinase | chr4:14352338-14354865 REVERSEhighly similar to ( 796) HXK7_ORYSA Hexokinase-7 (EC 2.7.1.1) (Hexokinase-6) - Oryza sativa (Rice) COG5026 Hexokinase_2 Hexokinase_1 protein|hexokinase, putative, expressed	5.75441
2.2.1.4	major CHO metabolism.degradation.sucrose.hexokinase	loc_os01g71320.1	Transcript	highly similar to ( 534) AT1G50460 | Symbols: HKL1 | HKL1 (HEXOKINASE-LIKE 1); ATP binding / fructokinase/ glucokinase/ hexokinase | chr1:18694031-18697429 FORWARDhighly similar to ( 850) HXK3_ORYSA Hexokinase-3 (EC 2.7.1.1) (Hexokinase-8) - Oryza sativa (Rice) COG5026 Hexokinase_2 Hexokinase_1 protein|hexokinase, putative, expressed	-3.93122
2.2.2.1.2	major CHO metabolism.degradation.starch.starch cleavage.beta amylase	loc_os07g35940.1	Transcript	highly similar to ( 629) AT4G15210 | Symbols: ATBETA-AMY, AT-BETA-AMY, RAM1 | BAM5 (BETA-AMYLASE 5); beta-amylase | chr4:8666852-8669357 REVERSEhighly similar to ( 890) AMYB_WHEAT Beta-amylase (EC 3.2.1.2) (1,4-alpha-D-glucan maltohydrolase) - Triticum aestivum (Wheat)Glyco_hydro_14 protein|beta-amylase, putative, expressed	5.72744
2.2.2.1.2	major CHO metabolism.degradation.starch.starch cleavage.beta amylase	loc_os03g04770.1	Transcript	highly similar to ( 693) AT3G23920 | Symbols: BAM1, BMY7, TR-BAMY | BAM1 (BETA-AMYLASE 1); beta-amylase | chr3:8641722-8644199 FORWARDmoderately similar to ( 463) AMYB_SOYBN Beta-amylase (EC 3.2.1.2) (1,4-alpha-D-glucan maltohydrolase) - Glycine max (Soybean)Glyco_hydro_14 protein|beta-amylase, putative, expressed	-6.10377
2.2.2.1.2	major CHO metabolism.degradation.starch.starch cleavage.beta amylase	loc_os10g41550.1	Transcript	highly similar to ( 616) AT4G17090 | Symbols: CT-BMY, BAM3, BMY8 | CT-BMY (CHLOROPLAST BETA-AMYLASE); beta-amylase | chr4:9605266-9607250 REVERSEmoderately similar to ( 425) AMYB_SOYBN Beta-amylase (EC 3.2.1.2) (1,4-alpha-D-glucan maltohydrolase) - Glycine max (Soybean)Glyco_hydro_14 protein|beta-amylase, putative, expressed	2.04788
2.2.2.1.2	major CHO metabolism.degradation.starch.starch cleavage.beta amylase	loc_os07g35880.1	Transcript	highly similar to ( 613) AT4G15210 | Symbols: ATBETA-AMY, AT-BETA-AMY, RAM1 | BAM5 (BETA-AMYLASE 5); beta-amylase | chr4:8666852-8669357 REVERSEhighly similar to ( 644) AMYB_MEDSA Beta-amylase (EC 3.2.1.2) (1,4-alpha-D-glucan maltohydrolase) - Medicago sativa (Alfalfa)Glyco_hydro_14 protein|beta-amylase, putative, expressed	-9.36102
2.2.2.1.2	major CHO metabolism.degradation.starch.starch cleavage.beta amylase	loc_os02g03690.1	Transcript	highly similar to ( 615) AT5G45300 | Symbols: BMY2, BAM8 | BMY2 (BETA-AMYLASE 2); beta-amylase/ catalytic/ cation binding | chr5:18353636-18356696 FORWARDmoderately similar to ( 384) AMYB_SOYBN Beta-amylase (EC 3.2.1.2) (1,4-alpha-D-glucan maltohydrolase) - Glycine max (Soybean)Glyco_hydro_14 DUF822 protein|beta-amylase, putative, expressed	1.99952
2.2.2.3	major CHO metabolism.degradation.starch.glucan water dikinase	loc_os06g30310.1	Transcript	nearly identical (1346) AT1G10760 | Symbols: SEX1, SOP1, SOP, GWD1, GWD | SEX1 (STARCH EXCESS 1); alpha-glucan, water dikinase | chr1:3581210-3590043 REVERSEnearly identical (1421) GWD1_SOLTU Alpha-glucan water dikinase, chloroplast precursor (EC 2.7.9.4) (EC 2.7.13.3) (Starch-related R1 protein) - Solanum tuberosum (Potato)PPDK_N protein|alpha-glucan water dikinase, chloroplast precursor, putati…	2.33917
2.2.2.6	major CHO metabolism.degradation.starch.transporter	loc_os04g51330.1	Transcript	moderately similar to ( 357) AT5G17520 | Symbols: RCP1, MEX1 | RCP1 (ROOT CAP 1); maltose transmembrane transporter | chr5:5772796-5775231 REVERSEhighly similar to ( 583) MEX1_ORYSA Maltose excess protein 1-like, chloroplast precursor - Oryza sativa (Rice) protein|maltose excess protein 1-like, chloroplast precursor, putative, expressed	-1.58544
3.1.1.2	minor CHO metabolism.raffinose family.galactinol synthases.putative	loc_os03g20120.1	Transcript	moderately similar to ( 488) AT2G47180 | Symbols: AtGolS1 | AtGolS1 (Arabidopsis thaliana galactinol synthase 1); transferase, transferring glycosyl groups / transferase, transferring hexosyl groups | chr2:19369049-19370372 REVERSE Glyco_transf_8 protein|glycosyl transferase 8 domain containing protein, putative, expressed	-5.54994
3.1.2.1	minor CHO metabolism.raffinose family.raffinose synthases.known	loc_os01g07530.1	Transcript	highly similar to ( 981) AT5G40390 | Symbols: SIP1 | SIP1 (seed imbibition 1-like); galactinol-sucrose galactosyltransferase/ hydrolase, hydrolyzing O-glycosyl compounds | chr5:16161720-16165085 FORWARDmoderately similar to ( 489) STSYN_PEA Stachyose synthase precursor (EC 2.4.1.67) (Galactinol--raffinose galactosyltransferase) - Pisum sativum (Garden pea)Raffinose_syn protein|uncharacterized gly…	-4.72863
3.1.2.2	minor CHO metabolism.raffinose family.raffinose synthases.putative	loc_os08g38710.1	Transcript	nearly identical (1093) AT1G55740 | Symbols: AtSIP1 | AtSIP1 (Arabidopsis thaliana seed imbibition 1); hydrolase, hydrolyzing O-glycosyl compounds | chr1:20835507-20838707 REVERSEmoderately similar to ( 443) STSYN_PEA Stachyose synthase precursor (EC 2.4.1.67) (Galactinol--raffinose galactosyltransferase) - Pisum sativum (Garden pea)Raffinose_syn protein|uncharacterized glycosyltransferase, putat…	8.11846
3.1.2.2	minor CHO metabolism.raffinose family.raffinose synthases.putative	loc_os06g07600.1	Transcript	highly similar to (1000) AT5G20250 | Symbols: DIN10 | DIN10 (DARK INDUCIBLE 10); hydrolase, hydrolyzing O-glycosyl compounds | chr5:6834207-6836635 FORWARDmoderately similar to ( 274) STSYN_PEA Stachyose synthase precursor (EC 2.4.1.67) (Galactinol--raffinose galactosyltransferase) - Pisum sativum (Garden pea)Raffinose_syn protein|uncharacterized glycosyltransferase, putative, expressed	6.22264
3.1.2.2	minor CHO metabolism.raffinose family.raffinose synthases.putative	loc_os04g40520.1	Transcript	highly similar to ( 694) AT3G57520 | Symbols: AtSIP2 | AtSIP2 (Arabidopsis thaliana seed imbibition 2); hydrolase, hydrolyzing O-glycosyl compounds | chr3:21289299-21292694 REVERSEmoderately similar to ( 271) STSYN_PEA Stachyose synthase precursor (EC 2.4.1.67) (Galactinol--raffinose galactosyltransferase) - Pisum sativum (Garden pea)Raffinose_syn protein|uncharacterized glycosyltransferase, puta…	2.16246
3.2.1	minor CHO metabolism.trehalose.TPS	loc_os05g44210.2	Transcript	highly similar to ( 612) AT1G78580 | Symbols: ATTPS1, TPS1 | ATTPS1 (TREHALOSE-6-PHOSPHATE SYNTHASE); alpha,alpha-trehalose-phosphate synthase (UDP-forming)/ transferase, transferring glycosyl groups | chr1:29552495-29557482 REVERSE Trehalose_PPase Glyco_transf_20 OtsA OtsB protein|trehalose-6-phosphate synthase, putative, expressed	-3.49233
3.2.1	minor CHO metabolism.trehalose.TPS	loc_os09g20990.1	Transcript	nearly identical (1152) AT1G60140 | Symbols: ATTPS10, TPS10 | ATTPS10 (trehalose phosphate synthase); transferase, transferring glycosyl groups / trehalose-phosphatase | chr1:22177246-22180073 REVERSE Glyco_transf_20 OtsA Trehalose_PPase PRK10117 OtsB protein|trehalose-6-phosphate synthase, putative, expressed	2.86869
3.2.1	minor CHO metabolism.trehalose.TPS	loc_os05g44210.1	Transcript	nearly identical (1279) AT1G78580 | Symbols: ATTPS1, TPS1 | ATTPS1 (TREHALOSE-6-PHOSPHATE SYNTHASE); alpha,alpha-trehalose-phosphate synthase (UDP-forming)/ transferase, transferring glycosyl groups | chr1:29552495-29557482 REVERSE Glyco_transf_20 OtsA PRK10117 Trehalose_PPase OtsB protein|trehalose-6-phosphate synthase, putative, expressed	-2.84848
3.2.2	minor CHO metabolism.trehalose.TPP	loc_os03g26910.1	Transcript	moderately similar to ( 364) AT4G39770 | Symbols: | trehalose-6-phosphate phosphatase, putative | chr4:18449138-18451218 REVERSE Trehalose_PPase OtsB protein|uncharacterized glycosyl hydrolase Rv2006/MT2062, putative, expressed	-5.109
3.2.2	minor CHO metabolism.trehalose.TPP	loc_os08g31630.1	Transcript	moderately similar to ( 428) AT4G39770 | Symbols: | trehalose-6-phosphate phosphatase, putative | chr4:18449138-18451218 REVERSE Trehalose_PPase OtsB protein|uncharacterized glycosyl hydrolase Rv2006/MT2062, putative, expressed	-7.70678
3.2.3	minor CHO metabolism.trehalose.potential TPS/TPP	loc_os01g53000.1	Transcript	nearly identical (1236) AT1G06410 | Symbols: ATTPS7, TPS7, ATTPSA | ATTPS7; alpha,alpha-trehalose-phosphate synthase (UDP-forming)/ transferase, transferring glycosyl groups / trehalose-phosphatase | chr1:1955413-1958153 FORWARD Glyco_transf_20 OtsA PRK10117 Trehalose_PPase OtsB protein|trehalose synthase, putative, expressed	1.24583
3.2.3	minor CHO metabolism.trehalose.potential TPS/TPP	loc_os02g54820.3	Transcript	highly similar to ( 887) AT2G18700 | Symbols: ATTPS11, TPS11, ATTPSB | ATTPS11; transferase, transferring glycosyl groups | chr2:8109043-8111799 FORWARD Glyco_transf_20 OtsA PRK10117 Trehalose_PPase OtsB protein|trehalose-6-phosphate synthase, putative, expressed	1.8811
3.2.3	minor CHO metabolism.trehalose.potential TPS/TPP	loc_os08g31980.1	Transcript	nearly identical (1152) AT1G60140 | Symbols: ATTPS10, TPS10 | ATTPS10 (trehalose phosphate synthase); transferase, transferring glycosyl groups / trehalose-phosphatase | chr1:22177246-22180073 REVERSE Glyco_transf_20 OtsA Trehalose_PPase PRK10117 OtsB protein|trehalose-6-phosphate synthase, putative, expressed	2.10162
3.2.4	minor CHO metabolism.trehalose.trehalase	loc_os10g37660.1	Transcript	highly similar to ( 531) AT4G24040 | Symbols: ATTRE1, TRE1 | TRE1 (TREHALASE 1); alpha,alpha-trehalase/ trehalase | chr4:12488242-12491060 FORWARD Trehalase TreA protein|trehalase precursor, putative, expressed	-7.05242
3.4.2	minor CHO metabolism.myo-inositol.InsP-Kinases	loc_os04g56580.1	Transcript	moderately similar to ( 428) AT5G42810 | Symbols: ATIPK1 | ATIPK1 (Inositol-pentakisphosphate 2-kinase 1); inositol pentakisphosphate 2-kinase/ inositol tetrakisphosphate 2-kinase | chr5:17167073-17169337 FORWARD DUF941 protein|inositol 1,3,4,5,6-pentakisphosphate 2-kinase, putative, expressed	1.60894
3.4.4	minor CHO metabolism.myo-inositol.myo inositol oxygenases	loc_os06g36560.1	Transcript	moderately similar to ( 480) AT1G14520 | Symbols: MIOX1 | MIOX1 (MYO-INISITOL OXYGENASE); inositol oxygenase/ oxidoreductase | chr1:4968376-4969954 REVERSEhighly similar to ( 625) MIOX_ORYSA Probable inositol oxygenase (EC 1.13.99.1) (Myo-inositol oxygenase) - Oryza sativa (Rice) DUF706 protein|inositol oxygenase, putative, expressed	5.49137
3.5	minor CHO metabolism.others	loc_os01g01620.1	Transcript	moderately similar to ( 488) AT1G19600 | Symbols: | pfkB-type carbohydrate kinase family protein | chr1:6779085-6780898 FORWARD adenosine_kinase KdgK PfkB RbsK ribokinase_group_A ribokinase bac_FRK protein|kinase, pfkB family, putative, expressed	1.18985
3.5	minor CHO metabolism.others	loc_os10g37330.1	Transcript	highly similar to ( 548) AT5G53580 | Symbols: | aldo/keto reductase family protein | chr5:21765215-21766919 REVERSEvery weakly similar to (89.7) KCAB_ORYSA Probable voltage-gated potassium channel subunit beta (K(+) channel subunit beta) - Oryza sativa (Rice) Tas Aldo_ket_red ARA1 PRK09912 PRK10625 PRK10376 dkgA protein|oxidoreductase, aldo/keto reductase family protein, putative, expressed	-2.24255
3.5	minor CHO metabolism.others	loc_os10g02480.1	Transcript	moderately similar to ( 330) AT1G59960 | Symbols: | aldo/keto reductase, putative | chr1:22071410-22073067 REVERSEmoderately similar to ( 367) NADO2_ORYSA Probable NAD(P)H-dependent oxidoreductase 2 (EC 1.-.-.-) - Oryza sativa (Rice) Aldo_ket_red ARA1 dkgB dkgA Tas COG4989 protein|oxidoreductase, aldo/keto reductase family protein, putative, expressed	1.06057
3.5	minor CHO metabolism.others	loc_os07g04990.1	Transcript	highly similar to ( 503) AT1G06690 | Symbols: | aldo/keto reductase family protein | chr1:2049742-2052039 REVERSEvery weakly similar to (84.7) A115_TOBAC Auxin-induced protein PCNT115 - Nicotiana tabacum (Common tobacco) Tas ARA1 Aldo_ket_red COG4989 PRK10625 PRK09912 protein|oxidoreductase, aldo/keto reductase family protein, putative, expressed	-5.48161
3.5	minor CHO metabolism.others	loc_os10g02380.1	Transcript	moderately similar to ( 340) AT1G59960 | Symbols: | aldo/keto reductase, putative | chr1:22071410-22073067 REVERSEhighly similar to ( 636) NADO1_ORYSA Probable NAD(P)H-dependent oxidoreductase 1 (EC 1.1.1.-) - Oryza sativa (Rice) Aldo_ket_red ARA1 dkgA dkgB Tas COG4989 protein|oxidoreductase, aldo/keto reductase family protein, putative, expressed	2.68305
3.5	minor CHO metabolism.others	loc_os01g62860.1	Transcript	moderately similar to ( 457) AT2G37790 | Symbols: | aldo/keto reductase family protein | chr2:15838838-15840752 FORWARDmoderately similar to ( 258) ALDR_HORVU Aldose reductase (EC 1.1.1.21) (AR) (Aldehyde reductase) - Hordeum vulgare (Barley) Aldo_ket_red ARA1 dkgA dkgB Tas protein|oxidoreductase, aldo/keto reductase family protein, putative, expressed	-8.72291
3.5	minor CHO metabolism.others	loc_os04g38530.1	Transcript	moderately similar to ( 336) AT5G15140 | Symbols: | aldose 1-epimerase family protein | chr5:4908686-4910670 FORWARD galM Aldose_epim GalM protein|aldose 1-epimerase, putative, expressed	5.11846
3.5	minor CHO metabolism.others	loc_os01g62870.1	Transcript	moderately similar to ( 469) AT2G37790 | Symbols: | aldo/keto reductase family protein | chr2:15838838-15840752 FORWARDmoderately similar to ( 271) ALDR_HORVU Aldose reductase (EC 1.1.1.21) (AR) (Aldehyde reductase) - Hordeum vulgare (Barley) Aldo_ket_red ARA1 dkgA dkgB Tas protein|oxidoreductase, aldo/keto reductase family protein, putative, expressed	-4.4042
3.5	minor CHO metabolism.others	loc_os07g04990.2	Transcript	moderately similar to ( 390) AT1G06690 | Symbols: | aldo/keto reductase family protein | chr1:2049742-2052039 REVERSE Tas ARA1 Aldo_ket_red PRK10625 protein|oxidoreductase, aldo/keto reductase family protein, putative, expressed	-7.4816
3.5	minor CHO metabolism.others	loc_os01g01120.1	Transcript	moderately similar to ( 272) AT5G53850 | Symbols: | haloacid dehalogenase-like hydrolase family protein | chr5:21861617-21864817 REVERSE COG4229 protein|enolase-phosphatase E1, putative, expressed	-3.0263
3.5	minor CHO metabolism.others	loc_os03g13390.2	Transcript	moderately similar to ( 369) AT1G59960 | Symbols: | aldo/keto reductase, putative | chr1:22071410-22073067 REVERSEmoderately similar to ( 417) NADO1_ORYSA Probable NAD(P)H-dependent oxidoreductase 1 (EC 1.1.1.-) - Oryza sativa (Rice) Aldo_ket_red ARA1 dkgA dkgB Tas protein|oxidoreductase, aldo/keto reductase family protein, putative, expressed	3.37359
3.5	minor CHO metabolism.others	loc_os04g37470.1	Transcript	moderately similar to ( 276) AT1G59960 | Symbols: | aldo/keto reductase, putative | chr1:22071410-22073067 REVERSEmoderately similar to ( 290) NADO1_ORYSA Probable NAD(P)H-dependent oxidoreductase 1 (EC 1.1.1.-) - Oryza sativa (Rice) Aldo_ket_red ARA1 dkgB dkgA Tas COG4989 protein|oxidoreductase, aldo/keto reductase family protein, putative, expressed	2.09468
3.5	minor CHO metabolism.others	loc_os01g47550.1	Transcript	moderately similar to ( 392) AT1G17160 | Symbols: | pfkB-type carbohydrate kinase family protein | chr1:5867678-5869175 FORWARD ribokinase PRK11142 PfkB RbsK ribokinase_group_A ribokinase_group_B KdgK adenosine_kinase YeiC_kinase_like RfaE_like bac_FRK FruK_PfkB_like FruK protein|kinase, pfkB family, putative, expressed	2.79494
3.5	minor CHO metabolism.others	loc_os07g05000.1	Transcript	highly similar to ( 555) AT1G06690 | Symbols: | aldo/keto reductase family protein | chr1:2049742-2052039 REVERSEvery weakly similar to (81.6) A115_TOBAC Auxin-induced protein PCNT115 - Nicotiana tabacum (Common tobacco) Tas Aldo_ket_red ARA1 PRK09912 COG4989 PRK10625 protein|oxidoreductase, aldo/keto reductase family protein, putative, expressed	-5.93052
3.5	minor CHO metabolism.others	loc_os09g15820.1	Transcript	moderately similar to ( 433) AT5G66530 | Symbols: | aldose 1-epimerase family protein | chr5:26553821-26555575 REVERSE COG0676 Aldose_epim protein|aldose 1-epimerase, putative, expressed	-1.67033
3.5	minor CHO metabolism.others	loc_os04g38540.1	Transcript	moderately similar to ( 317) AT5G15140 | Symbols: | aldose 1-epimerase family protein | chr5:4908686-4910670 FORWARD galM Aldose_epim GalM protein|aldose 1-epimerase, putative, expressed	8.10888
3.5	minor CHO metabolism.others	loc_os04g48020.1	Transcript	weakly similar to ( 150) AT5G52190 | Symbols: | sugar isomerase (SIS) domain-containing protein | chr5:21201817-21202443 REVERSEGutQ protein|3-hexulose-6-phosphate isomerase, putative, expressed	1.23831
3.6	minor CHO metabolism.callose	loc_os06g08380.1	Transcript	nearly identical (2837) AT2G13680 | Symbols: CALS5, GLS2, ATGSL02 | CALS5 (CALLOSE SYNTHASE 5); 1,3-beta-glucan synthase | chr2:5695124-5706134 FORWARD Glucan_synthase protein|1,3-beta-glucan synthase component domain containing protein, expressed	4.08698
3.6	minor CHO metabolism.callose	loc_os06g51270.1	Transcript	nearly identical (1952) AT5G13000 | Symbols: ATGSL12, gsl12 | ATGSL12 (glucan synthase-like 12); 1,3-beta-glucan synthase/ transferase, transferring glycosyl groups | chr5:4110445-4121202 REVERSE Glucan_synthase protein|1,3-beta-glucan synthase component domain containing protein, expressed	-1.33063
3.6	minor CHO metabolism.callose	loc_os01g48200.1	Transcript	highly similar to ( 640) AT4G03550 | Symbols: ATGSL05, GSL05, ATGSL5, PMR4, GSL5 | ATGSL05 (GLUCAN SYNTHASE-LIKE 5); 1,3-beta-glucan synthase/ transferase, transferring glycosyl groups | chr4:1573513-1579195 FORWARD Glucan_synthase protein|callose synthase, putative, expressed	-1.49365
3.6	minor CHO metabolism.callose	loc_os01g55040.1	Transcript	nearly identical (2241) AT4G03550 | Symbols: ATGSL05, GSL05, ATGSL5, PMR4, GSL5 | ATGSL05 (GLUCAN SYNTHASE-LIKE 5); 1,3-beta-glucan synthase/ transferase, transferring glycosyl groups | chr4:1573513-1579195 FORWARD Glucan_synthase protein|1,3-beta-glucan synthase component, putative, expressed	1.14838
3.8.1	minor CHO metabolism.galactose.galactokinases	loc_os03g61710.1	Transcript	highly similar to ( 675) AT3G06580 | Symbols: GAL1, GALK | GALK; ATP binding / galactokinase | chr3:2049141-2051867 REVERSE GalK PRK05322 PRK05101 PRK03817 protein|GHMP kinases ATP-binding protein, putative, expressed	2.86695
3.8.2	minor CHO metabolism.galactose.alpha-galactosidases	loc_os10g35110.1	Transcript	highly similar to ( 515) AT5G08370 | Symbols: AtAGAL2 | AtAGAL2 (Arabidopsis thaliana ALPHA-GALACTOSIDASE 2); alpha-galactosidase/ catalytic/ hydrolase, hydrolyzing O-glycosyl compounds | chr5:2691116-2693441 REVERSEhighly similar to ( 714) AGAL_ORYSA Alpha-galactosidase precursor (EC 3.2.1.22) (Melibiase) (Alpha-D-galactoside galactohydrolase) - Oryza sativa (Rice) Melibiase protein|alpha-galact…	2.72199
3.99	minor CHO metabolism.misc	loc_os04g41340.1	Transcript	highly similar to ( 541) AT5G36790 | Symbols: | phosphoglycolate phosphatase, putative | chr5:14481229-14483730 REVERSE NagD PRK10444 protein|4-nitrophenylphosphatase, putative, expressed	-6.78006
3.99	minor CHO metabolism.misc	loc_os09g08660.1	Transcript	moderately similar to ( 427) AT5G47760 | Symbols: PGLP2, ATPGLP2, ATPK5 | ATPGLP2 (ARABIDOPSIS THALIANA 2-PHOSPHOGLYCOLATE PHOSPHATASE 2); phosphoglycolate phosphatase/ protein serine/threonine kinase | chr5:19343121-19344979 REVERSE NagD PRK10444 protein|4-nitrophenylphosphatase, putative, expressed	-1.80117
4.1.8	glycolysis.cytosolic branch.glyceraldehyde 3-phosphate dehydrogenase (GAP-DH)	loc_os02g07490.1	Transcript	highly similar to ( 582) AT1G16300 | Symbols: GAPCP-2 | GAPCP-2; NAD or NADH binding / binding / catalytic/ glyceraldehyde-3-phosphate dehydrogenase (phosphorylating)/ glyceraldehyde-3-phosphate dehydrogenase | chr1:5574433-5577406 FORWARDmoderately similar to ( 477) G3PC_GINBI Glyceraldehyde-3-phosphate dehydrogenase, cytosolic (EC 1.2.1.12) - Ginkgo biloba (Ginkgo) GapA PRK07729 PRK07403 PRK089…	-2.16275
4.1.10	glycolysis.cytosolic branch.aldolase	loc_os09g02540.1	Transcript	weakly similar to ( 106) AT5G03690 | Symbols: | fructose-bisphosphate aldolase, putative | chr5:963389-964982 REVERSEweakly similar to ( 102) ALF_SPIOL Fructose-bisphosphate aldolase, cytoplasmic isozyme (EC 4.1.2.13) - Spinacia oleracea (Spinach) Glycolytic FBP_aldolase_I_a protein|expressed protein	3.32145
4.1.12	glycolysis.cytosolic branch.phosphoglycerate mutase	loc_os12g35040.1	Transcript	highly similar to ( 669) AT3G30841 | Symbols: | 2,3-biphosphoglycerate-independent phosphoglycerate mutase-related / phosphoglyceromutase-related | chr3:12591595-12593401 FORWARDPRK04024 COG3635 PRK04135 PRK04200 protein|2,3-bisphosphoglycerate-independent phosphoglycerate mutase, putative, expressed	1.14976
4.1.12	glycolysis.cytosolic branch.phosphoglycerate mutase	loc_os06g01950.1	Transcript	moderately similar to ( 228) AT3G05170 | Symbols: | phosphoglycerate/bisphosphoglycerate mutase family protein | chr3:1466738-1468219 FORWARDPGAM phoE protein|phosphoglycerate mutase, putative, expressed	1.39158
4.1.16	glycolysis.cytosolic branch.phospho-enol-pyruvate carboxylase kinase (PPCK)	loc_os04g43710.1	Transcript	very weakly similar to (90.1) AT1G08650 | Symbols: PPCK1 | PPCK1 (PHOSPHOENOLPYRUVATE CARBOXYLASE KINASE); kinase/ protein serine/threonine kinase | chr1:2752206-2753232 FORWARD S_TKc S_TKc Pkinase SPS1 protein|CAMK_CAMK_like.3 - CAMK includes calcium/calmodulin depedent protein kinases, expressed	7.62888
4.2.4	glycolysis.plastid branch.phosphofructokinase (PFK)	loc_os05g10650.1	Transcript	highly similar to ( 717) AT4G26270 | Symbols: PFK3 | PFK3 (PHOSPHOFRUCTOKINASE 3); 6-phosphofructokinase | chr4:13301094-13304030 REVERSE PRK06830 PfkA PRK03202 PFK PFK Bacterial_PFK PRK06555 PRK07085 Pyrophosphate_PFK Eukaryotic_PFK protein|6-phosphofructokinase, putative, expressed	-5.32241
4.2.4	glycolysis.plastid branch.phosphofructokinase (PFK)	loc_os01g09570.1	Transcript	highly similar to ( 751) AT4G26270 | Symbols: PFK3 | PFK3 (PHOSPHOFRUCTOKINASE 3); 6-phosphofructokinase | chr4:13301094-13304030 REVERSE PRK06830 PfkA PRK03202 PFK PFK Bacterial_PFK PRK07085 PRK06555 Pyrophosphate_PFK Eukaryotic_PFK protein|6-phosphofructokinase, putative, expressed	-2.72534
4.2.4	glycolysis.plastid branch.phosphofructokinase (PFK)	loc_os05g44922.1	Transcript	highly similar to ( 731) AT4G26270 | Symbols: PFK3 | PFK3 (PHOSPHOFRUCTOKINASE 3); 6-phosphofructokinase | chr4:13301094-13304030 REVERSE PRK06830 PfkA PRK03202 PFK PFK Bacterial_PFK PRK06555 PRK07085 Pyrophosphate_PFK Eukaryotic_PFK protein|6-phosphofructokinase, putative, expressed	2.64338
4.2.14	glycolysis.plastid branch.pyruvate kinase (PK)	loc_os07g08340.1	Transcript	highly similar to ( 812) AT3G22960 | Symbols: PKP1, PKP-ALPHA | PKP-ALPHA; pyruvate kinase | chr3:8139369-8141771 FORWARDhighly similar to ( 830) KPYA_RICCO Pyruvate kinase isozyme A, chloroplast precursor (EC 2.7.1.40) - Ricinus communis (Castor bean) PykF PRK05826 Pyruvate_Kinase PRK06354 PRK06247 PRK09206 PK PRK06739 PRK08187 protein|pyruvate kinase, putative, expressed	4.48495
4.3.16	glycolysis.unclear/dually targeted.phospho-enol-pyruvate carboxylase kinase (PEPCK)	loc_os04g43710.1	Transcript	very weakly similar to (90.1) AT1G08650 | Symbols: PPCK1 | PPCK1 (PHOSPHOENOLPYRUVATE CARBOXYLASE KINASE); kinase/ protein serine/threonine kinase | chr1:2752206-2753232 FORWARD S_TKc S_TKc Pkinase SPS1 protein|CAMK_CAMK_like.3 - CAMK includes calcium/calmodulin depedent protein kinases, expressed	7.62888
5.1	fermentation.LDH	loc_os02g01510.1	Transcript	moderately similar to ( 415) AT4G17260 | Symbols: | L-lactate dehydrogenase, putative | chr4:9674057-9675309 FORWARDhighly similar to ( 549) LDHA_HORVU L-lactate dehydrogenase A (EC 1.1.1.27) (LDH-A) - Hordeum vulgare (Barley) LDH ldh Mdh LDH_MDH PRK06223 LDH-like_MDH Ldh_1_N Ldh_1_C MDH_glycosomal_mitochondrial protein|lactate/malate dehydrogenase, putative, expressed	2.01678
5.1	fermentation.LDH	loc_os09g26880.1	Transcript	highly similar to ( 790) AT1G54100 | Symbols: ALDH7B4 | ALDH7B4 (Aldehyde Dehydrogenase 7B4); 3-chloroallyl aldehyde dehydrogenase/ oxidoreductase | chr1:20195435-20198853 REVERSEhighly similar to ( 813) AL7A1_MALDO Aldehyde dehydrogenase family 7 member A1 (EC 1.2.1.3) (Antiquitin-1) (Matured fruit 60 kDa protein) (MF-60) - Malus domestica (Apple) (Malus sylvestris) Aldedh PutA PRK10090 PRK03137…	4.32145
5.2	fermentation.PDC	loc_os01g32080.1	Transcript	highly similar to ( 834) AT5G17380 | Symbols: | pyruvate decarboxylase family protein | chr5:5724920-5726720 REVERSEweakly similar to ( 144) ILV1_TOBAC Acetolactate synthase 1, chloroplast precursor (EC 2.2.1.6) (Acetolactate synthase I) (Acetohydroxy-acid synthase I) (ALS I) - Nicotiana tabacum (Common tobacco) PRK09259 IlvB PRK05858 PRK08322 PRK06276 PRK08527 TPP_BZL_OCoD_HPCL PRK06048 PRK08611…	1.39545
5.10	fermentation.aldehyde dehydrogenase	loc_os02g43194.1	Transcript	highly similar to ( 541) AT4G36250 | Symbols: ALDH3F1 | ALDH3F1 (Aldehyde Dehydrogenase 3F1); 3-chloroallyl aldehyde dehydrogenase/ aldehyde dehydrogenase (NAD) | chr4:17151029-17153381 FORWARDweakly similar to ( 132) BADH_SPIOL Betaine-aldehyde dehydrogenase, chloroplast precursor (EC 1.2.1.8) (BADH) - Spinacia oleracea (Spinach) PutA Aldedh gabD2 PRK03137 PRK09847 PRK10090 gabD gabD1 PRK11904 p…	-2.43111
5.10	fermentation.aldehyde dehydrogenase	loc_os06g15990.1	Transcript	highly similar to ( 852) AT1G23800 | Symbols: ALDH2B7, ALDH2B | ALDH2B7; 3-chloroallyl aldehyde dehydrogenase/ aldehyde dehydrogenase (NAD) | chr1:8412238-8414804 REVERSEmoderately similar to ( 365) BADH_SPIOL Betaine-aldehyde dehydrogenase, chloroplast precursor (EC 1.2.1.8) (BADH) - Spinacia oleracea (Spinach) Aldedh PutA PRK09847 PRK10090 PRK03137 gabD gabD2 gabD1 PRK11904 PRK11905 COG4230 put…	2.55838
5.10	fermentation.aldehyde dehydrogenase	loc_os09g26880.1	Transcript	highly similar to ( 790) AT1G54100 | Symbols: ALDH7B4 | ALDH7B4 (Aldehyde Dehydrogenase 7B4); 3-chloroallyl aldehyde dehydrogenase/ oxidoreductase | chr1:20195435-20198853 REVERSEhighly similar to ( 813) AL7A1_MALDO Aldehyde dehydrogenase family 7 member A1 (EC 1.2.1.3) (Antiquitin-1) (Matured fruit 60 kDa protein) (MF-60) - Malus domestica (Apple) (Malus sylvestris) Aldedh PutA PRK10090 PRK03137…	4.32145
5.10	fermentation.aldehyde dehydrogenase	loc_os01g40860.1	Transcript	highly similar to ( 709) AT3G24503 | Symbols: ALDH2C4, ALDH1A, REF1 | ALDH2C4; 3-chloroallyl aldehyde dehydrogenase/ aldehyde dehydrogenase (NAD)/ coniferyl-aldehyde dehydrogenase | chr3:8919732-8923029 REVERSEmoderately similar to ( 369) BADH_SPIOL Betaine-aldehyde dehydrogenase, chloroplast precursor (EC 1.2.1.8) (BADH) - Spinacia oleracea (Spinach) Aldedh PutA PRK09847 PRK10090 gabD gabD2 PRK0…	-5.53186
5.10	fermentation.aldehyde dehydrogenase	loc_os09g26880.4	Transcript	highly similar to ( 630) AT1G54100 | Symbols: ALDH7B4 | ALDH7B4 (Aldehyde Dehydrogenase 7B4); 3-chloroallyl aldehyde dehydrogenase/ oxidoreductase | chr1:20195435-20198853 REVERSEhighly similar to ( 637) AL7A1_MALDO Aldehyde dehydrogenase family 7 member A1 (EC 1.2.1.3) (Antiquitin-1) (Matured fruit 60 kDa protein) (MF-60) - Malus domestica (Apple) (Malus sylvestris) Aldedh PutA PRK03137 PRK10090…	9.7945
6.1	gluconeogenese/ glyoxylate cycle.citrate synthase	loc_os02g13840.1	Transcript	highly similar to ( 816) AT2G42790 | Symbols: CSY3 | CSY3 (citrate synthase 3); citrate (SI)-synthase | chr2:17803132-17805991 REVERSEhighly similar to ( 811) CYSZ_CUCMA Citrate synthase, glyoxysomal precursor (EC 2.3.3.1) (GCS) - Cucurbita maxima (Pumpkin) (Winter squash) gltA PRK12351 GltA Citrate_synt PRK12349 PRK12350 PRK09569 PRK06224 protein|citrate synthase, putative, expressed	1.66128
6.2	gluconeogenese/ glyoxylate cycle.malate synthase	loc_os04g40990.1	Transcript	highly similar to ( 797) AT5G03860 | Symbols: MLS | MLS (MALATE SYNTHASE); malate synthase | chr5:1032276-1034527 REVERSEhighly similar to ( 878) MASY_MAIZE Malate synthase, glyoxysomal (EC 2.3.3.9) - Zea mays (Maize) malate_synt_A Malate_synthase PRK09255 malate_synt AceB protein|malate synthase, glyoxysomal, putative, expressed	11.1081
6.2	gluconeogenese/ glyoxylate cycle.malate synthase	loc_os04g40990.2	Transcript	highly similar to ( 607) AT5G03860 | Symbols: MLS | MLS (MALATE SYNTHASE); malate synthase | chr5:1032276-1034527 REVERSEhighly similar to ( 655) MASY_MAIZE Malate synthase, glyoxysomal (EC 2.3.3.9) - Zea mays (Maize) malate_synt_A Malate_synthase PRK09255 malate_synt AceB protein|malate synthase, glyoxysomal, putative, expressed	8.57559
6.3	gluconeogenesis.Malate DH	loc_os12g43630.1	Transcript	highly similar to ( 554) AT2G22780 | Symbols: PMDH1 | PMDH1 (PEROXISOMAL NAD-MALATE DEHYDROGENASE 1); L-malate dehydrogenase/ binding / catalytic/ malate dehydrogenase/ oxidoreductase/ oxidoreductase, acting on the CH-OH group of donors, NAD or NADP as acceptor | chr2:9689995-9691923 REVERSEhighly similar to ( 668) MDHG_ORYSA Malate dehydrogenase, glyoxysomal precursor (EC 1.1.1.37) - Oryza sativ…	2.45895
6.3	gluconeogenesis.Malate DH	loc_os07g43700.1	Transcript	moderately similar to ( 434) AT3G47520 | Symbols: MDH | MDH (MALATE DEHYDROGENASE); L-malate dehydrogenase/ binding / catalytic/ malate dehydrogenase/ oxidoreductase/ oxidoreductase, acting on the CH-OH group of donors, NAD or NADP as acceptor | chr3:17513657-17514868 FORWARDmoderately similar to ( 373) MDHG_ORYSA Malate dehydrogenase, glyoxysomal precursor (EC 1.1.1.37) - Oryza sativa (Rice) MDH…	-8.50231
6.3	gluconeogenesis.Malate DH	loc_os08g33720.1	Transcript	highly similar to ( 516) AT3G47520 | Symbols: MDH | MDH (MALATE DEHYDROGENASE); L-malate dehydrogenase/ binding / catalytic/ malate dehydrogenase/ oxidoreductase/ oxidoreductase, acting on the CH-OH group of donors, NAD or NADP as acceptor | chr3:17513657-17514868 FORWARDmoderately similar to ( 387) MDHG_ORYSA Malate dehydrogenase, glyoxysomal precursor (EC 1.1.1.37) - Oryza sativa (Rice) MDH_gly…	-5.05359
6.4	gluconeogenese/ glyoxylate cycle.PEPCK	loc_os03g15050.1	Transcript	highly similar to ( 959) AT4G37870 | Symbols: PCK1, PEPCK | PCK1 (PHOSPHOENOLPYRUVATE CARBOXYKINASE 1); ATP binding / phosphoenolpyruvate carboxykinase (ATP)/ phosphoenolpyruvate carboxykinase/ purine nucleotide binding | chr4:17802974-17806332 REVERSEnearly identical (1022) PEPCK_MAIZE Phosphoenolpyruvate carboxykinase [ATP] (EC 4.1.1.49) (PEP carboxykinase) (Phosphoenolpyruvate carboxylase) (PE…	3.88216
6.4	gluconeogenese/ glyoxylate cycle.PEPCK	loc_os10g13700.2	Transcript	highly similar to ( 837) AT4G37870 | Symbols: PCK1, PEPCK | PCK1 (PHOSPHOENOLPYRUVATE CARBOXYKINASE 1); ATP binding / phosphoenolpyruvate carboxykinase (ATP)/ phosphoenolpyruvate carboxykinase/ purine nucleotide binding | chr4:17802974-17806332 REVERSEhighly similar to ( 837) PEPCK_MAIZE Phosphoenolpyruvate carboxykinase [ATP] (EC 4.1.1.49) (PEP carboxykinase) (Phosphoenolpyruvate carboxylase) (P…	1.54972
7.1.1	OPP.oxidative PP.G6PD	loc_os04g40874.1	Transcript	moderately similar to ( 389) AT5G40760 | Symbols: G6PD6 | G6PD6 (GLUCOSE-6-PHOSPHATE DEHYDROGENASE 6); glucose-6-phosphate dehydrogenase | chr5:16311284-16314556 FORWARDmoderately similar to ( 395) G6PD_SOLTU Glucose-6-phosphate 1-dehydrogenase, cytoplasmic isoform (EC 1.1.1.49) (G6PD) - Solanum tuberosum (Potato) PRK05722 Zwf PRK12853 G6PD_N PRK12854 G6PD_C protein|glucose-6-phosphate 1-dehydrog…	2.53003
7.1.2	OPP.oxidative PP.6-phosphogluconolactonase	loc_os07g41280.1	Transcript	moderately similar to ( 332) AT1G13700 | Symbols: | glucosamine/galactosamine-6-phosphate isomerase family protein | chr1:4694475-4695600 REVERSE 6PGL NagB GlcN6P_deaminase protein|6-phosphogluconolactonase, putative, expressed	4.08698
7.1.3	OPP.oxidative PP.6-phosphogluconate dehydrogenase	loc_os11g29400.1	Transcript	highly similar to ( 691) AT5G41670 | Symbols: | 6-phosphogluconate dehydrogenase family protein | chr5:16665647-16667110 REVERSE PRK09287 Gnd 6PGD PRK09599 Gnd PRK12490 NAD_binding_2 MmsB protein|6-phosphogluconate dehydrogenase, decarboxylating, putative, expressed	-1.31487
7.1.3	OPP.oxidative PP.6-phosphogluconate dehydrogenase	loc_os06g14740.1	Transcript	nearly identical (1668) AT1G18270 | Symbols: | ketose-bisphosphate aldolase class-II family protein | chr1:6283634-6293772 REVERSE TBP_aldolase_IIB Fba PRK12857 gatY gatY F_bP_aldolase MmsB PRK08185 PRK06806 PRK05835 PRK07709 PRK07315 PRK09196 kbaY PRK08610 PRK06801 garR PRK07084 FTBP_aldolase_II COG3395 NAD_binding_2 gatY PRK09197 FBP_aldolase_IIA protein|NAD binding domain of 6-phosphogluconate…	2.72398
7.1.3	OPP.oxidative PP.6-phosphogluconate dehydrogenase	loc_os02g35500.1	Transcript	moderately similar to ( 432) AT3G25530 | Symbols: GHBDH, ATGHBDH, GLYR1, GR1 | GLYR1 (GLYOXYLATE REDUCTASE 1); 3-hydroxybutyrate dehydrogenase/ phosphogluconate dehydrogenase (decarboxylating) | chr3:9271949-9273514 REVERSE MmsB garR NAD_binding_2 protein|NAD binding domain of 6-phosphogluconate dehydrogenase containing protein, expressed	-1.95789
7.1.3	OPP.oxidative PP.6-phosphogluconate dehydrogenase	loc_os05g49070.1	Transcript	weakly similar to ( 159) AT4G29120 | Symbols: | 6-phosphogluconate dehydrogenase NAD-binding domain-containing protein | chr4:14350861-14351865 FORWARD MmsB garR NAD_binding_2 PRK09599 protein|dehydrogenase, putative, expressed	1.60438
7.2.2	OPP.non-reductive PP.transaldolase	loc_os08g05830.1	Transcript	moderately similar to ( 482) AT1G12230 | Symbols: | transaldolase, putative | chr1:4148050-4150708 FORWARD Transaldolase_TalAB PRK05269 PRK12309 PRK12346 Transaldolase MipB Transaldolase PRK01362 Transaldolase_FSA protein|transaldolase, putative, expressed	6.28492
7.2.2	OPP.non-reductive PP.transaldolase	loc_os01g70170.1	Transcript	highly similar to ( 611) AT5G13420 | Symbols: | transaldolase, putative | chr5:4302080-4304212 REVERSE PRK03343 Transaldolase_like PRK09533 Transaldolase PRK03903 Transaldolase MipB protein|transaldolase, putative, expressed	2.55306
7.2.3	OPP.non-reductive PP.ribulose-phosphate 3-epimerase	loc_os09g32810.2	Transcript	moderately similar to ( 315) AT3G01850 | Symbols: | ribulose-phosphate 3-epimerase, cytosolic, putative / pentose-5-phosphate 3-epimerase, putative | chr3:300428-301987 REVERSEmoderately similar to ( 375) RPE1_ORYSA Ribulose-phosphate 3-epimerase, cytoplasmic isoform (EC 5.1.3.1) (Ribulose-5-phosphate-epimerase) (Cyt-RPEase) (RPEcyt) (Pentose-5-phosphate 3-epimerase) (PPE) - Oryza sativa (Rice) R…	1.42076
7.2.4	OPP.non-reductive PP.ribose 5-phosphate isomerase	loc_os07g08030.1	Transcript	moderately similar to ( 352) AT3G04790 | Symbols: | ribose 5-phosphate isomerase-related | chr3:1313365-1314195 FORWARD RPI_A RpiA PRK00702 Rib_5-P_isom_A protein|ribose-5-phosphate isomerase A, putative, expressed	-4.63888
7.3	OPP.electron transfer	loc_os07g05400.1	Transcript	highly similar to ( 597) AT4G05390 | Symbols: ATRFNR1 | ATRFNR1 (ROOT FNR 1); FAD binding / NADP or NADPH binding / electron carrier/ ferredoxin-NADP+ reductase/ oxidoreductase | chr4:2738839-2740483 REVERSEhighly similar to ( 723) FENR3_ORYSA Ferredoxin--NADP reductase, embryo isozyme, chloroplast precursor (EC 1.18.1.2) (FNR) - Oryza sativa (Rice) CysJ NAD_binding_1 PRK06214 cysJ protein|ferred…	1.51233
8.1.1.1	TCA / org. transformation.TCA.pyruvate DH.E1	loc_os03g44300.1	Transcript	highly similar to ( 575) AT1G30120 | Symbols: PDH-E1 BETA | PDH-E1 BETA (PYRUVATE DEHYDROGENASE E1 BETA); pyruvate dehydrogenase (acetyl-transferring) | chr1:10584350-10586477 REVERSEmoderately similar to ( 419) ODPB_MESVI Pyruvate dehydrogenase E1 component subunit beta (EC 1.2.4.1) - Mesostigma viride odpB AcoB PRK09212 PRK11892 Transket_pyr Transketolase_C COG3958 Dxs protein|transketolase, pu…	1.3033
8.1.1.1	TCA / org. transformation.TCA.pyruvate DH.E1	loc_os04g02900.1	Transcript	highly similar to ( 639) AT1G01090 | Symbols: PDH-E1 ALPHA | PDH-E1 ALPHA (PYRUVATE DEHYDROGENASE E1 ALPHA); pyruvate dehydrogenase (acetyl-transferring) | chr1:47705-49166 REVERSEmoderately similar to ( 251) ODPA_SOLTU Pyruvate dehydrogenase E1 component subunit alpha, mitochondrial precursor (EC 1.2.4.1) (PDHE1-A) - Solanum tuberosum (Potato) AcoA TPP_E1_PDC_ADC_BCADC E1_dh protein|dehydrogenas…	4.7248
8.1.1.1	TCA / org. transformation.TCA.pyruvate DH.E1	loc_os09g33500.1	Transcript	highly similar to ( 570) AT5G50850 | Symbols: MAB1 | MAB1 (MACCI-BOU); catalytic/ pyruvate dehydrogenase (acetyl-transferring) | chr5:20689671-20692976 FORWARDhighly similar to ( 580) ODPB_PEA Pyruvate dehydrogenase E1 component subunit beta, mitochondrial precursor (EC 1.2.4.1) (PDHE1-B) - Pisum sativum (Garden pea) PRK11892 PRK09212 AcoB odpB Transket_pyr Transketolase_C COG3958 PRK05444 Dxs PR…	2.5335
8.1.1.1	TCA / org. transformation.TCA.pyruvate DH.E1	loc_os02g50620.1	Transcript	highly similar to ( 650) AT1G59900 | Symbols: AT-E1 ALPHA | AT-E1 ALPHA; oxidoreductase, acting on the aldehyde or oxo group of donors, disulfide as acceptor / pyruvate dehydrogenase (acetyl-transferring) | chr1:22051368-22053660 FORWARDhighly similar to ( 650) ODPA_SOLTU Pyruvate dehydrogenase E1 component subunit alpha, mitochondrial precursor (EC 1.2.4.1) (PDHE1-A) - Solanum tuberosum (Potato)…	-1.72511
8.1.1.1	TCA / org. transformation.TCA.pyruvate DH.E1	loc_os07g07470.1	Transcript	highly similar to ( 582) AT1G55510 | Symbols: BCDH BETA1 | BCDH BETA1 (BRANCHED-CHAIN ALPHA-KETO ACID DECARBOXYLASE E1 BETA SUBUNIT); 3-methyl-2-oxobutanoate dehydrogenase (2-methylpropanoyl-transferring)/ catalytic | chr1:20723482-20725505 FORWARDweakly similar to ( 179) ODPB_PEA Pyruvate dehydrogenase E1 component subunit beta, mitochondrial precursor (EC 1.2.4.1) (PDHE1-B) - Pisum sativum (Gar…	2.48432
8.1.1.2	TCA / org. transformation.TCA.pyruvate DH.E2	loc_os12g08170.1	Transcript	moderately similar to ( 497) AT1G34430 | Symbols: EMB3003 | EMB3003 (embryo defective 3003); acyltransferase/ dihydrolipoyllysine-residue acetyltransferase/ protein binding | chr1:12588027-12590084 REVERSE PRK11856 AceF PRK11855 2-oxoacid_dh aceF PRK11857 PRK05704 PRK11892 kgd protein|2-oxo acid dehydrogenases acyltransferase domain containing protein, expressed	1.73242
8.1.1.2	TCA / org. transformation.TCA.pyruvate DH.E2	loc_os08g33440.1	Transcript	moderately similar to ( 485) AT3G25860 | Symbols: LTA2, PLE2 | LTA2; dihydrolipoyllysine-residue acetyltransferase | chr3:9460632-9462585 FORWARD PRK11856 AceF PRK11855 2-oxoacid_dh aceF PRK11857 PRK05704 PRK11892 kgd protein|2-oxo acid dehydrogenases acyltransferase domain containing protein, expressed	2.60618
8.1.1.3	TCA / org. transformation.TCA.pyruvate DH.E3	loc_os01g23610.1	Transcript	highly similar to ( 822) AT3G16950 | Symbols: LPD1, ptlpd1 | LPD1 (LIPOAMIDE DEHYDROGENASE 1); dihydrolipoyl dehydrogenase | chr3:5786508-5790383 REVERSEmoderately similar to ( 231) DLDH_PEA Dihydrolipoyl dehydrogenase, mitochondrial precursor (EC 1.8.1.4) (Dihydrolipoamide dehydrogenase) (Pyruvate dehydrogenase complex E3 subunit) (PDC-E3) (E3) (Glycine cleavage system L protein) - Pisum sativum…	2.32145
8.1.1.3	TCA / org. transformation.TCA.pyruvate DH.E3	loc_os05g06460.1	Transcript	highly similar to ( 805) AT3G16950 | Symbols: LPD1, ptlpd1 | LPD1 (LIPOAMIDE DEHYDROGENASE 1); dihydrolipoyl dehydrogenase | chr3:5786508-5790383 REVERSEmoderately similar to ( 227) DLDH_PEA Dihydrolipoyl dehydrogenase, mitochondrial precursor (EC 1.8.1.4) (Dihydrolipoamide dehydrogenase) (Pyruvate dehydrogenase complex E3 subunit) (PDC-E3) (E3) (Glycine cleavage system L protein) - Pisum sativum…	4.38654
8.1.3	TCA / org. transformation.TCA.aconitase	loc_os03g04410.1	Transcript	nearly identical (1579) AT2G05710 | Symbols: | aconitate hydratase, cytoplasmic, putative / citrate hydro-lyase/aconitase, putative | chr2:2141591-2146350 FORWARDnearly identical (1593) ACOC_ORYSA Putative aconitate hydratase, cytoplasmic (EC 4.2.1.3) (Citrate hydro-lyase) (Aconitase) - Oryza sativa (Rice) PRK09277 acnA AcnA AcnA_IRP Aconitase PRK07229 AcnA_IRP_Swivel Aconitase AcnA_Mitochondrial…	1.85934
8.1.3	TCA / org. transformation.TCA.aconitase	loc_os08g09200.1	Transcript	nearly identical (1677) AT2G05710 | Symbols: | aconitate hydratase, cytoplasmic, putative / citrate hydro-lyase/aconitase, putative | chr2:2141591-2146350 FORWARDnearly identical (1835) ACOC_ORYSA Putative aconitate hydratase, cytoplasmic (EC 4.2.1.3) (Citrate hydro-lyase) (Aconitase) - Oryza sativa (Rice) PRK09277 acnA AcnA AcnA_IRP Aconitase PRK07229 AcnA_IRP_Swivel Aconitase AcnA_Mitochondrial…	3.60039
8.1.4	TCA / org. transformation.TCA.IDH	loc_os01g46610.1	Transcript	highly similar to ( 758) AT1G65930 | Symbols: | isocitrate dehydrogenase, putative / NADP+ isocitrate dehydrogenase, putative | chr1:24539088-24541861 FORWARDhighly similar to ( 763) IDHP_MEDSA Isocitrate dehydrogenase [NADP], chloroplast precursor (EC 1.1.1.42) (Oxalosuccinate decarboxylase) (IDH) (NADP(+)-specific ICDH) (IDP) (Fragment) - Medicago sativa (Alfalfa) PRK08299 Icd Iso_dh protein|de…	2.80632
8.1.5	TCA / org. transformation.TCA.2-oxoglutarate dehydrogenase	loc_os07g49520.1	Transcript	nearly identical (1774) AT3G55410 | Symbols: | 2-oxoglutarate dehydrogenase E1 component, putative / oxoglutarate decarboxylase, putative / alpha-ketoglutaric dehydrogenase, putative | chr3:20541897-20545728 FORWARD kgd SucA kgd TPP_E1_OGDC_like E1_dh Transket_pyr protein|2-oxoglutarate dehydrogenase E1 component, mitochondrial precursor, putative, expressed	3.64677
8.1.7	TCA / org. transformation.TCA.succinate dehydrogenase	loc_os08g02640.1	Transcript	moderately similar to ( 298) AT5G40650 | Symbols: SDH2-2 | SDH2-2; electron carrier/ succinate dehydrogenase | chr5:16281462-16283296 FORWARDweakly similar to ( 149) RT14_VICFA Mitochondrial ribosomal protein S14 - Vicia faba (Broad bean) sdhB FrdB PRK12575 PRK12577 PRK12385 PRK12576 PRK06259 rpsN PRK12386 rps14 protein|succinate dehydrogenase iron-sulfur subunit 2,mitochondrial precursor, putati…	2.21251
8.1.9	TCA / org. transformation.TCA.malate DH	loc_os05g49880.1	Transcript	moderately similar to ( 457) AT1G53240 | Symbols: | malate dehydrogenase (NAD), mitochondrial | chr1:19854966-19856802 REVERSEmoderately similar to ( 462) MDHM_FRAAN Malate dehydrogenase, mitochondrial precursor (EC 1.1.1.37) - Fragaria ananassa (Strawberry) MDH_glycosomal_mitochondrial PRK05086 Mdh LDH_MDH LDH-like_MDH Ldh_1_N PRK06223 Ldh_1_C MDH LDH ldh MDH_cytoplasmic_cytosolic PRK05442 prote…	-2.90737
8.1.9	TCA / org. transformation.TCA.malate DH	loc_os01g46070.1	Transcript	moderately similar to ( 484) AT3G15020 | Symbols: | malate dehydrogenase (NAD), mitochondrial, putative | chr3:5056139-5057865 FORWARDmoderately similar to ( 482) MDHM_FRAAN Malate dehydrogenase, mitochondrial precursor (EC 1.1.1.37) - Fragaria ananassa (Strawberry) MDH_glycosomal_mitochondrial PRK05086 Mdh LDH_MDH LDH-like_MDH Ldh_1_N PRK06223 Ldh_1_C MDH LDH ldh PRK05442 MDH_cytoplasmic_cytosol…	1.40345
8.1.9	TCA / org. transformation.TCA.malate DH	loc_os07g43700.1	Transcript	moderately similar to ( 434) AT3G47520 | Symbols: MDH | MDH (MALATE DEHYDROGENASE); L-malate dehydrogenase/ binding / catalytic/ malate dehydrogenase/ oxidoreductase/ oxidoreductase, acting on the CH-OH group of donors, NAD or NADP as acceptor | chr3:17513657-17514868 FORWARDmoderately similar to ( 373) MDHG_ORYSA Malate dehydrogenase, glyoxysomal precursor (EC 1.1.1.37) - Oryza sativa (Rice) MDH…	-8.50231
8.1.9	TCA / org. transformation.TCA.malate DH	loc_os08g33720.1	Transcript	highly similar to ( 516) AT3G47520 | Symbols: MDH | MDH (MALATE DEHYDROGENASE); L-malate dehydrogenase/ binding / catalytic/ malate dehydrogenase/ oxidoreductase/ oxidoreductase, acting on the CH-OH group of donors, NAD or NADP as acceptor | chr3:17513657-17514868 FORWARDmoderately similar to ( 387) MDHG_ORYSA Malate dehydrogenase, glyoxysomal precursor (EC 1.1.1.37) - Oryza sativa (Rice) MDH_gly…	-5.05359
8.2.9	TCA / org. transformation.other organic acid transformaitons.cyt MDH	loc_os08g44810.1	Transcript	highly similar to ( 674) AT5G58330 | Symbols: | malate dehydrogenase (NADP), chloroplast, putative | chr5:23580010-23582287 REVERSEhighly similar to ( 714) MDHP_MAIZE Malate dehydrogenase [NADP], chloroplast precursor (EC 1.1.1.82) (NADP-MDH) - Zea mays (Maize) MDH_choloroplast PRK05442 MDH MDH_cytoplasmic_cytosolic LDH_MDH Mdh MDH_1B Ldh_1_C Ldh_1_N protein|lactate/malate dehydrogenase, putative…	-2.26705
8.2.10	TCA / org. transformation.other organic acid transformaitons.malic	loc_os07g31380.1	Transcript	highly similar to ( 906) AT2G13560 | Symbols: | malate oxidoreductase, putative | chr2:5650089-5655103 FORWARDhighly similar to ( 896) MAOM_SOLTU NAD-dependent malic enzyme 62 kDa isoform, mitochondrial precursor (EC 1.1.1.39) (NAD-ME) - Solanum tuberosum (Potato) SfcA Malic_M malic PRK12862 PRK07232 PRK12861 protein|NAD-dependent malic enzyme, mitochondrial precursor, putative, expressed	1.24017
8.2.10	TCA / org. transformation.other organic acid transformaitons.malic	loc_os10g35960.1	Transcript	highly similar to ( 823) AT4G00570 | Symbols: | malate oxidoreductase, putative | chr4:242817-246522 REVERSEhighly similar to ( 828) MAON_SOLTU NAD-dependent malic enzyme 59 kDa isoform, mitochondrial precursor (EC 1.1.1.39) (NAD-ME) - Solanum tuberosum (Potato) SfcA Malic_M malic PRK07232 PRK12862 PRK12861 protein|NAD-dependent malic enzyme, mitochondrial precursor, putative, expressed	1.45103
8.2.10	TCA / org. transformation.other organic acid transformaitons.malic	loc_os05g09440.1	Transcript	highly similar to ( 964) AT5G25880 | Symbols: ATNADP-ME3 | ATNADP-ME3 (NADP-malic enzyme 3); malate dehydrogenase (oxaloacetate-decarboxylating) (NADP+)/ malic enzyme/ oxidoreductase, acting on NADH or NADPH, NAD or NADP as acceptor | chr5:9024549-9028260 FORWARDhighly similar to ( 997) MAOC_ORYSA NADP-dependent malic enzyme, chloroplast precursor (EC 1.1.1.40) (NADP-ME) - Oryza sativa (Rice) Mal…	-3.07669
8.3	TCA / org. transformation.carbonic anhydrases	loc_os01g45274.1	Transcript	moderately similar to ( 246) AT5G14740 | Symbols: CA2, CA18, BETA CA2 | CA2 (CARBONIC ANHYDRASE 2); carbonate dehydratase/ zinc ion binding | chr5:4758257-4762315 FORWARDmoderately similar to ( 385) CAHC_HORVU Carbonic anhydrase, chloroplast precursor (EC 4.2.1.1) (Carbonate dehydratase) - Hordeum vulgare (Barley) beta_CA_cladeB Pro_CA CynT beta_CA beta_CA_cladeA beta_CA_cladeC PRK10437 protein|c…	-3.76765
8.3	TCA / org. transformation.carbonic anhydrases	loc_os09g28910.4	Transcript	moderately similar to ( 280) AT4G33580 | Symbols: ATBCA5, BCA5 | carbonic anhydrase family protein / carbonate dehydratase family protein | chr4:16139406-16141363 FORWARDweakly similar to ( 188) CAHC_PEA Carbonic anhydrase, chloroplast precursor (EC 4.2.1.1) (Carbonate dehydratase) [Contains: Carbonic anhydrase, 27 kDa isoform; Carbonic anhydrase, 25 kDa isoform] - Pisum sativum (Garden pea) beta…	3.24745
8.3	TCA / org. transformation.carbonic anhydrases	loc_os08g32780.1	Transcript	moderately similar to ( 226) AT1G08080 | Symbols: ATACA7, ACA7 | ACA7 (ALPHA CARBONIC ANHYDRASE 7); carbonate dehydratase/ zinc ion binding | chr1:2517022-2518546 REVERSE alpha_CA_prokaryotic_like alpha_CA Cah Carb_anhydrase alpha_CA_IV_XV_like alpha_CA_I_II_III_XIII alpha_CA_VI alpha_CA_VI_IX_XII_XIV alpha_CA_V alpha_CARP_receptor_like alpha_CARP_X_XI_like alpha_CA_VII alpha_CA_XII_XIV alpha_CAR…	5.16945
8.3	TCA / org. transformation.carbonic anhydrases	loc_os01g45274.3	Transcript	moderately similar to ( 246) AT5G14740 | Symbols: CA2, CA18, BETA CA2 | CA2 (CARBONIC ANHYDRASE 2); carbonate dehydratase/ zinc ion binding | chr5:4758257-4762315 FORWARDmoderately similar to ( 367) CAHC_HORVU Carbonic anhydrase, chloroplast precursor (EC 4.2.1.1) (Carbonate dehydratase) - Hordeum vulgare (Barley) beta_CA_cladeB Pro_CA CynT beta_CA beta_CA_cladeA beta_CA_cladeC PRK10437 protein|c…	-7.1704
8.3	TCA / org. transformation.carbonic anhydrases	loc_os08g32750.1	Transcript	moderately similar to ( 231) AT1G08080 | Symbols: ATACA7, ACA7 | ACA7 (ALPHA CARBONIC ANHYDRASE 7); carbonate dehydratase/ zinc ion binding | chr1:2517022-2518546 REVERSE alpha_CA_prokaryotic_like alpha_CA Cah Carb_anhydrase alpha_CA_IV_XV_like alpha_CA_I_II_III_XIII alpha_CA_V alpha_CA_VI alpha_CA_VI_IX_XII_XIV alpha_CA_VII alpha_CARP_receptor_like alpha_CARP_X_XI_like alpha_CA_XII_XIV alpha_CAR…	4.21982
9.1.1	mitochondrial electron transport / ATP synthesis.NADH-DH.complex I	loc_os04g38900.2	Transcript	moderately similar to ( 326) AT5G40770 | Symbols: ATPHB3 | ATPHB3 (PROHIBITIN 3) | chr5:16315589-16316621 REVERSE Band_7_prohibitin PHB Band_7 HflC protein|prohibitin, putative, expressed	2.21794
9.1.1	mitochondrial electron transport / ATP synthesis.NADH-DH.complex I	loc_os07g15880.1	Transcript	moderately similar to ( 395) AT1G03860 | Symbols: ATPHB2 | ATPHB2 (PROHIBITIN 2) | chr1:979611-981157 REVERSE Band_7_prohibitin PHB Band_7 HflC protein|mitochondrial prohibitin complex protein 2, putative, expressed	2.86597
9.1.2	mitochondrial electron transport / ATP synthesis.NADH-DH.localisation not clear	loc_os05g45730.1	Transcript	moderately similar to ( 292) AT5G11770 | Symbols: | NADH-ubiquinone oxidoreductase 20 kDa subunit, mitochondrial | chr5:3791148-3792929 REVERSEmoderately similar to ( 290) NDUS7_BRAOL NADH-ubiquinone oxidoreductase 20 kDa subunit, mitochondrial precursor (EC 1.6.5.3) (EC 1.6.99.3) (Complex I-20kD) (CI-20kD) - Brassica oleracea (Wild cabbage) PRK06411 NuoB Oxidored_q6 COG3260 ndhK protein|ubiquino…	1.24534
9.1.2	mitochondrial electron transport / ATP synthesis.NADH-DH.localisation not clear	loc_os09g32430.1	Transcript	weakly similar to ( 131) AT4G26965 | Symbols: | NADH:ubiquinone oxidoreductase family protein | chr4:13539832-13542041 FORWARD protein|oxidoreductase, putative, expressed	1.91379
9.1.2	mitochondrial electron transport / ATP synthesis.NADH-DH.localisation not clear	loc_os05g43360.1	Transcript	moderately similar to ( 403) AT4G02580 | Symbols: | NADH-ubiquinone oxidoreductase 24 kDa subunit, putative | chr4:1134586-1136906 FORWARD Complex1_24kDa PRK07539 NuoE PRK12373 TRX_Fd_NuoE protein|NADH dehydrogenase flavoprotein 2, mitochondrial precursor, putative, expressed	1.14727
9.2.1	mitochondrial electron transport / ATP synthesis.NADH-DH.type II.internal matrix	loc_os08g04630.1	Transcript	moderately similar to ( 414) AT4G21490 | Symbols: NDB3 | NDB3; NADH dehydrogenase | chr4:11436495-11439326 REVERSE Ndh Pyr_redox_2 protein|external NADH-ubiquinone oxidoreductase 1, mitochondrial precursor, putative, expressed	-1.83506
9.2.2	mitochondrial electron transport / ATP synthesis.NADH-DH.type II.external	loc_os08g04630.1	Transcript	moderately similar to ( 414) AT4G21490 | Symbols: NDB3 | NDB3; NADH dehydrogenase | chr4:11436495-11439326 REVERSE Ndh Pyr_redox_2 protein|external NADH-ubiquinone oxidoreductase 1, mitochondrial precursor, putative, expressed	-1.83506
9.3	mitochondrial electron transport / ATP synthesis.electron transfer flavoprotein	loc_os04g10400.1	Transcript	moderately similar to ( 338) AT5G43430 | Symbols: ETFBETA | ETFBETA; electron carrier | chr5:17453831-17455111 FORWARD FixA ETF_beta ETF ETF protein|electron transfer flavoprotein subunit beta, putative, expressed	1.41626
9.3	mitochondrial electron transport / ATP synthesis.electron transfer flavoprotein	loc_os10g37210.1	Transcript	highly similar to ( 868) AT2G43400 | Symbols: ETFQO | ETFQO (electron-transfer flavoprotein:ubiquinone oxidoreductase); catalytic/ electron carrier/ electron-transferring-flavoprotein dehydrogenase | chr2:18021304-18025041 FORWARD FixC ETF_QO PRK10015 PRK10157 protein|FAD dependent oxidoreductase domain containing protein, expressed	3.16945
9.3	mitochondrial electron transport / ATP synthesis.electron transfer flavoprotein	loc_os03g61920.1	Transcript	moderately similar to ( 362) AT1G50940 | Symbols: ETFALPHA | ETFALPHA (electron transfer flavoprotein alpha); FAD binding / electron carrier | chr1:18878038-18879939 REVERSE FixB ETF_alpha ETF_alpha ETF PRK11916 fixB ETF protein|electron transfer flavoprotein subunit alpha, mitochondrial precursor, putative, expressed	2.71501
9.4	mitochondrial electron transport / ATP synthesis.alternative oxidase	loc_os02g47200.1	Transcript	moderately similar to ( 442) AT3G22370 | Symbols: AOX1A, ATAOX1A | AOX1A (ALTERNATIVE OXIDASE 1A); alternative oxidase | chr3:7906890-7908416 FORWARDmoderately similar to ( 430) AOX1_TOBAC Alternative oxidase 1, mitochondrial precursor (EC 1.-.-.-) - Nicotiana tabacum (Common tobacco)AOX AOX protein|transposon protein, putative, unclassified, expressed	-2.73638
9.5	mitochondrial electron transport / ATP synthesis.cytochrome c reductase	loc_os03g59220.1	Transcript	weakly similar to ( 142) AT5G25450 | Symbols: | ubiquinol-cytochrome C reductase complex 14 kDa protein, putative | chr5:8857036-8857849 FORWARDweakly similar to ( 149) UCR6_SOLTU Ubiquinol-cytochrome c reductase complex 14 kDa protein (EC 1.10.2.2) (CR14) - Solanum tuberosum (Potato) UCR_14kD protein|cytochrome b-c1 complex subunit 7, putative, expressed	1.99031
9.5	mitochondrial electron transport / ATP synthesis.cytochrome c reductase	loc_os08g14860.1	Transcript	weakly similar to ( 113) AT4G32470 | Symbols: | ubiquinol-cytochrome C reductase complex 14 kDa protein, putative | chr4:15669705-15671095 REVERSEweakly similar to ( 110) UCR6_SOLTU Ubiquinol-cytochrome c reductase complex 14 kDa protein (EC 1.10.2.2) (CR14) - Solanum tuberosum (Potato) protein|cytochrome b-c1 complex subunit 7, putative, expressed	3.23474
9.5	mitochondrial electron transport / ATP synthesis.cytochrome c reductase	loc_os11g06340.1	Transcript	weakly similar to ( 117) AT1G15120 | Symbols: | ubiquinol-cytochrome C reductase complex 7.8 kDa protein, putative / mitochondrial hinge protein, putative | chr1:5202648-5203950 FORWARDweakly similar to ( 101) UCRH_SOLTU Ubiquinol-cytochrome c reductase complex 7.8 kDa protein (EC 1.10.2.2) (Mitochondrial hinge protein) (CR7) - Solanum tuberosum (Potato) UCR_hinge protein|ubiquinol-cytochrome C r…	1.13702
9.6	mitochondrial electron transport / ATP synthesis.cytochrome c	loc_os01g66180.1	Transcript	weakly similar to ( 157) AT4G10040 | Symbols: CYTC-2 | CYTC-2 (cytochrome c-2); electron carrier/ heme binding / iron ion binding | chr4:6277083-6278281 FORWARDweakly similar to ( 160) CYC_ORYSA Cytochrome c - Oryza sativa (Rice) COG3474 protein|cytochrome c, putative, expressed	2.80688
9.6	mitochondrial electron transport / ATP synthesis.cytochrome c	loc_os03g55970.1	Transcript	highly similar to ( 691) AT1G49380 | Symbols: | cytochrome c biogenesis protein family | chr1:18276794-18279204 FORWARDResB ResB protein|uncharacterized protein ycf44, putative, expressed	2.33705
9.7	mitochondrial electron transport / ATP synthesis.cytochrome c oxidase	loc_os10g37690.1	Transcript	moderately similar to ( 292) AT2G46470 | Symbols: OXA1L | OXA1L (INNER MEMBRANE PROTEIN OXA1-LIKE) | chr2:19072659-19074948 FORWARD YidC PRK02944 60KD_IMP PRK01318 PRK00145 PRK01622 protein|inner membrane protein, putative, expressed	2.41737
9.7	mitochondrial electron transport / ATP synthesis.cytochrome c oxidase	loc_os03g10360.1	Transcript	moderately similar to ( 323) AT3G17910 | Symbols: SURF1 | SURF1 (SURFEIT 1) | chr3:6133581-6136053 FORWARD COG3346 protein|SURF1, putative, expressed	2.50732
9.7	mitochondrial electron transport / ATP synthesis.cytochrome c oxidase	loc_os07g42910.1	Transcript	weakly similar to ( 130) AT4G28060 | Symbols: | cytochrome c oxidase subunit 6b, putative | chr4:13944018-13944709 REVERSE Cyt_c_Oxidase_VIb COX6B protein|cytochrome c oxidase subunit, putative, expressed	1.19883
9.7	mitochondrial electron transport / ATP synthesis.cytochrome c oxidase	loc_os03g02480.1	Transcript	moderately similar to ( 243) AT2G46470 | Symbols: OXA1L | OXA1L (INNER MEMBRANE PROTEIN OXA1-LIKE) | chr2:19072659-19074948 FORWARD YidC PRK02944 60KD_IMP PRK01622 PRK00145 protein|inner membrane protein, putative, expressed	3.99952
9.7	mitochondrial electron transport / ATP synthesis.cytochrome c oxidase	loc_os12g37419.1	Transcript	weakly similar to ( 101) AT5G61310 | Symbols: | cytochrome c oxidase subunit Vc, putative / COX5C, putative | chr5:24653543-24653737 REVERSEweakly similar to ( 119) COX5C_ORYSA Cytochrome c oxidase polypeptide Vc (EC 1.9.3.1) (Cytochrome c oxidase subunit 5c) - Oryza sativa (Rice)COX5C protein|cytochrome c oxidase polypeptide Vc, putative, expressed	1.52824
9.9	mitochondrial electron transport / ATP synthesis.F1-ATPase	loc_os05g47980.1	Transcript	highly similar to ( 834) AT5G08690 | Symbols: | ATP synthase beta chain 2, mitochondrial | chr5:2825739-2828352 FORWARDhighly similar to ( 937) ATPBM_ORYSA ATP synthase subunit beta, mitochondrial precursor (EC 3.6.3.14) - Oryza sativa (Rice) PRK09280 AtpD atpB PRK12597 F1-ATPase_beta ATP-synt_ab FliI ATPase_flagellum-secretory_path_III PRK06936 fliI fliI PRK09099 PRK08149 PRK06315 fliI fliI PRK0…	1.45457
9.9	mitochondrial electron transport / ATP synthesis.F1-ATPase	loc_os02g03860.1	Transcript	moderately similar to ( 223) AT2G21870 | Symbols: | unknown protein | chr2:9320456-9322618 REVERSE protein|mitochondrial ATP synthase precursor, putative, expressed	1.25488
9.99	mitochondrial electron transport / ATP synthesis.unspecified	loc_os04g57790.1	Transcript	moderately similar to ( 377) AT2G03690 | Symbols: | coenzyme Q biosynthesis Coq4 family protein / ubiquinone biosynthesis Coq4 family protein | chr2:1122122-1123011 REVERSE Coq4 COQ4 protein|ubiquinone biosynthesis protein COQ4, putative, expressed	3.09102
10.1.2	cell wall.precursor synthesis.UGE	loc_os08g28730.1	Transcript	highly similar to ( 554) AT4G10960 | Symbols: UGE5 | UGE5 (UDP-D-glucose/UDP-D-galactose 4-epimerase 5); UDP-glucose 4-epimerase/ protein dimerization | chr4:6716083-6718472 REVERSEmoderately similar to ( 480) GALE1_PEA UDP-glucose 4-epimerase (EC 5.1.3.2) (Galactowaldenase) (UDP-galactose 4-epimerase) - Pisum sativum (Garden pea) GalE PRK10675 Epimerase WcaG RfbB Gmd PRK10217 PRK10084 protein|NA…	-4.53099
10.1.2	cell wall.precursor synthesis.UGE	loc_os09g35800.1	Transcript	highly similar to ( 531) AT1G12780 | Symbols: UGE1 | UGE1 (UDP-D-glucose/UDP-D-galactose 4-epimerase 1); UDP-glucose 4-epimerase/ protein dimerization | chr1:4356124-4358120 REVERSEhighly similar to ( 536) GALE1_PEA UDP-glucose 4-epimerase (EC 5.1.3.2) (Galactowaldenase) (UDP-galactose 4-epimerase) - Pisum sativum (Garden pea) GalE PRK10675 WcaG Epimerase RfbB Gmd PRK10217 protein|UDP-glucose 4-e…	-2.78898
10.1.3	cell wall.precursor synthesis.AXS	loc_os01g73790.1	Transcript	highly similar to ( 700) AT1G08200 | Symbols: AXS2 | AXS2 (UDP-D-APIOSE/UDP-D-XYLOSE SYNTHASE 2); UDP-glucuronate decarboxylase | chr1:2574259-2576609 REVERSE PRK11908 PRK08125 Epimerase WcaG protein|NAD dependent epimerase/dehydratase family protein, putative, expressed	-1.80783
10.1.4	cell wall.precursor synthesis.UGD	loc_os12g25690.1	Transcript	highly similar to ( 895) AT5G15490 | Symbols: | UDP-glucose 6-dehydrogenase, putative | chr5:5027872-5029314 REVERSEhighly similar to ( 909) UGDH_SOYBN UDP-glucose 6-dehydrogenase (EC 1.1.1.22) (UDP-Glc dehydrogenase) (UDP-GlcDH) (UDPGDH) - Glycine max (Soybean) Ugd UDPG_MGDP_dh_N WecC wecC UDPG_MGDP_dh UDPG_MGDP_dh_C protein|UDP-glucose 6-dehydrogenase, putative, expressed	-1.99474
10.1.4	cell wall.precursor synthesis.UGD	loc_os03g55070.1	Transcript	highly similar to ( 894) AT5G15490 | Symbols: | UDP-glucose 6-dehydrogenase, putative | chr5:5027872-5029314 REVERSEhighly similar to ( 904) UGDH_SOYBN UDP-glucose 6-dehydrogenase (EC 1.1.1.22) (UDP-Glc dehydrogenase) (UDP-GlcDH) (UDPGDH) - Glycine max (Soybean) Ugd UDPG_MGDP_dh_N WecC wecC UDPG_MGDP_dh UDPG_MGDP_dh_C protein|UDP-glucose 6-dehydrogenase, putative, expressed	-2.70092
10.1.5	cell wall.precursor synthesis.UXS	loc_os01g21320.1	Transcript	highly similar to ( 593) AT2G47650 | Symbols: UXS4 | UXS4 (UDP-XYLOSE SYNTHASE 4); UDP-glucuronate decarboxylase/ catalytic | chr2:19538751-19541364 REVERSEvery weakly similar to (93.6) GME1_ORYSA GDP-mannose 3,5-epimerase 1 (EC 5.1.3.18) (GDP-Man 3,5-epimerase 1) (OsGME-1) - Oryza sativa (Rice) WcaG RfbB Epimerase GalE PRK08125 PRK10084 PRK11908 PRK10217 Gmd PRK10675 RfbD protein|NAD dependent e…	2.74312
10.1.5	cell wall.precursor synthesis.UXS	loc_os03g17230.1	Transcript	highly similar to ( 580) AT3G53520 | Symbols: UXS1, ATUXS1 | UXS1 (UDP-GLUCURONIC ACID DECARBOXYLASE 1); UDP-glucuronate decarboxylase/ catalytic | chr3:19841635-19843520 FORWARDvery weakly similar to ( 100) GME1_ORYSA GDP-mannose 3,5-epimerase 1 (EC 5.1.3.18) (GDP-Man 3,5-epimerase 1) (OsGME-1) - Oryza sativa (Rice) WcaG Epimerase RfbB GalE PRK10084 PRK11908 PRK08125 Gmd PRK10217 PRK10675 RfbD p…	-3.55507
10.1.5	cell wall.precursor synthesis.UXS	loc_os07g47700.1	Transcript	highly similar to ( 653) AT3G62830 | Symbols: UXS2, ATUXS2 | AUD1; UDP-glucuronate decarboxylase/ catalytic/ dTDP-glucose 4,6-dehydratase | chr3:23232539-23235353 FORWARDweakly similar to ( 102) GME1_ORYSA GDP-mannose 3,5-epimerase 1 (EC 5.1.3.18) (GDP-Man 3,5-epimerase 1) (OsGME-1) - Oryza sativa (Rice) WcaG RfbB Epimerase GalE PRK10084 PRK08125 PRK11908 PRK10217 Gmd PRK10675 RfbD protein|NAD de…	-2.50925
10.1.12.1	cell wall.precursor synthesis.KDO pathway.arabinose-5-phosphate isomerase	loc_os02g06360.1	Transcript	moderately similar to ( 431) AT3G54690 | Symbols: | sugar isomerase (SIS) domain-containing protein / CBS domain-containing protein | chr3:20246586-20247810 FORWARDgutQ PRK10892 GutQ CBS_pair_KpsF_GutQ_assoc protein|uncharacterized protein CPn_0526/CP_0226/CPj0526/CpB0547, putative, expressed	-2.0097
10.1.12.4	cell wall.precursor synthesis.KDO pathway.CMP-KDO Synthetase	loc_os05g48750.1	Transcript	moderately similar to ( 404) AT1G53000 | Symbols: | cytidylyltransferase family | chr1:19745330-19747133 REVERSEPRK05450 KdsB CTP_transf_3 protein|3-deoxy-manno-octulosonate cytidylyltransferase, putative, expressed	2.45018
10.1.20	cell wall.precursor synthesis.phosphomannose isomerase	loc_os01g03710.1	Transcript	moderately similar to ( 469) AT3G02570 | Symbols: MEE31, PMI1 | MEE31 (MATERNAL EFFECT EMBRYO ARREST 31); mannose-6-phosphate isomerase | chr3:543463-545478 REVERSE PMI_typeI ManA protein|mannose-6-phosphate isomerase, putative, expressed	1.16945
10.1.30.1	cell wall.precursor synthesis.sugar kinases.galacturonic acid kinase	loc_os04g51880.6	Transcript	weakly similar to ( 142) AT3G10700 | Symbols: | GHMP kinase family protein | chr3:3346789-3350863 REVERSE PRK05322 GalK protein|GHMP kinases ATP-binding protein, putative, expressed	3.36875
10.1.30.2	cell wall.precursor synthesis.sugar kinases.arabinose-1-kinase	loc_os02g04840.1	Transcript	nearly identical (1516) AT4G16130 | Symbols: ARA1, ISA1, ATISA1 | ARA1 (ARABINOSE KINASE); ATP binding / L-arabinokinase/ galactokinase | chr4:9120875-9127656 FORWARD GalK PRK05101 PRK05322 PRK03817 protein|GHMP kinases ATP-binding protein, putative, expressed	3.26898
10.1.30.3	cell wall.precursor synthesis.sugar kinases.glucuronic acid kinase	loc_os11g11060.1	Transcript	highly similar to ( 523) AT3G01640 | Symbols: | GHMP kinase family protein | chr3:239418-241198 FORWARDERG12 protein|GHMP kinases ATP-binding protein, putative, expressed	3.01643
10.2	cell wall.cellulose synthesis	loc_os03g26044.1	Transcript	highly similar to ( 568) AT5G03760 | Symbols: ATCSLA09, CSLA09, ATCSLA9, CSLA9, RAT4 | ATCSLA09; mannan synthase/ transferase, transferring glycosyl groups | chr5:985910-990087 REVERSECOG1215 bcsA PRK11204 protein|CSLA5 - cellulose synthase-like family A; mannan synthase, expressed	4.57241
10.2.1	cell wall.cellulose synthesis.cellulose synthase	loc_os08g06380.1	Transcript	highly similar to ( 888) AT3G03050 | Symbols: CSLD3, KJK, ATCSLD3 | CSLD3 (CELLULOSE SYNTHASE-LIKE D3); cellulose synthase/ transferase, transferring glycosyl groups | chr3:687873-691629 FORWARDCellulose_synt protein|CSLF6 - cellulose synthase-like family F; beta1,3;1,4 glucan synthase, expressed	-9.8948
10.2.1	cell wall.cellulose synthesis.cellulose synthase	loc_os01g54620.1	Transcript	nearly identical (1497) AT4G18780 | Symbols: CESA8, IRX1, ATCESA8, LEW2 | IRX1 (IRREGULAR XYLEM 1); cellulose synthase/ transferase, transferring glycosyl groups | chr4:10312846-10316719 REVERSECellulose_synt protein|CESA4 - cellulose synthase, expressed	-4.42674
10.2.1	cell wall.cellulose synthesis.cellulose synthase	loc_os09g25490.1	Transcript	nearly identical (1701) AT5G17420 | Symbols: IRX3, CESA7, ATCESA7, MUR10 | IRX3 (IRREGULAR XYLEM 3); cellulose synthase | chr5:5736859-5741407 REVERSECellulose_synt protein|CESA9 - cellulose synthase, expressed	-2.00048
10.2.1	cell wall.cellulose synthesis.cellulose synthase	loc_os03g59340.1	Transcript	nearly identical (1733) AT5G05170 | Symbols: CESA3, IXR1, ATCESA3, ATH-B, CEV1 | CEV1 (CONSTITUTIVE EXPRESSION OF VSP 1); cellulose synthase/ transferase, transferring glycosyl groups | chr5:1530401-1535090 REVERSECellulose_synt protein|CESA2 - cellulose synthase, expressed	1.6679
10.2.1	cell wall.cellulose synthesis.cellulose synthase	loc_os05g08370.1	Transcript	nearly identical (1753) AT4G32410 | Symbols: CESA1, RSW1 | CESA1 (CELLULOSE SYNTHASE 1); cellulose synthase/ transferase, transferring glycosyl groups | chr4:15641009-15646388 REVERSECellulose_synt protein|CESA1 - cellulose synthase, expressed	-4.1057
10.2.1	cell wall.cellulose synthesis.cellulose synthase	loc_os03g62090.1	Transcript	nearly identical (1577) AT5G64740 | Symbols: CESA6, IXR2, E112, PRC1 | CESA6 (CELLULOSE SYNTHASE 6); cellulose synthase/ transferase, transferring glycosyl groups | chr5:25881555-25886333 FORWARDCellulose_synt protein|CESA5 - cellulose synthase, expressed	-4.98874
10.2.1	cell wall.cellulose synthesis.cellulose synthase	loc_os07g10770.1	Transcript	nearly identical (1741) AT5G05170 | Symbols: CESA3, IXR1, ATCESA3, ATH-B, CEV1 | CEV1 (CONSTITUTIVE EXPRESSION OF VSP 1); cellulose synthase/ transferase, transferring glycosyl groups | chr5:1530401-1535090 REVERSECellulose_synt protein|CESA8 - cellulose synthase, expressed	-3.0184
10.2.1	cell wall.cellulose synthesis.cellulose synthase	loc_os10g32980.1	Transcript	highly similar to ( 879) AT5G44030 | Symbols: CESA4, IRX5, NWS2 | CESA4 (CELLULOSE SYNTHASE A4); cellulose synthase/ transferase, transferring glycosyl groups | chr5:17714713-17719564 FORWARDCellulose_synt protein|CESA7 - cellulose synthase, expressed	-7.83506
10.2.1	cell wall.cellulose synthesis.cellulose synthase	loc_os07g14850.1	Transcript	nearly identical (1542) AT5G64740 | Symbols: CESA6, IXR2, E112, PRC1 | CESA6 (CELLULOSE SYNTHASE 6); cellulose synthase/ transferase, transferring glycosyl groups | chr5:25881555-25886333 FORWARDCellulose_synt protein|CESA6 - cellulose synthase, expressed	-4.46515
10.2.2	cell wall.cellulose synthesis.COBRA	loc_os03g18910.1	Transcript	highly similar to ( 665) AT4G16120 | Symbols: ATSEB1, COBL7, SEB1 | COBL7 (COBRA-LIKE 7) | chr4:9116591-9119138 REVERSEweakly similar to ( 150) COBL1_ORYSA COBRA-like 1 protein precursor (BRITTLE CULM1-like 6 protein) - Oryza sativa (Rice)Phytochel_synth protein|COBRA-like protein 7 precursor, putative, expressed	-5.71656
10.2.2	cell wall.cellulose synthesis.COBRA	loc_os03g54750.1	Transcript	moderately similar to ( 402) AT5G60920 | Symbols: COB | COB (COBRA) | chr5:24511466-24513932 REVERSEmoderately similar to ( 461) COBL3_ORYSA COBRA-like 3 protein precursor (BRITTLE CULM1-like 4 protein) - Oryza sativa (Rice)Phytochel_synth protein|COBRA-like 3 protein precursor, putative, expressed	-3.78708
10.2.2	cell wall.cellulose synthesis.COBRA	loc_os07g41310.1	Transcript	highly similar to ( 667) AT5G60920 | Symbols: COB | COB (COBRA) | chr5:24511466-24513932 REVERSEhighly similar to ( 911) COBL1_ORYSA COBRA-like 1 protein precursor (BRITTLE CULM1-like 6 protein) - Oryza sativa (Rice)Phytochel_synth protein|COBRA, putative, expressed	-5.55068
10.2.2	cell wall.cellulose synthesis.COBRA	loc_os10g35460.1	Transcript	highly similar to ( 520) AT5G60920 | Symbols: COB | COB (COBRA) | chr5:24511466-24513932 REVERSEhighly similar to ( 842) COBL4_ORYSA COBRA-like 4 protein precursor (BRITTLE CULM1-like 9 protein) - Oryza sativa (Rice)Phytochel_synth protein|COBRA, putative, expressed	-5.73548
10.3	cell wall.hemicellulose synthesis	loc_os12g41956.1	Transcript	highly similar to ( 734) AT4G21060 | Symbols: | galactosyltransferase family protein | chr4:11242003-11244860 FORWARD Galactosyl_T Gal-bind_lectin protein|galactosyltransferase family protein, putative, expressed	1.6516
10.3	cell wall.hemicellulose synthesis	loc_os03g58900.1	Transcript	highly similar to ( 684) AT5G62620 | Symbols: | galactosyltransferase family protein | chr5:25137136-25139433 FORWARD Galactosyl_T Gal-bind_lectin protein|galactosyltransferase family protein, putative, expressed	-5.04487
10.3	cell wall.hemicellulose synthesis	loc_os04g37650.1	Transcript	moderately similar to ( 444) AT1G14070 | Symbols: FUT7 | FUT7; fucosyltransferase/ transferase, transferring glycosyl groups | chr1:4818548-4820150 FORWARDmoderately similar to ( 457) FUT1_PEA Galactoside 2-alpha-L-fucosyltransferase (EC 2.4.1.69) (Xyloglucan alpha-(1,2)-fucosyltransferase) (PsFT1) - Pisum sativum (Garden pea)XG_FTase protein|xyloglucan fucosyltransferase, putative, expressed	-4.58544
10.5	cell wall.cell wall proteins	loc_os04g31340.1	Transcript	moderately similar to ( 499) AT3G48530 | Symbols: KING1 | KING1 (SNF1-RELATED PROTEIN KINASE REGULATORY SUBUNIT GAMMA 1) | chr3:17987559-17989592 FORWARD CBS_pair_29 protein|CBS domain containing membrane protein, putative, expressed	4.4948
10.5.1.1	cell wall.cell wall proteins.AGPs.AGP	loc_os03g57460.1	Transcript	highly similar to ( 508) AT2G35860 | Symbols: FLA16 | FLA16 (FASCICLIN-LIKE ARABINOGALACTAN PROTEIN 16 PRECURSOR) | chr2:15059859-15061810 FORWARD Fasciclin protein|fasciclin domain containing protein, expressed	-5.24841
10.5.1.1	cell wall.cell wall proteins.AGPs.AGP	loc_os07g06680.1	Transcript	moderately similar to ( 482) AT2G35860 | Symbols: FLA16 | FLA16 (FASCICLIN-LIKE ARABINOGALACTAN PROTEIN 16 PRECURSOR) | chr2:15059859-15061810 FORWARD Fasciclin protein|fasciclin domain containing protein, expressed	-6.66724
10.5.1.1	cell wall.cell wall proteins.AGPs.AGP	loc_os03g03600.1	Transcript	moderately similar to ( 285) AT2G45470 | Symbols: FLA8, AGP8 | FLA8 (FASCICLIN-LIKE ARABINOGALACTAN PROTEIN 8) | chr2:18742797-18744059 REVERSE protein|fasciclin-like arabinogalactan protein, putative, expressed	-5.64434
10.5.1.1	cell wall.cell wall proteins.AGPs.AGP	loc_os05g48900.1	Transcript	weakly similar to ( 140) AT5G44130 | Symbols: FLA13 | FLA13 (FASCICLIN-LIKE ARABINOGALACTAN PROTEIN 13 PRECURSOR) | chr5:17761128-17761871 FORWARD protein|fasciclin domain containing protein, expressed	-6.68898
10.5.1.1	cell wall.cell wall proteins.AGPs.AGP	loc_os09g07350.1	Transcript	moderately similar to ( 274) AT4G12730 | Symbols: FLA2 | FLA2 (FASCICLIN-LIKE ARABINOGALACTAN 2) | chr4:7491598-7492809 REVERSE protein|fasciclin-like arabinogalactan protein 8 precursor, putative, expressed	-11.328
10.5.1.1	cell wall.cell wall proteins.AGPs.AGP	loc_os01g06580.1	Transcript	weakly similar to ( 178) AT5G03170 | Symbols: FLA11 | FLA11 | chr5:752898-753638 REVERSE protein|fasciclin domain containing protein, expressed	-9.53131
10.5.3	cell wall.cell wall proteins.LRR	loc_os07g07990.1	Transcript	moderately similar to ( 370) AT3G24480 | Symbols: | leucine-rich repeat family protein / extensin family protein | chr3:8901154-8902638 REVERSEweakly similar to ( 109) RPK1_IPONI Receptor-like protein kinase precursor (EC 2.7.11.1) - Ipomoea nil (Japanese morning glory) (Pharbitis nil) protein|uncharacterized protein At4g06744 precursor, putative, expressed	-3.86975
10.5.3	cell wall.cell wall proteins.LRR	loc_os02g04540.1	Transcript	moderately similar to ( 391) AT1G62440 | Symbols: LRX2 | LRX2 (LEUCINE-RICH REPEAT/EXTENSIN 2); protein binding / structural constituent of cell wall | chr1:23111818-23115293 FORWARDweakly similar to ( 115) RPK1_IPONI Receptor-like protein kinase precursor (EC 2.7.11.1) - Ipomoea nil (Japanese morning glory) (Pharbitis nil) protein|retrotransposon protein, putative, unclassified, expressed	-2.93337
10.5.3	cell wall.cell wall proteins.LRR	loc_os03g43650.1	Transcript	moderately similar to ( 317) AT4G18670 | Symbols: | protein binding / structural constituent of cell wall | chr4:10275918-10278491 REVERSEvery weakly similar to (91.3) RPK1_IPONI Receptor-like protein kinase precursor (EC 2.7.11.1) - Ipomoea nil (Japanese morning glory) (Pharbitis nil) protein|uncharacterized protein At4g06744 precursor, putative, expressed	-2.93908
10.5.3	cell wall.cell wall proteins.LRR	loc_os05g08770.1	Transcript	moderately similar to ( 382) AT3G24480 | Symbols: | leucine-rich repeat family protein / extensin family protein | chr3:8901154-8902638 REVERSEweakly similar to ( 112) RPK1_IPONI Receptor-like protein kinase precursor (EC 2.7.11.1) - Ipomoea nil (Japanese morning glory) (Pharbitis nil) protein|uncharacterized protein At4g06744 precursor, putative, expressed	-7.64484
10.5.4	cell wall.cell wall proteins.HRGP	loc_os03g58070.1	Transcript	moderately similar to ( 329) AT3G22440 | Symbols: | hydroxyproline-rich glycoprotein family protein | chr3:7959854-7961886 FORWARDFrigida protein|frigida, putative, expressed	3.9168
10.5.4	cell wall.cell wall proteins.HRGP	loc_os05g48760.1	Transcript	weakly similar to ( 104) AT4G28300 | Symbols: | hydroxyproline-rich glycoprotein family protein | chr4:14015414-14016823 FORWARD protein|protein of unknown function DUF1421 domain containing protein, expressed	-1.89315
10.5.4	cell wall.cell wall proteins.HRGP	loc_os09g07380.1	Transcript	moderately similar to ( 461) AT5G48385 | Symbols: | FUNCTIONS IN: molecular_function unknown; INVOLVED IN: biological_process unknown; LOCATED IN: cellular_component unknown; CONTAINS InterPro DOMAIN/s: Frigida-like (InterPro:IPR012474); BEST Arabidopsis thaliana protein match is: hydroxyproline-rich glycoprotein family protein (TAIR:AT3G22440.1); Has 987 Blast hits to 921 proteins in 78 species:…	3.43338
10.5.4	cell wall.cell wall proteins.HRGP	loc_os07g07680.1	Transcript	moderately similar to ( 330) AT4G14900 | Symbols: | hydroxyproline-rich glycoprotein family protein | chr4:8521759-8523607 REVERSEFrigida protein|frigida, putative, expressed	3.59539
10.5.4	cell wall.cell wall proteins.HRGP	loc_os09g07360.1	Transcript	moderately similar to ( 449) AT5G48385 | Symbols: | FUNCTIONS IN: molecular_function unknown; INVOLVED IN: biological_process unknown; LOCATED IN: cellular_component unknown; CONTAINS InterPro DOMAIN/s: Frigida-like (InterPro:IPR012474); BEST Arabidopsis thaliana protein match is: hydroxyproline-rich glycoprotein family protein (TAIR:AT3G22440.1); Has 987 Blast hits to 921 proteins in 78 species:…	1.94125
10.5.5	cell wall.cell wall proteins.RGP	loc_os04g56520.1	Transcript	moderately similar to ( 453) AT5G16510 | Symbols: | reversibly glycosylated polypeptide, putative | chr5:5393296-5394342 FORWARDmoderately similar to ( 335) UPTG_PEA Alpha-1,4-glucan-protein synthase [UDP-forming] (EC 2.4.1.112) (UDP-glucose:protein transglucosylase) (UPTG) (Reversibly glycosylated polypeptide) - Pisum sativum (Garden pea)RGP protein|alpha-1,4-glucan-protein synthase, putative, e…	3.69996
10.6.2	cell wall.degradation.mannan-xylose-arabinose-fucose	loc_os11g18730.1	Transcript	highly similar to ( 819) AT1G78060 | Symbols: | glycosyl hydrolase family 3 protein | chr1:29349796-29352868 REVERSEmoderately similar to ( 373) XYNB_PRUPE Putative beta-D-xylosidase (EC 3.2.1.-) (PpAz152) (Fragment) - Prunus persica (Peach)Glyco_hydro_3_C Glyco_hydro_3 BglX protein|glycosyl hydrolase family 3 protein, putative, expressed	7.81345
10.6.2	cell wall.degradation.mannan-xylose-arabinose-fucose	loc_os06g20620.1	Transcript	moderately similar to ( 416) AT4G28320 | Symbols: | glycosyl hydrolase family 5 protein / cellulase family protein | chr4:14018293-14019972 REVERSECOG3934 protein|OsMan07 - Endo-Beta-Mannanase, expressed	1.74396
10.6.2	cell wall.degradation.mannan-xylose-arabinose-fucose	loc_os11g19210.1	Transcript	highly similar to ( 810) AT1G78060 | Symbols: | glycosyl hydrolase family 3 protein | chr1:29349796-29352868 REVERSEmoderately similar to ( 368) XYNB_PRUPE Putative beta-D-xylosidase (EC 3.2.1.-) (PpAz152) (Fragment) - Prunus persica (Peach)Glyco_hydro_3_C BglX Glyco_hydro_3 protein|beta-D-xylosidase, putative, expressed	-3.24841
10.6.2	cell wall.degradation.mannan-xylose-arabinose-fucose	loc_os04g54810.1	Transcript	nearly identical (1093) AT5G64570 | Symbols: XYL4, ATBXL4 | XYL4; hydrolase, hydrolyzing O-glycosyl compounds / xylan 1,4-beta-xylosidase | chr5:25810227-25813309 REVERSEmoderately similar to ( 469) XYNB_PRUPE Putative beta-D-xylosidase (EC 3.2.1.-) (PpAz152) (Fragment) - Prunus persica (Peach)BglX Glyco_hydro_3 Glyco_hydro_3_C protein|beta-D-xylosidase, putative, expressed	-9.60502
10.6.2	cell wall.degradation.mannan-xylose-arabinose-fucose	loc_os05g32530.1	Transcript	nearly identical (1372) AT1G09010 | Symbols: | glycoside hydrolase family 2 protein | chr1:2895259-2899287 REVERSEnearly identical (1425) EBM_LILLO Mannosylglycoprotein endo-beta-mannosidase (EC 3.2.1.152) (Endo-beta-mannosidase) [Contains: Mannosylglycoprotein endo-beta-mannosidase 31 kDa subunit; Mannosylglycoprotein endo-beta-mannosidase 28 kDa subunit; Mannosylglycoprotein endo- LacZ protein|…	1.35462
10.6.3	cell wall.degradation.pectate lyases and polygalacturonases	loc_os05g46520.1	Transcript	moderately similar to ( 283) AT1G80170 | Symbols: | polygalacturonase, putative / pectinase, putative | chr1:30153646-30155683 REVERSEmoderately similar to ( 249) PGLR_ACTCH Polygalacturonase precursor (EC 3.2.1.15) (PG) (Pectinase) - Actinidia chinensis (Kiwi) (Yangtao)Glyco_hydro_28 PGU1 protein|polygalacturonase, putative, expressed	7.39613
10.6.3	cell wall.degradation.pectate lyases and polygalacturonases	loc_os05g01380.1	Transcript	weakly similar to ( 169) AT5G06860 | Symbols: PGIP1, ATPGIP1 | PGIP1 (POLYGALACTURONASE INHIBITING PROTEIN 1); protein binding | chr5:2132373-2133434 FORWARDweakly similar to ( 140) PGIP1_PHAVU Polygalacturonase inhibitor 1 precursor (Polygalacturonase-inhibiting protein) (PGIP-1) - Phaseolus vulgaris (Kidney bean) (French bean) protein|polygalacturonase inhibitor precursor, putative, expressed	6.37456
10.6.3	cell wall.degradation.pectate lyases and polygalacturonases	loc_os05g20020.1	Transcript	highly similar to ( 536) AT1G48100 | Symbols: | glycoside hydrolase family 28 protein / polygalacturonase (pectinase) family protein | chr1:17766921-17769625 FORWARDmoderately similar to ( 264) PGLR_ACTCH Polygalacturonase precursor (EC 3.2.1.15) (PG) (Pectinase) - Actinidia chinensis (Kiwi) (Yangtao)Glyco_hydro_28 PGU1 protein|polygalacturonase, putative, expressed	-10.2948
10.6.3	cell wall.degradation.pectate lyases and polygalacturonases	loc_os07g38130.1	Transcript	moderately similar to ( 211) AT5G06860 | Symbols: PGIP1, ATPGIP1 | PGIP1 (POLYGALACTURONASE INHIBITING PROTEIN 1); protein binding | chr5:2132373-2133434 FORWARDhighly similar to ( 610) PGIP1_ORYSA Polygalacturonase inhibitor 1 precursor (Polygalacturonase-inhibiting protein) (Floral organ regulator 1) - Oryza sativa (Rice) protein|polygalacturonase inhibitor 1 precursor, putative, expressed	4.38909
10.6.3	cell wall.degradation.pectate lyases and polygalacturonases	loc_os10g26940.1	Transcript	moderately similar to ( 236) AT1G70370 | Symbols: | BURP domain-containing protein / polygalacturonase, putative | chr1:26513003-26514998 REVERSEBURP protein|BURP domain containing protein, expressed	6.97884
10.6.3	cell wall.degradation.pectate lyases and polygalacturonases	loc_os07g14160.1	Transcript	highly similar to ( 582) AT3G62110 | Symbols: | glycoside hydrolase family 28 protein / polygalacturonase (pectinase) family protein | chr3:22997313-22999503 REVERSEweakly similar to ( 102) PGLR_ACTCH Polygalacturonase precursor (EC 3.2.1.15) (PG) (Pectinase) - Actinidia chinensis (Kiwi) (Yangtao)PGU1 Glyco_hydro_28 protein|polygalacturonase, putative, expressed	7.5987
10.6.3	cell wall.degradation.pectate lyases and polygalacturonases	loc_os05g46510.1	Transcript	moderately similar to ( 381) AT1G80170 | Symbols: | polygalacturonase, putative / pectinase, putative | chr1:30153646-30155683 REVERSEmoderately similar to ( 343) PGLR_ACTCH Polygalacturonase precursor (EC 3.2.1.15) (PG) (Pectinase) - Actinidia chinensis (Kiwi) (Yangtao)Glyco_hydro_28 PGU1 protein|polygalacturonase, putative, expressed	4.39711
10.7	cell wall.modification	loc_os08g37930.1	Transcript	weakly similar to ( 105) AT4G30380 | Symbols: EXLB2 | EXLB2 (EXPANSIN-LIKE B2 PRECURSOR) | chr4:14860486-14860994 FORWARD protein|beta-expansin precursor, putative, expressed	2.03905
10.7	cell wall.modification	loc_os08g13920.1	Transcript	moderately similar to ( 273) AT5G57550 | Symbols: XTR3 | XTR3 (XYLOGLUCAN ENDOTRANSGLYCOSYLASE 3); hydrolase, acting on glycosyl bonds / xyloglucan:xyloglucosyl transferase | chr5:23305055-23306384 REVERSEhighly similar to ( 532) XTH8_ORYSA Xyloglucan endotransglycosylase/hydrolase protein 8 precursor (EC 2.4.1.207) (End-xyloglucan transferase) (OsXTH8) (OsXRT5) - Oryza sativa (Rice)GH16_XET Glyc…	-3.74616
10.7	cell wall.modification	loc_os01g60770.1	Transcript	moderately similar to ( 322) AT1G69530 | Symbols: ATEXPA1, EXP1, AT-EXP1, ATEXP1, ATHEXP ALPHA 1.2 | ATEXPA1 (ARABIDOPSIS THALIANA EXPANSIN A1) | chr1:26142034-26143200 FORWARDmoderately similar to ( 416) EXPA2_ORYSA Expansin-A2 precursor (OsEXPA2) (Alpha-expansin-2) (OsEXP2) (OsaEXPa1.23) (RiExB) (RiExC) - Oryza sativa (Rice)Pollen_allerg_1 DPBB_1 protein|expansin precursor, putative, expressed	4.49753
10.7	cell wall.modification	loc_os02g03550.1	Transcript	moderately similar to ( 370) AT1G32170 | Symbols: XTR4, XTH30 | XTR4 (XYLOGLUCAN ENDOTRANSGLYCOSYLASE 4); hydrolase, acting on glycosyl bonds / hydrolase, hydrolyzing O-glycosyl compounds / xyloglucan:xyloglucosyl transferase | chr1:11575434-11577776 FORWARDweakly similar to ( 183) XTH_TOBAC Probable xyloglucan endotransglucosylase/hydrolase protein precursor (EC 2.4.1.207) - Nicotiana tabacum (C…	2.58448
10.7	cell wall.modification	loc_os11g33270.1	Transcript	moderately similar to ( 465) AT5G13870 | Symbols: EXGT-A4 | EXGT-A4 (ENDOXYLOGLUCAN TRANSFERASE A4); hydrolase, acting on glycosyl bonds / hydrolase, hydrolyzing O-glycosyl compounds / xyloglucan:xyloglucosyl transferase | chr5:4475089-4476217 REVERSEhighly similar to ( 521) XTH_WHEAT Probable xyloglucan endotransglucosylase/hydrolase precursor (EC 2.4.1.207) - Triticum aestivum (Wheat)GH16_XET G…	-7.34033
10.7	cell wall.modification	loc_os06g50960.1	Transcript	weakly similar to ( 171) AT4G38400 | Symbols: ATEXLA2, EXPL2, ATEXPL2, ATHEXP BETA 2.2 | ATEXLA2 (ARABIDOPSIS THALIANA EXPANSIN-LIKE A2) | chr4:17978675-17979665 REVERSEhighly similar to ( 553) EXLA4_ORYSA Expansin-like A4 precursor (OsEXLA4) (OsEXPL4) - Oryza sativa (Rice) protein|expansin precursor, putative, expressed	-5.67291
10.7	cell wall.modification	loc_os03g04020.1	Transcript	moderately similar to ( 226) AT3G45970 | Symbols: ATEXLA1, EXPL1, ATEXPL1, ATHEXP BETA 2.1 | ATEXLA1 (ARABIDOPSIS THALIANA EXPANSIN-LIKE A1) | chr3:16896238-16897189 FORWARDmoderately similar to ( 414) EXLA1_ORYSA Expansin-like A1 precursor (OsEXLA1) (OsEXPL1) (OsaEXPb2.1) - Oryza sativa (Rice) protein|expansin precursor, putative, expressed	4.33172
10.7	cell wall.modification	loc_os05g39990.1	Transcript	moderately similar to ( 325) AT2G40610 | Symbols: ATEXPA8, EXP8, ATEXP8, ATHEXP ALPHA 1.11 | ATEXPA8 (ARABIDOPSIS THALIANA EXPANSIN A8) | chr2:16949121-16950472 REVERSEmoderately similar to ( 442) EXPA4_ORYSA Expansin-A4 precursor (OsEXPA4) (Alpha-expansin-4) (OsEXP4) (OsaEXPa1.22) - Oryza sativa (Rice)Pollen_allerg_1 DPBB_1 protein|expansin precursor, putative, expressed	5.95826
10.7	cell wall.modification	loc_os07g29750.1	Transcript	moderately similar to ( 363) AT2G36870 | Symbols: | xyloglucan:xyloglucosyl transferase, putative / xyloglucan endotransglycosylase, putative / endo-xyloglucan transferase, putative | chr2:15472869-15474630 REVERSEmoderately similar to ( 210) XTH_TOBAC Probable xyloglucan endotransglucosylase/hydrolase protein precursor (EC 2.4.1.207) - Nicotiana tabacum (Common tobacco)GH16_XET Glyco_hydro_16 Gl…	7.33848
10.7	cell wall.modification	loc_os06g22919.2	Transcript	moderately similar to ( 267) AT4G28850 | Symbols: | xyloglucan:xyloglucosyl transferase, putative / xyloglucan endotransglycosylase, putative / endo-xyloglucan transferase, putative | chr4:14244336-14245781 FORWARDmoderately similar to ( 231) BRU1_SOYBN Brassinosteroid-regulated protein BRU1 precursor - Glycine max (Soybean)GH16_XET Glyco_hydro_16 Glyco_hydrolase_16 GH16_GPI_glucanosyltransferase…	8.09767
10.7	cell wall.modification	loc_os04g49410.1	Transcript	moderately similar to ( 337) AT3G03220 | Symbols: ATEXPA13, EXP13, ATEXP13, ATHEXP ALPHA 1.22 | ATEXPA13 (ARABIDOPSIS THALIANA EXPANSIN A13) | chr3:742655-743975 REVERSEmoderately similar to ( 500) EXP10_ORYSA Expansin-A10 precursor (OsEXPA10) (Alpha-expansin-10) (OsEXP10) (OsaEXPa1.28) - Oryza sativa (Rice)Pollen_allerg_1 protein|expansin precursor, putative, expressed	2.43248
10.7	cell wall.modification	loc_os10g40730.1	Transcript	moderately similar to ( 206) AT1G65680 | Symbols: ATEXPB2, EXPB2, ATHEXP BETA 1.4 | ATEXPB2 (ARABIDOPSIS THALIANA EXPANSIN B2) | chr1:24427266-24428399 FORWARDhighly similar to ( 527) EXPB4_ORYSA Expansin-B4 precursor (OsEXPB4) (Beta-expansin-4) (OsaEXPb1.7) - Oryza sativa (Rice)Pollen_allerg_1 protein|expansin precursor, putative, expressed	3.24596
10.7	cell wall.modification	loc_os10g42670.1	Transcript	moderately similar to ( 294) AT1G32170 | Symbols: XTR4, XTH30 | XTR4 (XYLOGLUCAN ENDOTRANSGLYCOSYLASE 4); hydrolase, acting on glycosyl bonds / hydrolase, hydrolyzing O-glycosyl compounds / xyloglucan:xyloglucosyl transferase | chr1:11575434-11577776 FORWARDweakly similar to ( 157) XTHA_PHAAN Xyloglucan endotransglucosylase/hydrolase protein A precursor (EC 2.4.1.207) (VaXTH1) - Phaseolus angular…	-1.2871
10.7	cell wall.modification	loc_os06g48200.1	Transcript	moderately similar to ( 395) AT5G57550 | Symbols: XTR3 | XTR3 (XYLOGLUCAN ENDOTRANSGLYCOSYLASE 3); hydrolase, acting on glycosyl bonds / xyloglucan:xyloglucosyl transferase | chr5:23305055-23306384 REVERSEmoderately similar to ( 358) BRU1_SOYBN Brassinosteroid-regulated protein BRU1 precursor - Glycine max (Soybean)GH16_XET Glyco_hydro_16 Glyco_hydrolase_16 GH16_GPI_glucanosyltransferase protein|…	-2.4136
10.7	cell wall.modification	loc_os06g48160.1	Transcript	moderately similar to ( 385) AT5G57560 | Symbols: TCH4, XTH22 | TCH4 (Touch 4); hydrolase, acting on glycosyl bonds / xyloglucan:xyloglucosyl transferase | chr5:23307296-23308235 REVERSEmoderately similar to ( 358) BRU1_SOYBN Brassinosteroid-regulated protein BRU1 precursor - Glycine max (Soybean)GH16_XET Glyco_hydro_16 Glyco_hydrolase_16 GH16_GPI_glucanosyltransferase GH16_lichenase protein|glyc…	-9.3314
10.7	cell wall.modification	loc_os04g51460.1	Transcript	moderately similar to ( 286) AT4G30270 | Symbols: MERI5B, MERI-5, SEN4 | MERI5B (meristem-5); hydrolase, acting on glycosyl bonds / xyloglucan:xyloglucosyl transferase | chr4:14819445-14820448 REVERSEmoderately similar to ( 277) BRU1_SOYBN Brassinosteroid-regulated protein BRU1 precursor - Glycine max (Soybean)GH16_XET Glyco_hydro_16 Glyco_hydrolase_16 GH16_GPI_glucanosyltransferase protein|glyco…	-9.31487
10.8.1	cell wall.pectin*esterases.PME	loc_os01g57854.1	Transcript	moderately similar to ( 459) AT1G11580 | Symbols: ATPMEPCRA, PMEPCRA | PMEPCRA (METHYLESTERASE PCR A); enzyme inhibitor/ pectinesterase | chr1:3888730-3890649 FORWARDmoderately similar to ( 384) PME2_CITSI Pectinesterase-2 precursor (EC 3.1.1.11) (Pectin methylesterase) (PE) - Citrus sinensis (Sweet orange)Pectinesterase PemB PMEI protein|pectinesterase, putative, expressed	1.73649
10.8.2	cell wall.pectin*esterases.acetyl esterase	loc_os01g66850.1	Transcript	moderately similar to ( 387) AT3G62060 | Symbols: | pectinacetylesterase family protein | chr3:22980123-22982734 FORWARD PAE protein|pectinacetylesterase domain containing protein, expressed	-6.02285
10.8.2	cell wall.pectin*esterases.acetyl esterase	loc_os04g51340.1	Transcript	moderately similar to ( 489) AT4G19410 | Symbols: | pectinacetylesterase, putative | chr4:10582188-10584766 REVERSE PAE protein|pectinacetylesterase domain containing protein, expressed	-7.82421
10.8.2	cell wall.pectin*esterases.acetyl esterase	loc_os01g66840.1	Transcript	moderately similar to ( 379) AT3G09410 | Symbols: | pectinacetylesterase family protein | chr3:2898243-2900984 REVERSE PAE protein|pectinacetylesterase domain containing protein, expressed	-1.84001
10.8.2	cell wall.pectin*esterases.acetyl esterase	loc_os01g74330.1	Transcript	moderately similar to ( 453) AT3G09410 | Symbols: | pectinacetylesterase family protein | chr3:2898243-2900984 REVERSE PAE protein|pectinacetylesterase domain containing protein, expressed	1.87399
11.1.1.1	lipid metabolism.FA synthesis and FA elongation.Acetyl CoA Carboxylation.homomeric Enzyme	loc_os05g22940.1	Transcript	nearly identical (3071) AT1G36160 | Symbols: ACC1, AT-ACC1, EMB22, GK, PAS3 | ACC1 (ACETYL-COENZYME A CARBOXYLASE 1); acetyl-CoA carboxylase | chr1:13534196-13543773 FORWARDmoderately similar to ( 226) MCCA_ORYSA Methylcrotonoyl-CoA carboxylase subunit alpha, mitochondrial precursor (EC 6.4.1.4) (3-methylcrotonyl-CoA carboxylase 1) (MCCase subunit alpha) (3-methylcrotonyl-CoA:carbon dioxide ligas…	1.41977
11.1.2	lipid metabolism.FA synthesis and FA elongation.Acetyl CoA Transacylase	loc_os03g18590.1	Transcript	moderately similar to ( 497) AT2G30200 | Symbols: | binding / catalytic/ transferase | chr2:12883340-12885482 REVERSE FabD COG3321 Acyl_transf_1 protein|malonyl CoA-acyl carrier protein transacylase, mitochondrial precursor, putative, expressed	1.1294
11.1.3	lipid metabolism.FA synthesis and FA elongation.ketoacyl ACP synthase	loc_os04g55060.1	Transcript	moderately similar to ( 460) AT1G62640 | Symbols: KAS III | KAS III (3-KETOACYL-ACYL CARRIER PROTEIN SYNTHASE III); 3-oxoacyl-[acyl-carrier-protein] synthase/ catalytic/ transferase, transferring acyl groups other than amino-acyl groups | chr1:23192502-23194737 FORWARDmoderately similar to ( 452) FABH_SPIOL 3-oxoacyl-[acyl-carrier-protein] synthase III, chloroplast precursor (EC 2.3.1.41) (Beta-k…	1.31045
11.1.3	lipid metabolism.FA synthesis and FA elongation.ketoacyl ACP synthase	loc_os06g09630.1	Transcript	highly similar to ( 712) AT5G46290 | Symbols: KAS I | KAS I (3-KETOACYL-ACYL CARRIER PROTEIN SYNTHASE I); catalytic/ fatty-acid synthase | chr5:18774439-18776629 REVERSEhighly similar to ( 741) KASC1_HORVU 3-oxoacyl-[acyl-carrier-protein] synthase I, chloroplast precursor (EC 2.3.1.41) (Beta-ketoacyl-ACP synthase I) (KAS I) - Hordeum vulgare (Barley) KAS_I_II PRK06333 PRK07314 FabB PRK08722 PRK08…	1.06006
11.1.5	lipid metabolism.FA synthesis and FA elongation.beta hydroxyacyl ACP dehydratase	loc_os05g36000.1	Transcript	moderately similar to ( 274) AT5G10160 | Symbols: | beta-hydroxyacyl-ACP dehydratase, putative | chr5:3185819-3187159 FORWARDfabZ FabZ FabA FabA_FabZ FabA protein|FabA-like domain containing protein, expressed	4.61423
11.1.7	lipid metabolism.FA synthesis and FA elongation.ACP thioesterase	loc_os06g05130.1	Transcript	moderately similar to ( 497) AT1G08510 | Symbols: FATB | FATB (fatty acyl-ACP thioesterases B); acyl carrier/ acyl-[acyl-carrier-protein] hydrolase | chr1:2691546-2693409 REVERSEmoderately similar to ( 496) FATB_GOSHI Myristoyl-acyl carrier protein thioesterase, chloroplast precursor (EC 3.1.2.-) (16:0-acyl-carrier protein thioesterase) (16:0-ACP thioesterase) (Acyl-[acyl-carrier-protein] hydrola…	-8.67555
11.1.8	lipid metabolism.FA synthesis and FA elongation.acyl coa ligase	loc_os02g02700.1	Transcript	highly similar to ( 680) AT1G20560 | Symbols: AAE1 | AAE1 (ACYL ACTIVATING ENZYME 1); AMP binding | chr1:7119927-7121363 REVERSEweakly similar to ( 151) 4CL2_ORYSA 4-coumarate--CoA ligase 2 (EC 6.2.1.12) (4CL 2) (4-coumaroyl-CoA synthase 2) - Oryza sativa (Rice) PRK08162 CaiC PRK07771 PRK07008 PRK08316 PRK08315 PRK06219 PRK06018 PRK07770 AMP-binding PRK12583 PRK03640 PRK06368 PRK06839 PRK07786 PR…	3.44578
11.1.8	lipid metabolism.FA synthesis and FA elongation.acyl coa ligase	loc_os03g19250.1	Transcript	highly similar to ( 842) AT3G16910 | Symbols: AAE7, ACN1 | AAE7 (ACYL-ACTIVATING ENZYME 7); AMP binding / acetate-CoA ligase | chr3:5773231-5775411 REVERSEweakly similar to ( 131) 4CL1_TOBAC 4-coumarate--CoA ligase 1 (EC 6.2.1.12) (4CL 1) (4-coumaroyl-CoA synthase 1) - Nicotiana tabacum (Common tobacco) PRK08162 CaiC PRK06219 PRK07008 PRK07771 PRK08316 PRK06018 AMP-binding PRK03640 PRK07770 PRK06…	4.17537
11.1.8	lipid metabolism.FA synthesis and FA elongation.acyl coa ligase	loc_os04g57850.1	Transcript	highly similar to ( 703) AT5G16370 | Symbols: AAE5 | AAE5 (ACYL ACTIVATING ENZYME 5); catalytic | chr5:5356823-5358481 REVERSEweakly similar to ( 155) 4CL1_TOBAC 4-coumarate--CoA ligase 1 (EC 6.2.1.12) (4CL 1) (4-coumaroyl-CoA synthase 1) - Nicotiana tabacum (Common tobacco) PRK08162 CaiC PRK08316 PRK06219 AMP-binding PRK07771 PRK06187 PRK07008 Acs PRK06368 PRK06087 PRK08315 PRK06018 PRK08314 PRK…	3.5976
11.1.8	lipid metabolism.FA synthesis and FA elongation.acyl coa ligase	loc_os03g04130.1	Transcript	highly similar to ( 645) AT1G20560 | Symbols: AAE1 | AAE1 (ACYL ACTIVATING ENZYME 1); AMP binding | chr1:7119927-7121363 REVERSEweakly similar to ( 127) 4CL2_ORYSA 4-coumarate--CoA ligase 2 (EC 6.2.1.12) (4CL 2) (4-coumaroyl-CoA synthase 2) - Oryza sativa (Rice) PRK08162 CaiC PRK08316 PRK07771 PRK07008 PRK06219 PRK06368 AMP-binding PRK08315 PRK07770 PRK03640 PRK06187 PRK06018 PRK07684 PRK12583 PR…	2.11932
11.1.8	lipid metabolism.FA synthesis and FA elongation.acyl coa ligase	loc_os03g19240.1	Transcript	highly similar to ( 885) AT3G16910 | Symbols: AAE7, ACN1 | AAE7 (ACYL-ACTIVATING ENZYME 7); AMP binding / acetate-CoA ligase | chr3:5773231-5775411 REVERSEweakly similar to ( 152) 4CL1_TOBAC 4-coumarate--CoA ligase 1 (EC 6.2.1.12) (4CL 1) (4-coumaroyl-CoA synthase 1) - Nicotiana tabacum (Common tobacco) PRK08162 CaiC PRK06219 PRK08316 PRK07771 PRK07008 PRK06018 AMP-binding PRK06368 PRK06187 PRK07…	-3.44852
11.1.8	lipid metabolism.FA synthesis and FA elongation.acyl coa ligase	loc_os04g58710.1	Transcript	highly similar to ( 650) AT3G48990 | Symbols: | AMP-dependent synthetase and ligase family protein | chr3:18159031-18161294 REVERSEweakly similar to ( 151) 4CL1_TOBAC 4-coumarate--CoA ligase 1 (EC 6.2.1.12) (4CL 1) (4-coumaroyl-CoA synthase 1) - Nicotiana tabacum (Common tobacco) CaiC PRK05852 PRK08315 AMP-binding PRK07514 PRK07656 PRK08316 PRK05605 PRK03640 PRK06187 Acs PRK08314 PRK12583 PRK0683…	-4.31788
11.1.8	lipid metabolism.FA synthesis and FA elongation.acyl coa ligase	loc_os04g33190.1	Transcript	nearly identical (1163) AT5G36880 | Symbols: | acetyl-CoA synthetase, putative / acetate-CoA ligase, putative | chr5:14534961-14540296 REVERSEvery weakly similar to (97.8) 4CL1_TOBAC 4-coumarate--CoA ligase 1 (EC 6.2.1.12) (4CL 1) (4-coumaroyl-CoA synthase 1) - Nicotiana tabacum (Common tobacco) PRK01291 PRK02167 PRK02239 PRK03613 PRK04664 PRK03582 acsA PRK02530 PRK03429 PRK00851 PRK03914 Acs PRK…	-2.61549
11.1.8	lipid metabolism.FA synthesis and FA elongation.acyl coa ligase	loc_os01g55590.1	Transcript	highly similar to ( 701) AT3G16170 | Symbols: | acyl-activating enzyme 13 (AAE13) | chr3:5476490-5480128 FORWARDweakly similar to ( 139) 4CL2_ORYSA 4-coumarate--CoA ligase 2 (EC 6.2.1.12) (4CL 2) (4-coumaroyl-CoA synthase 2) - Oryza sativa (Rice) CaiC PRK07514 PRK07787 AMP-binding PRK07656 Acs PRK08316 PRK08314 PRK05605 PRK06178 FAA1 PRK07529 PRK06187 PRK06839 PRK07786 PRK07684 PRK08315 PRK12583 …	1.26604
11.1.9	lipid metabolism.FA synthesis and FA elongation.long chain fatty acid CoA ligase	loc_os12g07110.1	Transcript	nearly identical (1055) AT1G77590 | Symbols: LACS9 | LACS9 (LONG CHAIN ACYL-COA SYNTHETASE 9); long-chain-fatty-acid-CoA ligase | chr1:29148501-29151776 REVERSE FAA1 AMP-binding CaiC PRK03640 Acs PRK08314 PRK06087 PRK07656 PRK05605 PRK09089 PRK08633 PRK08180 EntF PRK07529 PRK06178 PRK06145 PRK09088 PRK06368 PRK12492 PRK07771 PRK08751 PRK06187 PRK06710 PRK05677 PRK07787 PRK07514 PRK09274 PRK06155 …	-2.07848
11.1.10	lipid metabolism.FA synthesis and FA elongation.beta ketoacyl CoA synthase	loc_os07g15190.1	Transcript	weakly similar to ( 131) AT2G26640 | Symbols: KCS11 | KCS11 (3-KETOACYL-COA SYNTHASE 11); acyltransferase/ catalytic/ transferase, transferring acyl groups other than amino-acyl groups | chr2:11330094-11331623 FORWARD protein|3-ketoacyl-CoA synthase 2, putative, expressed	3.52308
11.1.10	lipid metabolism.FA synthesis and FA elongation.beta ketoacyl CoA synthase	loc_os03g14170.1	Transcript	highly similar to ( 669) AT1G01120 | Symbols: KCS1 | KCS1 (3-KETOACYL-COA SYNTHASE 1); acyltransferase/ fatty acid elongase | chr1:57392-58978 REVERSEFAE1_CUT1_RppA CHS_like BcsA protein|3-ketoacyl-CoA synthase, putative, expressed	-1.03489
11.1.10	lipid metabolism.FA synthesis and FA elongation.beta ketoacyl CoA synthase	loc_os03g12030.1	Transcript	highly similar to ( 808) AT1G68530 | Symbols: CUT1, POP1, CER6, G2, KCS6 | KCS6 (3-KETOACYL-COA SYNTHASE 6); catalytic/ transferase, transferring acyl groups other than amino-acyl groups | chr1:25713600-25714733 REVERSEFAE1_CUT1_RppA CHS_like BcsA FabH KAS_III init_cond_enzymes protein|3-ketoacyl-CoA synthase, putative, expressed	-1.29429
11.1.12	lipid metabolism.FA synthesis and FA elongation.ACP protein	loc_os03g22950.1	Transcript	weakly similar to ( 142) AT1G65290 | Symbols: mtACP2 | mtACP2 (mitochondrial acyl carrier protein 2); acyl carrier/ metal ion binding | chr1:24249088-24250366 REVERSE protein|acyl carrier protein, putative, expressed	1.44502
11.1.13	lipid metabolism.FA synthesis and FA elongation.acyl-CoA binding protein	loc_os08g06550.1	Transcript	weakly similar to ( 115) AT1G31812 | Symbols: ACBP6, ACBP | ACBP6 (acyl-CoA-binding protein 6); acyl-CoA binding / phosphatidylcholine binding | chr1:11411132-11412099 REVERSEweakly similar to ( 135) ACBP_RICCO Acyl-CoA-binding protein (ACBP) - Ricinus communis (Castor bean) ACBP ACBP protein|acyl CoA binding protein, putative, expressed	-2.97556
11.1.13	lipid metabolism.FA synthesis and FA elongation.acyl-CoA binding protein	loc_os04g58550.1	Transcript	moderately similar to ( 290) AT5G53470 | Symbols: ACBP1, ACBP | ACBP1 (ACYL-COA BINDING PROTEIN 1); acyl-CoA binding / lead ion binding | chr5:21710497-21712391 FORWARD ANK ACBP ACBP protein|acyl-CoA-binding domain-containing protein 6, putative, expressed	2.5899
11.1.15	lipid metabolism.FA synthesis and FA elongation.ACP desaturase	loc_os04g31070.1	Transcript	highly similar to ( 600) AT2G43710 | Symbols: SSI2, FAB2 | SSI2; acyl-[acyl-carrier-protein] desaturase/ stearoyl-CoA 9-desaturase | chr2:18120107-18122495 FORWARDhighly similar to ( 756) STAD_ORYSA Acyl-[acyl-carrier-protein] desaturase, chloroplast precursor (EC 1.14.19.2) (Stearoyl-ACP desaturase) - Oryza sativa (Rice)FA_desaturase_2 Acyl_ACP_Desat protein|acyl-desaturase, chloroplast precurso…	2.5014
11.1.15	lipid metabolism.FA synthesis and FA elongation.ACP desaturase	loc_os03g53010.1	Transcript	weakly similar to ( 152) AT2G43710 | Symbols: SSI2, FAB2 | SSI2; acyl-[acyl-carrier-protein] desaturase/ stearoyl-CoA 9-desaturase | chr2:18120107-18122495 FORWARDweakly similar to ( 157) STAD_ORYSA Acyl-[acyl-carrier-protein] desaturase, chloroplast precursor (EC 1.14.19.2) (Stearoyl-ACP desaturase) - Oryza sativa (Rice)FA_desaturase_2 Acyl_ACP_Desat protein|acyl-desaturase, chloroplast precurso…	-4.36971
11.1.15	lipid metabolism.FA synthesis and FA elongation.ACP desaturase	loc_os01g69080.1	Transcript	highly similar to ( 604) AT2G43710 | Symbols: SSI2, FAB2 | SSI2; acyl-[acyl-carrier-protein] desaturase/ stearoyl-CoA 9-desaturase | chr2:18120107-18122495 FORWARDhighly similar to ( 613) STAD_RICCO Acyl-[acyl-carrier-protein] desaturase, chloroplast precursor (EC 1.14.19.2) (Stearoyl-ACP desaturase) (Delta(9) stearoyl-acyl carrier protein desaturase) - Ricinus communis (Castor bean)FA_desaturase…	-4.6613
11.2.3	lipid metabolism.FA desaturation.omega 3 desaturase	loc_os03g18070.1	Transcript	highly similar to ( 534) AT3G11170 | Symbols: FAD7, FADD | FAD7 (FATTY ACID DESATURASE 7); omega-3 fatty acid desaturase | chr3:3499959-3502126 FORWARDhighly similar to ( 550) FAD3C_RICCO Omega-3 fatty acid desaturase, chloroplast precursor (EC 1.14.19.-) - Ricinus communis (Castor bean)Delta12-FADS-like FA_desaturase DesA protein|omega-3 fatty acid desaturase, chloroplast precursor, putative, ex…	-8.33991
11.2.3	lipid metabolism.FA desaturation.omega 3 desaturase	loc_os07g49310.1	Transcript	highly similar to ( 563) AT5G05580 | Symbols: FAD8 | FAD8 (FATTY ACID DESATURASE 8); omega-3 fatty acid desaturase | chr5:1664331-1666345 FORWARDhighly similar to ( 576) FAD3C_RICCO Omega-3 fatty acid desaturase, chloroplast precursor (EC 1.14.19.-) - Ricinus communis (Castor bean)Delta12-FADS-like FA_desaturase DesA protein|omega-3 fatty acid desaturase, chloroplast precursor, putative, expressed	-4.00048
11.2.3	lipid metabolism.FA desaturation.omega 3 desaturase	loc_os02g48560.1	Transcript	highly similar to ( 555) AT3G12120 | Symbols: FAD2 | FAD2 (FATTY ACID DESATURASE 2); delta12-fatty acid dehydrogenase/ omega-6 fatty acid desaturase | chr3:3860592-3861743 REVERSEhighly similar to ( 573) FD6E2_SOYBN Omega-6 fatty acid desaturase, endoplasmic reticulum isozyme 2 (EC 1.14.19.-) - Glycine max (Soybean)Delta12-FADS-like FA_desaturase DesA protein|fatty acid desaturase, putative, expr…	-5.7284
11.2.3	lipid metabolism.FA desaturation.omega 3 desaturase	loc_os02g48560.2	Transcript	highly similar to ( 551) AT3G12120 | Symbols: FAD2 | FAD2 (FATTY ACID DESATURASE 2); delta12-fatty acid dehydrogenase/ omega-6 fatty acid desaturase | chr3:3860592-3861743 REVERSEhighly similar to ( 568) FD6E2_SOYBN Omega-6 fatty acid desaturase, endoplasmic reticulum isozyme 2 (EC 1.14.19.-) - Glycine max (Soybean)Delta12-FADS-like FA_desaturase DesA protein|fatty acid desaturase, putative, expr…	-3.78184
11.2.4	lipid metabolism.FA desaturation.omega 6 desaturase	loc_os08g34220.1	Transcript	highly similar to ( 639) AT4G30950 | Symbols: FAD6, FADC, SFD4 | FAD6 (FATTY ACID DESATURASE 6); omega-6 fatty acid desaturase | chr4:15057278-15059673 REVERSEhighly similar to ( 651) FAD6C_BRANA Omega-6 fatty acid desaturase, chloroplast precursor (EC 1.14.19.-) - Brassica napus (Rape)Delta12-FADS-like FA_desaturase DesA Delta6-FADS-like protein|omega-6 fatty acid desaturase, chloroplast precurs…	-4.35938
11.2.4	lipid metabolism.FA desaturation.omega 6 desaturase	loc_os02g48560.1	Transcript	highly similar to ( 555) AT3G12120 | Symbols: FAD2 | FAD2 (FATTY ACID DESATURASE 2); delta12-fatty acid dehydrogenase/ omega-6 fatty acid desaturase | chr3:3860592-3861743 REVERSEhighly similar to ( 573) FD6E2_SOYBN Omega-6 fatty acid desaturase, endoplasmic reticulum isozyme 2 (EC 1.14.19.-) - Glycine max (Soybean)Delta12-FADS-like FA_desaturase DesA protein|fatty acid desaturase, putative, expr…	-5.7284
11.2.4	lipid metabolism.FA desaturation.omega 6 desaturase	loc_os02g48560.2	Transcript	highly similar to ( 551) AT3G12120 | Symbols: FAD2 | FAD2 (FATTY ACID DESATURASE 2); delta12-fatty acid dehydrogenase/ omega-6 fatty acid desaturase | chr3:3860592-3861743 REVERSEhighly similar to ( 568) FD6E2_SOYBN Omega-6 fatty acid desaturase, endoplasmic reticulum isozyme 2 (EC 1.14.19.-) - Glycine max (Soybean)Delta12-FADS-like FA_desaturase DesA protein|fatty acid desaturase, putative, expr…	-3.78184
11.3	lipid metabolism.Phospholipid synthesis	loc_os01g14900.1	Transcript	moderately similar to ( 287) AT1G06520 | Symbols: ATGPAT1, GPAT1 | GPAT1 (GLYCEROL-3-PHOSPHATE ACYLTRANSFERASE 1); 1-acylglycerol-3-phosphate O-acyltransferase/ acyltransferase | chr1:1994170-1996067 REVERSE protein|glycerol-3-phosphate acyltransferase, putative, expressed	4.90641
11.3	lipid metabolism.Phospholipid synthesis	loc_os01g50030.1	Transcript	highly similar to ( 832) AT3G18000 | Symbols: NMT1, XPL1, PEAMT | XPL1 (XIPOTL 1); methyltransferase/ phosphoethanolamine N-methyltransferase | chr3:6154578-6157331 FORWARDhighly similar to ( 832) PEAM1_ARATH Phosphoethanolamine N-methyltransferase 1 (EC 2.1.1.103) (PEAMT 1) (AtNMT1) - Arabidopsis thaliana (Mouse-ear cress) Cfa UbiE Methyltransf_11 PRK08317 protein|CPuORF25 - conserved peptide uO…	-2.34152
11.3	lipid metabolism.Phospholipid synthesis	loc_os03g17520.1	Transcript	moderately similar to ( 262) AT2G39290 | Symbols: PGPS1, PGP1, PGS1 | PGP1 (PHOSPHATIDYLGLYCEROLPHOSPHATE SYNTHASE 1); CDP-alcohol phosphatidyltransferase/ CDP-diacylglycerol-glycerol-3-phosphate 3-phosphatidyltransferase | chr2:16407274-16408840 FORWARD PRK10832 PgsA CDP-OH_P_transf protein|CDP-alcohol phosphatidyltransferase, putative, expressed	-2.87931
11.3	lipid metabolism.Phospholipid synthesis	loc_os05g38350.1	Transcript	moderately similar to ( 411) AT3G11430 | Symbols: ATGPAT5, GPAT5 | GPAT5 (GLYCEROL-3-PHOSPHATE ACYLTRANSFERASE 5); 1-acylglycerol-3-phosphate O-acyltransferase/ acyltransferase/ organic anion transmembrane transporter | chr3:3595911-3597678 FORWARD protein|glycerol-3-phosphate acyltransferase 8, putative, expressed	-2.08794
11.3	lipid metabolism.Phospholipid synthesis	loc_os02g02340.1	Transcript	moderately similar to ( 476) AT2G38110 | Symbols: ATGPAT6, GPAT6 | GPAT6 (GLYCEROL-3-PHOSPHATE ACYLTRANSFERASE 6); 1-acylglycerol-3-phosphate O-acyltransferase/ acyltransferase | chr2:15952816-15955364 REVERSE protein|glycerol-3-phosphate acyltransferase, putative, expressed	-2.87057
11.3	lipid metabolism.Phospholipid synthesis	loc_os01g63580.1	Transcript	highly similar to ( 700) AT2G38110 | Symbols: ATGPAT6, GPAT6 | GPAT6 (GLYCEROL-3-PHOSPHATE ACYLTRANSFERASE 6); 1-acylglycerol-3-phosphate O-acyltransferase/ acyltransferase | chr2:15952816-15955364 REVERSE protein|glycerol-3-phosphate acyltransferase, putative, expressed	-4.52404
11.3	lipid metabolism.Phospholipid synthesis	loc_os11g41900.1	Transcript	moderately similar to ( 464) AT3G57650 | Symbols: LPAT2 | LPAT2; 1-acylglycerol-3-phosphate O-acyltransferase | chr3:21349751-21352839 FORWARDhighly similar to ( 622) LPAT_MAIZE 1-acyl-sn-glycerol-3-phosphate acyltransferase PLS1 (EC 2.3.1.51) (Phospholipid synthesis protein 1) - Zea mays (Maize) protein|acyltransferase, putative, expressed	1.193
11.3.2	lipid metabolism.Phospholipid synthesis.choline kinase	loc_os01g51920.1	Transcript	moderately similar to ( 447) AT1G74320 | Symbols: | choline kinase, putative | chr1:27941192-27942903 FORWARD Choline_kinase protein|phosphotransferase, putative, expressed	-3.52747
11.3.2	lipid metabolism.Phospholipid synthesis.choline kinase	loc_os01g08760.1	Transcript	moderately similar to ( 429) AT1G71697 | Symbols: ATCK1, CK | ATCK1 (CHOLINE KINASE 1); choline kinase | chr1:26971537-26973177 FORWARD Choline_kinase protein|choline/ethanolamine kinase, putative, expressed	1.76506
11.3.3	lipid metabolism.Phospholipid synthesis.phosphatidate cytidylyltransferase	loc_os12g01480.1	Transcript	moderately similar to ( 258) AT5G58560 | Symbols: | phosphatidate cytidylyltransferase family protein | chr5:23670513-23672570 FORWARDmoderately similar to ( 302) PHYK2_ORYSA Probable phytol kinase 2, chloroplast precursor (EC 2.7.-.-) (Fragment) - Oryza sativa (Rice) protein|phosphatidate cytidylyltransferase, putative, expressed	2.24053
11.3.5	lipid metabolism.Phospholipid synthesis.diacylglycerol kinase	loc_os02g54650.1	Transcript	highly similar to ( 551) AT4G30340 | Symbols: ATDGK7 | ATDGK7 (Diacylglycerol kinase 7); diacylglycerol kinase | chr4:14838465-14840941 REVERSE DAGKa DAGKc DAGK_cat protein|diacylglycerol kinase, putative, expressed	-2.67061
11.3.5	lipid metabolism.Phospholipid synthesis.diacylglycerol kinase	loc_os08g08110.1	Transcript	highly similar to ( 649) AT2G20900 | Symbols: DGK5, ATDGK5 | diacylglycerol kinase, putative | chr2:8989412-8992798 REVERSE DAGKa DAGK_acc DAGK_cat DAGKc protein|diacylglycerol kinase, putative, expressed	-1.02948
11.3.6	lipid metabolism.Phospholipid synthesis.choline-phosphate cytidylyltransferase	loc_os08g12830.1	Transcript	highly similar to ( 518) AT2G38670 | Symbols: PECT1 | PECT1 (PHOSPHORYLETHANOLAMINE CYTIDYLYLTRANSFERASE 1); ethanolamine-phosphate cytidylyltransferase | chr2:16168979-16171680 FORWARD ECT CCT cytidylyltransferase TagD cytidylyltransferase_like RfaE_N protein|cytidylyltransferase domain containing protein, expressed	-3.2735
11.3.6	lipid metabolism.Phospholipid synthesis.choline-phosphate cytidylyltransferase	loc_os10g42790.1	Transcript	moderately similar to ( 400) AT4G15130 | Symbols: ATCCT2, CCT2 | catalytic/ choline-phosphate cytidylyltransferase/ nucleotidyltransferase | chr4:8637793-8639388 FORWARD CCT cytidylyltransferase TagD ECT cytidylyltransferase_like CTP_transf_2 protein|cytidylyltransferase domain containing protein, expressed	1.83948
11.3.6	lipid metabolism.Phospholipid synthesis.choline-phosphate cytidylyltransferase	loc_os02g07720.2	Transcript	moderately similar to ( 392) AT2G32260 | Symbols: ATCCT1, CCT1 | cholinephosphate cytidylyltransferase, putative / phosphorylcholine transferase, putative / CTP:phosphocholine cytidylyltransferase, putative | chr2:13697645-13700241 FORWARD CCT cytidylyltransferase ECT TagD cytidylyltransferase_like CTP_transf_2 protein|cytidylyltransferase domain containing protein, expressed	1.51825
11.3.6	lipid metabolism.Phospholipid synthesis.choline-phosphate cytidylyltransferase	loc_os10g24810.1	Transcript	highly similar to ( 512) AT2G38670 | Symbols: PECT1 | PECT1 (PHOSPHORYLETHANOLAMINE CYTIDYLYLTRANSFERASE 1); ethanolamine-phosphate cytidylyltransferase | chr2:16168979-16171680 FORWARD CCT ECT cytidylyltransferase TagD cytidylyltransferase_like RfaE_N protein|cytidylyltransferase domain containing protein, expressed	1.6231
11.3.8	lipid metabolism.Phospholipid synthesis.phosphatidylserine decarboxylase	loc_os03g01216.1	Transcript	moderately similar to ( 459) AT4G16700 | Symbols: PSD1 | PSD1 (phosphatidylserine decarboxylase 1); phosphatidylserine decarboxylase | chr4:9395815-9398261 REVERSE PRK03934 Psd PRK03140 PRK01734 PRK03481 PS_Dcarbxylase psd PRK04599 PRK04722 PRK09629 PRK00882 PRK00723 protein|phosphatidylserine decarboxylase, putative, expressed	1.58448
11.3.9	lipid metabolism.Phospholipid synthesis.choline monooxygenase	loc_os06g48510.1	Transcript	highly similar to ( 508) AT4G29890 | Symbols: | choline monooxygenase, putative (CMO-like) | chr4:14608868-14610905 FORWARDmoderately similar to ( 426) CHMO_BETVU Choline monooxygenase, chloroplast precursor (EC 1.14.15.7) - Beta vulgaris (Sugar beet)Rieske_RO_Alpha_CMO HcaE Rieske_RO_Alpha_N Rieske_RO_Alpha_AntDO Rieske_RO_Alpha_NDO protein|choline monooxygenase, chloroplast precursor, putative,…	3.45895
11.4	lipid metabolism.TAG synthesis	loc_os06g36800.1	Transcript	highly similar to ( 629) AT2G19450 | Symbols: TAG1, AS11, ABX45, DGAT1, RDS1, ATDGAT | TAG1 (TRIACYLGLYCEROL BIOSYNTHESIS DEFECT 1); diacylglycerol O-acyltransferase | chr2:8426436-8429455 FORWARD ARE1 MBOAT protein|O-acyltransferase, putative, expressed	2.12505
11.5.1	lipid metabolism.glyceral metabolism.glycerol kinase	loc_os04g55410.1	Transcript	highly similar to ( 804) AT1G80460 | Symbols: NHO1, GLI1 | NHO1 (nonhost resistance to P. s. phaseolicola 1); carbohydrate kinase/ glycerol kinase | chr1:30246960-30249055 REVERSE glpK GlpK XylB FGGY_N FGGY_C PRK10331 PRK10939 AraB protein|FGGY family of carbohydrate kinases, putative, expressed	2.26918
11.5.2	lipid metabolism.glyceral metabolism.Glycerol-3-phosphate dehydrogenase (NAD+)	loc_os05g41590.1	Transcript	highly similar to ( 732) AT2G41540 | Symbols: GPDHC1 | GPDHC1; NAD or NADH binding / glycerol-3-phosphate dehydrogenase (NAD+) | chr2:17326801-17328654 FORWARD GpsA NAD_Gly3P_dh_C gpsA protein|glycerol-3-phosphate dehydrogenase, putative, expressed	-5.01259
11.5.2	lipid metabolism.glyceral metabolism.Glycerol-3-phosphate dehydrogenase (NAD+)	loc_os07g12640.1	Transcript	moderately similar to ( 394) AT2G40690 | Symbols: GLY1, SFD1 | GLY1; glycerol-3-phosphate dehydrogenase (NAD+) | chr2:16974107-16976241 FORWARD gpsA GpsA PRK12439 NAD_Gly3P_dh_C protein|glycerol-3-phosphate dehydrogenase, putative, expressed	2.54384
11.6	lipid metabolism.lipid transfer proteins etc	loc_os11g02400.1	Transcript	very weakly similar to (82.8) AT5G59320 | Symbols: LTP3 | LTP3 (LIPID TRANSFER PROTEIN 3); lipid binding | chr5:23929051-23929492 FORWARDvery weakly similar to (92.8) NLTP3_HORVU Nonspecific lipid-transfer protein 3 precursor (LTP 3) (CW20) (CW-20) (CW-19) - Hordeum vulgare (Barley)nsLTP1 protein|LTPL8 - Protease inhibitor/seed storage/LTP family protein precursor, expressed	-3.02928
11.6	lipid metabolism.lipid transfer proteins etc	loc_os11g02424.2	Transcript	very weakly similar to (80.9) AT5G59320 | Symbols: LTP3 | LTP3 (LIPID TRANSFER PROTEIN 3); lipid binding | chr5:23929051-23929492 FORWARDvery weakly similar to (97.8) NLTP3_HORVU Nonspecific lipid-transfer protein 3 precursor (LTP 3) (CW20) (CW-20) (CW-19) - Hordeum vulgare (Barley)nsLTP1 protein|LTPL9 - Protease inhibitor/seed storage/LTP family protein precursor, expressed	-1.39763
11.7	lipid metabolism.unassigned	loc_os01g26039.1	Transcript	highly similar to ( 778) AT1G54570 | Symbols: | esterase/lipase/thioesterase family protein | chr1:20380649-20384953 REVERSE protein|expressed protein	-5.75981
11.7	lipid metabolism.unassigned	loc_os01g26000.1	Transcript	highly similar to ( 554) AT1G54570 | Symbols: | esterase/lipase/thioesterase family protein | chr1:20380649-20384953 REVERSE protein|expressed protein	3.58448
11.8	lipid metabolism.''exotics'' (steroids, squalene etc)	loc_os01g57570.1	Transcript	moderately similar to ( 281) AT5G54500 | Symbols: FQR1 | FQR1 (FLAVODOXIN-LIKE QUINONE REDUCTASE 1); FMN binding / oxidoreductase, acting on NADH or NADPH, quinone or similar compound as acceptor | chr5:22124674-22126256 FORWARD PRK03767 WrbA protein|NADPH-dependent FMN reductase domain containing protein, expressed	1.09129
11.8	lipid metabolism.''exotics'' (steroids, squalene etc)	loc_os11g30910.1	Transcript	moderately similar to ( 239) AT2G14920 | Symbols: ATST4A, ST4A | ST4A (SULFOTRANSFERASE 4A); brassinosteroid sulfotransferase/ sulfotransferase | chr2:6418199-6419236 FORWARD Sulfotransfer_1 protein|sulfotransferase domain containing protein, expressed	5.23879
11.8	lipid metabolism.''exotics'' (steroids, squalene etc)	loc_os12g43670.1	Transcript	weakly similar to ( 169) AT1G10030 | Symbols: ERG28 | ERG28 (Arabidopsis homolog of yeast ergosterol28) | chr1:3273972-3275631 FORWARD Erg28 protein|ergosterol biosynthetic protein 28, putative, expressed	1.61619
11.8	lipid metabolism.''exotics'' (steroids, squalene etc)	loc_os07g41460.1	Transcript	moderately similar to ( 225) AT2G03760 | Symbols: ST, ATST1, RAR047, ST1 | ST; brassinosteroid sulfotransferase/ sulfotransferase | chr2:1149475-1150455 REVERSE Sulfotransfer_1 protein|sulfotransferase domain containing protein, expressed	1.54296
11.8.1	lipid metabolism.''exotics'' (steroids, squalene etc).sphingolipids	loc_os02g56300.1	Transcript	highly similar to ( 665) AT4G36480 | Symbols: ATLCB1, LCB1, EMB2779, FBR11 | ATLCB1 (LONG-CHAIN BASE1); protein binding / serine C-palmitoyltransferase | chr4:17218598-17221124 FORWARD BioF PRK06939 PRK05958 PRK09064 PRK07179 PRK05937 Aminotran_1_2 PRK07505 protein|aminotransferase, classes I and II, domain containing protein, expressed	2.07407
11.8.1	lipid metabolism.''exotics'' (steroids, squalene etc).sphingolipids	loc_os02g49590.1	Transcript	moderately similar to ( 394) AT1G13580 | Symbols: LAG13 | LAG13 (LAG1 LONGEVITY ASSURANCE HOMOLOG 3) | chr1:4645006-4646765 REVERSEhighly similar to ( 546) ASCL2_ORYSA ASC1-like protein 2 (Alternaria stem canker resistance-like protein 2) - Oryza sativa (Rice) LAG1 TLC LAG1 protein|ASC1, putative, expressed	-2.43016
11.8.1	lipid metabolism.''exotics'' (steroids, squalene etc).sphingolipids	loc_os03g14800.4	Transcript	highly similar to ( 642) AT4G36480 | Symbols: ATLCB1, LCB1, EMB2779, FBR11 | ATLCB1 (LONG-CHAIN BASE1); protein binding / serine C-palmitoyltransferase | chr4:17218598-17221124 FORWARD BioF PRK06939 PRK05958 PRK09064 PRK07179 PRK07505 PRK05937 Aminotran_1_2 protein|serine palmitoyltransferase 1, putative, expressed	2.04683
11.8.1	lipid metabolism.''exotics'' (steroids, squalene etc).sphingolipids	loc_os02g47350.1	Transcript	moderately similar to ( 296) AT5G19200 | Symbols: | short-chain dehydrogenase/reductase (SDR) family protein | chr5:6458995-6460690 FORWARD DltE COG4221 fabG fabG fabG FabG PRK07109 fabG PRK12826 PRK12829 PRK09072 PRK07326 PRK06181 PRK12429 PRK07832 PRK08267 PRK06180 PRK05650 PRK07201 PRK06500 PRK05876 PRK07063 PRK07825 PRK12828 PRK06125 PRK05872 adh_short PRK07576 PRK07454 PRK07024 PRK12939 PRK0…	1.40162
11.8.1.2	lipid metabolism.''exotics'' (steroids, squalene etc).sphingolipids.serine C-palmitoyltransferase	loc_os11g31640.1	Transcript	highly similar to ( 845) AT5G23670 | Symbols: LCB2 | LCB2; protein binding / serine C-palmitoyltransferase | chr5:7981889-7985037 FORWARD BioF PRK05958 PRK06939 PRK09064 Aminotran_1_2 PRK07179 PRK05937 PRK07505 protein|serine palmitoyltransferase 2, putative, expressed	3.68191
11.8.1.2	lipid metabolism.''exotics'' (steroids, squalene etc).sphingolipids.serine C-palmitoyltransferase	loc_os01g70380.1	Transcript	highly similar to ( 836) AT5G23670 | Symbols: LCB2 | LCB2; protein binding / serine C-palmitoyltransferase | chr5:7981889-7985037 FORWARD BioF PRK05958 PRK06939 PRK09064 Aminotran_1_2 PRK07179 PRK05937 PRK07505 protein|serine palmitoyltransferase 2, putative, expressed	3.19217
11.8.1.3	lipid metabolism.''exotics'' (steroids, squalene etc).sphingolipids.ceramide glucosyltransferase	loc_os01g67870.1	Transcript	highly similar to ( 805) AT2G19880 | Symbols: | ceramide glucosyltransferase, putative | chr2:8581578-8585118 FORWARD protein|expressed protein	-2.05937
11.8.2	lipid metabolism.''exotics'' (steroids, squalene etc).methylsterol monooxygenase	loc_os11g48020.1	Transcript	moderately similar to ( 395) AT2G29390 | Symbols: ATSMO2 | SMO2-2 (STEROL 4-ALPHA-METHYL-OXIDASE 2-2); 4-alpha-methyl-delta7-sterol-4alpha-methyl oxidase/ C-4 methylsterol oxidase | chr2:12610758-12611929 REVERSE ERG3 protein|fatty acid hydroxylase, putative, expressed	-1.72861
11.8.2	lipid metabolism.''exotics'' (steroids, squalene etc).methylsterol monooxygenase	loc_os10g39810.1	Transcript	moderately similar to ( 384) AT4G12110 | Symbols: SMO1-1, ATSMO1, ATSMO1-1 | SMO1-1 (STEROL-4ALPHA-METHYL OXIDASE 1-1); 4,4-dimethyl-9beta,19-cyclopropylsterol-4alpha-methyl oxidase/ C-4 methylsterol oxidase/ catalytic | chr4:7254197-7256004 FORWARD FA_hydroxylase protein|fatty acid hydroxylase, putative, expressed	-2.97952
11.8.4	lipid metabolism.''exotics'' (steroids, squalene etc).3-beta hydroxysteroid dehydrogenase/isomerase	loc_os02g48460.1	Transcript	highly similar to ( 666) AT2G33630 | Symbols: | 3-beta hydroxysteroid dehydrogenase/isomerase family protein | chr2:14236951-14238734 REVERSE 3Beta_HSD WcaG Epimerase protein|NAD dependent epimerase/dehydratase family protein, putative, expressed	1.74368
11.8.7	lipid metabolism.''exotics'' (steroids, squalene etc).trans-2-enoyl-CoA reductase (NADPH)	loc_os11g01154.1	Transcript	moderately similar to ( 469) AT3G45770 | Symbols: | oxidoreductase, zinc-binding dehydrogenase family protein | chr3:16805753-16807774 REVERSE Qor AdhP COG2130 Tdh protein|dehydrogenase, putative, expressed	2.52308
11.8.8	lipid metabolism.''exotics'' (steroids, squalene etc).squalene synthase	loc_os07g10130.1	Transcript	highly similar to ( 552) AT4G34640 | Symbols: SQS1, ERG9 | SQS1 (SQUALENE SYNTHASE 1); farnesyl-diphosphate farnesyltransferase | chr4:16538489-16541655 FORWARD SQS_PSY Trans_IPPS_HH ERG9 Trans_IPPS protein|squalene synthetase, putative, expressed	1.63029
11.8.10	lipid metabolism.'exotics' (steroids, squalene etc).phosphatidylcholinesterol O-acyltransferase	loc_os04g52500.1	Transcript	highly similar to ( 646) AT4G19860 | Symbols: | lecithin:cholesterol acyltransferase family protein / LACT family protein | chr4:10777655-10780260 REVERSE LACT protein|lecithine cholesterol acyltransferase, putative, expressed	1.25825
11.8.10	lipid metabolism.'exotics' (steroids, squalene etc).phosphatidylcholinesterol O-acyltransferase	loc_os09g33820.3	Transcript	moderately similar to ( 354) AT3G03310 | Symbols: | lecithin:cholesterol acyltransferase family protein / LACT family protein | chr3:778767-781488 REVERSE protein|lecithine cholesterol acyltransferase, putative, expressed	4.39184
11.8.10	lipid metabolism.'exotics' (steroids, squalene etc).phosphatidylcholinesterol O-acyltransferase	loc_os03g52010.1	Transcript	moderately similar to ( 405) AT1G27480 | Symbols: | lecithin:cholesterol acyltransferase family protein / LACT family protein | chr1:9544607-9546168 FORWARD LACT protein|lecithin cholesterol acyltransferase, putative, expressed	-2.84463
11.8.10	lipid metabolism.'exotics' (steroids, squalene etc).phosphatidylcholinesterol O-acyltransferase	loc_os02g37800.1	Transcript	moderately similar to ( 214) AT1G27480 | Symbols: | lecithin:cholesterol acyltransferase family protein / LACT family protein | chr1:9544607-9546168 FORWARD LACT protein|lecithin:cholesterol acyltransferase, putative, expressed	-6.08794
11.8.10	lipid metabolism.'exotics' (steroids, squalene etc).phosphatidylcholinesterol O-acyltransferase	loc_os02g37700.1	Transcript	moderately similar to ( 254) AT1G27480 | Symbols: | lecithin:cholesterol acyltransferase family protein / LACT family protein | chr1:9544607-9546168 FORWARD LACT protein|lecithin:cholesterol acyltransferase, putative, expressed	-3.7518
11.8.10	lipid metabolism.'exotics' (steroids, squalene etc).phosphatidylcholinesterol O-acyltransferase	loc_os10g08026.1	Transcript	moderately similar to ( 273) AT1G27480 | Symbols: | lecithin:cholesterol acyltransferase family protein / LACT family protein | chr1:9544607-9546168 FORWARD LACT protein|lecithin:cholesterol acyltransferase, putative, expressed	11.9711
11.8.10	lipid metabolism.'exotics' (steroids, squalene etc).phosphatidylcholinesterol O-acyltransferase	loc_os02g37654.1	Transcript	moderately similar to ( 241) AT1G27480 | Symbols: | lecithin:cholesterol acyltransferase family protein / LACT family protein | chr1:9544607-9546168 FORWARD LACT protein|lecithin:cholesterol acyltransferase, putative, expressed	-4.54185
11.9.2	lipid metabolism.lipid degradation.lipases	loc_os05g29974.1	Transcript	moderately similar to ( 481) AT2G47630 | Symbols: | esterase/lipase/thioesterase family protein | chr2:19534637-19536911 FORWARD PldB protein|lipase, putative, expressed	2.46797
11.9.2	lipid metabolism.lipid degradation.lipases	loc_os09g23150.1	Transcript	moderately similar to ( 410) AT1G73480 | Symbols: | hydrolase, alpha/beta fold family protein | chr1:27629266-27632486 FORWARD PldB protein|monoglyceride lipase, putative, expressed	-2.83567
11.9.2	lipid metabolism.lipid degradation.lipases	loc_os02g11720.1	Transcript	moderately similar to ( 414) AT1G52760 | Symbols: | esterase/lipase/thioesterase family protein | chr1:19651378-19652576 FORWARD PldB protein|lipase, putative, expressed	3.52877
11.9.2	lipid metabolism.lipid degradation.lipases	loc_os03g22670.1	Transcript	weakly similar to ( 158) AT5G18640 | Symbols: | lipase class 3 family protein | chr5:6213247-6215494 FORWARD protein|triacylglycerol Lipase, putative, expressed	1.89261
11.9.2	lipid metabolism.lipid degradation.lipases	loc_os11g43510.1	Transcript	moderately similar to ( 386) AT5G18640 | Symbols: | lipase class 3 family protein | chr5:6213247-6215494 FORWARD Lipase_3 Lipase_3 Lipase protein|lipase precursor, putative, expressed	3.32465
11.9.2	lipid metabolism.lipid degradation.lipases	loc_os05g30900.1	Transcript	moderately similar to ( 423) AT5G18640 | Symbols: | lipase class 3 family protein | chr5:6213247-6215494 FORWARD Lipase_3 Lipase_3 Lipase protein|lipase precursor, putative, expressed	1.39807
11.9.2.1	lipid metabolism.lipid degradation.lipases.triacylglycerol lipase	loc_os09g39790.1	Transcript	moderately similar to ( 476) AT2G42450 | Symbols: | lipase class 3 family protein | chr2:17672425-17674854 REVERSE Lipase_3 Lipase_3 protein|lipase, putative, expressed	2.26486
11.9.2.1	lipid metabolism.lipid degradation.lipases.triacylglycerol lipase	loc_os12g36770.2	Transcript	moderately similar to ( 347) AT4G16070 | Symbols: | lipase class 3 family protein | chr4:9096808-9100596 REVERSE Lipase_3 Lipase_3 Lipase protein|lipase class 3 family protein, putative, expressed	2.26961
11.9.2.1	lipid metabolism.lipid degradation.lipases.triacylglycerol lipase	loc_os09g01590.1	Transcript	moderately similar to ( 498) AT2G15230 | Symbols: ATLIP1 | ATLIP1 (Arabidopsis thaliana lipase 1); galactolipase/ hydrolase/ phospholipase/ triacylglycerol lipase | chr2:6612666-6615204 FORWARD protein|triacylglycerol lipase 1 precursor, putative, expressed	1.95708
11.9.2.1	lipid metabolism.lipid degradation.lipases.triacylglycerol lipase	loc_os02g43700.1	Transcript	moderately similar to ( 356) AT4G16820 | Symbols: | lipase class 3 family protein | chr4:9467563-9469116 FORWARD Lipase_3 Lipase_3 Lipase protein|triacylglycerol lipase like protein, putative, expressed	-2.56606
11.9.2.1	lipid metabolism.lipid degradation.lipases.triacylglycerol lipase	loc_os01g15000.1	Transcript	moderately similar to ( 466) AT1G02660 | Symbols: | lipase class 3 family protein | chr1:572187-574746 REVERSELipase_3 Lipase_3 protein|lipase, putative, expressed	1.03664
11.9.2.1	lipid metabolism.lipid degradation.lipases.triacylglycerol lipase	loc_os02g28040.1	Transcript	highly similar to ( 865) AT3G07400 | Symbols: | lipase class 3 family protein | chr3:2367456-2372238 FORWARD protein|lipase, putative, expressed	1.37637
11.9.2.1	lipid metabolism.lipid degradation.lipases.triacylglycerol lipase	loc_os08g41780.1	Transcript	moderately similar to ( 386) AT5G14180 | Symbols: MPL1 | MPL1 (MYZUS PERSICAE-INDUCED LIPASE 1); catalytic | chr5:4571442-4574413 REVERSE protein|triacylglycerol lipase precursor, putative, expressed	10.0317
11.9.2.1	lipid metabolism.lipid degradation.lipases.triacylglycerol lipase	loc_os11g19340.1	Transcript	moderately similar to ( 406) AT1G05800 | Symbols: DGL | DGL (DONGLE); triacylglycerol lipase | chr1:1741204-1742619 FORWARD Lipase_3 Lipase_3 protein|lipase, putative, expressed	-10.4092
11.9.2.1	lipid metabolism.lipid degradation.lipases.triacylglycerol lipase	loc_os01g20840.1	Transcript	highly similar to ( 583) AT4G16070 | Symbols: | lipase class 3 family protein | chr4:9096808-9100596 REVERSE Lipase_3 Lipase_3 Lipase protein|lipase class 3 family protein, putative, expressed	2.0756
11.9.2.1	lipid metabolism.lipid degradation.lipases.triacylglycerol lipase	loc_os04g56240.1	Transcript	moderately similar to ( 290) AT5G67050 | Symbols: | lipase class 3 family protein | chr5:26759482-26761165 REVERSE Lipase_3 Lipase_3 protein|lipase, putative, expressed	-4.23705
11.9.2.1	lipid metabolism.lipid degradation.lipases.triacylglycerol lipase	loc_os02g52830.1	Transcript	moderately similar to ( 455) AT5G42930 | Symbols: | triacylglycerol lipase | chr5:17210738-17214152 REVERSE Lipase_3 Lipase_3 Lipase protein|lipase, putative, expressed	3.43248
11.9.3	lipid metabolism.lipid degradation.lysophospholipases	loc_os07g03160.1	Transcript	highly similar to ( 977) AT3G18860 | Symbols: | transducin family protein / WD-40 repeat family protein | chr3:6501774-6508352 FORWARDvery weakly similar to (82.8) GBLP_SOYBN Guanine nucleotide-binding protein subunit beta-like protein - Glycine max (Soybean) PUL WD40 PFU COG2319 protein|WD domain, G-beta repeat domain containing protein, expressed	1.05841
11.9.3	lipid metabolism.lipid degradation.lysophospholipases	loc_os08g01920.1	Transcript	nearly identical (1004) AT1G31480 | Symbols: SGR2 | SGR2 (SHOOT GRAVITROPISM 2); phospholipase A1 | chr1:11266225-11271527 FORWARD DDHD protein|SGR2, putative, expressed	1.45895
11.9.3.1	lipid metabolism.lipid degradation.lysophospholipases.phospholipase D	loc_os06g40180.1	Transcript	nearly identical (1031) AT3G15730 | Symbols: PLDALPHA1, PLD | PLDALPHA1 (PHOSPHOLIPASE D ALPHA 1); phospholipase D | chr3:5330835-5333474 FORWARDnearly identical (1218) PLDA2_ORYSA Phospholipase D alpha 2 (EC 3.1.4.4) (PLD alpha 2) (Choline phosphatase 2) (Phosphatidylcholine-hydrolyzing phospholipase D 2) - Oryza sativa (Rice) C2_2 protein|phospholipase D, putative, expressed	-5.83337
11.9.3.1	lipid metabolism.lipid degradation.lysophospholipases.phospholipase D	loc_os06g40170.1	Transcript	nearly identical (1045) AT3G15730 | Symbols: PLDALPHA1, PLD | PLDALPHA1 (PHOSPHOLIPASE D ALPHA 1); phospholipase D | chr3:5330835-5333474 FORWARDnearly identical (1246) PLDA2_ORYSA Phospholipase D alpha 2 (EC 3.1.4.4) (PLD alpha 2) (Choline phosphatase 2) (Phosphatidylcholine-hydrolyzing phospholipase D 2) - Oryza sativa (Rice) C2_2 protein|phospholipase D, putative, expressed	-3.97952
11.9.3.2	lipid metabolism.lipid degradation.lysophospholipases.carboxylesterase	loc_os04g57370.1	Transcript	moderately similar to ( 329) AT4G22300 | Symbols: SOBER1 | SOBER1 (SUPPRESSOR OF AVRBST-ELICITED RESISTANCE 1); carboxylesterase | chr4:11787560-11791055 REVERSE Abhydrolase_2 COG0400 protein|acyl-protein thioesterase, putative, expressed	1.57364
11.9.3.3	lipid metabolism.lipid degradation.lysophospholipases.glycerophosphodiester phosphodiesterase	loc_os08g39350.1	Transcript	highly similar to ( 653) AT5G55480 | Symbols: SVL1 | SVL1 (SHV3-LIKE 1); glycerophosphodiester phosphodiesterase/ phosphoric diester hydrolase | chr5:22474277-22477819 FORWARD GDPD UgpQ protein|glycerophosphoryl diester phosphodiesterase family protein, putative, expressed	1.78969
11.9.3.3	lipid metabolism.lipid degradation.lysophospholipases.glycerophosphodiester phosphodiesterase	loc_os02g37590.1	Transcript	highly similar to ( 691) AT4G26690 | Symbols: SHV3, MRH5, GPDL2 | SHV3 (SHAVEN 3); glycerophosphodiester phosphodiesterase/ kinase | chr4:13456793-13459890 REVERSE GDPD UgpQ protein|glycerophosphoryl diester phosphodiesterase family protein, putative, expressed	-3.34039
11.9.3.3	lipid metabolism.lipid degradation.lysophospholipases.glycerophosphodiester phosphodiesterase	loc_os08g42390.1	Transcript	moderately similar to ( 352) AT3G02040 | Symbols: SRG3 | SRG3 (senescence-related gene 3); glycerophosphodiester phosphodiesterase/ phosphoric diester hydrolase | chr3:348505-349909 REVERSE GDPD UgpQ protein|glycerophosphoryl diester phosphodiesterase family protein, putative, expressed	2.40162
11.9.3.4	lipid metabolism.lipid degradation.lysophospholipases.phospholipase A2	loc_os02g58500.1	Transcript	weakly similar to ( 122) AT4G29460 | Symbols: | phospholipase A2 gamma, secretory low molecular weight | chr4:14483066-14483930 REVERSEPLA2_plant protein|phospholipase A2, putative, expressed	1.90641
11.9.3.5	lipid metabolism.lipid degradation.lysophospholipases.phosphoinositide phospholipase C	loc_os03g61130.1	Transcript	highly similar to ( 790) AT1G07230 | Symbols: | hydrolase, acting on ester bonds | chr1:2220509-2222778 REVERSEPhosphoesterase PlcC protein|phosphoesterase family protein, putative, expressed	2.04434
11.9.4.2	lipid metabolism.lipid degradation.beta-oxidation.acyl CoA DH	loc_os05g07090.1	Transcript	highly similar to ( 678) AT3G51840 | Symbols: ACX4, ATSCX, ATG6 | ACX4 (ACYL-COA OXIDASE 4); acyl-CoA oxidase/ oxidoreductase | chr3:19225653-19229008 REVERSEweakly similar to ( 160) IVD1_SOLTU Isovaleryl-CoA dehydrogenase 1, mitochondrial precursor (EC 1.3.99.10) (IVD 1) - Solanum tuberosum (Potato) GCD SCAD/SBCAD CaiA ACAD IVD LCAD IBD VLCAD MCAD PRK12341 PRK03354 ACAD_fadE5 ACAD_fadE6_17_26 Ac…	2.44009
11.9.4.2	lipid metabolism.lipid degradation.beta-oxidation.acyl CoA DH	loc_os11g39220.1	Transcript	nearly identical (1103) AT5G65110 | Symbols: ACX2, ATACX2 | ACX2 (ACYL-COA OXIDASE 2); acyl-CoA oxidase | chr5:26010060-26012482 REVERSEnearly identical (1086) ACOX2_CUCMA Acyl-coenzyme A oxidase, peroxisomal precursor (EC 1.3.3.6) (AOX) (Long-chain acyl-CoA oxidase) - Cucurbita maxima (Pumpkin) (Winter squash) AXO ACAD SCAD/SBCAD CaiA VLCAD GCD ACOX protein|acyl-coenzyme A oxidase, putative, exp…	6.27378
11.9.4.2	lipid metabolism.lipid degradation.beta-oxidation.acyl CoA DH	loc_os07g47820.1	Transcript	nearly identical (1160) AT3G06810 | Symbols: IBR3 | IBR3 (IBA-RESPONSE 3); acyl-CoA dehydrogenase/ oxidoreductase | chr3:2146534-2150654 FORWARDvery weakly similar to (97.4) IVD1_SOLTU Isovaleryl-CoA dehydrogenase 1, mitochondrial precursor (EC 1.3.99.10) (IVD 1) - Solanum tuberosum (Potato) ACAD_FadE2 ACAD CaiA COG3173 SCAD/SBCAD IBD ACAD_fadE6_17_26 VLCAD MCAD LCAD Acyl-CoA_dh_1 IVD APH PRK1234…	3.80688
11.9.4.2	lipid metabolism.lipid degradation.beta-oxidation.acyl CoA DH	loc_os06g23870.1	Transcript	weakly similar to ( 165) AT3G51840 | Symbols: ACX4, ATSCX, ATG6 | ACX4 (ACYL-COA OXIDASE 4); acyl-CoA oxidase/ oxidoreductase | chr3:19225653-19229008 REVERSE GCD protein|acyl-CoA dehydrogenase domain protein, putative, expressed	1.63339
11.9.4.2	lipid metabolism.lipid degradation.beta-oxidation.acyl CoA DH	loc_os06g24704.1	Transcript	highly similar to ( 956) AT1G06290 | Symbols: ACX3, ATACX3 | ACX3 (ACYL-COA OXIDASE 3); acyl-CoA oxidase | chr1:1922423-1926002 FORWARDmoderately similar to ( 342) ACOX2_CUCMA Acyl-coenzyme A oxidase, peroxisomal precursor (EC 1.3.3.6) (AOX) (Long-chain acyl-CoA oxidase) - Cucurbita maxima (Pumpkin) (Winter squash) AXO ACAD CaiA SCAD/SBCAD ACOX GCD protein|acyl-coenzyme A oxidase, putative, expre…	2.98887
11.9.4.4	lipid metabolism.lipid degradation.beta-oxidation.hydroxybutyryl CoA DH	loc_os03g19680.1	Transcript	moderately similar to ( 328) AT4G16210 | Symbols: ECHIA, E-COAH-2 | ECHIA (ENOYL-COA HYDRATASE/ISOMERASE A); catalytic | chr4:9176864-9177978 REVERSE PRK06190 CaiD PRK08138 PRK05809 PRK07628 PRK08140 PRK05979 PRK05862 PRK07657 PRK07799 ECH PRK06688 PRK07510 PRK06210 PRK05870 PRK08252 PRK09245 PRK07327 PRK07658 PRK07511 PRK08260 PRK07830 PRK07509 PRK09674 PRK08139 PRK07629 PRK05864 PRK06563 PRK060…	4.22846
11.9.4.5	lipid metabolism.lipid degradation.beta-oxidation.acyl-CoA thioesterase	loc_os04g35590.1	Transcript	weakly similar to ( 124) AT1G04290 | Symbols: | thioesterase family protein | chr1:1147721-1148352 REVERSE protein|thioesterase family protein, putative, expressed	1.96442
11.9.4.5	lipid metabolism.lipid degradation.beta-oxidation.acyl-CoA thioesterase	loc_os02g32200.1	Transcript	weakly similar to ( 127) AT2G29590 | Symbols: | thioesterase family protein | chr2:12654602-12655432 REVERSE protein|thioesterase family protein, putative, expressed	1.81746
11.9.4.9	lipid metabolism.lipid degradation.beta-oxidation.multifunctional	loc_os02g17390.1	Transcript	highly similar to ( 945) AT4G29010 | Symbols: AIM1 | AIM1 (ABNORMAL INFLORESCENCE MERISTEM); enoyl-CoA hydratase | chr4:14297312-14302016 REVERSEnearly identical (1399) MFP_ORYSA Peroxisomal fatty acid beta-oxidation multifunctional protein (MFP) [Includes: Enoyl-CoA hydratase (EC 4.2.1.17); 3-2-trans-enoyl-CoA isomerase (EC 5.3.3.8); 3-hydroxybutyryl-CoA epimerase (EC 5.1.2.3); 3-hydroxyacyl-CoA…	3.24875
11.9.4.13	lipid metabolism.lipid degradation.beta-oxidation.acyl CoA reductase	loc_os08g44360.1	Transcript	moderately similar to ( 410) AT5G22500 | Symbols: FAR1 | FAR1 (FATTY ACID REDUCTASE 1); fatty acyl-CoA reductase (alcohol-forming)/ oxidoreductase, acting on the CH-CH group of donors | chr5:7470541-7473916 FORWARD NAD_binding_4 COG3320 protein|male sterility protein 2, putative, expressed	2.53794
11.10.1	lipid metabolism.glycolipid synthesis.MGDG synthase	loc_os02g55910.1	Transcript	highly similar to ( 624) AT2G11810 | Symbols: MGDC, MGD3, ATMGD3 | MGDC; 1,2-diacylglycerol 3-beta-galactosyltransferase | chr2:4743388-4746224 FORWARDMGDG_synth MurG murG protein|monogalactosyldiacylglycerol synthase, putative, expressed	-3.44526
11.10.2	lipid metabolism.glycolipid synthesis.DGDG synthase	loc_os04g34000.1	Transcript	highly similar to ( 960) AT3G11670 | Symbols: DGD1 | DGD1 (DIGALACTOSYL DIACYLGLYCEROL DEFICIENT 1); UDP-galactosyltransferase/ galactolipid galactosyltransferase/ transferase, transferring glycosyl groups | chr3:3681679-3684495 REVERSEnearly identical (1050) DGDG1_LOTJA Digalactosyldiacylglycerol synthase 1, chloroplast precursor (EC 2.4.1.241) - Lotus japonicus protein|digalactosyldiacylglycero…	-1.97011
11.10.2	lipid metabolism.glycolipid synthesis.DGDG synthase	loc_os02g33580.1	Transcript	highly similar to ( 921) AT3G11670 | Symbols: DGD1 | DGD1 (DIGALACTOSYL DIACYLGLYCEROL DEFICIENT 1); UDP-galactosyltransferase/ galactolipid galactosyltransferase/ transferase, transferring glycosyl groups | chr3:3681679-3684495 REVERSEhighly similar to ( 964) DGDG1_LOTJA Digalactosyldiacylglycerol synthase 1, chloroplast precursor (EC 2.4.1.241) - Lotus japonicus protein|digalactosyldiacylglycer…	-1.95167
11.10.2	lipid metabolism.glycolipid synthesis.DGDG synthase	loc_os03g11560.1	Transcript	highly similar to ( 652) AT4G00550 | Symbols: DGD2 | DGD2; UDP-galactosyltransferase/ UDP-glycosyltransferase/ digalactosyldiacylglycerol synthase/ transferase, transferring glycosyl groups | chr4:238154-240019 REVERSEhighly similar to ( 677) DGDG2_LOTJA Digalactosyldiacylglycerol synthase 2, chloroplast (EC 2.4.1.241) - Lotus japonicus protein|digalactosyldiacylglycerol synthase, chloroplast pre…	1.41875
11.10.4	lipid metabolism.glycolipid synthesis.sulfolipid synthase	loc_os07g01030.1	Transcript	highly similar to ( 661) AT5G01220 | Symbols: SQD2 | SQD2 (sulfoquinovosyldiacylglycerol 2); UDP-glycosyltransferase/ UDP-sulfoquinovose:DAG sulfoquinovosyltransferase/ transferase, transferring glycosyl groups | chr5:86907-89885 REVERSE RfaG Glycos_transf_1 protein|glycosyl transferase, group 1 domain containing protein, expressed	-1.29277
12.1.1	N-metabolism.nitrate metabolism.NR	loc_os10g17780.1	Transcript	moderately similar to ( 254) AT1G77760 | Symbols: NIA1, GNR1, NR1 | NIA1 (NITRATE REDUCTASE 1); nitrate reductase | chr1:29236005-29239367 REVERSEmoderately similar to ( 372) NIA1_ORYSA Nitrate reductase [NADH] 1 (EC 1.7.1.1) (NR1) - Oryza sativa (Rice) FAD_binding_6 protein|oxidoreductase, FAD-binding family protein, expressed	3.42098
12.1.1	N-metabolism.nitrate metabolism.NR	loc_os02g53130.1	Transcript	nearly identical (1264) AT1G77760 | Symbols: NIA1, GNR1, NR1 | NIA1 (NITRATE REDUCTASE 1); nitrate reductase | chr1:29236005-29239367 REVERSEnearly identical (1568) NIA7_HORVU Nitrate reductase [NAD(P)H] (EC 1.7.1.2) - Hordeum vulgare (Barley) eukary_NR_Moco eukary_SO_Moco SO_family_Moco_dimer Mo-co_dimer SO_family_Moco Oxidored_molyb bact_SoxC_Moco FAD_binding_6 NAD_binding_1 bact_SorA_Moco UbiB…	-12.9375
12.1.1	N-metabolism.nitrate metabolism.NR	loc_os08g36480.1	Transcript	nearly identical (1275) AT1G77760 | Symbols: NIA1, GNR1, NR1 | NIA1 (NITRATE REDUCTASE 1); nitrate reductase | chr1:29236005-29239367 REVERSEnearly identical (1834) NIA1_ORYSA Nitrate reductase [NADH] 1 (EC 1.7.1.1) (NR1) - Oryza sativa (Rice) eukary_NR_Moco eukary_SO_Moco SO_family_Moco_dimer Mo-co_dimer SO_family_Moco Oxidored_molyb bact_SoxC_Moco FAD_binding_6 NAD_binding_1 bact_SorA_Moco UbiB…	-6.36659
12.2.1	N-metabolism.ammonia metabolism.glutamate synthase	loc_os07g46460.1	Transcript	nearly identical (2711) AT5G04140 | Symbols: GLU1, GLS1, GLUS, FD-GOGAT | GLU1 (GLUTAMATE SYNTHASE 1); glutamate synthase (ferredoxin) | chr5:1130031-1138186 FORWARDnearly identical (2989) GLTB_MAIZE Ferredoxin-dependent glutamate synthase, chloroplast precursor (EC 1.4.7.1) (Fd-GOGAT) - Zea mays (Maize) gltB GltS GltB Glu_synthase GltS_FMN Glu_syn_central GltB gltB_C GltB GXGXG GATase_2 GXGXG Gn…	-2.72813
12.2.1	N-metabolism.ammonia metabolism.glutamate synthase	loc_os05g48200.1	Transcript	nearly identical (3286) AT5G53460 | Symbols: GLT1 | GLT1; glutamate synthase (NADH) | chr5:21700518-21709629 FORWARDnearly identical (3318) GLSN_MEDSA Glutamate synthase [NADH], chloroplast precursor (EC 1.4.1.14) (NADH-GOGAT) - Medicago sativa (Alfalfa) gltB gltD GltS GltB Glu_synthase GltD GltS_FMN GltB Glu_syn_central PRK11749 gltB_C GltB PRK12831 PRK12769 PRK12771 GXGXG PRK12778 GXGXG PRK1281…	6.97062
12.2.2	N-metabolism.ammonia metabolism.glutamine synthase	loc_os02g50240.1	Transcript	highly similar to ( 660) AT5G37600 | Symbols: ATGSR1, GLN1;1, GSR 1 | ATGSR1; copper ion binding / glutamate-ammonia ligase | chr5:14933574-14935656 REVERSEhighly similar to ( 721) GLN11_ORYSA Glutamine synthetase cytosolic isozyme 1-1 (EC 6.3.1.2) (OsGLN1;1) (OsGS1;1) (Glutamate--ammonia ligase GLN1;1) (Glutamine synthetase shoot isozyme) - Oryza sativa (Rice) Gln-synt_C GlnA Gln-synt_N protein|…	-1.92648
12.2.2	N-metabolism.ammonia metabolism.glutamine synthase	loc_os04g56400.1	Transcript	highly similar to ( 647) AT5G35630 | Symbols: GS2, GLN2, ATGSL1 | GS2 (GLUTAMINE SYNTHETASE 2); glutamate-ammonia ligase | chr5:13831220-13833239 FORWARDhighly similar to ( 751) GLNA2_ORYSA Glutamine synthetase, chloroplast precursor (EC 6.3.1.2) (Glutamate--ammonia ligase) (GS2) (OsGS2) - Oryza sativa (Rice) Gln-synt_C GlnA Gln-synt_N protein|glutamine synthetase, catalytic domain containing pro…	-5.03936
12.2.99	N-metabolism.ammonia metabolism.unspecified	loc_os08g14580.1	Transcript	moderately similar to ( 333) AT4G25840 | Symbols: GPP1 | GPP1 (glycerol-3-phosphatase 1); catalytic/ hydrolase | chr4:13139026-13140719 FORWARD COG0637 Hydrolase PRK10725 protein|haloacid dehalogenase-like hydrolase domain-containing protein 1A, putative, expressed	-1.69755
12.2.99	N-metabolism.ammonia metabolism.unspecified	loc_os01g55310.1	Transcript	moderately similar to ( 258) AT4G21470 | Symbols: ATFMN/FHY | ATFMN/FHY (riboflavin kinase/FMN hydrolase); FMN adenylyltransferase/ riboflavin kinase | chr4:11431284-11433197 FORWARD COG0637 Gph Hydrolase PRK10826 PRK10725 COG1011 protein|haloacid dehalogenase-like hydrolase domain-containing protein 1A, putative, expressed	-2.00048
12.3.1	N-metabolism.N-degradation.glutamate dehydrogenase	loc_os04g45970.1	Transcript	moderately similar to ( 370) AT5G07440 | Symbols: GDH2 | GDH2 (GLUTAMATE DEHYDROGENASE 2); ATP binding / glutamate dehydrogenase [NAD(P)+]/ glutamate dehydrogenase/ oxidoreductase | chr5:2356153-2357546 FORWARDmoderately similar to ( 366) DHEA_NICPL Glutamate dehydrogenase A (EC 1.4.1.3) (GDH A) - Nicotiana plumbaginifolia (Leadwort-leaved tobacco) ELFV_dehydrog GdhA PRK09414 protein|glutamate de…	1.13152
12.3.1	N-metabolism.N-degradation.glutamate dehydrogenase	loc_os03g58040.1	Transcript	highly similar to ( 748) AT5G18170 | Symbols: GDH1 | GDH1 (GLUTAMATE DEHYDROGENASE 1); ATP binding / glutamate dehydrogenase [NAD(P)+]/ oxidoreductase | chr5:6006172-6008248 FORWARDhighly similar to ( 801) DHE3_MAIZE Glutamate dehydrogenase (EC 1.4.1.3) (GDH) - Zea mays (Maize) GdhA ELFV_dehydrog PRK09414 ELFV_dehydrog_N protein|glutamate dehydrogenase protein, putative, expressed	8.16023
12.4	N-metabolism.misc	loc_os04g02730.1	Transcript	highly similar to ( 789) AT4G38890 | Symbols: | dihydrouridine synthase family protein | chr4:18135909-18139100 REVERSE DUS_like_FMN COG0042 Dus PRK10415 protein|tRNA-dihydrouridine synthase 3-like, putative, expressed	2.3503
13	amino acid metabolism	loc_os12g05650.1	Transcript	moderately similar to ( 302) AT5G04740 | Symbols: | ACT domain-containing protein | chr5:1368713-1371391 REVERSE protein|ACT domain containing protein, expressed	2.93169
13.1.1.1.1	amino acid metabolism.synthesis.central amino acid metabolism.GABA.Glutamate decarboxylase	loc_os03g13300.1	Transcript	highly similar to ( 838) AT5G17330 | Symbols: GAD, GAD1 | GAD; calmodulin binding / glutamate decarboxylase | chr5:5711141-5714839 FORWARDhighly similar to ( 806) DCE_PETHY Glutamate decarboxylase (EC 4.1.1.15) (GAD) - Petunia hybrida (Petunia) GadB Pyridoxal_deC protein|glutamate decarboxylase, putative, expressed	-4.23428
13.1.1.2.1	amino acid metabolism.synthesis.central amino acid metabolism.aspartate.aspartate aminotransferase	loc_os01g55540.1	Transcript	highly similar to ( 719) AT5G11520 | Symbols: ASP3, YLS4 | ASP3 (ASPARTATE AMINOTRANSFERASE 3); L-aspartate:2-oxoglutarate aminotransferase | chr5:3685257-3687721 REVERSEhighly similar to ( 829) AATC_ORYSA Aspartate aminotransferase, cytoplasmic (EC 2.6.1.1) (Transaminase A) - Oryza sativa (Rice) PRK09257 TyrB Aminotran_1_2 protein|aminotransferase, classes I and II, domain containing protein, ex…	2.80688
13.1.1.3.1	amino acid metabolism.synthesis.central amino acid metabolism.alanine.alanine aminotransferase	loc_os10g25130.1	Transcript	highly similar to ( 739) AT1G17290 | Symbols: AlaAT1 | AlaAT1 (ALANINE AMINOTRANSFERAS); ATP binding / L-alanine:2-oxoglutarate aminotransferase | chr1:5922771-5926093 FORWARDhighly similar to ( 834) ALA2_HORVU Alanine aminotransferase 2 (EC 2.6.1.2) (GPT) (Glutamic--pyruvic transaminase 2) (Glutamic--alanine transaminase 2) (ALAAT-2) - Hordeum vulgare (Barley) PRK09265 COG0436 PRK08363 PRK05764 …	1.25558
13.1.1.3.11	amino acid metabolism.synthesis.central amino acid metabolism.alanine.alanine-glyoxylate aminotransferase	loc_os08g39300.4	Transcript	highly similar to ( 689) AT2G13360 | Symbols: AGT, AGT1 | AGT (ALANINE:GLYOXYLATE AMINOTRANSFERASE); alanine-glyoxylate transaminase/ serine-glyoxylate transaminase/ serine-pyruvate transaminase | chr2:5539417-5540902 REVERSEweakly similar to ( 105) SGAT_MAIZE Serine--glyoxylate aminotransferase (EC 2.6.1.45) (SGAT) (Alanine--glyoxylate aminotransferase) (EC 2.6.1.44) (AGT) (Fragments) - Zea mays…	4.13702
13.1.1.3.11	amino acid metabolism.synthesis.central amino acid metabolism.alanine.alanine-glyoxylate aminotransferase	loc_os08g39300.3	Transcript	moderately similar to ( 259) AT2G13360 | Symbols: AGT, AGT1 | AGT (ALANINE:GLYOXYLATE AMINOTRANSFERASE); alanine-glyoxylate transaminase/ serine-glyoxylate transaminase/ serine-pyruvate transaminase | chr2:5539417-5540902 REVERSE COG0075 protein|aminotransferase, putative, expressed	3.45895
13.1.2.3.21	amino acid metabolism.synthesis.glutamate family.arginine.ornithine carbamoyltransferase	loc_os02g47590.1	Transcript	highly similar to ( 508) AT1G75330 | Symbols: OTC | OTC (ORNITHINE CARBAMOYLTRANSFERASE); amino acid binding / carboxyl- or carbamoyltransferase/ ornithine carbamoyltransferase | chr1:28266457-28268383 REVERSEhighly similar to ( 531) OTC_PEA Ornithine carbamoyltransferase, chloroplast precursor (EC 2.1.3.3) (OTCase) (Ornithine transcarbamylase) - Pisum sativum (Garden pea) ArgF PRK00779 PRK02102 …	2.2205
13.1.2.3.22	amino acid metabolism.synthesis.glutamate family.arginine.arginosuccinate synthase	loc_os12g13320.1	Transcript	highly similar to ( 726) AT4G24830 | Symbols: | arginosuccinate synthase family | chr4:12793085-12795857 REVERSE PRK00509 Argininosuccinate_Synthase ArgG Arginosuc_synth PRK05370 PRK04527 protein|argininosuccinate synthase, chloroplast precursor, putative, expressed	1.57846
13.1.2.3.23	amino acid metabolism.synthesis.glutamate family.arginine.argininosuccinate lyase	loc_os03g19280.1	Transcript	highly similar to ( 721) AT5G10920 | Symbols: | argininosuccinate lyase, putative / arginosuccinase, putative | chr5:3441805-3443892 FORWARDmoderately similar to ( 331) ARLY_CHLRE Argininosuccinate lyase (EC 4.3.2.1) (Arginosuccinase) (ASAL) - Chlamydomonas reinhardtii PRK00855 Argininosuccinate_lyase ArgH PRK12308 PRK04833 Lyase_1 PRK02186 Lyase_I Lyase_I_like PRK06705 PRK06389 Adenylsuccinate_l…	2.44578
13.1.3.1	amino acid metabolism.synthesis.aspartate family.asparagine	loc_os03g18130.1	Transcript	highly similar to ( 806) AT3G47340 | Symbols: ASN1, DIN6, AT-ASN1 | ASN1 (GLUTAMINE-DEPENDENT ASPARAGINE SYNTHASE 1); asparagine synthase (glutamine-hydrolyzing) | chr3:17438445-17441043 REVERSEhighly similar to ( 845) ASNS_MAIZE Asparagine synthetase [glutamine-hydrolyzing] (EC 6.3.5.4) (Glutamine-dependent asparagine synthetase) - Zea mays (Maize) asnB AsnB Asn_Synthase_B_C AsnB Asn_synthase Gn…	4.96299
13.1.3.1.1	amino acid metabolism.synthesis.aspartate family.asparagine.asparagine synthetase	loc_os12g38630.1	Transcript	highly similar to ( 621) AT2G03667 | Symbols: | asparagine synthase (glutamine-hydrolyzing) | chr2:1114179-1117281 FORWARD Gn_AT_II_novel Asn_Synthase_B_C AsnB Asn_synthase protein|asparagine synthase family protein, expressed	1.7208
13.1.3.2.1	amino acid metabolism.synthesis.aspartate family.threonine.threonine synthase	loc_os05g47640.1	Transcript	highly similar to ( 746) AT4G29840 | Symbols: MTO2, TS | MTO2 (METHIONINE OVER-ACCUMULATOR 2); threonine synthase | chr4:14599434-14601014 REVERSEhighly similar to ( 754) THRC_SOLTU Threonine synthase, chloroplast precursor (EC 4.2.3.1) (TS) - Solanum tuberosum (Potato)PRK06260 ThrC PRK06177 PRK07409 PRK07871 PRK07702 PRK08197 PRK06721 PRK06352 PRK05638 PALP PRK07591 PRK08329 PRK09225 PRK06381 Il…	1.89319
13.1.3.4	amino acid metabolism.synthesis.aspartate family.methionine	loc_os01g22010.2	Transcript	highly similar to ( 719) AT1G02500 | Symbols: SAM1, SAM-1, MAT1 | SAM1 (S-ADENOSYLMETHIONINE SYNTHETASE 1); methionine adenosyltransferase | chr1:519037-520218 FORWARDhighly similar to ( 774) METL_ORYSA S-adenosylmethionine synthetase 2 (EC 2.5.1.6) (Methionine adenosyltransferase 2) (AdoMet synthetase 2) - Oryza sativa (Rice) PRK05250 MetK PRK12459 S-AdoMet_synt_C S-AdoMet_synt_M S-AdoMet_synt_N…	-3.58544
13.1.3.4	amino acid metabolism.synthesis.aspartate family.methionine	loc_os01g22010.1	Transcript	highly similar to ( 719) AT1G02500 | Symbols: SAM1, SAM-1, MAT1 | SAM1 (S-ADENOSYLMETHIONINE SYNTHETASE 1); methionine adenosyltransferase | chr1:519037-520218 FORWARDhighly similar to ( 774) METL_ORYSA S-adenosylmethionine synthetase 2 (EC 2.5.1.6) (Methionine adenosyltransferase 2) (AdoMet synthetase 2) - Oryza sativa (Rice) PRK05250 MetK PRK12459 S-AdoMet_synt_C S-AdoMet_synt_M S-AdoMet_synt_N…	-3.17882
13.1.3.4	amino acid metabolism.synthesis.aspartate family.methionine	loc_os01g18860.1	Transcript	highly similar to ( 717) AT1G02500 | Symbols: SAM1, SAM-1, MAT1 | SAM1 (S-ADENOSYLMETHIONINE SYNTHETASE 1); methionine adenosyltransferase | chr1:519037-520218 FORWARDhighly similar to ( 750) METK_ORYSA S-adenosylmethionine synthetase 1 (EC 2.5.1.6) (Methionine adenosyltransferase 1) (AdoMet synthetase 1) - Oryza sativa (Rice) PRK05250 MetK PRK12459 S-AdoMet_synt_C S-AdoMet_synt_M S-AdoMet_synt_N…	3.54972
13.1.3.4	amino acid metabolism.synthesis.aspartate family.methionine	loc_os05g04510.1	Transcript	highly similar to ( 719) AT1G02500 | Symbols: SAM1, SAM-1, MAT1 | SAM1 (S-ADENOSYLMETHIONINE SYNTHETASE 1); methionine adenosyltransferase | chr1:519037-520218 FORWARDhighly similar to ( 786) METK_ORYSA S-adenosylmethionine synthetase 1 (EC 2.5.1.6) (Methionine adenosyltransferase 1) (AdoMet synthetase 1) - Oryza sativa (Rice) PRK05250 MetK PRK12459 S-AdoMet_synt_C S-AdoMet_synt_M S-AdoMet_synt_N…	1.2177
13.1.3.4.12	amino acid metabolism.synthesis.aspartate family.methionine.homocysteine S-methyltransferase	loc_os06g43800.1	Transcript	moderately similar to ( 391) AT2G41040 | Symbols: | methyltransferase-related | chr2:17121499-17123064 FORWARDMethyltransf_11 UbiE ubiE protein|methyltransferase domain containing protein, putative, expressed	-1.47853
13.1.3.4.12	amino acid metabolism.synthesis.aspartate family.methionine.homocysteine S-methyltransferase	loc_os04g31000.1	Transcript	highly similar to ( 674) AT2G31740 | Symbols: | methyltransferase | chr2:13491053-13495009 REVERSE protein|methyltransferase domain containing protein, expressed	2.26631
13.1.3.4.12	amino acid metabolism.synthesis.aspartate family.methionine.homocysteine S-methyltransferase	loc_os05g32590.1	Transcript	moderately similar to ( 255) AT3G60910 | Symbols: | catalytic/ methyltransferase | chr3:22501727-22503182 FORWARD protein|methyltransferase, putative, expressed	1.57326
13.1.3.4.12	amino acid metabolism.synthesis.aspartate family.methionine.homocysteine S-methyltransferase	loc_os08g31750.1	Transcript	moderately similar to ( 317) AT1G78140 | Symbols: | methyltransferase-related | chr1:29401937-29403878 REVERSEMethyltransf_11 UbiE protein|methyltransferase, putative, expressed	-3.81864
13.1.3.4.13	amino acid metabolism.synthesis.aspartate family.methionine.methionine S-methyltransferase	loc_os03g62670.1	Transcript	moderately similar to ( 211) AT2G43940 | Symbols: | thiol methyltransferase, putative | chr2:18196091-18197664 REVERSETPMT protein|expressed protein	-8.72148
13.1.3.5.3	amino acid metabolism.synthesis.aspartate family.lysine.LL-diaminopimelic acid aminotransferase	loc_os03g18810.1	Transcript	highly similar to ( 702) AT4G33680 | Symbols: AGD2 | AGD2 (ABERRANT GROWTH AND DEATH 2); L,L-diaminopimelate aminotransferase/ transaminase | chr4:16171847-16174630 REVERSE PRK07590 COG0436 PRK09276 PRK08068 PRK09148 PRK07681 PRK05942 PRK07682 PRK07337 PRK07212 PRK08636 PRK08361 PRK05764 Aminotran_1_2 PRK08175 PRK07366 PRK06108 PRK06220 PRK06290 PRK07683 PRK08362 PRK05794 PRK07778 PRK09147 HisC P…	1.60703
13.1.3.5.5	amino acid metabolism.synthesis.aspartate family.lysine.diaminopimelate decarboxylase	loc_os02g24354.1	Transcript	highly similar to ( 734) AT3G14390 | Symbols: | diaminopimelate decarboxylase, putative / DAP carboxylase, putative | chr3:4806771-4808954 FORWARD LysA PRK08961 PRK11165 Orn_Arg_deC_N Orn_DAP_Arg_deC protein|pyridoxal-dependent decarboxylase protein, putative, expressed	1.98333
13.1.3.6.1.1	amino acid metabolism.synthesis.aspartate family.misc.homoserine.aspartate kinase	loc_os08g25390.1	Transcript	nearly identical (1354) AT4G19710 | Symbols: AK-HSDH II, AK-HSDH | bifunctional aspartate kinase/homoserine dehydrogenase, putative / AK-HSDH, putative | chr4:10725229-10729536 FORWARDnearly identical (1615) AKH1_MAIZE Bifunctional aspartokinase/homoserine dehydrogenase 1, chloroplast precursor (AK-HD 1) (AK-HSDH 1) [Includes: Aspartokinase (EC 2.7.2.4); Homoserine dehydrogenase (EC 1.1.1.3)] - Z…	3.01149
13.1.3.6.1.1	amino acid metabolism.synthesis.aspartate family.misc.homoserine.aspartate kinase	loc_os03g63330.1	Transcript	highly similar to ( 760) AT5G13280 | Symbols: AK-LYS1, AK1, AK | AK-LYS1 (ASPARTATE KINASE 1); aspartate kinase | chr5:4249516-4252654 FORWARDweakly similar to ( 172) AKH1_MAIZE Bifunctional aspartokinase/homoserine dehydrogenase 1, chloroplast precursor (AK-HD 1) (AK-HSDH 1) [Includes: Aspartokinase (EC 2.7.2.4); Homoserine dehydrogenase (EC 1.1.1.3)] - Zea mays (Maize) AAK_AK-LysC-like LysC PRK…	-3.59144
13.1.3.6.1.1	amino acid metabolism.synthesis.aspartate family.misc.homoserine.aspartate kinase	loc_os09g12290.1	Transcript	nearly identical (1303) AT4G19710 | Symbols: AK-HSDH II, AK-HSDH | bifunctional aspartate kinase/homoserine dehydrogenase, putative / AK-HSDH, putative | chr4:10725229-10729536 FORWARDnearly identical (1582) AKH2_MAIZE Bifunctional aspartokinase/homoserine dehydrogenase 2, chloroplast precursor (AK-HD 2) (AK-HSDH 2) [Includes: Aspartokinase (EC 2.7.2.4); Homoserine dehydrogenase (EC 1.1.1.3)] - Z…	-6.0102
13.1.3.6.1.2	amino acid metabolism.synthesis.aspartate family.misc.homoserine.aspartate semialdehyde dehydrogenase	loc_os03g55280.1	Transcript	moderately similar to ( 491) AT1G14810 | Symbols: | semialdehyde dehydrogenase family protein | chr1:5102684-5104633 REVERSE PRK06598 Asd PRK06728 PRK08040 PRK05671 PRK08664 Semialdhyde_dh Semialdhyde_dhC protein|semialdehyde dehydrogenase, NAD binding domain containing protein, putative, expressed	1.27963
13.1.3.6.1.4	amino acid metabolism.synthesis.aspartate family.misc.homoserine.homoserine kinase	loc_os02g58510.1	Transcript	moderately similar to ( 287) AT2G17265 | Symbols: HSK | HSK (HOMOSERINE KINASE); homoserine kinase | chr2:7508606-7509718 FORWARD PRK01212 ThrB protein|GHMP kinases ATP-binding protein, putative, expressed	4.33094
13.1.4.1	amino acid metabolism.synthesis.branched chain group.common	loc_os01g46380.1	Transcript	highly similar to ( 884) AT3G58610 | Symbols: | ketol-acid reductoisomerase | chr3:21671561-21674639 FORWARDhighly similar to ( 862) ILV5_SPIOL Ketol-acid reductoisomerase, chloroplast precursor (EC 1.1.1.86) (Acetohydroxy-acid reductoisomerase) (Alpha-keto-beta-hydroxylacil reductoisomerase) - Spinacia oleracea (Spinach)IlvC PRK05479 IlvN IlvC PRK05225 protein|ketol-acid reductoisomerase, chloro…	2.26215
13.1.4.1.1	amino acid metabolism.synthesis.branched chain group.common.acetolactate synthase	loc_os11g14950.1	Transcript	highly similar to ( 601) AT2G31810 | Symbols: | acetolactate synthase small subunit, putative | chr2:13524271-13528246 FORWARD ilvH ilvH IlvH ACT_AHAS protein|ACT domain containing protein, expressed	2.78442
13.1.4.1.4	amino acid metabolism.synthesis.branched chain group.common.branched-chain amino acid aminotransferase	loc_os03g12890.5	Transcript	moderately similar to ( 355) AT5G65780 | Symbols: ATBCAT-5 | ATBCAT-5; branched-chain-amino-acid transaminase/ catalytic | chr5:26316418-26318585 FORWARD BCAT_beta_family PRK06606 Aminotran_4 PLPDE_IV IlvE PRK08320 D-AAT_like ADCL_like PRK07544 PRK07849 PRK12479 protein|aminotransferase domain containing protein, putative, expressed	7.9936
13.1.4.1.4	amino acid metabolism.synthesis.branched chain group.common.branched-chain amino acid aminotransferase	loc_os04g47190.2	Transcript	moderately similar to ( 492) AT5G65780 | Symbols: ATBCAT-5 | ATBCAT-5; branched-chain-amino-acid transaminase/ catalytic | chr5:26316418-26318585 FORWARD PRK06606 BCAT_beta_family Aminotran_4 PLPDE_IV IlvE D-AAT_like PRK08320 PRK07544 ADCL_like protein|aminotransferase domain containing protein, putative, expressed	3.04683
13.1.4.4.1	amino acid metabolism.synthesis.branched chain group.leucine specific.2-isopropylmalate synthase	loc_os11g04670.1	Transcript	highly similar to ( 751) AT1G74040 | Symbols: IMS1, MAML-3, IPMS2 | IMS1 (2-ISOPROPYLMALATE SYNTHASE 1); 2-isopropylmalate synthase | chr1:27842258-27845566 FORWARDhighly similar to ( 618) LEU1_SOYBN Probable 2-isopropylmalate synthase (EC 2.3.3.13) (Alpha-isopropylmalate synthase) (Alpha-IPM synthetase) (Late nodulin 56) (N-56) - Glycine max (Soybean) PRK00915 LeuA aksA PRK09389 HMGL-like PRK123…	3.64338
13.1.4.4.1	amino acid metabolism.synthesis.branched chain group.leucine specific.2-isopropylmalate synthase	loc_os12g04440.1	Transcript	highly similar to ( 769) AT1G74040 | Symbols: IMS1, MAML-3, IPMS2 | IMS1 (2-ISOPROPYLMALATE SYNTHASE 1); 2-isopropylmalate synthase | chr1:27842258-27845566 FORWARDhighly similar to ( 627) LEU1_SOYBN Probable 2-isopropylmalate synthase (EC 2.3.3.13) (Alpha-isopropylmalate synthase) (Alpha-IPM synthetase) (Late nodulin 56) (N-56) - Glycine max (Soybean) PRK00915 LeuA aksA PRK09389 HMGL-like PRK123…	3.95372
13.1.4.4.1	amino acid metabolism.synthesis.branched chain group.leucine specific.2-isopropylmalate synthase	loc_os12g04440.2	Transcript	highly similar to ( 736) AT1G74040 | Symbols: IMS1, MAML-3, IPMS2 | IMS1 (2-ISOPROPYLMALATE SYNTHASE 1); 2-isopropylmalate synthase | chr1:27842258-27845566 FORWARDhighly similar to ( 602) LEU1_SOYBN Probable 2-isopropylmalate synthase (EC 2.3.3.13) (Alpha-isopropylmalate synthase) (Alpha-IPM synthetase) (Late nodulin 56) (N-56) - Glycine max (Soybean) PRK00915 LeuA aksA PRK09389 HMGL-like PRK123…	7.24318
13.1.4.5.1	amino acid metabolism.synthesis.branched chain group.isoleucine specific.threonine ammonia-lyase	loc_os03g50510.1	Transcript	highly similar to ( 746) AT3G10050 | Symbols: OMR1 | OMR1 (L-O-METHYLTHREONINE RESISTANT 1); L-threonine ammonia-lyase | chr3:3099164-3101741 REVERSEmoderately similar to ( 423) THD1_CICAR Threonine dehydratase biosynthetic, chloroplast precursor (EC 4.3.1.19) (Threonine deaminase) (TD) - Cicer arietinum (Chickpea) (Garbanzo) PRK09224 PRK12483 IlvA PRK08639 PRK08198 PRK08638 PRK08526 PRK07334 PRK…	5.30296
13.1.5.1.1	amino acid metabolism.synthesis.serine-glycine-cysteine group.serine.phosphoglycerate dehydrogenase	loc_os04g55720.1	Transcript	highly similar to ( 748) AT4G34200 | Symbols: EDA9 | EDA9 (embryo sac development arrest 9); ATP binding | chr4:16374041-16376561 REVERSEvery weakly similar to (94.7) DHGY_CUCSA Glycerate dehydrogenase (EC 1.1.1.29) (NADH-dependent hydroxypyruvate reductase) (HPR) (GDH) - Cucumis sativus (Cucumber) 2-Hacid_dh SerA LdhA 2-Hacid_dh_C PRK11790 PRK06487 PRK06932 PRK08410 PRK07574 PRK00257 PRK08605 PR…	5.42579
13.1.5.2.3	amino acid metabolism.synthesis.serine-glycine-cysteine group.glycine.serine glyoxylate aminotransferase	loc_os08g39300.4	Transcript	highly similar to ( 689) AT2G13360 | Symbols: AGT, AGT1 | AGT (ALANINE:GLYOXYLATE AMINOTRANSFERASE); alanine-glyoxylate transaminase/ serine-glyoxylate transaminase/ serine-pyruvate transaminase | chr2:5539417-5540902 REVERSEweakly similar to ( 105) SGAT_MAIZE Serine--glyoxylate aminotransferase (EC 2.6.1.45) (SGAT) (Alanine--glyoxylate aminotransferase) (EC 2.6.1.44) (AGT) (Fragments) - Zea mays…	4.13702
13.1.5.2.3	amino acid metabolism.synthesis.serine-glycine-cysteine group.glycine.serine glyoxylate aminotransferase	loc_os08g39300.3	Transcript	moderately similar to ( 259) AT2G13360 | Symbols: AGT, AGT1 | AGT (ALANINE:GLYOXYLATE AMINOTRANSFERASE); alanine-glyoxylate transaminase/ serine-glyoxylate transaminase/ serine-pyruvate transaminase | chr2:5539417-5540902 REVERSE COG0075 protein|aminotransferase, putative, expressed	3.45895
13.1.5.2.41	amino acid metabolism.synthesis.serine-glycine-cysteine group.glycine.sarcosine oxidase	loc_os09g32290.2	Transcript	moderately similar to ( 421) AT2G24580 | Symbols: | sarcosine oxidase family protein | chr2:10444928-10446178 REVERSE solA DadA protein|FAD dependent oxidoreductase domain containing protein, expressed	9.29644
13.1.5.2.41	amino acid metabolism.synthesis.serine-glycine-cysteine group.glycine.sarcosine oxidase	loc_os12g35890.1	Transcript	moderately similar to ( 392) AT2G24580 | Symbols: | sarcosine oxidase family protein | chr2:10444928-10446178 REVERSE solA DadA protein|FAD dependent oxidoreductase domain containing protein, expressed	2.64338
13.1.5.3	amino acid metabolism.synthesis.serine-glycine-cysteine group.cysteine	loc_os01g09030.1	Transcript	moderately similar to ( 206) AT5G39890 | Symbols: | unknown protein | chr5:15974543-15976013 FORWARD DUF1637 protein|2-aminoethanethiol dioxygenase, putative, expressed	1.86459
13.1.5.3	amino acid metabolism.synthesis.serine-glycine-cysteine group.cysteine	loc_os09g16910.2	Transcript	highly similar to ( 647) AT5G65720 | Symbols: ATNIFS1, NIFS1, NFS1, ATNFS1 | NFS1; ATP binding / cysteine desulfurase/ transaminase | chr5:26296733-26297710 FORWARD NifS Aminotran_5 PRK02948 csdA PRK09295 PRK10874 GadB protein|cysteine desulfurase 1, mitochondrial precursor, putative, expressed	2.80688
13.1.5.3	amino acid metabolism.synthesis.serine-glycine-cysteine group.cysteine	loc_os03g45250.1	Transcript	weakly similar to ( 196) AT5G39890 | Symbols: | unknown protein | chr5:15974543-15976013 FORWARD DUF1637 protein|2-aminoethanethiol dioxygenase, putative, expressed	-8.9957
13.1.5.3	amino acid metabolism.synthesis.serine-glycine-cysteine group.cysteine	loc_os09g16910.1	Transcript	highly similar to ( 647) AT5G65720 | Symbols: ATNIFS1, NIFS1, NFS1, ATNFS1 | NFS1; ATP binding / cysteine desulfurase/ transaminase | chr5:26296733-26297710 FORWARD NifS Aminotran_5 PRK02948 csdA PRK09295 PRK10874 GadB protein|cysteine desulfurase 1, mitochondrial precursor, putative, expressed	4.32145
13.1.5.3.1	amino acid metabolism.synthesis.serine-glycine-cysteine group.cysteine.OASTL	loc_os06g36880.1	Transcript	moderately similar to ( 324) AT3G59760 | Symbols: OASC, ATCS-C | OASC (O-ACETYLSERINE (THIOL) LYASE ISOFORM C); ATP binding / cysteine synthase | chr3:22072661-22075345 REVERSEmoderately similar to ( 332) CYSKP_SPIOL Cysteine synthase, chloroplast precursor (EC 2.5.1.47) (O-acetylserine sulfhydrylase) (O-acetylserine (Thiol)-lyase) (CSase B) (CS-B) (OAS-TL B) - Spinacia oleracea (Spinach) CysK PR…	2.18539
13.1.5.3.1	amino acid metabolism.synthesis.serine-glycine-cysteine group.cysteine.OASTL	loc_os01g74650.3	Transcript	moderately similar to ( 493) AT3G59760 | Symbols: OASC, ATCS-C | OASC (O-ACETYLSERINE (THIOL) LYASE ISOFORM C); ATP binding / cysteine synthase | chr3:22072661-22075345 REVERSEhighly similar to ( 504) CYSKP_SOLTU Cysteine synthase, chloroplast precursor (EC 2.5.1.47) (O-acetylserine sulfhydrylase) (O-acetylserine (Thiol)-lyase) (CSase B) (CS-B) (OAS-TL B) - Solanum tuberosum (Potato) CysK PRK1071…	-4.57034
13.1.5.3.1	amino acid metabolism.synthesis.serine-glycine-cysteine group.cysteine.OASTL	loc_os06g36840.1	Transcript	moderately similar to ( 335) AT3G59760 | Symbols: OASC, ATCS-C | OASC (O-ACETYLSERINE (THIOL) LYASE ISOFORM C); ATP binding / cysteine synthase | chr3:22072661-22075345 REVERSEmoderately similar to ( 341) CYSKP_SPIOL Cysteine synthase, chloroplast precursor (EC 2.5.1.47) (O-acetylserine sulfhydrylase) (O-acetylserine (Thiol)-lyase) (CSase B) (CS-B) (OAS-TL B) - Spinacia oleracea (Spinach) CysK PR…	-1.90094
13.1.5.3.2	amino acid metabolism.synthesis.serine-glycine-cysteine group.cysteine.SAT	loc_os01g52260.1	Transcript	moderately similar to ( 334) AT5G56760 | Symbols: ATSERAT1;1, SAT5, SAT-52 | ATSERAT1;1 (ARABIDOPSIS THALIANA SERINE ACETYLTRANSFERASE 1;1); serine O-acetyltransferase | chr5:22961498-22962582 REVERSE cysE CysE SATase_N protein|serine acetyltransferase protein, putative, expressed	2.85109
13.1.6.1.1	amino acid metabolism.synthesis.aromatic aa.chorismate.3-deoxy-D-arabino-heptulosonate 7-phosphate synthase	loc_os03g27230.1	Transcript	highly similar to ( 829) AT1G22410 | Symbols: | 2-dehydro-3-deoxyphosphoheptonate aldolase, putative / 3-deoxy-D-arabino-heptulosonate 7-phosphate synthase, putative / DAHP synthetase, putative | chr1:7912120-7914742 FORWARDhighly similar to ( 960) AROF_ORYSA Phospho-2-dehydro-3-deoxyheptonate aldolase 1, chloroplast precursor (EC 2.5.1.54) (Phospho-2-keto-3-deoxyheptonate aldolase 1) (DAHP synth…	-1.39975
13.1.6.1.1	amino acid metabolism.synthesis.aromatic aa.chorismate.3-deoxy-D-arabino-heptulosonate 7-phosphate synthase	loc_os08g37790.1	Transcript	highly similar to ( 812) AT1G22410 | Symbols: | 2-dehydro-3-deoxyphosphoheptonate aldolase, putative / 3-deoxy-D-arabino-heptulosonate 7-phosphate synthase, putative / DAHP synthetase, putative | chr1:7912120-7914742 FORWARDhighly similar to ( 811) AROF_SOLTU Phospho-2-dehydro-3-deoxyheptonate aldolase 1, chloroplast precursor (EC 2.5.1.54) (Phospho-2-keto-3-deoxyheptonate aldolase 1) (DAHP synth…	2.39139
13.1.6.1.1	amino acid metabolism.synthesis.aromatic aa.chorismate.3-deoxy-D-arabino-heptulosonate 7-phosphate synthase	loc_os07g42960.1	Transcript	highly similar to ( 828) AT1G22410 | Symbols: | 2-dehydro-3-deoxyphosphoheptonate aldolase, putative / 3-deoxy-D-arabino-heptulosonate 7-phosphate synthase, putative / DAHP synthetase, putative | chr1:7912120-7914742 FORWARDnearly identical (1040) AROG_ORYSA Phospho-2-dehydro-3-deoxyheptonate aldolase 2, chloroplast precursor (EC 2.5.1.54) (Phospho-2-keto-3-deoxyheptonate aldolase 2) (DAHP synthe…	-3.62497
13.1.6.1.2	amino acid metabolism.synthesis.aromatic aa.chorismate.3-dehydroquinate synthase	loc_os09g36800.1	Transcript	highly similar to ( 616) AT5G66120 | Symbols: | 3-dehydroquinate synthase, putative | chr5:26431516-26433649 REVERSE aroB AroB DHQ_synthase aroB protein|3-dehydroquinate synthase, putative, expressed	-3.94084
13.1.6.1.5	amino acid metabolism.synthesis.aromatic aa.chorismate.shikimate kinase	loc_os01g01302.1	Transcript	weakly similar to ( 155) AT3G26900 | Symbols: | shikimate kinase family protein | chr3:9912314-9914424 REVERSE protein|shikimate kinase, putative, expressed	-3.85098
13.1.6.2	amino acid metabolism.synthesis.aromatic aa.phenylalanine and tyrosine	loc_os01g08270.4	Transcript	moderately similar to ( 270) AT1G80360 | Symbols: | aminotransferase class I and II family protein | chr1:30208736-30210643 REVERSE PRK05957 COG0436 PRK07550 Aminotran_1_2 PRK06056 PRK07212 PRK07568 PRK07367 PRK08362 PRK05794 PRK08443 protein|aminotransferase, classes I and II, domain containing protein, expressed	6.61423
13.1.6.3.1	amino acid metabolism.synthesis.aromatic aa.phenylalanine.arogenate dehydratase / prephenate dehydratase	loc_os09g39260.1	Transcript	moderately similar to ( 483) AT2G27820 | Symbols: PD1, ADT3 | PD1 (PREPHENATE DEHYDRATASE 1); arogenate dehydratase/ prephenate dehydratase | chr2:11856808-11858082 FORWARD PheA PRK11898 PRK11899 PDT pheA ACT_CM-PDT protein|prephenate dehydratase domain containing protein, expressed	-3.21549
13.1.6.3.1	amino acid metabolism.synthesis.aromatic aa.phenylalanine.arogenate dehydratase / prephenate dehydratase	loc_os04g33390.1	Transcript	highly similar to ( 552) AT1G08250 | Symbols: ADT6 | ADT6 (arogenate dehydratase 6); arogenate dehydratase/ prephenate dehydratase | chr1:2588994-2590235 REVERSE PheA PRK11899 PRK11898 PDT pheA ACT_CM-PDT ACT_AAAH-PDT-like protein|prephenate dehydratase domain containing protein, expressed	-4.42155
13.1.6.5	amino acid metabolism.synthesis.aromatic aa.tryptophan	loc_os04g58720.1	Transcript	nearly identical (1406) AT4G11610 | Symbols: | C2 domain-containing protein | chr4:7013956-7017846 REVERSEPRT_C protein|anthranilate phosphoribosyltransferase, putative, expressed	-2.12759
13.1.6.5	amino acid metabolism.synthesis.aromatic aa.tryptophan	loc_os04g59520.1	Transcript	nearly identical (1010) AT1G22610 | Symbols: | C2 domain-containing protein | chr1:7994478-7997567 FORWARDPRT_C C2 C2 C2 C2_1 protein|anthranilate phosphoribosyltransferase, putative, expressed	-1.78898
13.1.6.5.1	amino acid metabolism.synthesis.aromatic aa.tryptophan.anthranilate synthase	loc_os06g48620.1	Transcript	highly similar to ( 925) AT2G28880 | Symbols: emb1997 | emb1997 (embryo defective 1997); anthranilate synthase/ catalytic/ oxo-acid-lyase | chr2:12398937-12403108 REVERSE TrpE Chorismate_bind PRK07508 PRK09070 PRK05940 GATase1_Anthranilate_Synthase PabA PRK05877 PRK05780 PRK06404 trpG PRK06774 PRK07649 PRK07765 PRK08857 PRK05670 PRK06968 PRK08746 PRK07093 PRK08702 PRK08007 PRK06401 GATase MenF PR…	-2.48201
13.1.6.5.1	amino acid metabolism.synthesis.aromatic aa.tryptophan.anthranilate synthase	loc_os04g38950.1	Transcript	moderately similar to ( 342) AT5G57890 | Symbols: | anthranilate synthase beta subunit, putative | chr5:23447648-23449622 REVERSE trpG GATase1_Anthranilate_Synthase PabA PRK07649 PRK08702 PRK06968 PRK05670 PRK08746 PRK05780 PRK08007 PRK07765 PRK08857 PRK06774 GATase PRK06679 PRK08544 PRK07255 PRK06896 PRK08856 PRK06895 PRK06401 PRK06773 PRK09522 GATase1_GMP_Synthase PRK05637 guaA PRK12838 PRK0075…	-2.90135
13.1.6.5.5	amino acid metabolism.synthesis.aromatic aa.tryptophan.tryptophan synthase	loc_os03g58300.1	Transcript	moderately similar to ( 287) AT4G02610 | Symbols: | tryptophan synthase, alpha subunit, putative | chr4:1147662-1149217 FORWARDmoderately similar to ( 332) TRPA_MAIZE Indole-3-glycerol phosphate lyase, chloroplast precursor (EC 4.1.2.8) (Indole synthase) (Tryptophan synthase alpha chain) (EC 4.2.1.20) (Benzoxazineless 1) - Zea mays (Maize) trp_synt_A Trp_syntA Tryptophan_synthase_alpha TrpA prote…	-3.15428
13.1.6.5.5	amino acid metabolism.synthesis.aromatic aa.tryptophan.tryptophan synthase	loc_os07g08430.1	Transcript	moderately similar to ( 334) AT4G02610 | Symbols: | tryptophan synthase, alpha subunit, putative | chr4:1147662-1149217 FORWARDmoderately similar to ( 297) TRPA_MAIZE Indole-3-glycerol phosphate lyase, chloroplast precursor (EC 4.1.2.8) (Indole synthase) (Tryptophan synthase alpha chain) (EC 4.2.1.20) (Benzoxazineless 1) - Zea mays (Maize) trp_synt_A Trp_syntA Tryptophan_synthase_alpha TrpA prote…	1.10644
13.1.6.5.5	amino acid metabolism.synthesis.aromatic aa.tryptophan.tryptophan synthase	loc_os03g58290.1	Transcript	moderately similar to ( 306) AT4G02610 | Symbols: | tryptophan synthase, alpha subunit, putative | chr4:1147662-1149217 FORWARDmoderately similar to ( 348) TRPA_MAIZE Indole-3-glycerol phosphate lyase, chloroplast precursor (EC 4.1.2.8) (Indole synthase) (Tryptophan synthase alpha chain) (EC 4.2.1.20) (Benzoxazineless 1) - Zea mays (Maize) Trp_syntA trp_synt_A Tryptophan_synthase_alpha TrpA prote…	-7.02285
13.1.7	amino acid metabolism.synthesis.histidine	loc_os01g13190.1	Transcript	highly similar to ( 703) AT5G63890 | Symbols: ATHDH | ATHDH (HISTIDINOL DEHYDROGENASE); histidinol dehydrogenase | chr5:25565600-25568104 REVERSEhighly similar to ( 863) HISX_ORYSA Histidinol dehydrogenase, chloroplast precursor (EC 1.1.1.23) (HDH) - Oryza sativa (Rice) Histidinol_dh hisD HisD PRK12447 protein|histidinol dehydrogenase, chloroplast precursor, putative, expressed	1.60156
13.2.2.2	amino acid metabolism.degradation.glutamate family.proline	loc_os10g40360.1	Transcript	moderately similar to ( 356) AT5G38710 | Symbols: | proline oxidase, putative / osmotic stress-responsive proline dehydrogenase, putative | chr5:15501340-15503899 FORWARD Pro_dh PRK11904 protein|proline oxidase, mitochondrial precursor, putative, expressed	-2.62497
13.2.2.2	amino acid metabolism.degradation.glutamate family.proline	loc_os12g40440.1	Transcript	weakly similar to ( 129) AT5G62530 | Symbols: ALDH12A1, ATP5CDH, P5CDH | ALDH12A1; 1-pyrroline-5-carboxylate dehydrogenase/ 3-chloroallyl aldehyde dehydrogenase | chr5:25099768-25103159 REVERSE protein|expressed protein	1.96557
13.2.2.3	amino acid metabolism.degradation.glutamate family.arginine	loc_os05g49050.1	Transcript	moderately similar to ( 453) AT2G34470 | Symbols: UREG, PSKF109 | UREG (UREASE ACCESSORY PROTEIN G); ATP binding / metal ion binding / nickel ion binding / nucleotide binding | chr2:14530900-14532411 REVERSEHypB cobW protein|CobW/P47K family protein, putative, expressed	2.75898
13.2.2.3	amino acid metabolism.degradation.glutamate family.arginine	loc_os04g01590.1	Transcript	highly similar to ( 565) AT4G08900 | Symbols: | arginase | chr4:5703499-5705180 FORWARDhighly similar to ( 501) ARGI_SOYBN Arginase (EC 3.5.3.1) - Glycine max (Soybean) Arginase SpeB PRK01722 PRK02190 protein|arginase, putative, expressed	1.39054
13.2.3.1.1	amino acid metabolism.degradation.aspartate family.asparagine.L-asparaginase	loc_os04g55710.1	Transcript	moderately similar to ( 486) AT3G16150 | Symbols: | L-asparaginase, putative / L-asparagine amidohydrolase, putative | chr3:5471794-5473033 FORWARDmoderately similar to ( 342) ASPG_LUPLU L-asparaginase precursor (EC 3.5.1.1) (L-asparagine amidohydrolase) [Contains: L-asparaginase subunit alpha; L-asparaginase subunit beta] - Lupinus luteus (European yellow lupin) Asparaginase_2 Asparaginase_2 COG…	-7.43153
13.2.3.2	amino acid metabolism.degradation.aspartate family.threonine	loc_os03g50510.1	Transcript	highly similar to ( 746) AT3G10050 | Symbols: OMR1 | OMR1 (L-O-METHYLTHREONINE RESISTANT 1); L-threonine ammonia-lyase | chr3:3099164-3101741 REVERSEmoderately similar to ( 423) THD1_CICAR Threonine dehydratase biosynthetic, chloroplast precursor (EC 4.3.1.19) (Threonine deaminase) (TD) - Cicer arietinum (Chickpea) (Garbanzo) PRK09224 PRK12483 IlvA PRK08639 PRK08198 PRK08638 PRK08526 PRK07334 PRK…	5.30296
13.2.3.4	amino acid metabolism.degradation.aspartate family.methionine	loc_os01g49330.1	Transcript	moderately similar to ( 427) AT1G66520 | Symbols: pde194 | pde194 (pigment defective 194); catalytic/ formyltetrahydrofolate deformylase/ hydroxymethyl-, formyl- and related transferase | chr1:24816330-24818693 REVERSE fmt Fmt PRK08125 Formyl_trans_N PurN purN PRK06988 protein|formyl transferase, putative, expressed	-2.45365
13.2.3.5	amino acid metabolism.degradation.aspartate family.lysine	loc_os01g40630.2	Transcript	moderately similar to ( 236) AT3G53450 | Symbols: | unknown protein | chr3:19812977-19815430 REVERSELysine_decarbox COG1611 protein|uncharacterized protein PA4923, putative, expressed	-4.96626
13.2.3.5	amino acid metabolism.degradation.aspartate family.lysine	loc_os01g40630.3	Transcript	weakly similar to ( 167) AT3G53450 | Symbols: | unknown protein | chr3:19812977-19815430 REVERSELysine_decarbox COG1611 protein|uncharacterized protein PA4923, putative, expressed	-4.1903
13.2.3.5	amino acid metabolism.degradation.aspartate family.lysine	loc_os02g54254.1	Transcript	nearly identical (1347) AT4G33150 | Symbols: | lysine-ketoglutarate reductase/saccharopine dehydrogenase bifunctional enzyme | chr4:15985479-15988055 REVERSE Saccharop_dh LYS9 Saccharop_dh_N AlaDh_PNT_C AlaDh_PNT_N protein|saccharopine dehydrogenase, putative, expressed	5.16141
13.2.3.5	amino acid metabolism.degradation.aspartate family.lysine	loc_os09g37540.1	Transcript	moderately similar to ( 265) AT4G35190 | Symbols: | unknown protein | chr4:16746724-16748090 FORWARDLysine_decarbox COG1611 protein|uncharacterized protein PA4923, putative, expressed	1.59304
13.2.3.5	amino acid metabolism.degradation.aspartate family.lysine	loc_os01g40630.1	Transcript	moderately similar to ( 308) AT3G53450 | Symbols: | unknown protein | chr3:19812977-19815430 REVERSELysine_decarbox COG1611 protein|uncharacterized protein PA4923, putative, expressed	-3.90737
13.2.4.1	amino acid metabolism.degradation.branched-chain group.shared	loc_os01g21160.3	Transcript	moderately similar to ( 372) AT3G06850 | Symbols: BCE2, LTA1, DIN3 | BCE2; acetyltransferase/ alpha-ketoacid dehydrogenase/ dihydrolipoamide branched chain acyltransferase | chr3:2158212-2160465 REVERSE PRK11855 PRK11856 AceF aceF 2-oxoacid_dh PRK11857 PRK05704 protein|2-oxo acid dehydrogenases acyltransferase domain containing protein, expressed	7.34904
13.2.4.1	amino acid metabolism.degradation.branched-chain group.shared	loc_os01g21160.4	Transcript	moderately similar to ( 375) AT3G06850 | Symbols: BCE2, LTA1, DIN3 | BCE2; acetyltransferase/ alpha-ketoacid dehydrogenase/ dihydrolipoamide branched chain acyltransferase | chr3:2158212-2160465 REVERSE PRK11855 PRK11856 AceF aceF 2-oxoacid_dh PRK11857 PRK05704 protein|2-oxo acid dehydrogenases acyltransferase domain containing protein, expressed	8.64548
13.2.4.1	amino acid metabolism.degradation.branched-chain group.shared	loc_os02g57260.1	Transcript	highly similar to ( 564) AT2G33150 | Symbols: PKT3, PED1, KAT2 | PKT3 (PEROXISOMAL 3-KETOACYL-COA THIOLASE 3); acetyl-CoA C-acyltransferase | chr2:14047814-14050983 REVERSE thiolase PRK09052 PRK07661 PRK07108 PRK09051 PRK06845 fadA PRK06445 PRK05790 PRK08234 PRK06205 PaaJ PRK07491 PRK07025 PRK07851 PRK08242 PRK05656 PRK09050 PRK07124 PRK07800 PRK06689 PRK08235 PRK07850 PRK06633 Thiolase_N PRK0817…	1.88834
13.2.4.4	amino acid metabolism.degradation.branched-chain group.leucine	loc_os12g41250.1	Transcript	highly similar to ( 892) AT1G03090 | Symbols: MCCA | MCCA; methylcrotonoyl-CoA carboxylase | chr1:739715-743819 FORWARDnearly identical (1280) MCCA_ORYSA Methylcrotonoyl-CoA carboxylase subunit alpha, mitochondrial precursor (EC 6.4.1.4) (3-methylcrotonyl-CoA carboxylase 1) (MCCase subunit alpha) (3-methylcrotonyl-CoA:carbon dioxide ligase subunit alpha) - Oryza sativa (Rice) COG4770 PRK08591 PRK…	4.31001
13.2.4.4	amino acid metabolism.degradation.branched-chain group.leucine	loc_os08g32850.1	Transcript	highly similar to ( 810) AT4G34030 | Symbols: MCCB | MCCB (3-METHYLCROTONYL-COA CARBOXYLASE); biotin carboxylase/ methylcrotonoyl-CoA carboxylase | chr4:16301298-16303949 FORWARD COG4799 Carboxyl_trans protein|methylcrotonoyl-CoA carboxylase beta chain, mitochondrial precursor, putative, expressed	3.18934
13.2.5.2	amino acid metabolism.degradation.serine-glycine-cysteine group.glycine	loc_os01g51410.1	Transcript	nearly identical (1620) AT2G26080 | Symbols: AtGLDP2 | AtGLDP2 (Arabidopsis thaliana glycine decarboxylase P-protein 2); ATP binding / glycine dehydrogenase (decarboxylating) | chr2:11109330-11113786 REVERSEnearly identical (1623) GCSP_SOLTU Glycine dehydrogenase [decarboxylating], mitochondrial precursor (EC 1.4.4.2) (Glycine decarboxylase) (Glycine cleavage system P-protein) - Solanum tuberosum…	-3.13155
13.2.5.2	amino acid metabolism.degradation.serine-glycine-cysteine group.glycine	loc_os04g53230.1	Transcript	highly similar to ( 637) AT1G11860 | Symbols: | aminomethyltransferase, putative | chr1:4001801-4003245 FORWARDhighly similar to ( 657) GCST_SOLTU Aminomethyltransferase, mitochondrial precursor (EC 2.1.2.10) (Glycine cleavage system T protein) (GCVT) - Solanum tuberosum (Potato) gcvT GcvT GCV_T dmdA GCV_T_C protein|aminomethyltransferase, putative, expressed	-5.61112
13.2.5.3	amino acid metabolism.degradation.serine-glycine-cysteine group.cysteine	loc_os12g41500.1	Transcript	moderately similar to ( 498) AT1G79230 | Symbols: ST1, ATMST1, MST1, ATRDH1 | MST1 (MERCAPTOPYRUVATE SULFURTRANSFERASE 1); 3-mercaptopyruvate sulfurtransferase/ sulfurtransferase/ thiosulfate sulfurtransferase | chr1:29801358-29803679 FORWARD SseA sseA TST_Repeat_1 TST_Repeat_2 TST_Repeats PRK09629 Rhodanese protein|rhodanese-like domain containing protein, putative, expressed	1.25876
13.2.6.2	amino acid metabolism.degradation.aromatic aa.tyrosine	loc_os11g35040.1	Transcript	moderately similar to ( 486) AT5G53970 | Symbols: | aminotransferase, putative | chr5:21910676-21912594 FORWARD COG0436 PRK09265 PRK08363 PRK05794 Aminotran_1_2 PRK06108 ARO8 PRK06056 PRK07212 PRK05764 PRK07568 PRK08443 PRK07367 PRK08069 PRK07337 PRK07309 PRK08362 MalY PRK06348 PRK06836 PRK07543 PRK06855 PRK08361 PRK07324 PRK07310 PRK05957 PRK07777 PRK08912 PRK08960 PRK09276 PRK07682 PRK06507 PRK…	-2.87495
13.2.6.2	amino acid metabolism.degradation.aromatic aa.tyrosine	loc_os06g01360.1	Transcript	highly similar to ( 707) AT5G54080 | Symbols: HGO | HGO (HOMOGENTISATE 1,2-DIOXYGENASE); homogentisate 1,2-dioxygenase | chr5:21945920-21948070 FORWARDhighly similar to ( 920) HGD_ORYSA Homogentisate 1,2-dioxygenase (EC 1.13.11.5) (Homogentisicase) (Homogentisate oxygenase) (Homogentisic acid oxidase) - Oryza sativa (Rice) PRK05341 HgmA HmgA protein|homogentisate 1,2-dioxygenase, putative, expres…	4.89434
13.2.6.2	amino acid metabolism.degradation.aromatic aa.tyrosine	loc_os02g19924.1	Transcript	moderately similar to ( 473) AT5G36160 | Symbols: | aminotransferase-related | chr5:14233261-14235129 REVERSE COG0436 PRK09265 PRK08363 Aminotran_1_2 PRK08069 PRK07568 PRK05794 PRK08443 PRK06056 PRK05764 PRK07212 PRK07367 PRK06108 PRK08362 PRK06348 ARO8 PRK07310 PRK06836 PRK07682 PRK06507 PRK07324 PRK07777 PRK07543 PRK08912 PRK06375 PRK06855 PRK05957 PRK07309 MalY PRK07683 PRK08361 PRK06575 PRK07…	1.59282
13.2.6.3	amino acid metabolism.degradation.aromatic aa.tryptophan	loc_os01g70090.1	Transcript	moderately similar to ( 256) AT5G43280 | Symbols: ATDCI1 | ATDCI1 (DELTA(3,5),DELTA(2,4)-DIENOYL-COA ISOMERASE 1); delta3,5-delta2,4-dienoyl-CoA isomerase/ enoyl-CoA hydratase | chr5:17367947-17368750 FORWARD PRK06142 PRK07817 CaiD PRK07509 PRK07658 PRK09245 PRK08139 PRK08258 PRK06563 PRK07510 PRK07799 PRK06210 PRK07657 PRK08138 PRK05809 PRK06494 PRK08260 PRK08252 ECH PRK06688 PRK08140 PRK03580 P…	3.5119
13.2.6.3	amino acid metabolism.degradation.aromatic aa.tryptophan	loc_os03g19680.1	Transcript	moderately similar to ( 328) AT4G16210 | Symbols: ECHIA, E-COAH-2 | ECHIA (ENOYL-COA HYDRATASE/ISOMERASE A); catalytic | chr4:9176864-9177978 REVERSE PRK06190 CaiD PRK08138 PRK05809 PRK07628 PRK08140 PRK05979 PRK05862 PRK07657 PRK07799 ECH PRK06688 PRK07510 PRK06210 PRK05870 PRK08252 PRK09245 PRK07327 PRK07658 PRK07511 PRK08260 PRK07830 PRK07509 PRK09674 PRK08139 PRK07629 PRK05864 PRK06563 PRK060…	4.22846
13.2.6.3	amino acid metabolism.degradation.aromatic aa.tryptophan	loc_os10g40540.1	Transcript	moderately similar to ( 414) AT4G31810 | Symbols: | enoyl-CoA hydratase/isomerase family protein | chr4:15387365-15390290 REVERSE PRK06493 PRK06952 PRK06028 PRK07828 PRK07759 PRK05617 CaiD ECH protein|enoyl-CoA hydratase/isomerase family protein, putative, expressed	2.05199
13.2.7	amino acid metabolism.degradation.histidine	loc_os02g33710.1	Transcript	highly similar to ( 793) AT1G43710 | Symbols: emb1075 | emb1075 (embryo defective 1075); carboxy-lyase/ catalytic/ pyridoxal phosphate binding | chr1:16486534-16488298 REVERSE PRK02769 GadB Pyridoxal_deC protein|decarboxylase, putative, expressed	3.37943
13.99	amino acid metabolism.misc	loc_os02g49690.1	Transcript	very weakly similar to (96.3) AT4G22780 | Symbols: ACR7 | ACR7; amino acid binding | chr4:11968696-11970956 REVERSEACT_ACR_2 protein|ACT domain-containing protein, putative, expressed	2.69996
13.99	amino acid metabolism.misc	loc_os03g40100.1	Transcript	moderately similar to ( 491) AT1G69040 | Symbols: ACR4 | ACR4 (ACT REPEAT 4); amino acid binding | chr1:25957843-25960079 FORWARDACT_ACR_3 ACT_ACR_4 ACT_ACR_2 ACT_ACR_1 PRK05092 protein|ACT domain containing protein, expressed	-2.88397
13.99	amino acid metabolism.misc	loc_os04g57400.1	Transcript	highly similar to ( 652) AT1G49820 | Symbols: ATMTK | ATMTK (ARABIDOPSIS THALIANA S-METHYL-5-THIORIBOSE KINASE); S-methyl-5-thioribose kinase | chr1:18443005-18444907 FORWARDmtnK COG4857 PRK12396 protein|methylthioribose kinase, putative, expressed	2.38309
14.1	S-assimilation.ATPS	loc_os04g02050.1	Transcript	highly similar to ( 620) AT1G19920 | Symbols: APS2, ASA1 | APS2; sulfate adenylyltransferase (ATP) | chr1:6914835-6916657 REVERSE ATP-sulfurylase ATPS sat MET3 PRK05537 PanC_ATPS protein|bifunctional 3-phosphoadenosine 5-phosphosulfate synthetase, putative, expressed	-6.20015
14.1	S-assimilation.ATPS	loc_os04g02050.2	Transcript	highly similar to ( 561) AT1G19920 | Symbols: APS2, ASA1 | APS2; sulfate adenylyltransferase (ATP) | chr1:6914835-6916657 REVERSE ATP-sulfurylase ATPS sat MET3 PRK05537 PanC_ATPS protein|bifunctional 3-phosphoadenosine 5-phosphosulfate synthetase, putative, expressed	-5.40041
14.2	S-assimilation.APR	loc_os07g32570.2	Transcript	highly similar to ( 564) AT4G21990 | Symbols: APR3, PRH-26, PRH26, ATAPR3 | APR3 (APS REDUCTASE 3); adenylyl-sulfate reductase | chr4:11657284-11658973 REVERSE PRK02090 CysH PAPS_reduct PDI_a_APS_reductase PAPS_reductase PDI_a_family protein|OsAPRL1 adenosine 5'-phosphosulfate reductase-like OsAPRL1, expressed	-9.25644
14.5	S-assimilation.sulfite oxidase	loc_os08g41830.1	Transcript	highly similar to ( 634) AT3G01910 | Symbols: SOX, AT-SO, AtSO | SOX (SULFITE OXIDASE); sulfite oxidase | chr3:314919-317053 REVERSEmoderately similar to ( 212) NIA2_PHAVU Nitrate reductase [NADH] 2 (EC 1.7.1.1) (NR-2) - Phaseolus vulgaris (Kidney bean) (French bean) eukary_SO_Moco SO_family_Moco_dimer eukary_NR_Moco Oxidored_molyb SO_family_Moco bact_SorA_Moco Mo-co_dimer bact_SoxC_Moco COG2041 …	-1.19021
14.15	S-assimilation.AKN	loc_os03g10500.1	Transcript	moderately similar to ( 275) AT3G03900 | Symbols: | adenylylsulfate kinase, putative | chr3:1002975-1004271 REVERSEmoderately similar to ( 274) KAPS_CATRO Adenylyl-sulfate kinase, chloroplast precursor (EC 2.7.1.25) (APS kinase) (Adenosine-5'-phosphosulfate kinase) (ATP adenosine-5'-phosphosulfate 3'-phosphotransferase) - Catharanthus roseus (Rosy periwinkle) (Madagascar periwinkle) APSK APS_kina…	-4.15248
15	metal handling	loc_os01g68770.1	Transcript	highly similar to ( 770) AT4G14030 | Symbols: SBP1 | SBP1 (selenium-binding protein 1); selenium binding | chr4:8098121-8100165 REVERSE SBP56 protein|selenium-binding protein, putative, expressed	4.77539
15.1	metal handling.acquisition	loc_os04g36720.1	Transcript	highly similar to ( 692) AT5G49740 | Symbols: ATFRO7, FRO7 | ATFRO7 (FERRIC REDUCTION OXIDASE 7); ferric-chelate reductase/ oxidoreductase | chr5:20205549-20208628 REVERSE Ferric_reduct protein|ferric-chelate reductase, putative, expressed	-6.43337
15.2	metal handling.binding, chelation and storage	loc_os03g17870.1	Transcript	protein|metallothionein, putative, expressed	5.85252
15.2	metal handling.binding, chelation and storage	loc_os01g05650.1	Transcript	protein|metallothionein, putative, expressed	-2.50298
15.2	metal handling.binding, chelation and storage	loc_os03g19427.1	Transcript	moderately similar to ( 288) AT1G56430 | Symbols: ATNAS4, NAS4 | NAS4 (NICOTIANAMINE SYNTHASE 4); nicotianamine synthase | chr1:21137023-21137997 FORWARDhighly similar to ( 570) NAS1_ORYSA Nicotianamine synthase 1 (EC 2.5.1.43) (S-adenosyl-L-methionine:S-adenosyl-L-methionine:S-adenosyl-methionine 3-amino-3-carboxypropyltransferase 1) (OsNAS1) - Oryza sativa (Rice)NAS protein|nicotianamine syntha…	-3.70092
15.2	metal handling.binding, chelation and storage	loc_os04g17100.2	Transcript	weakly similar to ( 182) AT5G66110 | Symbols: | metal ion binding | chr5:26430245-26430778 FORWARD protein|heavy metal-associated domain containing protein, expressed	-8.41092
15.2	metal handling.binding, chelation and storage	loc_os03g19420.2	Transcript	moderately similar to ( 290) AT1G09240 | Symbols: NAS3, ATNAS3 | NAS3 (NICOTIANAMINE SYNTHASE 3); nicotianamine synthase | chr1:2984950-2985912 FORWARDhighly similar to ( 568) NAS2_ORYSA Nicotianamine synthase 2 (EC 2.5.1.43) (S-adenosyl-L-methionine:S-adenosyl-L-methionine:S-adenosyl-methionine 3-amino-3-carboxypropyltransferase 2) (OsNAS2) - Oryza sativa (Rice)NAS protein|nicotianamine synthase…	-2.94801
15.2	metal handling.binding, chelation and storage	loc_os08g31340.1	Transcript	very weakly similar to (94.7) AT2G28660 | Symbols: | copper-binding family protein | chr2:12295419-12296944 FORWARD protein|heavy metal-associated domain containing protein, expressed	3.58448
15.2	metal handling.binding, chelation and storage	loc_os03g02860.1	Transcript	moderately similar to ( 203) AT2G18196 | Symbols: | metal ion binding | chr2:7920793-7922268 REVERSE protein|heavy metal-associated domain containing protein, expressed	6.40428
15.2	metal handling.binding, chelation and storage	loc_os07g20340.1	Transcript	very weakly similar to (95.9) AT5G63530 | Symbols: ATFP3, FP3 | ATFP3; metal ion binding / transition metal ion binding | chr5:25433423-25435614 FORWARD protein|heavy metal-associated domain containing protein, expressed	-2.45991
15.2	metal handling.binding, chelation and storage	loc_os04g17100.1	Transcript	weakly similar to ( 188) AT5G66110 | Symbols: | metal ion binding | chr5:26430245-26430778 FORWARD protein|heavy metal-associated domain containing protein, expressed	-3.80783
15.2	metal handling.binding, chelation and storage	loc_os04g32030.1	Transcript	weakly similar to ( 160) AT5G50740 | Symbols: | metal ion binding | chr5:20635983-20637970 REVERSE protein|heavy metal-associated domain containing protein, expressed	5.03514
15.2	metal handling.binding, chelation and storage	loc_os09g25314.1	Transcript	very weakly similar to (82.8) AT3G15352 | Symbols: ATCOX17, COX17 | ATCOX17; copper chaperone | chr3:5180266-5180490 FORWARD protein|cytochrome c oxidase copper chaperone, putative, expressed	1.04196
15.2	metal handling.binding, chelation and storage	loc_os03g08800.1	Transcript	weakly similar to ( 182) AT2G33740 | Symbols: CUTA | CUTA; copper ion binding | chr2:14269590-14271523 FORWARD CutA1 CutA PRK10645 protein|CutA, chloroplast precursor, putative, expressed	2.115
15.2	metal handling.binding, chelation and storage	loc_os07g48980.1	Transcript	moderately similar to ( 246) AT1G09240 | Symbols: NAS3, ATNAS3 | NAS3 (NICOTIANAMINE SYNTHASE 3); nicotianamine synthase | chr1:2984950-2985912 FORWARDmoderately similar to ( 495) NAS3_ORYSA Nicotianamine synthase 3 (EC 2.5.1.43) (S-adenosyl-L-methionine:S-adenosyl-L-methionine:S-adenosyl-methionine 3-amino-3-carboxypropyltransferase 3) (OsNAS3) - Oryza sativa (Rice)NAS protein|nicotianamine synt…	-9.4827
15.2	metal handling.binding, chelation and storage	loc_os10g14870.1	Transcript	weakly similar to ( 126) AT5G50740 | Symbols: | metal ion binding | chr5:20635983-20637970 REVERSE protein|heavy metal-associated domain containing protein, expressed	-2.91609
15.3	metal handling.regulation	loc_os10g28360.1	Transcript	moderately similar to ( 239) AT5G43850 | Symbols: ATARD4, ARD4 | ARD4; acireductone dioxygenase [iron(II)-requiring]/ metal ion binding | chr5:17627364-17629122 REVERSEmoderately similar to ( 368) ARD4_ORYSA 1,2-dihydroxy-3-keto-5-methylthiopentene dioxygenase 4 (EC 1.13.-.-) (Aci-reductone dioxygenase 4) - Oryza sativa (Rice) ARD COG1791 protein|1,2-dihydroxy-3-keto-5-methylthiopentene dioxygena…	-3.77295
16.1	secondary metabolism.isoprenoids	loc_os05g05940.1	Transcript	weakly similar to ( 168) AT3G05500 | Symbols: | rubber elongation factor (REF) family protein | chr3:1593540-1594802 FORWARDmoderately similar to ( 318) Y5940_ORYSA Putative REF/SRPP-like protein Os05g0151300 - Oryza sativa (Rice)REF protein|stress-related protein, putative, expressed	-1.75869
16.1.1	secondary metabolism.isoprenoids.non-mevalonate pathway	loc_os02g51080.1	Transcript	highly similar to ( 637) AT1G74470 | Symbols: | geranylgeranyl reductase | chr1:27991248-27992845 FORWARDFixC UbiH protein|FAD binding domain containing protein, expressed	-5.24406
16.1.1	secondary metabolism.isoprenoids.non-mevalonate pathway	loc_os06g46380.1	Transcript	moderately similar to ( 441) AT4G24490 | Symbols: | protein prenyltransferase | chr4:12655330-12658103 REVERSEvery weakly similar to (85.1) PFTA_PEA Protein farnesyltransferase/geranylgeranyltransferase type I alpha subunit (EC 2.5.1.58) (EC 2.5.1.59) (CAAX farnesyltransferase alpha subunit) (Ras proteins prenyltransferase alpha) (FTase-alpha) (Type I protein geranyl-geranyltransferas BET4 protei…	1.09197
16.1.1.1	secondary metabolism.isoprenoids.non-mevalonate pathway.DXS	loc_os05g33840.1	Transcript	nearly identical (1150) AT4G15560 | Symbols: CLA1, DEF, CLA, DXS, DXPS2 | CLA1 (CLOROPLASTOS ALTERADOS 1); 1-deoxy-D-xylulose-5-phosphate synthase | chr4:8884218-8887254 FORWARDnearly identical (1393) DXS_ORYSA Probable 1-deoxy-D-xylulose-5-phosphate synthase, chloroplast precursor (EC 2.2.1.7) (1-deoxyxylulose-5-phosphate synthase) (DXP synthase) (DXPS) - Oryza sativa (Rice) PRK05444 Dxs PRK1257…	-2.23735
16.1.1.3	secondary metabolism.isoprenoids.non-mevalonate pathway.CMS	loc_os01g66360.1	Transcript	moderately similar to ( 340) AT2G02500 | Symbols: ISPD, ATMEPCT, MCT | ISPD; 2-C-methyl-D-erythritol 4-phosphate cytidylyltransferase | chr2:671054-673124 REVERSEispD IspD IspD ispDF protein|2-C-methyl-D-erythritol 4-phosphate cytidylyltransferase, putative, expressed	-3.64434
16.1.1.6	secondary metabolism.isoprenoids.non-mevalonate pathway.HDS	loc_os02g39160.1	Transcript	nearly identical (1203) AT5G60600 | Symbols: GCPE, ISPG, CSB3, CLB4, HDS | HDS (4-HYDROXY-3-METHYLBUT-2-ENYL DIPHOSPHATE SYNTHASE); 4 iron, 4 sulfur cluster binding / 4-hydroxy-3-methylbut-2-en-1-yl diphosphate synthase | chr5:24359447-24363019 FORWARDPRK00694 PRK02048 gcpE ispG GcpE protein|hydroxymethylbutenyl 4-diphosphate synthase, putative, expressed	-4.36718
16.1.1.7	secondary metabolism.isoprenoids.non-mevalonate pathway.HDR	loc_os03g52170.1	Transcript	highly similar to ( 695) AT4G34350 | Symbols: CLB6, ISPH, HDR | HDR (4-HYDROXY-3-METHYLBUT-2-ENYL DIPHOSPHATE REDUCTASE); 4-hydroxy-3-methylbut-2-en-1-yl diphosphate reductase/ 4-hydroxy-3-methylbut-2-en-1-yl diphosphate synthase | chr4:16428681-16431038 REVERSEispH lytB LYTB PRK00087 PRK12360 protein|4-hydroxy-3-methylbut-2-enyl diphosphate reductase, putative, expressed	-2.37593
16.1.1.10	secondary metabolism.isoprenoids.non-mevalonate pathway.geranylgeranyl pyrophosphate synthase	loc_os12g17320.1	Transcript	moderately similar to ( 474) AT1G17050 | Symbols: SPS2 | SPS2 (Solanesyl diphosphate synthase 2); trans-octaprenyltranstransferase | chr1:5829289-5831215 FORWARDweakly similar to ( 119) GGPPS_HEVBR Geranylgeranyl pyrophosphate synthetase, chloroplast precursor (GGPP synthetase) [Includes: Dimethylallyltranstransferase (EC 2.5.1.1); Geranyltranstransferase (EC 2.5.1.10); Farnesyltranstransferase (…	-3.91782
16.1.1.10	secondary metabolism.isoprenoids.non-mevalonate pathway.geranylgeranyl pyrophosphate synthase	loc_os01g14630.1	Transcript	moderately similar to ( 276) AT4G36810 | Symbols: GGPS1 | GGPS1 (GERANYLGERANYL PYROPHOSPHATE SYNTHASE 1); farnesyltranstransferase | chr4:17343513-17344628 FORWARDmoderately similar to ( 280) GGPPS_HEVBR Geranylgeranyl pyrophosphate synthetase, chloroplast precursor (GGPP synthetase) [Includes: Dimethylallyltranstransferase (EC 2.5.1.1); Geranyltranstransferase (EC 2.5.1.10); Farnesyltranstransf…	-1.42834
16.1.1.10	secondary metabolism.isoprenoids.non-mevalonate pathway.geranylgeranyl pyrophosphate synthase	loc_os05g50550.1	Transcript	moderately similar to ( 423) AT1G78510 | Symbols: SPS1 | SPS1 (solanesyl diphosphate synthase 1); trans-octaprenyltranstransferase | chr1:29535410-29537042 REVERSEweakly similar to ( 109) GGPPS_HEVBR Geranylgeranyl pyrophosphate synthetase, chloroplast precursor (GGPP synthetase) [Includes: Dimethylallyltranstransferase (EC 2.5.1.1); Geranyltranstransferase (EC 2.5.1.10); Farnesyltranstransferase…	-6.14131
16.1.2.1	secondary metabolism.isoprenoids.mevalonate pathway.acetyl-CoA C-acyltransferase	loc_os01g02020.1	Transcript	highly similar to ( 549) AT5G47720 | Symbols: | acetyl-CoA C-acyltransferase, putative / 3-ketoacyl-CoA thiolase, putative | chr5:19331866-19334009 FORWARD thiolase PRK08235 PRK06954 PRK07800 PRK05790 PRK07025 PRK05656 PRK07491 PRK06845 PRK07124 PRK06366 PRK08041 PRK09051 Thiolase_N PaaJ PRK06689 PRK06205 PRK06633 PRK09050 PRK09052 PRK06445 PRK07661 PRK08234 fadA PRK08242 PRK07851 PRK07108 PRK065…	2.83602
16.1.2.7	secondary metabolism.isoprenoids.mevalonate pathway.isopentenyl pyrophosphate:dimethyllallyl pyrophosphate isomerase	loc_os07g36190.1	Transcript	moderately similar to ( 416) AT3G02780 | Symbols: IPP2, IPIAT1, IDI2 | IPP2 (ISOPENTENYL PYROPHOSPHATE:DIMETHYLALLYL PYROPHOSPHATE ISOMERASE 2); isopentenyl-diphosphate delta-isomerase | chr3:602578-604648 REVERSE IPP_Isomerase Idi PRK03759 protein|hydrolase, NUDIX family, domain containing protein, expressed	-3.73061
16.1.2.7	secondary metabolism.isoprenoids.mevalonate pathway.isopentenyl pyrophosphate:dimethyllallyl pyrophosphate isomerase	loc_os05g34180.1	Transcript	moderately similar to ( 419) AT3G02780 | Symbols: IPP2, IPIAT1, IDI2 | IPP2 (ISOPENTENYL PYROPHOSPHATE:DIMETHYLALLYL PYROPHOSPHATE ISOMERASE 2); isopentenyl-diphosphate delta-isomerase | chr3:602578-604648 REVERSE IPP_Isomerase Idi PRK03759 protein|hydrolase, NUDIX family, domain containing protein, expressed	1.21711
16.1.2.9	secondary metabolism.isoprenoids.mevalonate pathway.farnesyl pyrophosphate synthetase	loc_os01g50760.1	Transcript	highly similar to ( 541) AT5G47770 | Symbols: FPS1 | FPS1 (FARNESYL DIPHOSPHATE SYNTHASE 1); dimethylallyltranstransferase/ geranyltranstransferase | chr5:19345297-19347415 FORWARDhighly similar to ( 622) FPPS_MAIZE Farnesyl pyrophosphate synthetase (FPP synthetase) (FPS) (Farnesyl diphosphate synthetase) [Includes: Dimethylallyltranstransferase (EC 2.5.1.1); Geranyltranstransferase (EC 2.5.1.10)…	-2.17652
16.1.2.9	secondary metabolism.isoprenoids.mevalonate pathway.farnesyl pyrophosphate synthetase	loc_os04g56230.1	Transcript	moderately similar to ( 444) AT5G47770 | Symbols: FPS1 | FPS1 (FARNESYL DIPHOSPHATE SYNTHASE 1); dimethylallyltranstransferase/ geranyltranstransferase | chr5:19345297-19347415 FORWARDmoderately similar to ( 441) FPPS_MAIZE Farnesyl pyrophosphate synthetase (FPP synthetase) (FPS) (Farnesyl diphosphate synthetase) [Includes: Dimethylallyltranstransferase (EC 2.5.1.1); Geranyltranstransferase (EC 2…	-7.25669
16.1.3	secondary metabolism.isoprenoids.tocopherol biosynthesis	loc_os11g35040.1	Transcript	moderately similar to ( 486) AT5G53970 | Symbols: | aminotransferase, putative | chr5:21910676-21912594 FORWARD COG0436 PRK09265 PRK08363 PRK05794 Aminotran_1_2 PRK06108 ARO8 PRK06056 PRK07212 PRK05764 PRK07568 PRK08443 PRK07367 PRK08069 PRK07337 PRK07309 PRK08362 MalY PRK06348 PRK06836 PRK07543 PRK06855 PRK08361 PRK07324 PRK07310 PRK05957 PRK07777 PRK08912 PRK08960 PRK09276 PRK07682 PRK06507 PRK…	-2.87495
16.1.3	secondary metabolism.isoprenoids.tocopherol biosynthesis	loc_os07g38850.1	Transcript	moderately similar to ( 385) AT3G11945 | Symbols: ATHST | homogentisate farnesyltransferase/ homogentisate geranylgeranyltransferase/ homogentisate solanesyltransferase | chr3:3780041-3782880 REVERSEubiA protein|prenyltransferase, putative, expressed	-2.7898
16.1.3.3	secondary metabolism.isoprenoids.tocopherol biosynthesis.MPBQ/MSBQ methyltransferase	loc_os12g42090.2	Transcript	moderately similar to ( 457) AT3G63410 | Symbols: APG1, VTE3, IEP37, E37 | APG1 (ALBINO OR PALE GREEN MUTANT 1); 2-methyl-6-phytyl-1,4-benzoquinone methyltransferase/ S-adenosylmethionine-dependent methyltransferase/ methyltransferase | chr3:23415816-23417002 REVERSEmoderately similar to ( 462) IN37_SPIOL 37 kDa inner envelope membrane protein, chloroplast precursor (E37) - Spinacia oleracea (Spi…	-1.96131
16.1.3.3	secondary metabolism.isoprenoids.tocopherol biosynthesis.MPBQ/MSBQ methyltransferase	loc_os07g08200.1	Transcript	moderately similar to ( 461) AT3G63410 | Symbols: APG1, VTE3, IEP37, E37 | APG1 (ALBINO OR PALE GREEN MUTANT 1); 2-methyl-6-phytyl-1,4-benzoquinone methyltransferase/ S-adenosylmethionine-dependent methyltransferase/ methyltransferase | chr3:23415816-23417002 REVERSEmoderately similar to ( 462) IN37_SPIOL 37 kDa inner envelope membrane protein, chloroplast precursor (E37) - Spinacia oleracea (Spi…	-3.1903
16.1.4	secondary metabolism.isoprenoids.carotenoids	loc_os03g62510.2	Transcript	highly similar to ( 502) AT1G57770 | Symbols: | amine oxidase family | chr1:21395254-21398135 FORWARDweakly similar to ( 173) CRTSO_DAUCA Carotenoid isomerase, chloroplast precursor (EC 5.-.-.-) (CrtISO) - Daucus carota (Carrot) COG1233 protein|amine oxidase, flavin-containing, domain containing protein, expressed	-3.52404
16.1.4	secondary metabolism.isoprenoids.carotenoids	loc_os12g43590.1	Transcript	highly similar to ( 792) AT5G49555 | Symbols: | amine oxidase-related | chr5:20107411-20110602 REVERSEvery weakly similar to (82.0) CRTSO_DAUCA Carotenoid isomerase, chloroplast precursor (EC 5.-.-.-) (CrtISO) - Daucus carota (Carrot) COG1233 protein|FAD dependent oxidoreductase domain containing protein, expressed	4.03514
16.1.4	secondary metabolism.isoprenoids.carotenoids	loc_os03g62510.1	Transcript	highly similar to ( 852) AT1G57770 | Symbols: | amine oxidase family | chr1:21395254-21398135 FORWARDweakly similar to ( 194) CRTSO_DAUCA Carotenoid isomerase, chloroplast precursor (EC 5.-.-.-) (CrtISO) - Daucus carota (Carrot) COG1233 protein|amine oxidase, flavin-containing, domain containing protein, expressed	-3.00048
16.1.4.1	secondary metabolism.isoprenoids.carotenoids.phytoene synthase	loc_os12g43130.1	Transcript	highly similar to ( 508) AT5G17230 | Symbols: | phytoene synthase (PSY) / geranylgeranyl-diphosphate geranylgeranyl transferase | chr5:5659839-5662087 REVERSEhighly similar to ( 520) PSY_DAUCA Phytoene synthase, chloroplast precursor (EC 2.5.1.-) - Daucus carota (Carrot) SQS_PSY Trans_IPPS_HH ERG9 Isoprenoid_Biosyn_C1 Trans_IPPS protein|phytoene synthase, chloroplast precursor, putative, expressed	-5.19476
16.1.4.1	secondary metabolism.isoprenoids.carotenoids.phytoene synthase	loc_os09g38320.1	Transcript	moderately similar to ( 474) AT5G17230 | Symbols: | phytoene synthase (PSY) / geranylgeranyl-diphosphate geranylgeranyl transferase | chr5:5659839-5662087 REVERSEmoderately similar to ( 483) PSY_MAIZE Phytoene synthase, chloroplast precursor (EC 2.5.1.-) - Zea mays (Maize) SQS_PSY Trans_IPPS_HH ERG9 Isoprenoid_Biosyn_C1 Trans_IPPS protein|phytoene synthase, chloroplast precursor, putative, expres…	-2.34577
16.1.4.3	secondary metabolism.isoprenoids.carotenoids.zeta-carotene desaturase	loc_os07g10490.1	Transcript	highly similar to ( 924) AT3G04870 | Symbols: ZDS, PDE181 | ZDS (ZETA-CAROTENE DESATURASE); carotene 7,8-desaturase | chr3:1342842-1346189 FORWARDnearly identical (1043) ZDS_MAIZE Zeta-carotene desaturase, chloroplast precursor (EC 1.14.99.30) (Carotene 7,8-desaturase) - Zea mays (Maize) COG3349 Amino_oxidase PRK07233 protein|zeta-carotene desaturase, chloroplast/chromoplast precursor, putative, …	-1.38523
16.1.4.6	secondary metabolism.isoprenoids.carotenoids.carotenoid beta ring hydroxylase	loc_os04g48880.1	Transcript	moderately similar to ( 327) AT4G25700 | Symbols: BETA-OHASE 1, B1, chy1 | BETA-OHASE 1 (BETA-HYDROXYLASE 1); carotene beta-ring hydroxylase | chr4:13094965-13095866 REVERSE protein|fatty acid hydroxylase, putative, expressed	-6.04244
16.1.4.6	secondary metabolism.isoprenoids.carotenoids.carotenoid beta ring hydroxylase	loc_os10g38940.1	Transcript	moderately similar to ( 283) AT4G25700 | Symbols: BETA-OHASE 1, B1, chy1 | BETA-OHASE 1 (BETA-HYDROXYLASE 1); carotene beta-ring hydroxylase | chr4:13094965-13095866 REVERSE protein|fatty acid hydroxylase, putative, expressed	-4.73293
16.1.4.21	secondary metabolism.isoprenoids.carotenoids.violaxanthin de-epoxidase	loc_os01g51860.1	Transcript	highly similar to ( 614) AT2G21860 | Symbols: | violaxanthin de-epoxidase-related | chr2:9318333-9319990 REVERSE protein|violaxanthin de-epoxidase, putative, expressed	-2.68374
16.1.5	secondary metabolism.isoprenoids.terpenoids	loc_os08g04500.2	Transcript	moderately similar to ( 256) AT5G23960 | Symbols: ATTPS21, TPS21 | TPS21 (TERPENE SYNTHASE 21); (-)-E-beta-caryophyllene synthase/ alpha-humulene synthase | chr5:8092969-8095128 FORWARDmoderately similar to ( 344) DCS1_GOSHI (+)-delta-cadinene synthase (EC 4.2.3.13) (D-cadinene synthase) - Gossypium hirsutum (Upland cotton)Terpene_cyclase_plant_C1 Terpene_cyclase_C1 Terpene_synth_C Terpene_synth …	-9.30039
16.1.5	secondary metabolism.isoprenoids.terpenoids	loc_os08g04500.1	Transcript	moderately similar to ( 264) AT5G23960 | Symbols: ATTPS21, TPS21 | TPS21 (TERPENE SYNTHASE 21); (-)-E-beta-caryophyllene synthase/ alpha-humulene synthase | chr5:8092969-8095128 FORWARDmoderately similar to ( 364) DCS1_GOSHI (+)-delta-cadinene synthase (EC 4.2.3.13) (D-cadinene synthase) - Gossypium hirsutum (Upland cotton)Terpene_cyclase_plant_C1 Terpene_cyclase_C1 Terpene_synth_C Terpene_synth …	-10.9327
16.1.5	secondary metabolism.isoprenoids.terpenoids	loc_os02g02930.1	Transcript	moderately similar to ( 333) AT1G61680 | Symbols: TPS14, ATTPS14 | TPS14 (TERPENE SYNTHASE 14); S-linalool synthase | chr1:22772455-22774687 REVERSEmoderately similar to ( 212) DCS1_GOSHI (+)-delta-cadinene synthase (EC 4.2.3.13) (D-cadinene synthase) - Gossypium hirsutum (Upland cotton)Terpene_cyclase_plant_C1 Terpene_synth_C Terpene_cyclase_C1 Terpene_synth protein|terpene synthase, putative, e…	-2.32241
16.1.5	secondary metabolism.isoprenoids.terpenoids	loc_os11g35710.1	Transcript	highly similar to ( 920) AT2G07050 | Symbols: CAS1 | CAS1 (cycloartenol synthase 1); cycloartenol synthase | chr2:2924629-2930295 FORWARD SQCY_1 SQCY SqhC ISOPREN_C2_like protein|cycloartenol synthase, putative, expressed	2.66695
16.1.5	secondary metabolism.isoprenoids.terpenoids	loc_os06g07120.1	Transcript	moderately similar to ( 280) AT2G17570 | Symbols: | undecaprenyl pyrophosphate synthetase family protein / UPP synthetase family protein | chr2:7645086-7645973 FORWARD CIS_IPPS UppS Prenyltransf PRK10240 protein|dehydrodolichyl diphosphate synthase, putative, expressed	-1.45538
16.2	secondary metabolism.phenylpropanoids	loc_os01g42870.1	Transcript	moderately similar to ( 213) AT3G62160 | Symbols: | transferase family protein | chr3:23014333-23015808 REVERSEvery weakly similar to (96.7) HCBT2_DIACA Anthranilate N-benzoyltransferase protein 2 (EC 2.3.1.144) (Anthranilate N-hydroxycinnamoyl/benzoyltransferase 2) - Dianthus caryophyllus (Carnation) (Clove pink)Transferase protein|transferase family protein, putative, expressed	2.83077
16.2	secondary metabolism.phenylpropanoids	loc_os06g48560.1	Transcript	weakly similar to ( 113) AT3G62160 | Symbols: | transferase family protein | chr3:23014333-23015808 REVERSETransferase protein|transferase family protein, putative, expressed	-3.13798
16.2	secondary metabolism.phenylpropanoids	loc_os10g42800.1	Transcript	moderately similar to ( 479) AT4G19010 | Symbols: | 4-coumarate--CoA ligase family protein / 4-coumaroyl-CoA synthase family protein | chr4:10411715-10414221 REVERSEmoderately similar to ( 271) 4CL1_TOBAC 4-coumarate--CoA ligase 1 (EC 6.2.1.12) (4CL 1) (4-coumaroyl-CoA synthase 1) - Nicotiana tabacum (Common tobacco) CaiC AMP-binding PRK08314 Acs PRK09089 PRK07656 PRK06187 PRK06839 PRK05605 PRK07…	-7.58919
16.2	secondary metabolism.phenylpropanoids	loc_os09g25460.1	Transcript	moderately similar to ( 236) AT5G48930 | Symbols: HCT | HCT (HYDROXYCINNAMOYL-COA SHIKIMATE/QUINATE HYDROXYCINNAMOYL TRANSFERASE); quinate O-hydroxycinnamoyltransferase/ shikimate O-hydroxycinnamoyltransferase/ transferase | chr5:19836654-19838092 REVERSEweakly similar to ( 182) HCBT1_DIACA Anthranilate N-benzoyltransferase protein 1 (EC 2.3.1.144) (Anthranilate N-hydroxycinnamoyl/benzoyltransfer…	3.4451
16.2	secondary metabolism.phenylpropanoids	loc_os09g31506.1	Transcript	moderately similar to ( 246) AT2G33590 | Symbols: | cinnamoyl-CoA reductase family | chr2:14224622-14226365 FORWARDweakly similar to ( 136) DFRA_HORVU Dihydroflavonol-4-reductase (EC 1.1.1.219) (DFR) (Dihydrokaempferol 4-reductase) - Hordeum vulgare (Barley) WcaG Epimerase 3Beta_HSD protein|dihydroflavonol-4-reductase, putative, expressed	-1.30943
16.2	secondary metabolism.phenylpropanoids	loc_os06g05750.1	Transcript	weakly similar to ( 173) AT1G31490 | Symbols: | transferase family protein | chr1:11271744-11273078 REVERSETransferase protein|transferase family domain containing protein, expressed	3.18934
16.2	secondary metabolism.phenylpropanoids	loc_os05g37660.1	Transcript	moderately similar to ( 432) AT5G01210 | Symbols: | transferase family protein | chr5:84554-85981 FORWARDvery weakly similar to (82.0) HCBT3_DIACA Anthranilate N-benzoyltransferase protein 3 (EC 2.3.1.144) (Anthranilate N-hydroxycinnamoyl/benzoyltransferase 3) - Dianthus caryophyllus (Carnation) (Clove pink)Transferase protein|transferase family protein, putative, expressed	-5.66191
16.2	secondary metabolism.phenylpropanoids	loc_os04g56910.1	Transcript	weakly similar to ( 199) AT5G48930 | Symbols: HCT | HCT (HYDROXYCINNAMOYL-COA SHIKIMATE/QUINATE HYDROXYCINNAMOYL TRANSFERASE); quinate O-hydroxycinnamoyltransferase/ shikimate O-hydroxycinnamoyltransferase/ transferase | chr5:19836654-19838092 REVERSEweakly similar to ( 195) HCBT1_DIACA Anthranilate N-benzoyltransferase protein 1 (EC 2.3.1.144) (Anthranilate N-hydroxycinnamoyl/benzoyltransferase …	5.86577
16.2	secondary metabolism.phenylpropanoids	loc_os06g05790.1	Transcript	weakly similar to ( 148) AT1G31490 | Symbols: | transferase family protein | chr1:11271744-11273078 REVERSETransferase protein|transferase family domain containing protein, expressed	2.70213
16.2	secondary metabolism.phenylpropanoids	loc_os06g06180.1	Transcript	moderately similar to ( 341) AT1G28680 | Symbols: | transferase family protein | chr1:10078222-10079763 FORWARDweakly similar to ( 142) HCBT1_DIACA Anthranilate N-benzoyltransferase protein 1 (EC 2.3.1.144) (Anthranilate N-hydroxycinnamoyl/benzoyltransferase 1) - Dianthus caryophyllus (Carnation) (Clove pink)Transferase protein|transferase family protein, putative, expressed	-5.15023
16.2	secondary metabolism.phenylpropanoids	loc_os03g05780.1	Transcript	highly similar to ( 574) AT4G05160 | Symbols: | 4-coumarate--CoA ligase, putative / 4-coumaroyl-CoA synthase, putative | chr4:2664451-2666547 FORWARDmoderately similar to ( 372) 4CL1_TOBAC 4-coumarate--CoA ligase 1 (EC 6.2.1.12) (4CL 1) (4-coumaroyl-CoA synthase 1) - Nicotiana tabacum (Common tobacco) CaiC PRK08314 AMP-binding Acs PRK07656 PRK03640 PRK08316 PRK06187 PRK08315 PRK07770 PRK07786 PRK…	1.7344
16.2	secondary metabolism.phenylpropanoids	loc_os08g14570.1	Transcript	highly similar to ( 920) AT4G30210 | Symbols: ATR2, AR2 | ATR2 (ARABIDOPSIS P450 REDUCTASE 2); NADPH-hemoprotein reductase | chr4:14796900-14800578 FORWARDhighly similar to ( 948) NCPR_CATRO NADPH--cytochrome P450 reductase (EC 1.6.2.4) (CPR) (P450R) - Catharanthus roseus (Rosy periwinkle) (Madagascar periwinkle) CysJ FAD_binding_1 cysJ PRK06214 Flavodoxin_1 protein|NADPH reductase, putative, exp…	-5.51389
16.2	secondary metabolism.phenylpropanoids	loc_os11g42480.1	Transcript	weakly similar to ( 183) AT1G31490 | Symbols: | transferase family protein | chr1:11271744-11273078 REVERSETransferase protein|transferase family domain containing protein, expressed	-4.20993
16.2	secondary metabolism.phenylpropanoids	loc_os10g34350.1	Transcript	moderately similar to ( 252) AT1G77670 | Symbols: | aminotransferase class I and II family protein | chr1:29189043-29190901 REVERSE PRK08912 COG0436 PRK07777 PRK09082 PRK07212 PRK07683 PRK07309 PRK08362 PRK05794 PRK12414 PRK07682 PRK08069 PRK07367 PRK06056 PRK09276 PRK05764 PRK06220 PRK07337 PRK07543 PRK08443 PRK06107 PRK06507 PRK05957 PRK08361 PRK08363 PRK06108 PRK07310 PRK08960 PRK07568 PRK0657…	3.9144
16.2	secondary metabolism.phenylpropanoids	loc_os07g28040.1	Transcript	weakly similar to ( 164) AT4G35160 | Symbols: | O-methyltransferase family 2 protein | chr4:16730989-16732808 REVERSEmoderately similar to ( 251) ZRP4_MAIZE O-methyltransferase ZRP4 (EC 2.1.1.-) (OMT) - Zea mays (Maize) Methyltransf_2 protein|O-methyltransferase, putative, expressed	-11.0576
16.2	secondary metabolism.phenylpropanoids	loc_os06g01350.1	Transcript	moderately similar to ( 306) AT5G42830 | Symbols: | transferase family protein | chr5:17176384-17177906 FORWARDTransferase protein|transferase family protein, putative, expressed	3.14112
16.2	secondary metabolism.phenylpropanoids	loc_os02g39400.1	Transcript	moderately similar to ( 298) AT2G22570 | Symbols: ATNIC1, NIC1 | NIC1 (NICOTINAMIDASE 1); catalytic/ nicotinamidase | chr2:9590021-9590846 REVERSEcysteine_hydrolases protein|isochorismatase family protein, putative, expressed	3.16197
16.2	secondary metabolism.phenylpropanoids	loc_os07g27970.1	Transcript	weakly similar to ( 176) AT4G35160 | Symbols: | O-methyltransferase family 2 protein | chr4:16730989-16732808 REVERSEmoderately similar to ( 270) ZRP4_MAIZE O-methyltransferase ZRP4 (EC 2.1.1.-) (OMT) - Zea mays (Maize) Methyltransf_2 protein|O-methyltransferase, putative, expressed	-6.109
16.2	secondary metabolism.phenylpropanoids	loc_os11g07960.1	Transcript	weakly similar to ( 179) AT5G48930 | Symbols: HCT | HCT (HYDROXYCINNAMOYL-COA SHIKIMATE/QUINATE HYDROXYCINNAMOYL TRANSFERASE); quinate O-hydroxycinnamoyltransferase/ shikimate O-hydroxycinnamoyltransferase/ transferase | chr5:19836654-19838092 REVERSEweakly similar to ( 169) HCBT2_DIACA Anthranilate N-benzoyltransferase protein 2 (EC 2.3.1.144) (Anthranilate N-hydroxycinnamoyl/benzoyltransferase …	2.61323
16.2	secondary metabolism.phenylpropanoids	loc_os01g67530.1	Transcript	moderately similar to ( 331) AT5G63380 | Symbols: | 4-coumarate--CoA ligase family protein / 4-coumaroyl-CoA synthase family protein | chr5:25387581-25390026 REVERSEweakly similar to ( 171) 4CL2_TOBAC 4-coumarate--CoA ligase 2 (EC 6.2.1.12) (4CL 2) (4-coumaroyl-CoA synthase 2) - Nicotiana tabacum (Common tobacco) CaiC AMP-binding PRK08315 PRK08314 PRK12583 FAA1 PRK06187 PRK06087 PRK08276 PRK05677…	-2.18545
16.2.1.1	secondary metabolism.phenylpropanoids.lignin biosynthesis.PAL	loc_os04g43800.1	Transcript	nearly identical (1058) AT3G53260 | Symbols: PAL2, ATPAL2 | PAL2; phenylalanine ammonia-lyase | chr3:19744256-19746619 REVERSEnearly identical (1240) PALY_WHEAT Phenylalanine ammonia-lyase (EC 4.3.1.5) - Triticum aestivum (Wheat) PAL PAL-HAL HutH PRK09367 protein|phenylalanine ammonia-lyase, putative, expressed	-5.97521
16.2.1.1	secondary metabolism.phenylpropanoids.lignin biosynthesis.PAL	loc_os11g48110.1	Transcript	highly similar to ( 870) AT2G37040 | Symbols: pal1, ATPAL1 | pal1 (Phe ammonia lyase 1); phenylalanine ammonia-lyase | chr2:15557602-15560237 REVERSEhighly similar to ( 955) PAL2_ORYSA Phenylalanine ammonia-lyase (EC 4.3.1.5) - Oryza sativa (Rice) PAL PAL-HAL HutH PRK09367 protein|phenylalanine ammonia-lyase, putative, expressed	-1.65479
16.2.1.1	secondary metabolism.phenylpropanoids.lignin biosynthesis.PAL	loc_os04g43760.1	Transcript	nearly identical (1001) AT2G37040 | Symbols: pal1, ATPAL1 | pal1 (Phe ammonia lyase 1); phenylalanine ammonia-lyase | chr2:15557602-15560237 REVERSEnearly identical (1204) PAL1_ORYSA Phenylalanine ammonia-lyase (EC 4.3.1.5) - Oryza sativa (Rice) PAL PAL-HAL HutH PRK09367 protein|phenylalanine ammonia-lyase, putative, expressed	-1.89125
16.2.1.1	secondary metabolism.phenylpropanoids.lignin biosynthesis.PAL	loc_os12g33610.1	Transcript	highly similar to ( 861) AT2G37040 | Symbols: pal1, ATPAL1 | pal1 (Phe ammonia lyase 1); phenylalanine ammonia-lyase | chr2:15557602-15560237 REVERSEhighly similar to ( 944) PAL2_ORYSA Phenylalanine ammonia-lyase (EC 4.3.1.5) - Oryza sativa (Rice) PAL PAL-HAL HutH PRK09367 protein|phenylalanine ammonia-lyase, putative, expressed	-1.92506
16.2.1.3	secondary metabolism.phenylpropanoids.lignin biosynthesis.4CL	loc_os02g46970.1	Transcript	highly similar to ( 675) AT1G65060 | Symbols: 4CL3 | 4CL3; 4-coumarate-CoA ligase | chr1:24167927-24171457 REVERSEhighly similar to ( 955) 4CL2_ORYSA 4-coumarate--CoA ligase 2 (EC 6.2.1.12) (4CL 2) (4-coumaroyl-CoA synthase 2) - Oryza sativa (Rice) CaiC AMP-binding PRK08314 PRK08315 PRK08316 PRK07656 PRK07770 PRK05605 PRK06187 Acs PRK06178 PRK07684 PRK03640 PRK06710 PRK07059 PRK12583 PRK08974 PRK…	-8.43927
16.2.1.3	secondary metabolism.phenylpropanoids.lignin biosynthesis.4CL	loc_os06g44620.1	Transcript	highly similar to ( 643) AT3G21240 | Symbols: 4CL2, AT4CL2 | 4CL2 (4-COUMARATE:COA LIGASE 2); 4-coumarate-CoA ligase | chr3:7454497-7457314 REVERSEhighly similar to ( 671) 4CL1_TOBAC 4-coumarate--CoA ligase 1 (EC 6.2.1.12) (4CL 1) (4-coumaroyl-CoA synthase 1) - Nicotiana tabacum (Common tobacco) CaiC AMP-binding PRK08314 PRK06187 PRK05605 PRK07656 PRK08316 PRK08315 PRK07684 Acs PRK06178 PRK06710 …	2.67838
16.2.1.3	secondary metabolism.phenylpropanoids.lignin biosynthesis.4CL	loc_os08g34790.1	Transcript	highly similar to ( 628) AT3G21240 | Symbols: 4CL2, AT4CL2 | 4CL2 (4-COUMARATE:COA LIGASE 2); 4-coumarate-CoA ligase | chr3:7454497-7457314 REVERSEhighly similar to ( 655) 4CL2_TOBAC 4-coumarate--CoA ligase 2 (EC 6.2.1.12) (4CL 2) (4-coumaroyl-CoA synthase 2) - Nicotiana tabacum (Common tobacco) CaiC AMP-binding PRK06187 PRK08316 PRK07656 Acs PRK03640 PRK07770 PRK08314 PRK08315 PRK05605 PRK07059 …	-4.27846
16.2.1.3	secondary metabolism.phenylpropanoids.lignin biosynthesis.4CL	loc_os06g44620.2	Transcript	moderately similar to ( 434) AT1G51680 | Symbols: 4CL1, 4CL.1, AT4CL1 | 4CL1 (4-COUMARATE:COA LIGASE 1); 4-coumarate-CoA ligase | chr1:19159080-19161464 REVERSEmoderately similar to ( 451) 4CL2_TOBAC 4-coumarate--CoA ligase 2 (EC 6.2.1.12) (4CL 2) (4-coumaroyl-CoA synthase 2) - Nicotiana tabacum (Common tobacco) CaiC AMP-binding PRK08314 PRK07656 PRK05605 PRK07684 PRK06187 PRK06710 PRK08316 PRK08…	3.28492
16.2.1.4	secondary metabolism.phenylpropanoids.lignin biosynthesis.HCT	loc_os09g37200.1	Transcript	weakly similar to ( 142) AT5G48930 | Symbols: HCT | HCT (HYDROXYCINNAMOYL-COA SHIKIMATE/QUINATE HYDROXYCINNAMOYL TRANSFERASE); quinate O-hydroxycinnamoyltransferase/ shikimate O-hydroxycinnamoyltransferase/ transferase | chr5:19836654-19838092 REVERSEweakly similar to ( 144) HCBT1_DIACA Anthranilate N-benzoyltransferase protein 1 (EC 2.3.1.144) (Anthranilate N-hydroxycinnamoyl/benzoyltransferase …	4.39184
16.2.1.10	secondary metabolism.phenylpropanoids.lignin biosynthesis.CAD	loc_os09g23540.1	Transcript	moderately similar to ( 352) AT4G37980 | Symbols: ELI3-1, ELI3, ATCAD7, CAD7 | ELI3-1 (ELICITOR-ACTIVATED GENE 3-1); binding / catalytic/ oxidoreductase/ zinc ion binding | chr4:17852670-17853914 FORWARDmoderately similar to ( 384) MTDH_FRAAN Probable mannitol dehydrogenase (EC 1.1.1.255) (NAD-dependent mannitol dehydrogenase) - Fragaria ananassa (Strawberry) AdhP PRK09422 AdhC Tdh ADH_N Qor tdh …	6.50082
16.2.1.10	secondary metabolism.phenylpropanoids.lignin biosynthesis.CAD	loc_os09g23560.1	Transcript	moderately similar to ( 320) AT4G37980 | Symbols: ELI3-1, ELI3, ATCAD7, CAD7 | ELI3-1 (ELICITOR-ACTIVATED GENE 3-1); binding / catalytic/ oxidoreductase/ zinc ion binding | chr4:17852670-17853914 FORWARDmoderately similar to ( 324) MTDH_FRAAN Probable mannitol dehydrogenase (EC 1.1.1.255) (NAD-dependent mannitol dehydrogenase) - Fragaria ananassa (Strawberry) AdhP PRK09422 Tdh AdhC Qor ADH_N tdh …	4.54384
16.2.1.10	secondary metabolism.phenylpropanoids.lignin biosynthesis.CAD	loc_os10g29470.1	Transcript	moderately similar to ( 421) AT4G39330 | Symbols: ATCAD9, CAD9 | CAD9 (CINNAMYL ALCOHOL DEHYDROGENASE 9); binding / catalytic/ oxidoreductase/ zinc ion binding | chr4:18291268-18292740 FORWARDmoderately similar to ( 423) MTDH_FRAAN Probable mannitol dehydrogenase (EC 1.1.1.255) (NAD-dependent mannitol dehydrogenase) - Fragaria ananassa (Strawberry) AdhP PRK09422 AdhC Tdh Qor ADH_N tdh ADH_zinc_N …	-6.10654
16.4.1	secondary metabolism.N misc.alkaloid-like	loc_os10g39710.1	Transcript	moderately similar to ( 347) AT3G51420 | Symbols: SSL4, ATSSL4 | SSL4 (STRICTOSIDINE SYNTHASE-LIKE 4); strictosidine synthase | chr3:19084082-19085451 FORWARD Str_synth COG3386 protein|strictosidine synthase, putative, expressed	2.26801
16.4.1	secondary metabolism.N misc.alkaloid-like	loc_os07g42250.1	Transcript	weakly similar to ( 177) AT3G51420 | Symbols: SSL4, ATSSL4 | SSL4 (STRICTOSIDINE SYNTHASE-LIKE 4); strictosidine synthase | chr3:19084082-19085451 FORWARDvery weakly similar to (89.4) STSY_CATRO Strictosidine synthase precursor (EC 4.3.3.2) - Catharanthus roseus (Rosy periwinkle) (Madagascar periwinkle) COG3386 Str_synth protein|strictosidine synthase, putative, expressed	-3.0491
16.4.3	secondary metabolism.N misc.cyanogenic glycosides	loc_os10g33270.1	Transcript	moderately similar to ( 228) AT3G23490 | Symbols: CYN | CYN (CYANASE); DNA binding / cyanate hydratase/ hydro-lyase | chr3:8423238-8424415 REVERSEmoderately similar to ( 301) CYNS_ORYSA Cyanate hydratase (EC 4.2.1.104) (Cyanase) (Cyanate lyase) (Cyanate hydrolase) - Oryza sativa (Rice)PRK02866 Cyanate_lyase CynS Cyanase_C protein|cyanate hydratase, putative, expressed	1.79047
16.5.1.3.2	secondary metabolism.sulfur-containing.glucosinolates.degradation.nitrilespecifier protein	loc_os07g33100.1	Transcript	highly similar to ( 959) AT4G04670 | Symbols: | Met-10+ like family protein / kelch repeat-containing protein | chr4:2367603-2371990 FORWARD COG2520 COG1590 Met_10 TYW3 PRK04235 protein|uncharacterized ACR, COG1590 family protein, expressed	2.97352
16.5.99.1	secondary metabolism.sulfur-containing.misc.alliinase	loc_os01g52010.1	Transcript	moderately similar to ( 437) AT1G34060 | Symbols: | alliinase family protein | chr1:12396561-12398299 REVERSEAlliinase_C EGF_alliinase protein|alliin lyase precursor, putative, expressed	1.90892
16.7	secondary metabolism.wax	loc_os02g38440.1	Transcript	moderately similar to ( 334) AT1G67730 | Symbols: YBR159, KCR1 | YBR159; ketoreductase/ oxidoreductase | chr1:25391676-25393365 FORWARD DltE COG4221 fabG PRK07201 fabG fabG PRK12826 fabG FabG PRK07454 PRK09072 PRK08226 PRK06914 PRK12824 PRK06181 PRK05872 PRK07825 PRK06114 PRK08251 benD PRK07523 PRK10538 PRK12939 PRK07063 PRK05650 DltE PRK06179 PRK06138 PRK08220 PRK06182 PRK05866 PRK08324 PRK09242…	1.37449
16.7	secondary metabolism.wax	loc_os09g25850.1	Transcript	highly similar to ( 729) AT5G57800 | Symbols: FLP1, YRE, CER3, WAX2 | CER3 (ECERIFERUM 3); binding / catalytic/ iron ion binding / oxidoreductase | chr5:23420589-23423832 FORWARD protein|WAX2, putative, expressed	-3.85103
16.8.1.21	secondary metabolism.flavonoids.anthocyanins.anthocyanin 5-aromatic acyltransferase	loc_os04g51660.1	Transcript	weakly similar to ( 164) AT3G29670 | Symbols: | transferase family protein | chr3:11527952-11529307 FORWARDTransferase protein|transferase family protein, putative, expressed	-2.02877
16.8.1.21	secondary metabolism.flavonoids.anthocyanins.anthocyanin 5-aromatic acyltransferase	loc_os07g23150.1	Transcript	weakly similar to ( 160) AT1G03940 | Symbols: | transferase family protein | chr1:1009542-1010951 REVERSETransferase protein|transferase family protein, putative, expressed	-6.87084
16.8.1.21	secondary metabolism.flavonoids.anthocyanins.anthocyanin 5-aromatic acyltransferase	loc_os02g28220.1	Transcript	weakly similar to ( 103) AT3G29670 | Symbols: | transferase family protein | chr3:11527952-11529307 FORWARDTransferase protein|transferase family protein, putative, expressed	-9.32443
16.8.1.21	secondary metabolism.flavonoids.anthocyanins.anthocyanin 5-aromatic acyltransferase	loc_os04g54560.1	Transcript	weakly similar to ( 152) AT5G61160 | Symbols: AACT1 | AACT1 (anthocyanin 5-aromatic acyltransferase 1); transferase/ transferase, transferring acyl groups other than amino-acyl groups | chr5:24608781-24610139 FORWARDvery weakly similar to (92.8) HCBT1_DIACA Anthranilate N-benzoyltransferase protein 1 (EC 2.3.1.144) (Anthranilate N-hydroxycinnamoyl/benzoyltransferase 1) - Dianthus caryophyllus (Ca…	-2.92648
16.8.2	secondary metabolism.flavonoids.chalcones	loc_os06g10210.2	Transcript	moderately similar to ( 282) AT2G26310 | Symbols: | chalcone isomerase | chr2:11201770-11203919 FORWARD protein|expressed protein	-8.76511
16.8.2	secondary metabolism.flavonoids.chalcones	loc_os12g02370.4	Transcript	weakly similar to ( 184) AT5G05270 | Symbols: | chalcone-flavanone isomerase family protein | chr5:1563543-1564827 FORWARDvery weakly similar to (80.9) CFI_PHAVU Chalcone--flavonone isomerase (EC 5.5.1.6) (Chalcone isomerase) - Phaseolus vulgaris (Kidney bean) (French bean)Chalcone protein|chalcone--flavonone isomerase, putative, expressed	-8.60492
16.8.2	secondary metabolism.flavonoids.chalcones	loc_os03g13390.2	Transcript	moderately similar to ( 369) AT1G59960 | Symbols: | aldo/keto reductase, putative | chr1:22071410-22073067 REVERSEmoderately similar to ( 417) NADO1_ORYSA Probable NAD(P)H-dependent oxidoreductase 1 (EC 1.1.1.-) - Oryza sativa (Rice) Aldo_ket_red ARA1 dkgA dkgB Tas protein|oxidoreductase, aldo/keto reductase family protein, putative, expressed	3.37359
16.8.2	secondary metabolism.flavonoids.chalcones	loc_os11g32650.1	Transcript	highly similar to ( 675) AT5G13930 | Symbols: CHS, TT4, ATCHS | TT4 (TRANSPARENT TESTA 4); naringenin-chalcone synthase | chr5:4488762-4490035 FORWARDhighly similar to ( 786) CHSY_ORYSA Chalcone synthase (EC 2.3.1.74) (Naregenin-chalcone synthase) - Oryza sativa (Rice)Chal_sti_synt_N CHS_like Chal_sti_synt_C BcsA cond_enzymes decarbox_cond_enzymes init_cond_enzymes protein|chalcone synthase, puta…	-7.99589
16.8.2	secondary metabolism.flavonoids.chalcones	loc_os11g02440.1	Transcript	moderately similar to ( 235) AT5G05270 | Symbols: | chalcone-flavanone isomerase family protein | chr5:1563543-1564827 FORWARDvery weakly similar to (88.2) CFI_PHAVU Chalcone--flavonone isomerase (EC 5.5.1.6) (Chalcone isomerase) - Phaseolus vulgaris (Kidney bean) (French bean)Chalcone protein|chalcone--flavonone isomerase, putative, expressed	-4.57875
16.8.3	secondary metabolism.flavonoids.dihydroflavonols	loc_os06g44180.1	Transcript	weakly similar to ( 165) AT4G27250 | Symbols: | dihydroflavonol 4-reductase family / dihydrokaempferol 4-reductase family | chr4:13642803-13644425 REVERSEweakly similar to ( 142) DFRA_HORVU Dihydroflavonol-4-reductase (EC 1.1.1.219) (DFR) (Dihydrokaempferol 4-reductase) - Hordeum vulgare (Barley) WcaG protein|NAD dependent epimerase/dehydratase family protein, putative, expressed	2.20115
16.8.3	secondary metabolism.flavonoids.dihydroflavonols	loc_os04g53860.1	Transcript	weakly similar to ( 193) AT1G61720 | Symbols: BAN | BAN (BANYULS); oxidoreductase | chr1:22791326-22792757 REVERSEweakly similar to ( 141) DFRA_PETHY Dihydroflavonol-4-reductase (EC 1.1.1.219) (DFR) (Dihydrokaempferol 4-reductase) - Petunia hybrida (Petunia) protein|reductase, putative, expressed	1.95888
16.8.3	secondary metabolism.flavonoids.dihydroflavonols	loc_os04g53850.1	Transcript	moderately similar to ( 311) AT1G61720 | Symbols: BAN | BAN (BANYULS); oxidoreductase | chr1:22791326-22792757 REVERSEmoderately similar to ( 234) DFRA_VITVI Dihydroflavonol-4-reductase (EC 1.1.1.219) (DFR) (Dihydrokaempferol 4-reductase) - Vitis vinifera (Grape) WcaG protein|leucoanthocyanidin reductase, putative, expressed	4.40737
16.8.3	secondary metabolism.flavonoids.dihydroflavonols	loc_os04g53810.1	Transcript	moderately similar to ( 283) AT1G61720 | Symbols: BAN | BAN (BANYULS); oxidoreductase | chr1:22791326-22792757 REVERSEmoderately similar to ( 218) DFRA_VITVI Dihydroflavonol-4-reductase (EC 1.1.1.219) (DFR) (Dihydrokaempferol 4-reductase) - Vitis vinifera (Grape) WcaG Epimerase protein|leucoanthocyanidin reductase, putative, expressed	-2.0839
16.8.3	secondary metabolism.flavonoids.dihydroflavonols	loc_os04g53830.1	Transcript	moderately similar to ( 268) AT1G61720 | Symbols: BAN | BAN (BANYULS); oxidoreductase | chr1:22791326-22792757 REVERSEweakly similar to ( 199) DFRA_HORVU Dihydroflavonol-4-reductase (EC 1.1.1.219) (DFR) (Dihydrokaempferol 4-reductase) - Hordeum vulgare (Barley) WcaG protein|3-beta hydroxysteroid dehydrogenase/isomerase family protein, putative, expressed	4.99952
16.8.3	secondary metabolism.flavonoids.dihydroflavonols	loc_os03g08624.1	Transcript	moderately similar to ( 426) AT4G33360 | Symbols: | terpene cyclase/mutase-related | chr4:16068123-16069374 REVERSE WcaG Epimerase GalE NAD_binding_4 RfbB protein|dihydroflavonol-4-reductase, putative, expressed	6.32636
16.8.4	secondary metabolism.flavonoids.flavonols	loc_os10g41020.1	Transcript	moderately similar to ( 313) AT4G25300 | Symbols: | oxidoreductase, 2OG-Fe(II) oxygenase family protein | chr4:12945780-12946642 FORWARDweakly similar to ( 195) FLS_PETHY Flavonol synthase/flavanone 3-hydroxylase (EC 1.14.11.23) (EC 1.14.11.9) (FLS) - Petunia hybrida (Petunia) PcbC 2OG-FeII_Oxy protein|flavonol synthase/flavanone 3-hydroxylase, putative, expressed	3.78088
16.8.4	secondary metabolism.flavonoids.flavonols	loc_os10g40934.7	Transcript	moderately similar to ( 253) AT1G17020 | Symbols: SRG1, ATSRG1 | SRG1 (SENESCENCE-RELATED GENE 1); oxidoreductase, acting on diphenols and related substances as donors, oxygen as acceptor / oxidoreductase, acting on paired donors, with incorporation or reduction of molecular oxygen, 2-oxoglutarate as one donor, and inc | chr1:5820258-5821741 FORWARDweakly similar to ( 149) FLS_PETHY Flavonol synt…	6.02189
16.8.4	secondary metabolism.flavonoids.flavonols	loc_os01g25010.1	Transcript	moderately similar to ( 291) AT1G17010 | Symbols: | oxidoreductase, 2OG-Fe(II) oxygenase family protein | chr1:5817667-5819183 FORWARDweakly similar to ( 178) FLS_PETHY Flavonol synthase/flavanone 3-hydroxylase (EC 1.14.11.23) (EC 1.14.11.9) (FLS) - Petunia hybrida (Petunia) PcbC 2OG-FeII_Oxy protein|flavonol synthase/flavanone 3-hydroxylase, putative, expressed	-7.52404
16.8.4	secondary metabolism.flavonoids.flavonols	loc_os10g37899.1	Transcript	moderately similar to ( 296) AT4G16765 | Symbols: | oxidoreductase, 2OG-Fe(II) oxygenase family protein | chr4:9430467-9431791 REVERSEvery weakly similar to (91.7) LDOX_PETHY Leucoanthocyanidin dioxygenase (EC 1.14.11.19) (LDOX) (Leucocyanidin oxygenase) (Leucoanthocyanidin hydroxylase) - Petunia hybrida (Petunia) PcbC 2OG-FeII_Oxy protein|transposon protein, putative, unclassified, expressed	2.04112
16.8.4	secondary metabolism.flavonoids.flavonols	loc_os03g08624.1	Transcript	moderately similar to ( 426) AT4G33360 | Symbols: | terpene cyclase/mutase-related | chr4:16068123-16069374 REVERSE WcaG Epimerase GalE NAD_binding_4 RfbB protein|dihydroflavonol-4-reductase, putative, expressed	6.32636
16.8.4	secondary metabolism.flavonoids.flavonols	loc_os10g40934.12	Transcript	moderately similar to ( 301) AT1G17020 | Symbols: SRG1, ATSRG1 | SRG1 (SENESCENCE-RELATED GENE 1); oxidoreductase, acting on diphenols and related substances as donors, oxygen as acceptor / oxidoreductase, acting on paired donors, with incorporation or reduction of molecular oxygen, 2-oxoglutarate as one donor, and inc | chr1:5820258-5821741 FORWARDweakly similar to ( 185) FLS_PETHY Flavonol synt…	3.32145
16.10	secondary metabolism.simple phenols	loc_os11g48060.1	Transcript	highly similar to ( 760) AT2G38080 | Symbols: IRX12, LAC4 | IRX12 (IRREGULAR XYLEM 12); laccase | chr2:15934540-15937352 FORWARDmoderately similar to ( 202) ASO_CUCMA L-ascorbate oxidase precursor (EC 1.10.3.3) (Ascorbase) (ASO) - Cucurbita maxima (Pumpkin) (Winter squash) Cu-oxidase_3 Cu-oxidase Cu-oxidase_2 SufI protein|laccase-22 precursor, putative, expressed	1.71102
16.10	secondary metabolism.simple phenols	loc_os11g42220.1	Transcript	moderately similar to ( 456) AT3G09220 | Symbols: LAC7 | LAC7 (laccase 7); laccase | chr3:2827434-2830477 REVERSEmoderately similar to ( 228) ASO_CUCSA L-ascorbate oxidase precursor (EC 1.10.3.3) (Ascorbase) (ASO) - Cucumis sativus (Cucumber) Cu-oxidase_3 SufI Cu-oxidase_2 Cu-oxidase protein|laccase precursor protein, putative, expressed	-9.49707
16.10	secondary metabolism.simple phenols	loc_os11g42200.1	Transcript	moderately similar to ( 441) AT3G09220 | Symbols: LAC7 | LAC7 (laccase 7); laccase | chr3:2827434-2830477 REVERSEmoderately similar to ( 204) ASO_CUCSA L-ascorbate oxidase precursor (EC 1.10.3.3) (Ascorbase) (ASO) - Cucumis sativus (Cucumber) Cu-oxidase_3 Cu-oxidase_2 SufI Cu-oxidase protein|laccase precursor protein, putative, expressed	4.39184
16.99	secondary metabolism.unspecified	loc_os10g41150.1	Transcript	highly similar to ( 530) AT5G04620 | Symbols: ATBIOF | ATBIOF (BIOTIN F); 8-amino-7-oxononanoate synthase/ transaminase | chr5:1328004-1329934 FORWARD PRK05958 BioF PRK06939 PRK09064 PRK07505 PRK07179 Aminotran_1_2 PRK05937 protein|aminotransferase, classes I and II, domain containing protein, expressed	2.47757
16.99	secondary metabolism.unspecified	loc_os08g14770.1	Transcript	highly similar to ( 877) AT5G57590 | Symbols: BIO1 | BIO1 (biotin auxotroph 1); adenosylmethionine-8-amino-7-oxononanoate transaminase | chr5:23318593-23322687 REVERSE BioA PRK05964 PRK07030 PRK06916 PRK08466 PRK08742 Aminotran_3 PRK07894 PRK06943 PRK09044 PRK07986 PRK06173 GabT ArgD PRK07481 PRK05630 PRK07678 PRK07483 PRK09221 PRK06541 PRK08088 argD PRK07036 PRK06105 PRK08117 argD PRK11522 PRK06…	3.57351
17.1.1	hormone metabolism.abscisic acid.synthesis-degradation	loc_os03g04030.1	Transcript	moderately similar to ( 237) AT5G42560 | Symbols: | abscisic acid-responsive HVA22 family protein | chr5:17015703-17016969 FORWARD protein|HVA22, putative, expressed	1.86202
17.1.1	hormone metabolism.abscisic acid.synthesis-degradation	loc_os03g57680.1	Transcript	nearly identical (1394) AT5G20960 | Symbols: AAO1, AO1, ATAO, ATAO1 | AAO1 (ARABIDOPSIS ALDEHYDE OXIDASE 1); aldehyde oxidase/ indole-3-acetaldehyde oxidase | chr5:7116783-7122338 FORWARDnearly identical (2630) ALDO3_ORYSA Probable aldehyde oxidase 3 (EC 1.2.3.1) (AO-3) - Oryza sativa (Rice) Ald_Xan_dh_C2 XdhB CoxL PRK09970 XdhA PRK09800 FAD_binding_5 CoxS Fer2_2 Ald_Xan_dh_C PRK11433 CO_deh_flav…	4.80391
17.1.1	hormone metabolism.abscisic acid.synthesis-degradation	loc_os03g57690.1	Transcript	nearly identical (1400) AT5G20960 | Symbols: AAO1, AO1, ATAO, ATAO1 | AAO1 (ARABIDOPSIS ALDEHYDE OXIDASE 1); aldehyde oxidase/ indole-3-acetaldehyde oxidase | chr5:7116783-7122338 FORWARDnearly identical (2645) ALDO2_ORYSA Probable aldehyde oxidase 2 (EC 1.2.3.1) (AO-2) - Oryza sativa (Rice) Ald_Xan_dh_C2 XdhB CoxL PRK09970 XdhA PRK09800 FAD_binding_5 CoxS Ald_Xan_dh_C Fer2_2 PRK11433 CO_deh_flav…	2.26601
17.1.1	hormone metabolism.abscisic acid.synthesis-degradation	loc_os11g05800.1	Transcript	weakly similar to ( 151) AT2G36020 | Symbols: HVA22J | HVA22J (HVA22-LIKE PROTEIN J) | chr2:15123424-15125140 REVERSE protein|HVA22, putative, expressed	2.54517
17.1.1	hormone metabolism.abscisic acid.synthesis-degradation	loc_os10g04860.1	Transcript	nearly identical (1386) AT2G27150 | Symbols: AAO3 | AAO3 (Abscisic ALDEHYDE OXIDASE 3); abscisic aldehyde oxidase/ aldehyde oxidase/ indole-3-acetaldehyde oxidase | chr2:11601952-11607014 FORWARDnearly identical (2567) ALDO1_ORYSA Probable aldehyde oxidase 1 (EC 1.2.3.1) (AO-1) - Oryza sativa (Rice) Ald_Xan_dh_C2 XdhB CoxL PRK09970 XdhA PRK09800 FAD_binding_5 Ald_Xan_dh_C CoxS Fer2_2 CO_deh_flav_…	-1.89069
17.1.1.1.1	hormone metabolism.abscisic acid.synthesis-degradation.synthesis.zeaxanthin epoxidase	loc_os04g37619.1	Transcript	highly similar to ( 823) AT5G67030 | Symbols: ABA1, LOS6, NPQ2, ATABA1, ZEP, IBS3, ATZEP | ABA1 (ABA DEFICIENT 1); zeaxanthin epoxidase | chr5:26754026-26757090 REVERSEhighly similar to ( 872) ABA2_NICPL Zeaxanthin epoxidase, chloroplast precursor (EC 1.14.13.90) - Nicotiana plumbaginifolia (Leadwort-leaved tobacco) PRK08163 UbiH PRK06847 PRK06753 PRK07538 PRK07236 PRK06475 protein|zeaxanthin epo…	-4.62741
17.1.1.1.10	hormone metabolism.abscisic acid.synthesis-degradation.synthesis.9-cis-epoxycarotenoid dioxygenase	loc_os07g05940.1	Transcript	highly similar to ( 729) AT1G78390 | Symbols: NCED9, ATNCED9 | NCED9 (NINE-CIS-EPOXYCAROTENOID DIOXYGENASE 9); 9-cis-epoxycarotenoid dioxygenase | chr1:29490895-29492868 REVERSE RPE65 COG3670 protein|9-cis-epoxycarotenoid dioxygenase 1, chloroplast precursor, putative, expressed	-6.47621
17.1.1.1.10	hormone metabolism.abscisic acid.synthesis-degradation.synthesis.9-cis-epoxycarotenoid dioxygenase	loc_os03g44380.1	Transcript	highly similar to ( 752) AT3G14440 | Symbols: NCED3, ATNCED3, STO1, SIS7 | NCED3 (NINE-CIS-EPOXYCAROTENOID DIOXYGENASE 3); 9-cis-epoxycarotenoid dioxygenase | chr3:4831678-4833477 REVERSE RPE65 COG3670 protein|9-cis-epoxycarotenoid dioxygenase 1, chloroplast precursor, putative, expressed	-3.38514
17.1.1.1.10	hormone metabolism.abscisic acid.synthesis-degradation.synthesis.9-cis-epoxycarotenoid dioxygenase	loc_os12g44310.2	Transcript	highly similar to ( 860) AT3G63520 | Symbols: CCD1, ATCCD1, ATNCED1, NCED1 | CCD1 (CAROTENOID CLEAVAGE DIOXYGENASE 1); 9-cis-epoxycarotenoid dioxygenase | chr3:23452940-23455896 FORWARD RPE65 COG3670 protein|carotenoid cleavage dioxygenase, putative, expressed	-2.20993
17.1.1.1.10	hormone metabolism.abscisic acid.synthesis-degradation.synthesis.9-cis-epoxycarotenoid dioxygenase	loc_os12g42280.1	Transcript	highly similar to ( 712) AT1G78390 | Symbols: NCED9, ATNCED9 | NCED9 (NINE-CIS-EPOXYCAROTENOID DIOXYGENASE 9); 9-cis-epoxycarotenoid dioxygenase | chr1:29490895-29492868 REVERSE RPE65 COG3670 protein|9-cis-epoxycarotenoid dioxygenase 1, chloroplast precursor, putative, expressed	-5.31336
17.1.2	hormone metabolism.abscisic acid.signal transduction	loc_os02g52780.1	Transcript	weakly similar to ( 134) AT3G19290 | Symbols: ABF4, AREB2 | ABF4 (ABRE BINDING FACTOR 4); DNA binding / protein binding / transcription activator/ transcription factor | chr3:6687956-6689713 FORWARD protein|bZIP transcription factor, putative, expressed	-4.22755
17.1.2	hormone metabolism.abscisic acid.signal transduction	loc_os08g36790.1	Transcript	weakly similar to ( 131) AT3G19290 | Symbols: ABF4, AREB2 | ABF4 (ABRE BINDING FACTOR 4); DNA binding / protein binding / transcription activator/ transcription factor | chr3:6687956-6689713 FORWARD protein|bZIP transcription factor, putative, expressed	1.90488
17.1.2	hormone metabolism.abscisic acid.signal transduction	loc_os01g13200.1	Transcript	highly similar to ( 641) AT3G08550 | Symbols: ELD1, ABI8, KOB1 | KOB1 (KOBITO) | chr3:2596513-2599515 FORWARD protein|abscisic acid insensitive 8, putative, expressed	1.6976
17.1.2	hormone metabolism.abscisic acid.signal transduction	loc_os09g28310.1	Transcript	weakly similar to ( 115) AT3G19290 | Symbols: ABF4, AREB2 | ABF4 (ABRE BINDING FACTOR 4); DNA binding / protein binding / transcription activator/ transcription factor | chr3:6687956-6689713 FORWARD protein|bZIP transcription factor, putative, expressed	-2.28469
17.1.2	hormone metabolism.abscisic acid.signal transduction	loc_os08g01090.1	Transcript	weakly similar to ( 118) AT3G24650 | Symbols: ABI3, SIS10 | ABI3 (ABA INSENSITIVE 3); DNA binding / basal transcription repressor/ transcription activator/ transcription factor | chr3:8997911-9000780 FORWARDweakly similar to ( 108) VIV1_MAIZE Regulatory protein viviparous-1 - Zea mays (Maize) protein|B3 DNA binding domain containing protein, expressed	2.08833
17.1.3	hormone metabolism.abscisic acid.induced-regulated-responsive-activated	loc_os04g44510.1	Transcript	weakly similar to ( 183) AT5G08350 | Symbols: | GRAM domain-containing protein / ABA-responsive protein-related | chr5:2686417-2687175 REVERSE protein|GEM, putative, expressed	1.1764
17.1.3	hormone metabolism.abscisic acid.induced-regulated-responsive-activated	loc_os05g41070.1	Transcript	weakly similar to ( 177) AT3G56850 | Symbols: AREB3, DPBF3 | AREB3 (ABA-RESPONSIVE ELEMENT BINDING PROTEIN 3); DNA binding / transcription activator/ transcription factor | chr3:21046554-21047894 REVERSE protein|bZIP transcription factor, putative, expressed	1.60804
17.1.3	hormone metabolism.abscisic acid.induced-regulated-responsive-activated	loc_os03g08860.1	Transcript	moderately similar to ( 276) AT1G28200 | Symbols: FIP1 | FIP1 (FH INTERACTING PROTEIN 1) | chr1:9850395-9852300 REVERSE protein|GRAM domain containing protein, expressed	-3.82151
17.1.3	hormone metabolism.abscisic acid.induced-regulated-responsive-activated	loc_os02g42440.1	Transcript	weakly similar to ( 193) AT5G23370 | Symbols: | GRAM domain-containing protein / ABA-responsive protein-related | chr5:7863542-7864201 REVERSE protein|GEM, putative, expressed	1.98441
17.2.1	hormone metabolism.auxin.synthesis-degradation	loc_os04g44110.1	Transcript	moderately similar to ( 452) AT5G54140 | Symbols: ILL3 | ILL3; IAA-amino acid conjugate hydrolase/ metallopeptidase | chr5:21965833-21967834 FORWARDAbgB Peptidase_M20 protein|hydrolase, putative, expressed	1.77974
17.2.1	hormone metabolism.auxin.synthesis-degradation	loc_os01g37960.1	Transcript	highly similar to ( 538) AT1G51760 | Symbols: IAR3, JR3 | IAR3 (IAA-ALANINE RESISTANT 3); IAA-Ala conjugate hydrolase/ metallopeptidase | chr1:19199562-19201424 FORWARDAbgB Peptidase_M20 protein|hydrolase, putative, expressed	2.23118
17.2.1	hormone metabolism.auxin.synthesis-degradation	loc_os07g14590.1	Transcript	moderately similar to ( 419) AT3G02875 | Symbols: ILR1 | ILR1 (IAA-LEUCINE RESISTANT 1); IAA-Leu conjugate hydrolase/ IAA-Phe conjugate hydrolase/ metallopeptidase | chr3:631993-633859 FORWARDAbgB Peptidase_M20 ArgE PRK08588 protein|hydrolase, putative, expressed	1.51645
17.2.1	hormone metabolism.auxin.synthesis-degradation	loc_os01g51060.1	Transcript	moderately similar to ( 442) AT1G51760 | Symbols: IAR3, JR3 | IAR3 (IAA-ALANINE RESISTANT 3); IAA-Ala conjugate hydrolase/ metallopeptidase | chr1:19199562-19201424 FORWARDAbgB Peptidase_M20 protein|hydrolase, putative, expressed	-2.31082
17.2.2	hormone metabolism.auxin.signal transduction	loc_os01g69070.1	Transcript	moderately similar to ( 351) AT5G16530 | Symbols: PIN5 | PIN5 (PIN-FORMED 5); auxin:hydrogen symporter/ transporter | chr5:5400735-5402626 FORWARDhighly similar to ( 506) PIN6_ORYSA Probable auxin efflux carrier component 6 (OsPIN6) - Oryza sativa (Rice)Mem_trans protein|auxin efflux carrier component, putative, expressed	-2.42579
17.2.2	hormone metabolism.auxin.signal transduction	loc_os09g07300.1	Transcript	nearly identical (4185) AT3G02260 | Symbols: BIG, DOC1, TIR3, UMB1, ASA1, LPR1, CRM1 | BIG (BIG); binding / ubiquitin-protein ligase/ zinc ion binding | chr3:431152-448489 REVERSE protein|BIG, putative, expressed	1.66937
17.2.2	hormone metabolism.auxin.signal transduction	loc_os07g43720.1	Transcript	weakly similar to ( 183) AT3G28970 | Symbols: AAR3 | AAR3 (antiauxin-resistant 3) | chr3:10987970-10989782 REVERSE DUF298 protein|DCN1, putative, expressed	1.46599
17.2.2	hormone metabolism.auxin.signal transduction	loc_os03g08850.1	Transcript	highly similar to ( 603) AT5G49980 | Symbols: AFB5 | AFB5 (Auxin F-Box protein 5); ubiquitin-protein ligase | chr5:20334420-20336531 REVERSE protein|AUXIN SIGNALING F-BOX 2, putative, expressed	2.02369
17.2.2	hormone metabolism.auxin.signal transduction	loc_os09g07294.1	Transcript	highly similar to ( 954) AT3G02260 | Symbols: BIG, DOC1, TIR3, UMB1, ASA1, LPR1, CRM1 | BIG (BIG); binding / ubiquitin-protein ligase/ zinc ion binding | chr3:431152-448489 REVERSE protein|purity of essence, putative, expressed	1.64203
17.2.2	hormone metabolism.auxin.signal transduction	loc_os02g52230.1	Transcript	highly similar to ( 748) AT4G24390 | Symbols: | F-box family protein (FBX14) | chr4:12613909-12615966 REVERSE protein|coronatine-insensitive protein 1, putative, expressed	1.33323
17.2.3	hormone metabolism.auxin.induced-regulated-responsive-activated	loc_os07g40290.1	Transcript	highly similar to ( 905) AT4G37390 | Symbols: YDK1, GH3.2, BRU6, GH3-2, AUR3 | BRU6; indole-3-acetic acid amido synthetase | chr4:17579722-17581768 FORWARDnearly identical (1234) GH38_ORYSA Probable indole-3-acetic acid-amido synthetase GH3.8 (EC 6.3.2.-) (Auxin-responsive GH3-like protein 8) (OsGH3-8) - Oryza sativa (Rice)GH3 protein|OsGH3.8 - Probable indole-3-acetic acid-amido synthetase, expr…	-2.22829
17.2.3	hormone metabolism.auxin.induced-regulated-responsive-activated	loc_os09g37330.1	Transcript	very weakly similar to (88.2) AT5G27780 | Symbols: | auxin-responsive family protein | chr5:9838885-9839313 REVERSE protein|OsSAUR39 - Auxin-responsive SAUR gene family member, expressed	7.18019
17.2.3	hormone metabolism.auxin.induced-regulated-responsive-activated	loc_os02g42990.1	Transcript	very weakly similar to (84.0) AT2G45210 | Symbols: | auxin-responsive protein-related | chr2:18641884-18642372 FORWARDAuxin_inducible protein|OsSAUR11 - Auxin-responsive SAUR gene family member, expressed	-2.95468
17.2.3	hormone metabolism.auxin.induced-regulated-responsive-activated	loc_os04g52670.1	Transcript	protein|OsSAUR21 - Auxin-responsive SAUR gene family member, expressed	2.53557
17.2.3	hormone metabolism.auxin.induced-regulated-responsive-activated	loc_os04g58280.1	Transcript	weakly similar to ( 180) AT4G27450 | Symbols: | unknown protein | chr4:13727665-13728683 REVERSEweakly similar to ( 109) TSJT1_TOBAC Stem-specific protein TSJT1 - Nicotiana tabacum (Common tobacco)Wali7 protein|stem-specific protein TSJT1, putative, expressed	6.55922
17.2.3	hormone metabolism.auxin.induced-regulated-responsive-activated	loc_os02g16880.1	Transcript	moderately similar to ( 351) AT2G20120 | Symbols: COV1 | COV1 (CONTINUOUS VASCULAR RING) | chr2:8687568-8689321 REVERSEDUF502 COG2928 protein|protein of unknown function DUF502 domain containing protein, expressed	1.52559
17.2.3	hormone metabolism.auxin.induced-regulated-responsive-activated	loc_os10g36703.1	Transcript	very weakly similar to (85.9) AT2G46690 | Symbols: | auxin-responsive family protein | chr2:19180904-19181269 FORWARD protein|CPuORF40 - conserved peptide uORF-containing transcript, expressed	-5.38706
17.2.3	hormone metabolism.auxin.induced-regulated-responsive-activated	loc_os04g58280.2	Transcript	moderately similar to ( 331) AT4G27450 | Symbols: | unknown protein | chr4:13727665-13728683 REVERSEweakly similar to ( 110) TSJT1_TOBAC Stem-specific protein TSJT1 - Nicotiana tabacum (Common tobacco)Wali7 Gn_AT_II protein|stem-specific protein TSJT1, putative, expressed	5.82819
17.2.3	hormone metabolism.auxin.induced-regulated-responsive-activated	loc_os08g41280.1	Transcript	moderately similar to ( 328) AT3G25290 | Symbols: | auxin-responsive family protein | chr3:9208955-9210353 FORWARD B561 DUF568 protein|membrane protein, putative, expressed	-4.64977
17.2.3	hormone metabolism.auxin.induced-regulated-responsive-activated	loc_os02g52990.1	Transcript	protein|OsSAUR12 - Auxin-responsive SAUR gene family member, expressed	-2.96131
17.2.3	hormone metabolism.auxin.induced-regulated-responsive-activated	loc_os09g37480.1	Transcript	very weakly similar to (99.4) AT5G27780 | Symbols: | auxin-responsive family protein | chr5:9838885-9839313 REVERSE protein|OsSAUR53 - Auxin-responsive SAUR gene family member, expressed	-10.1137
17.2.3	hormone metabolism.auxin.induced-regulated-responsive-activated	loc_os11g05050.1	Transcript	moderately similar to ( 321) AT5G19140 | Symbols: ATAILP1, AILP1 | AILP1 | chr5:6423398-6425785 FORWARDweakly similar to ( 109) TSJT1_TOBAC Stem-specific protein TSJT1 - Nicotiana tabacum (Common tobacco)Wali7 protein|stem-specific protein TSJT1, putative, expressed	-2.21177
17.2.3	hormone metabolism.auxin.induced-regulated-responsive-activated	loc_os03g09880.1	Transcript	weakly similar to ( 102) AT5G48750 | Symbols: | auxin-responsive protein, putative | chr5:19770052-19770819 REVERSE DUF568 protein|AIR12, putative, expressed	-1.55302
17.2.3	hormone metabolism.auxin.induced-regulated-responsive-activated	loc_os05g45280.1	Transcript	moderately similar to ( 372) AT2G20120 | Symbols: COV1 | COV1 (CONTINUOUS VASCULAR RING) | chr2:8687568-8689321 REVERSEDUF502 COG2928 protein|protein of unknown function DUF502 domain containing protein, expressed	1.61319
17.2.3	hormone metabolism.auxin.induced-regulated-responsive-activated	loc_os09g24570.1	Transcript	highly similar to ( 733) AT4G24530 | Symbols: | unknown protein | chr4:12667424-12669713 REVERSEDUF246 protein|growth regulator related protein, putative, expressed	1.97352
17.2.3	hormone metabolism.auxin.induced-regulated-responsive-activated	loc_os01g43090.1	Transcript	moderately similar to ( 394) AT1G60690 | Symbols: | aldo/keto reductase family protein | chr1:22349892-22351668 REVERSEmoderately similar to ( 372) A115_TOBAC Auxin-induced protein PCNT115 - Nicotiana tabacum (Common tobacco) Tas Aldo_ket_red ARA1 COG4989 PRK10376 COG1453 PRK09912 PRK10625 dkgB protein|oxidoreductase, aldo/keto reductase family protein, putative, expressed	5.51825
17.2.3	hormone metabolism.auxin.induced-regulated-responsive-activated	loc_os08g42550.3	Transcript	highly similar to ( 600) AT1G52630 | Symbols: | unknown protein | chr1:19606470-19607848 REVERSEDUF246 protein|AP2 domain containing protein, expressed	4.67195
17.2.3	hormone metabolism.auxin.induced-regulated-responsive-activated	loc_os03g45850.1	Transcript	protein|OsSAUR16 - Auxin-responsive SAUR gene family member, expressed	-11.1083
17.2.3	hormone metabolism.auxin.induced-regulated-responsive-activated	loc_os06g11600.3	Transcript	highly similar to ( 553) AT1G22460 | Symbols: | unknown protein | chr1:7927530-7930351 REVERSEDUF246 protein|growth regulator related protein, putative, expressed	-3.57337
17.2.3	hormone metabolism.auxin.induced-regulated-responsive-activated	loc_os05g48270.1	Transcript	moderately similar to ( 307) AT3G61750 | Symbols: | auxin-responsive protein -related | chr3:22857897-22859254 REVERSE B561 protein|auxin-responsive protein, putative, expressed	-5.44342
17.2.3	hormone metabolism.auxin.induced-regulated-responsive-activated	loc_os02g07110.1	Transcript	Auxin_inducible protein|OsSAUR6 - Auxin-responsive SAUR gene family member, expressed	-2.08294
17.2.3	hormone metabolism.auxin.induced-regulated-responsive-activated	loc_os12g07540.1	Transcript	highly similar to ( 655) AT1G35510 | Symbols: | unknown protein | chr1:13071486-13074675 FORWARDDUF246 protein|growth regulator related protein, putative, expressed	-1.93323
17.2.3	hormone metabolism.auxin.induced-regulated-responsive-activated	loc_os06g47290.1	Transcript	highly similar to ( 702) AT3G26370 | Symbols: | unknown protein | chr3:9656886-9659741 FORWARDDUF246 protein|growth regulator related protein, putative, expressed	1.40288
17.2.3	hormone metabolism.auxin.induced-regulated-responsive-activated	loc_os01g48850.1	Transcript	moderately similar to ( 307) AT3G61750 | Symbols: | auxin-responsive protein -related | chr3:22857897-22859254 REVERSE B561 protein|auxin-responsive protein, putative, expressed	2.1548
17.2.3	hormone metabolism.auxin.induced-regulated-responsive-activated	loc_os08g35110.1	Transcript	very weakly similar to (85.5) AT5G20820 | Symbols: | auxin-responsive protein-related | chr5:7046911-7047294 REVERSE protein|OsSAUR33 - Auxin-responsive SAUR gene family member, expressed	-3.57447
17.2.3	hormone metabolism.auxin.induced-regulated-responsive-activated	loc_os11g44810.1	Transcript	weakly similar to ( 106) AT1G28330 | Symbols: | DYL1 (DORMANCY-ASSOCIATED PROTEIN-LIKE 1) | chr1:9934134-9935216 REVERSEweakly similar to ( 101) 12KD_FRAAN Auxin-repressed 12.5 kDa protein - Fragaria ananassa (Strawberry)Auxin_repressed protein|auxin-repressed protein, putative, expressed	5.93144
17.3.1.1.1	hormone metabolism.brassinosteroid.synthesis-degradation.BRs.DET2	loc_os01g63260.1	Transcript	weakly similar to ( 163) AT2G38050 | Symbols: DET2, DWF6, ATDET2 | DET2 (DE-ETIOLATED 2); sterol 5-alpha reductase | chr2:15921303-15922176 REVERSE Steroid_dh protein|3-oxo-5-alpha-steroid 4-dehydrogenase, putative, expressed	4.40405
17.3.1.1.1	hormone metabolism.brassinosteroid.synthesis-degradation.BRs.DET2	loc_os07g06800.1	Transcript	weakly similar to ( 198) AT5G16010 | Symbols: | 3-oxo-5-alpha-steroid 4-dehydrogenase family protein / steroid 5-alpha-reductase family protein | chr5:5227982-5229012 FORWARD Steroid_dh protein|3-oxo-5-alpha-steroid 4-dehydrogenase, putative, expressed	-7.80691
17.3.1.2.3	hormone metabolism.brassinosteroid.synthesis-degradation.sterols.CYP51	loc_os05g12040.1	Transcript	moderately similar to ( 483) AT1G11680 | Symbols: CYP51G1, EMB1738, CYP51A2, CYP51 | CYP51G1 (CYTOCHROME P450 51G1); oxygen binding / sterol 14-demethylase | chr1:3938925-3940585 FORWARDmoderately similar to ( 486) CP51_SORBI Cytochrome P450 51 (EC 1.14.13.70) (CYPLI) (P450-LIA1) (Obtusifoliol 14-alpha demethylase) - Sorghum bicolor (Sorghum) (Sorghum vulgare) p450 CypX protein|cytochrome P450 51…	-12.3
17.3.1.2.5	hormone metabolism.brassinosteroid.synthesis-degradation.sterols.HYD1	loc_os01g01369.1	Transcript	moderately similar to ( 228) AT1G20050 | Symbols: HYD1 | HYD1 (HYDRA1); C-8 sterol isomerase | chr1:6949160-6950135 FORWARDmoderately similar to ( 432) EBP_ORYSA Probable 3-beta-hydroxysteroid-Delta(8),Delta(7)-isomerase (EC 5.3.3.5) (Cholestenol Delta-isomerase) (Delta(8)-Delta(7) sterol isomerase) (D8-D7 sterol isomerase) - Oryza sativa (Rice) EBP protein|3-beta-hydroxysteroid-Delta-isomerase, …	2.15722
17.3.1.2.7	hormone metabolism.brassinosteroid.synthesis-degradation.sterols.DWF5	loc_os02g26650.3	Transcript	highly similar to ( 575) AT1G50430 | Symbols: DWF5, PA, LE, ST7R, 7RED | DWF5 (DWARF 5); sterol delta7 reductase | chr1:18682175-18685555 REVERSE ERG4_ERG24 protein|delta14-sterol reductase, putative, expressed	1.47737
17.3.1.2.99	hormone metabolism.brassinosteroid.synthesis-degradation.sterols.other	loc_os03g12910.1	Transcript	highly similar to ( 788) AT1G58440 | Symbols: XF1, SQE1 | XF1; squalene monooxygenase | chr1:21714094-21717246 REVERSEhighly similar to ( 806) ERG1_PANGI Squalene monooxygenase (EC 1.14.99.7) (Squalene epoxidase) (SE) - Panax ginseng (Korean ginseng) SE UbiH FixC PRK07045 PRK06185 protein|squalene monooxygenase, putative, expressed	-1.90094
17.3.2.2	hormone metabolism.brassinosteroid.signal transduction.BZR	loc_os02g13900.1	Transcript	weakly similar to ( 137) AT1G78700 | Symbols: | brassinosteroid signalling positive regulator-related | chr1:29599854-29601539 FORWARDDUF822 protein|BES1/BZR1 homolog protein, putative, expressed	4.64338
17.3.2.2	hormone metabolism.brassinosteroid.signal transduction.BZR	loc_os06g35900.1	Transcript	weakly similar to ( 188) AT1G78700 | Symbols: | brassinosteroid signalling positive regulator-related | chr1:29599854-29601539 FORWARDDUF822 protein|BES1/BZR1 homolog protein, putative, expressed	1.4571
17.3.2.2	hormone metabolism.brassinosteroid.signal transduction.BZR	loc_os01g10610.1	Transcript	moderately similar to ( 220) AT1G78700 | Symbols: | brassinosteroid signalling positive regulator-related | chr1:29599854-29601539 FORWARDDUF822 protein|BES1/BZR1 homolog protein, putative, expressed	1.92593
17.3.3	hormone metabolism.brassinosteroid.induced-regulated-responsive-activated	loc_os09g10770.1	Transcript	highly similar to ( 979) AT3G20780 | Symbols: ATTOP6B, BIN3, HYP6, RHL3 | ATTOP6B (topoisomerase 6 subunit B); DNA topoisomerase (ATP-hydrolyzing)/ identical protein binding / protein binding | chr3:7264025-7268498 REVERSEPRK04184 COG1389 Topo-VIb_trans TopoIIB_Trans protein|OsTOP6B - Topoisomerase 6 subunit B, expressed	2.05015
17.4.1	hormone metabolism.cytokinin.synthesis-degradation	loc_os01g73760.1	Transcript	moderately similar to ( 418) AT2G27760 | Symbols: ATIPT2, IPPT | ATIPT2 (TRNA ISOPENTENYLTRANSFERASE 2); adenylate dimethylallyltransferase/ tRNA isopentenyltransferase | chr2:11824860-11827432 FORWARD miaA MiaA IPPT protein|IPP transferase, putative, expressed	2.47201
17.4.1	hormone metabolism.cytokinin.synthesis-degradation	loc_os08g35860.1	Transcript	highly similar to ( 506) AT5G21482 | Symbols: CKX7, ATCKX5 | CKX7 (CYTOKININ OXIDASE 7); cytokinin dehydrogenase/ oxidoreductase | chr5:7226842-7230052 FORWARDmoderately similar to ( 310) CKX1_MAIZE Cytokinin dehydrogenase 1 precursor (EC 1.5.99.12) (Cytokinin oxidase 1) (CKO 1) (COX 1) (ZmCKX1) - Zea mays (Maize) Cytokin-bind GlcD FAD_binding_4 protein|cytokinin dehydrogenase precursor, putative…	3.62612
17.4.1	hormone metabolism.cytokinin.synthesis-degradation	loc_os01g10110.1	Transcript	moderately similar to ( 392) AT5G56970 | Symbols: CKX3, ATCKX3 | CKX3 (CYTOKININ OXIDASE 3); amine oxidase/ cytokinin dehydrogenase | chr5:23044944-23048245 REVERSEmoderately similar to ( 429) CKX1_MAIZE Cytokinin dehydrogenase 1 precursor (EC 1.5.99.12) (Cytokinin oxidase 1) (CKO 1) (COX 1) (ZmCKX1) - Zea mays (Maize) Cytokin-bind GlcD FAD_binding_4 protein|cytokinin dehydrogenase precursor, put…	-1.62197
17.4.1	hormone metabolism.cytokinin.synthesis-degradation	loc_os01g71310.1	Transcript	highly similar to ( 656) AT2G41510 | Symbols: ATCKX1, CKX1 | CKX1 (CYTOKININ OXIDASE/DEHYDROGENASE 1); cytokinin dehydrogenase | chr2:17314626-17316861 FORWARDmoderately similar to ( 416) CKX1_MAIZE Cytokinin dehydrogenase 1 precursor (EC 1.5.99.12) (Cytokinin oxidase 1) (CKO 1) (COX 1) (ZmCKX1) - Zea mays (Maize) Cytokin-bind GlcD FAD_binding_4 protein|cytokinin dehydrogenase precursor, putative…	-6.00329
17.4.2	hormone metabolism.cytokinin.signal transduction	loc_os09g36030.1	Transcript	moderately similar to ( 284) AT4G10750 | Symbols: | HpcH/HpaI aldolase family protein | chr4:6618724-6619800 FORWARDHpcH HpcH_HpaI PRK10558 PRK10128 protein|4-hydroxy-2-oxovalerate aldolase, putative, expressed	3.80688
17.5.1	hormone metabolism.ethylene.synthesis-degradation	loc_os09g27820.1	Transcript	moderately similar to ( 408) AT1G05010 | Symbols: EFE, ACO4, EAT1 | EFE (ETHYLENE-FORMING ENZYME); 1-aminocyclopropane-1-carboxylate oxidase | chr1:1431419-1432695 REVERSEhighly similar to ( 612) ACCO1_ORYSA 1-aminocyclopropane-1-carboxylate oxidase 1 (EC 1.14.17.4) (ACC oxidase 1) (Ethylene-forming enzyme) (EFE) - Oryza sativa (Rice) PcbC 2OG-FeII_Oxy protein|1-aminocyclopropane-1-carboxylate ox…	-1.55338
17.5.1	hormone metabolism.ethylene.synthesis-degradation	loc_os06g14400.1	Transcript	moderately similar to ( 241) AT2G30830 | Symbols: | 2-oxoglutarate-dependent dioxygenase, putative | chr2:13132707-13134284 REVERSEweakly similar to ( 200) DV4H_CATRO Desacetoxyvindoline 4-hydroxylase (EC 1.14.11.20) - Catharanthus roseus (Rosy periwinkle) (Madagascar periwinkle) PcbC 2OG-FeII_Oxy protein|1-aminocyclopropane-1-carboxylate oxidase homolog 4, putative, expressed	3.99952
17.5.1	hormone metabolism.ethylene.synthesis-degradation	loc_os09g02710.1	Transcript	moderately similar to ( 224) AT4G36910 | Symbols: LEJ2, CDCP2 | LEJ2 (LOSS OF THE TIMING OF ET AND JA BIOSYNTHESIS 2) | chr4:17391016-17393218 REVERSECBS CBS_pair_16 CBS_pair_BON_assoc CBS_pair_15 CBS_pair_23 CBS_pair_21 CBS_pair protein|CBS domain containing membrane protein, putative, expressed	-3.6314
17.5.1	hormone metabolism.ethylene.synthesis-degradation	loc_os10g41020.1	Transcript	moderately similar to ( 313) AT4G25300 | Symbols: | oxidoreductase, 2OG-Fe(II) oxygenase family protein | chr4:12945780-12946642 FORWARDweakly similar to ( 195) FLS_PETHY Flavonol synthase/flavanone 3-hydroxylase (EC 1.14.11.23) (EC 1.14.11.9) (FLS) - Petunia hybrida (Petunia) PcbC 2OG-FeII_Oxy protein|flavonol synthase/flavanone 3-hydroxylase, putative, expressed	3.78088
17.5.1	hormone metabolism.ethylene.synthesis-degradation	loc_os03g64280.1	Transcript	moderately similar to ( 278) AT1G06620 | Symbols: | 2-oxoglutarate-dependent dioxygenase, putative | chr1:2025618-2027094 FORWARDmoderately similar to ( 217) DV4H_CATRO Desacetoxyvindoline 4-hydroxylase (EC 1.14.11.20) - Catharanthus roseus (Rosy periwinkle) (Madagascar periwinkle) PcbC protein|1-aminocyclopropane-1-carboxylate oxidase homolog 1, putative, expressed	2.21556
17.5.1	hormone metabolism.ethylene.synthesis-degradation	loc_os08g30210.1	Transcript	moderately similar to ( 285) AT1G06620 | Symbols: | 2-oxoglutarate-dependent dioxygenase, putative | chr1:2025618-2027094 FORWARDmoderately similar to ( 248) DV4H_CATRO Desacetoxyvindoline 4-hydroxylase (EC 1.14.11.20) - Catharanthus roseus (Rosy periwinkle) (Madagascar periwinkle) PcbC 2OG-FeII_Oxy protein|1-aminocyclopropane-1-carboxylate oxidase homolog 1, putative, expressed	-5.3928
17.5.1	hormone metabolism.ethylene.synthesis-degradation	loc_os10g40934.7	Transcript	moderately similar to ( 253) AT1G17020 | Symbols: SRG1, ATSRG1 | SRG1 (SENESCENCE-RELATED GENE 1); oxidoreductase, acting on diphenols and related substances as donors, oxygen as acceptor / oxidoreductase, acting on paired donors, with incorporation or reduction of molecular oxygen, 2-oxoglutarate as one donor, and inc | chr1:5820258-5821741 FORWARDweakly similar to ( 149) FLS_PETHY Flavonol synt…	6.02189
17.5.1	hormone metabolism.ethylene.synthesis-degradation	loc_os04g33360.1	Transcript	weakly similar to ( 194) AT5G58660 | Symbols: | oxidoreductase, 2OG-Fe(II) oxygenase family protein | chr5:23701509-23703802 FORWARDweakly similar to ( 112) ACCO1_PETHY 1-aminocyclopropane-1-carboxylate oxidase 1 (EC 1.14.17.4) (ACC oxidase 1) (Ethylene-forming enzyme) (EFE) (ACCO) - Petunia hybrida (Petunia) PcbC 2OG-FeII_Oxy protein|gibberellin 2-beta-dioxygenase 7, putative, expressed	2.49893
17.5.1	hormone metabolism.ethylene.synthesis-degradation	loc_os03g48430.1	Transcript	moderately similar to ( 250) AT1G06650 | Symbols: | 2-oxoglutarate-dependent dioxygenase, putative | chr1:2035909-2037186 FORWARDmoderately similar to ( 226) DV4H_CATRO Desacetoxyvindoline 4-hydroxylase (EC 1.14.11.20) - Catharanthus roseus (Rosy periwinkle) (Madagascar periwinkle) PcbC 2OG-FeII_Oxy protein|1-aminocyclopropane-1-carboxylate oxidase homolog 4, putative, expressed	1.56961
17.5.1	hormone metabolism.ethylene.synthesis-degradation	loc_os01g25010.1	Transcript	moderately similar to ( 291) AT1G17010 | Symbols: | oxidoreductase, 2OG-Fe(II) oxygenase family protein | chr1:5817667-5819183 FORWARDweakly similar to ( 178) FLS_PETHY Flavonol synthase/flavanone 3-hydroxylase (EC 1.14.11.23) (EC 1.14.11.9) (FLS) - Petunia hybrida (Petunia) PcbC 2OG-FeII_Oxy protein|flavonol synthase/flavanone 3-hydroxylase, putative, expressed	-7.52404
17.5.1	hormone metabolism.ethylene.synthesis-degradation	loc_os01g39860.1	Transcript	moderately similar to ( 248) AT2G19590 | Symbols: ACO1 | ACO1 (ACC OXIDASE 1); 1-aminocyclopropane-1-carboxylate oxidase | chr2:8476239-8477354 REVERSEmoderately similar to ( 211) ACCO1_ORYSA 1-aminocyclopropane-1-carboxylate oxidase 1 (EC 1.14.17.4) (ACC oxidase 1) (Ethylene-forming enzyme) (EFE) - Oryza sativa (Rice) PcbC protein|1-aminocyclopropane-1-carboxylate oxidase protein, putative, expr…	-4.15248
17.5.1	hormone metabolism.ethylene.synthesis-degradation	loc_os01g55240.1	Transcript	moderately similar to ( 341) AT1G30040 | Symbols: ATGA2OX2 | ATGA2OX2 (GIBBERELLIN 2-OXIDASE); gibberellin 2-beta-dioxygenase | chr1:10537769-10538781 FORWARDmoderately similar to ( 354) G2OX1_PEA Gibberellin 2-beta-dioxygenase 1 (EC 1.14.11.13) (Gibberellin 2-beta-hydroxylase 1) (Gibberellin 2-oxidase 1) (GA 2-oxidase 1) (Protein SLENDER) - Pisum sativum (Garden pea) PcbC 2OG-FeII_Oxy protein|gi…	-2.18348
17.5.1	hormone metabolism.ethylene.synthesis-degradation	loc_os07g07410.2	Transcript	moderately similar to ( 215) AT4G10490 | Symbols: | oxidoreductase, 2OG-Fe(II) oxygenase family protein | chr4:6483900-6485179 FORWARDweakly similar to ( 172) FL3H_MALDO Naringenin,2-oxoglutarate 3-dioxygenase (EC 1.14.11.9) (Flavonone-3-hydroxylase) (F3H) (FHT) - Malus domestica (Apple) (Malus sylvestris) PcbC 2OG-FeII_Oxy protein|oxidoreductase, 2OG-Fe oxygenase family protein, putative, expres…	8.66414
17.5.1	hormone metabolism.ethylene.synthesis-degradation	loc_os08g22149.1	Transcript	moderately similar to ( 261) AT4G36910 | Symbols: LEJ2, CDCP2 | LEJ2 (LOSS OF THE TIMING OF ET AND JA BIOSYNTHESIS 2) | chr4:17391016-17393218 REVERSECBS_pair_23 CBS CBS_pair_16 CBS_pair_BON_assoc CBS_pair_15 CBS_pair CBS_pair_21 protein|CBS domain containing membrane protein, putative, expressed	-1.71618
17.5.1	hormone metabolism.ethylene.synthesis-degradation	loc_os08g30150.1	Transcript	weakly similar to ( 200) AT1G06620 | Symbols: | 2-oxoglutarate-dependent dioxygenase, putative | chr1:2025618-2027094 FORWARDweakly similar to ( 170) DV4H_CATRO Desacetoxyvindoline 4-hydroxylase (EC 1.14.11.20) - Catharanthus roseus (Rosy periwinkle) (Madagascar periwinkle) PcbC 2OG-FeII_Oxy protein|1-aminocyclopropane-1-carboxylate oxidase homolog 1, putative, expressed	-3.49233
17.5.1	hormone metabolism.ethylene.synthesis-degradation	loc_os03g63900.1	Transcript	moderately similar to ( 283) AT1G17020 | Symbols: SRG1, ATSRG1 | SRG1 (SENESCENCE-RELATED GENE 1); oxidoreductase, acting on diphenols and related substances as donors, oxygen as acceptor / oxidoreductase, acting on paired donors, with incorporation or reduction of molecular oxygen, 2-oxoglutarate as one donor, and inc | chr1:5820258-5821741 FORWARDweakly similar to ( 162) ACCO2_MALDO 1-aminocycl…	3.06647
17.5.1	hormone metabolism.ethylene.synthesis-degradation	loc_os10g40960.1	Transcript	weakly similar to ( 155) AT1G78550 | Symbols: | oxidoreductase, 2OG-Fe(II) oxygenase family protein | chr1:29545031-29546360 REVERSEweakly similar to ( 115) ACCO1_ORYSA 1-aminocyclopropane-1-carboxylate oxidase 1 (EC 1.14.17.4) (ACC oxidase 1) (Ethylene-forming enzyme) (EFE) - Oryza sativa (Rice) 2OG-FeII_Oxy PcbC protein|oxidoreductase, 2OG-Fe oxygenase family protein, putative, expressed	2.08044
17.5.1	hormone metabolism.ethylene.synthesis-degradation	loc_os04g49210.1	Transcript	moderately similar to ( 410) AT4G10500 | Symbols: | oxidoreductase, 2OG-Fe(II) oxygenase family protein | chr4:6491089-6492342 FORWARDweakly similar to ( 199) FL3H_DIACA Naringenin,2-oxoglutarate 3-dioxygenase (EC 1.14.11.9) (Flavonone-3-hydroxylase) (F3H) (FHT) - Dianthus caryophyllus (Carnation) (Clove pink) PcbC 2OG-FeII_Oxy protein|naringenin,2-oxoglutarate 3-dioxygenase, putative, expressed	-6.44342
17.5.1	hormone metabolism.ethylene.synthesis-degradation	loc_os03g42130.1	Transcript	moderately similar to ( 307) AT3G19000 | Symbols: | oxidoreductase, 2OG-Fe(II) oxygenase family protein | chr3:6554004-6554987 REVERSEweakly similar to ( 147) FL3H_VITVI Naringenin,2-oxoglutarate 3-dioxygenase (EC 1.14.11.9) (Flavonone-3-hydroxylase) (F3H) (FHT) - Vitis vinifera (Grape) PcbC 2OG-FeII_Oxy protein|gibberellin 20 oxidase 2, putative, expressed	-3.49447
17.5.1	hormone metabolism.ethylene.synthesis-degradation	loc_os10g40934.12	Transcript	moderately similar to ( 301) AT1G17020 | Symbols: SRG1, ATSRG1 | SRG1 (SENESCENCE-RELATED GENE 1); oxidoreductase, acting on diphenols and related substances as donors, oxygen as acceptor / oxidoreductase, acting on paired donors, with incorporation or reduction of molecular oxygen, 2-oxoglutarate as one donor, and inc | chr1:5820258-5821741 FORWARDweakly similar to ( 185) FLS_PETHY Flavonol synt…	3.32145
17.5.1	hormone metabolism.ethylene.synthesis-degradation	loc_os06g06720.1	Transcript	moderately similar to ( 355) AT4G16330 | Symbols: | oxidoreductase/ oxidoreductase, acting on paired donors, with incorporation or reduction of molecular oxygen, 2-oxoglutarate as one donor, and incorporation of one atom each of oxygen into both donors | chr4:9226298-9227235 REVERSEmoderately similar to ( 207) LDOX_MALDO Leucoanthocyanidin dioxygenase (EC 1.14.11.19) (LDOX) (Leucocyanidin oxygena…	2.11998
17.5.2	hormone metabolism.ethylene.signal transduction	loc_os09g35010.1	Transcript	protein|dehydration-responsive element-binding protein, putative, expressed	-7.55945
17.5.2	hormone metabolism.ethylene.signal transduction	loc_os06g36490.1	Transcript	moderately similar to ( 216) AT4G17486 | Symbols: | unknown protein | chr4:9750063-9751201 REVERSE DUF862 protein|ethylene-responsive element-binding protein, putative, expressed	1.73287
17.5.2	hormone metabolism.ethylene.signal transduction	loc_os01g66270.1	Transcript	protein|AP2 domain containing protein, expressed	-10.9133
17.5.2	hormone metabolism.ethylene.signal transduction	loc_os08g30520.1	Transcript	weakly similar to ( 142) AT3G50180 | Symbols: | unknown protein | chr3:18604943-18607162 REVERSEDUF247 protein|plant protein of unknown function domain containing protein, expressed	9.79038
17.5.2	hormone metabolism.ethylene.signal transduction	loc_os02g43820.1	Transcript	very weakly similar to (93.6) AT5G47230 | Symbols: ERF5, ATERF-5, ATERF5 | ERF5 (ETHYLENE RESPONSIVE ELEMENT BINDING FACTOR 5); DNA binding / transcription activator/ transcription factor | chr5:19180072-19180974 FORWARDvery weakly similar to (86.7) ERF5_NICSY Ethylene-responsive transcription factor 5 (Ethylene-responsive element-binding factor 5 homolog) (EREBP-4) (NsERF4) - Nicotiana sylvestri…	5.88216
17.5.2	hormone metabolism.ethylene.signal transduction	loc_os03g19700.1	Transcript	weakly similar to ( 150) AT3G50170 | Symbols: | unknown protein | chr3:18602337-18603738 REVERSEDUF247 protein|plant protein of unknown function domain containing protein, expressed	3.06561
17.5.2	hormone metabolism.ethylene.signal transduction	loc_os08g36920.1	Transcript	very weakly similar to (88.2) AT4G34410 | Symbols: RRTF1 | RRTF1 ({REDOX RESPONSIVE TRANSCRIPTION FACTOR 1); DNA binding / transcription factor | chr4:16451992-16452798 FORWARDAP2 AP2 protein|AP2 domain containing protein, expressed	-10.0462
17.5.2	hormone metabolism.ethylene.signal transduction	loc_os01g58420.1	Transcript	very weakly similar to (80.1) AT5G44210 | Symbols: ERF9, ATERF9, ATERF-9 | ERF9 (ERF DOMAIN PROTEIN 9); DNA binding / transcription factor/ transcription repressor | chr5:17806742-17807344 FORWARDAP2 AP2 protein|AP2 domain containing protein, expressed	-3.48856
17.5.2	hormone metabolism.ethylene.signal transduction	loc_os03g08490.1	Transcript	AP2 AP2 protein|AP2 domain containing protein, expressed	1.9185
17.5.2	hormone metabolism.ethylene.signal transduction	loc_os04g46220.1	Transcript	weakly similar to ( 110) AT4G17500 | Symbols: ATERF-1 | ATERF-1 (ETHYLENE RESPONSIVE ELEMENT BINDING FACTOR 1); DNA binding / transcription activator/ transcription factor | chr4:9759405-9760211 FORWARDweakly similar to ( 106) ERF2_NICSY Ethylene-responsive transcription factor 2 (Ethylene-responsive element-binding factor 2) (EREBP-2) (NsERF2) - Nicotiana sylvestris (Wood tobacco)AP2 AP2 protein…	3.32917
17.5.2	hormone metabolism.ethylene.signal transduction	loc_os04g52090.1	Transcript	very weakly similar to (81.3) ERF4_TOBAC Ethylene-responsive transcription factor 4 (Ethylene-responsive element-binding factor 4 homolog) (EREBP-3) (NtERF3) - Nicotiana tabacum (Common tobacco)AP2 AP2 protein|AP2 domain containing protein, expressed	-3.4377
17.5.2	hormone metabolism.ethylene.signal transduction	loc_os02g52670.1	Transcript	AP2 AP2 protein|AP2 domain containing protein, expressed	-11.6858
17.5.2	hormone metabolism.ethylene.signal transduction	loc_os01g38190.1	Transcript	weakly similar to ( 199) AT3G50150 | Symbols: | unknown protein | chr3:18595809-18597551 REVERSEDUF247 protein|plant protein of unknown function domain containing protein, expressed	4.36875
17.5.2	hormone metabolism.ethylene.signal transduction	loc_os08g43210.1	Transcript	protein|AP2 domain containing protein, expressed	1.46518
17.5.2	hormone metabolism.ethylene.signal transduction	loc_os02g09650.1	Transcript	AP2 AP2 protein|AP2 domain containing protein, expressed	1.40863
17.5.2	hormone metabolism.ethylene.signal transduction	loc_os11g33970.1	Transcript	weakly similar to ( 192) AT3G50160 | Symbols: | unknown protein | chr3:18598826-18600903 REVERSEDUF247 protein|plant protein of unknown function domain containing protein, expressed	1.84279
17.5.2	hormone metabolism.ethylene.signal transduction	loc_os05g41780.1	Transcript	AP2 AP2 protein|AP2 domain containing protein, expressed	-1.65668
17.5.2	hormone metabolism.ethylene.signal transduction	loc_os05g41760.1	Transcript	very weakly similar to (82.4) AT1G28360 | Symbols: ERF12, ATERF12 | ERF12 (ERF DOMAIN PROTEIN 12); DNA binding / transcription factor/ transcription repressor | chr1:9951934-9952503 FORWARDAP2 AP2 protein|AP2 domain containing protein, expressed	-2.82937
17.5.2	hormone metabolism.ethylene.signal transduction	loc_os08g42570.1	Transcript	weakly similar to ( 134) AT3G50130 | Symbols: | unknown protein | chr3:18589111-18591222 REVERSEDUF247 protein|plant protein of unknown function domain containing protein, expressed	3.75441
17.5.2	hormone metabolism.ethylene.signal transduction	loc_os03g10200.1	Transcript	moderately similar to ( 298) AT1G47740 | Symbols: | unknown protein | chr1:17567903-17569035 FORWARD DUF862 protein|ethylene-responsive element-binding protein, putative, expressed	1.55982
17.5.2	hormone metabolism.ethylene.signal transduction	loc_os01g64790.1	Transcript	AP2 AP2 protein|AP2 domain containing protein, expressed	-4.3005
17.5.2	hormone metabolism.ethylene.signal transduction	loc_os09g39850.1	Transcript	weakly similar to ( 117) AT3G23240 | Symbols: ERF1, ATERF1 | ERF1 (ETHYLENE RESPONSE FACTOR 1); DNA binding / transcription activator/ transcription factor | chr3:8295705-8296361 FORWARDvery weakly similar to (90.5) ERF5_NICSY Ethylene-responsive transcription factor 5 (Ethylene-responsive element-binding factor 5 homolog) (EREBP-4) (NsERF4) - Nicotiana sylvestris (Wood tobacco)AP2 AP2 protein|AP…	6.89434
17.5.2	hormone metabolism.ethylene.signal transduction	loc_os05g25260.1	Transcript	AP2 AP2 protein|AP2 domain containing protein, expressed	3.43525
17.5.2	hormone metabolism.ethylene.signal transduction	loc_os10g41330.2	Transcript	very weakly similar to (95.5) AT5G51190 | Symbols: | AP2 domain-containing transcription factor, putative | chr5:20800708-20801373 REVERSEvery weakly similar to (93.6) ERF5_TOBAC Ethylene-responsive transcription factor 5 (Ethylene-responsive element-binding factor 5 homolog) (EREBP-4) (NtERF4) - Nicotiana tabacum (Common tobacco)AP2 AP2 protein|AP2 domain containing protein, expressed	-1.75947
17.5.3	hormone metabolism.ethylene.induced-regulated-responsive-activated	loc_os01g32780.1	Transcript	weakly similar to ( 105) AT1G68300 | Symbols: | universal stress protein (USP) family protein | chr1:25598518-25599261 REVERSEUSP_Like Usp UspA protein|universal stress protein domain containing protein, putative, expressed	1.60466
17.5.3	hormone metabolism.ethylene.induced-regulated-responsive-activated	loc_os12g36630.1	Transcript	weakly similar to ( 160) AT2G47710 | Symbols: | universal stress protein (USP) family protein | chr2:19555045-19555956 REVERSEUsp USP_Like protein|universal stress protein domain containing protein, putative, expressed	4.93812
17.5.3	hormone metabolism.ethylene.induced-regulated-responsive-activated	loc_os05g28740.1	Transcript	weakly similar to ( 118) AT3G62550 | Symbols: | universal stress protein (USP) family protein | chr3:23136194-23137074 FORWARDUSP_Like Usp protein|universal stress protein domain containing protein, putative, expressed	6.94465
17.5.3	hormone metabolism.ethylene.induced-regulated-responsive-activated	loc_os12g36640.2	Transcript	weakly similar to ( 195) AT2G47710 | Symbols: | universal stress protein (USP) family protein | chr2:19555045-19555956 REVERSE protein|universal stress protein domain containing protein, putative, expressed	6.9882
17.5.3	hormone metabolism.ethylene.induced-regulated-responsive-activated	loc_os02g52314.1	Transcript	moderately similar to ( 201) AT1G09740 | Symbols: | ethylene-responsive protein, putative | chr1:3154603-3155834 FORWARDUSP_Like Usp protein|BTB1 - Bric-a-Brac,Tramtrack, Broad Complex BTB domain, expressed	2.32145
17.6.1	hormone metabolism.gibberelin.synthesis-degradation	loc_os05g50090.1	Transcript	weakly similar to ( 124) AT1G52820 | Symbols: | 2-oxoglutarate-dependent dioxygenase, putative | chr1:19669216-19670321 FORWARD protein|oxidoreductase, 2OG-FeII oxygenase domain containing protein, putative, expressed	5.38034
17.6.1	hormone metabolism.gibberelin.synthesis-degradation	loc_os08g32160.1	Transcript	weakly similar to ( 195) AT1G52820 | Symbols: | 2-oxoglutarate-dependent dioxygenase, putative | chr1:19669216-19670321 FORWARDvery weakly similar to (89.4) GAO1D_WHEAT Gibberellin 20 oxidase 1-D (EC 1.14.11.-) (Gibberellin C-20 oxidase 1-D) (GA 20-oxidase 1-D) (Ta20ox1D) (TaGA20ox1-D) (Protein Wga20) - Triticum aestivum (Wheat) PcbC protein|oxidoreductase, 2OG-FeII oxygenase domain containing pr…	2.87994
17.6.1.1	hormone metabolism.gibberelin.synthesis-degradation.copalyl diphosphate synthase	loc_os09g15050.1	Transcript	moderately similar to ( 285) AT4G02780 | Symbols: GA1, ABC33, ATCPS1 | GA1 (GA REQUIRING 1); ent-copalyl diphosphate synthase/ magnesium ion binding | chr4:1237881-1244766 REVERSEmoderately similar to ( 276) KSA_PEA Ent-kaurene synthase A, chloroplast precursor (EC 5.5.1.13) (Ent-copalyl diphosphate synthase) (KSA) - Pisum sativum (Garden pea) protein|ent-kaurene synthase A, chloroplast precursor…	5.87604
17.6.1.11	hormone metabolism.gibberelin.synthesis-degradation.GA20 oxidase	loc_os05g34854.2	Transcript	moderately similar to ( 209) AT5G51810 | Symbols: GA20OX2, AT2353, ATGA20OX2 | GA20OX2 (GIBBERELLIN 20 OXIDASE 2); gibberellin 20-oxidase | chr5:21055389-21056746 REVERSEmoderately similar to ( 256) GAOX2_ORYSA Gibberellin 20 oxidase 2 (EC 1.14.11.-) (Gibberellin C-20 oxidase 2) (GA 20-oxidase 2) (Os20ox2) (Semidwarf-1 protein) - Oryza sativa (Rice) PcbC protein|gibberellin 20 oxidase 2, putative…	5.47525
17.6.1.11	hormone metabolism.gibberelin.synthesis-degradation.GA20 oxidase	loc_os05g34854.1	Transcript	moderately similar to ( 321) AT4G25420 | Symbols: GA5, GA20OX1, AT2301, ATGA20OX1 | GA20OX1; gibberellin 20-oxidase | chr4:12990982-12992409 REVERSEmoderately similar to ( 383) GAOX2_ORYSA Gibberellin 20 oxidase 2 (EC 1.14.11.-) (Gibberellin C-20 oxidase 2) (GA 20-oxidase 2) (Os20ox2) (Semidwarf-1 protein) - Oryza sativa (Rice) PcbC 2OG-FeII_Oxy protein|gibberellin 20 oxidase 2, putative, express…	2.95372
17.6.1.11	hormone metabolism.gibberelin.synthesis-degradation.GA20 oxidase	loc_os01g66100.1	Transcript	moderately similar to ( 369) AT4G25420 | Symbols: GA5, GA20OX1, AT2301, ATGA20OX1 | GA20OX1; gibberellin 20-oxidase | chr4:12990982-12992409 REVERSEhighly similar to ( 655) GAOX2_ORYSA Gibberellin 20 oxidase 2 (EC 1.14.11.-) (Gibberellin C-20 oxidase 2) (GA 20-oxidase 2) (Os20ox2) (Semidwarf-1 protein) - Oryza sativa (Rice) PcbC 2OG-FeII_Oxy protein|gibberellin 20 oxidase 2, putative, expressed	4.41956
17.6.1.13	hormone metabolism.gibberelin.synthesis-degradation.GA2 oxidase	loc_os01g11150.1	Transcript	moderately similar to ( 240) AT1G78440 | Symbols: ATGA2OX1 | ATGA2OX1 (gibberellin 2-oxidase 1); gibberellin 2-beta-dioxygenase | chr1:29511772-29512990 REVERSEmoderately similar to ( 241) G2OX1_PEA Gibberellin 2-beta-dioxygenase 1 (EC 1.14.11.13) (Gibberellin 2-beta-hydroxylase 1) (Gibberellin 2-oxidase 1) (GA 2-oxidase 1) (Protein SLENDER) - Pisum sativum (Garden pea) PcbC 2OG-FeII_Oxy protein|…	-4.1704
17.6.1.13	hormone metabolism.gibberelin.synthesis-degradation.GA2 oxidase	loc_os05g06670.1	Transcript	moderately similar to ( 280) AT1G02400 | Symbols: ATGA2OX4, ATGA2OX6, DTA1, GA2OX6 | GA2OX6 (GIBBERELLIN 2-OXIDASE 6); gibberellin 2-beta-dioxygenase | chr1:486964-489391 FORWARDmoderately similar to ( 278) G2OX2_PEA Gibberellin 2-beta-dioxygenase 2 (EC 1.14.11.13) (Gibberellin 2-beta-hydroxylase 2) (Gibberellin 2-oxidase 2) (GA 2-oxidase 2) - Pisum sativum (Garden pea) PcbC protein|gibberellin 2…	9.51281
17.7.1	hormone metabolism.jasmonate.synthesis-degradation	loc_os09g02710.1	Transcript	moderately similar to ( 224) AT4G36910 | Symbols: LEJ2, CDCP2 | LEJ2 (LOSS OF THE TIMING OF ET AND JA BIOSYNTHESIS 2) | chr4:17391016-17393218 REVERSECBS CBS_pair_16 CBS_pair_BON_assoc CBS_pair_15 CBS_pair_23 CBS_pair_21 CBS_pair protein|CBS domain containing membrane protein, putative, expressed	-3.6314
17.7.1	hormone metabolism.jasmonate.synthesis-degradation	loc_os08g22149.1	Transcript	moderately similar to ( 261) AT4G36910 | Symbols: LEJ2, CDCP2 | LEJ2 (LOSS OF THE TIMING OF ET AND JA BIOSYNTHESIS 2) | chr4:17391016-17393218 REVERSECBS_pair_23 CBS CBS_pair_16 CBS_pair_BON_assoc CBS_pair_15 CBS_pair CBS_pair_21 protein|CBS domain containing membrane protein, putative, expressed	-1.71618
17.7.1.2	hormone metabolism.jasmonate.synthesis-degradation.lipoxygenase	loc_os08g39840.1	Transcript	highly similar to ( 845) AT3G45140 | Symbols: LOX2, ATLOX2 | LOX2 (LIPOXYGENASE 2); lipoxygenase | chr3:16525437-16529233 FORWARDnearly identical (1623) LOXC1_ORYSA Lipoxygenase 7, chloroplast precursor (EC 1.13.11.12) - Oryza sativa (Rice)Lipoxygenase PLAT_LH2 LH2 protein|lipoxygenase, chloroplast precursor, putative, expressed	1.38771
17.7.1.2	hormone metabolism.jasmonate.synthesis-degradation.lipoxygenase	loc_os02g10120.1	Transcript	highly similar to ( 916) AT3G45140 | Symbols: LOX2, ATLOX2 | LOX2 (LIPOXYGENASE 2); lipoxygenase | chr3:16525437-16529233 FORWARDnearly identical (1302) LOX23_HORVU Lipoxygenase 2.3, chloroplast precursor (EC 1.13.11.12) (LOX2:Hv:3) - Hordeum vulgare (Barley)Lipoxygenase PLAT_LH2 LH2 protein|lipoxygenase, putative, expressed	-5.01662
17.7.1.2	hormone metabolism.jasmonate.synthesis-degradation.lipoxygenase	loc_os12g37260.1	Transcript	highly similar to ( 749) AT3G45140 | Symbols: LOX2, ATLOX2 | LOX2 (LIPOXYGENASE 2); lipoxygenase | chr3:16525437-16529233 FORWARDhighly similar to ( 961) LOX21_HORVU Lipoxygenase 2.1, chloroplast precursor (EC 1.13.11.12) (LOX-100) (LOX2:Hv:1) - Hordeum vulgare (Barley)Lipoxygenase PLAT_LH2 protein|lipoxygenase 2.1, chloroplast precursor, putative, expressed	1.61378
17.7.1.2	hormone metabolism.jasmonate.synthesis-degradation.lipoxygenase	loc_os05g23880.1	Transcript	highly similar to ( 733) AT3G22400 | Symbols: LOX5 | LOX5; electron carrier/ iron ion binding / lipoxygenase/ metal ion binding / oxidoreductase, acting on single donors with incorporation of molecular oxygen, incorporation of two atoms of oxygen | chr3:7927011-7931167 FORWARDhighly similar to ( 719) LOX1_SOLTU Lipoxygenase 1 (EC 1.13.11.12) - Solanum tuberosum (Potato)Lipoxygenase PLAT_LH2 prote…	-2.23752
17.7.1.2	hormone metabolism.jasmonate.synthesis-degradation.lipoxygenase	loc_os05g28770.1	Transcript	weakly similar to ( 111) LOX5_ORYSA Putative lipoxygenase 5 (EC 1.13.11.12) - Oryza sativa (Rice) protein|GCRP9 - Glycine and cysteine rich family protein precursor, expressed	4.35707
17.7.1.3	hormone metabolism.jasmonate.synthesis-degradation.allene oxidase synthase	loc_os03g55800.1	Transcript	highly similar to ( 513) AT5G42650 | Symbols: AOS, CYP74A, DDE2 | AOS (ALLENE OXIDE SYNTHASE); allene oxide synthase/ hydro-lyase/ oxygen binding | chr5:17097803-17099359 REVERSEhighly similar to ( 891) C74A1_ORYSA Cytochrome P450 74A1, chloroplast precursor (EC 4.2.1.92) (Allene oxide synthase 1) (Hydroperoxide dehydrase 1) - Oryza sativa (Rice) protein|cytochrome P450, putative, expressed	-2.32565
17.7.1.4	hormone metabolism.jasmonate.synthesis-degradation.allene oxidase cyclase	loc_os03g32314.1	Transcript	moderately similar to ( 243) AT3G25780 | Symbols: AOC3 | AOC3 (ALLENE OXIDE CYCLASE 3); allene-oxide cyclase | chr3:9409362-9410409 FORWARDAllene_ox_cyc protein|allene oxide cyclase 4, chloroplast precursor, putative, expressed	-1.8596
17.7.1.5	hormone metabolism.jasmonate.synthesis-degradation.12-Oxo-PDA-reductase	loc_os06g11200.1	Transcript	highly similar to ( 510) AT1G76680 | Symbols: OPR1, ATOPR1 | OPR1; 12-oxophytodienoate reductase | chr1:28776982-28778271 FORWARD OYE_like_FMN PRK10605 NemA Oxidored_FMN OYE_like_FMN_family OYE_YqiM_FMN OYE_like_4_FMN OYE_like_5_FMN OYE_like_3_FMN OYE_like_2_FMN DCR_FMN PRK08255 ER_like_FMN TMADH_HD_FMN protein|12-oxophytodienoate reductase, putative, expressed	-3.90737
17.7.1.5	hormone metabolism.jasmonate.synthesis-degradation.12-Oxo-PDA-reductase	loc_os06g11240.1	Transcript	highly similar to ( 508) AT1G76690 | Symbols: OPR2, ATOPR2 | OPR2 | chr1:28778976-28780355 FORWARD OYE_like_FMN PRK10605 NemA Oxidored_FMN OYE_like_FMN_family OYE_YqiM_FMN OYE_like_5_FMN OYE_like_4_FMN OYE_like_3_FMN DCR_FMN PRK08255 OYE_like_2_FMN TMADH_HD_FMN ER_like_FMN protein|12-oxophytodienoate reductase, putative, expressed	-4.35215
17.7.1.5	hormone metabolism.jasmonate.synthesis-degradation.12-Oxo-PDA-reductase	loc_os06g11290.1	Transcript	moderately similar to ( 494) AT1G76680 | Symbols: OPR1, ATOPR1 | OPR1; 12-oxophytodienoate reductase | chr1:28776982-28778271 FORWARD OYE_like_FMN PRK10605 NemA Oxidored_FMN OYE_like_FMN_family OYE_YqiM_FMN OYE_like_4_FMN OYE_like_5_FMN OYE_like_3_FMN OYE_like_2_FMN PRK08255 DCR_FMN ER_like_FMN TMADH_HD_FMN protein|12-oxophytodienoate reductase, putative, expressed	-6.90737
17.7.2	hormone metabolism.jasmonate.signal transduction	loc_os07g42370.1	Transcript	very weakly similar to (99.0) AT1G19180 | Symbols: TIFY10A | JAZ1 (JASMONATE-ZIM-DOMAIN PROTEIN 1); protein binding | chr1:6622708-6623271 FORWARD protein|zinc-finger protein, putative, expressed	-2.93908
17.7.2	hormone metabolism.jasmonate.signal transduction	loc_os03g28940.1	Transcript	very weakly similar to (93.6) AT1G74950 | Symbols: JAZ2, TIFY10B | TIFY10B | chr1:28148919-28150258 REVERSE protein|ZIM domain containing protein, putative, expressed	-5.17954
17.7.3	hormone metabolism.jasmonate.induced-regulated-responsive-activated	loc_os07g33100.1	Transcript	highly similar to ( 959) AT4G04670 | Symbols: | Met-10+ like family protein / kelch repeat-containing protein | chr4:2367603-2371990 FORWARD COG2520 COG1590 Met_10 TYW3 PRK04235 protein|uncharacterized ACR, COG1590 family protein, expressed	2.97352
17.8.1	hormone metabolism.salicylic acid.synthesis-degradation	loc_os01g36600.1	Transcript	moderately similar to ( 251) AT4G38150 | Symbols: | pentatricopeptide (PPR) repeat-containing protein | chr4:17901211-17902119 REVERSEvery weakly similar to (92.0) RF1_ORYSA Rf1 protein, mitochondrial precursor (PPR protein) (Fertility restorer) (Restorer for CMS) - Oryza sativa (Rice) protein|PPR repeat domain containing protein, putative, expressed	4.22191
17.8.1	hormone metabolism.salicylic acid.synthesis-degradation	loc_os10g34370.1	Transcript	very weakly similar to (91.7) AT5G16420 | Symbols: | pentatricopeptide (PPR) repeat-containing protein | chr5:5368034-5369641 FORWARDvery weakly similar to (84.0) RF1_ORYSA Rf1 protein, mitochondrial precursor (PPR protein) (Fertility restorer) (Restorer for CMS) - Oryza sativa (Rice) protein|expressed protein	4.01871
17.8.1	hormone metabolism.salicylic acid.synthesis-degradation	loc_os11g15040.5	Transcript	weakly similar to ( 123) AT5G66430 | Symbols: | S-adenosyl-L-methionine:carboxyl methyltransferase family protein | chr5:26525410-26526799 REVERSEweakly similar to ( 112) BAMT_ANTMA Benzoate carboxyl methyltransferase (EC 2.1.1.-) (S-adenosyl-L-methionine:benzoic acid carboxyl methyltransferase) - Antirrhinum majus (Garden snapdragon)Methyltransf_7 protein|S-adenosyl-L-methionine:benzoic acid/sal…	4.99952
17.8.1	hormone metabolism.salicylic acid.synthesis-degradation	loc_os05g01140.1	Transcript	weakly similar to ( 169) AT5G38020 | Symbols: | S-adenosyl-L-methionine:carboxyl methyltransferase family protein | chr5:15165953-15167612 REVERSEweakly similar to ( 155) BAMT_ANTMA Benzoate carboxyl methyltransferase (EC 2.1.1.-) (S-adenosyl-L-methionine:benzoic acid carboxyl methyltransferase) - Antirrhinum majus (Garden snapdragon)Methyltransf_7 protein|methyltransferase, putative, expressed	-9.58901
18	Co-factor and vitamine metabolism	loc_os04g56620.1	Transcript	highly similar to ( 558) AT5G20990 | Symbols: B73, SIR4, CNX, CHL6, CNX1 | B73; molybdenum ion binding | chr5:7128737-7133397 REVERSE MoeA MogA_MoaB MoeA MoaB mogA moaC MoCF_BD PRK10680 MoCF_biosynth protein|molybdopterin biosynthesis protein CNX1, putative, expressed	3.04391
18	Co-factor and vitamine metabolism	loc_os04g57500.1	Transcript	moderately similar to ( 265) AT5G04490 | Symbols: VTE5 | VTE5 (vitamin E pathway gene5); phosphatidate cytidylyltransferase/ phytol kinase | chr5:1279867-1281587 FORWARDmoderately similar to ( 422) PHYK1_ORYSA Probable phytol kinase 1, chloroplast precursor (EC 2.7.-.-) - Oryza sativa (Rice) protein|phosphatidate cytidylyltransferase, putative, expressed	1.28543
18	Co-factor and vitamine metabolism	loc_os12g40450.1	Transcript	moderately similar to ( 325) AT4G31050 | Symbols: | lipoyltransferase (LIP2p) | chr4:15114345-15115443 FORWARD LipB lipB protein|biotin--protein ligase, putative, expressed	2.13197
18	Co-factor and vitamine metabolism	loc_os03g20560.1	Transcript	moderately similar to ( 327) AT1G04640 | Symbols: LIP2 | LIP2 (LIPOYLTRANSFERASE 2); lipoyltransferase | chr1:1292541-1293248 FORWARD lipB LipB protein|biotin--protein ligase, putative, expressed	1.92797
18	Co-factor and vitamine metabolism	loc_os02g04740.1	Transcript	weakly similar to ( 168) AT2G43760 | Symbols: | molybdopterin biosynthesis MoaE family protein | chr2:18133276-18133872 FORWARD MoaE MoaE MoaE PRK10678 protein|molybdenum cofactor synthesis protein 2 large subunit, putative, expressed	3.9653
18	Co-factor and vitamine metabolism	loc_os07g01020.1	Transcript	moderately similar to ( 476) AT5G01410 | Symbols: PDX1, ATPDX1.3, RSR4, PDX1.3, ATPDX1 | RSR4 (REDUCED SUGAR RESPONSE 4); protein heterodimerization/ protein homodimerization | chr5:172576-173505 REVERSEmoderately similar to ( 479) PDX1_HEVBR Probable pyridoxin biosynthesis protein ER1 (PDX1 homolog) (Ethylene-inducible protein HEVER) - Hevea brasiliensis (Para rubber tree) PRK04180 pdxS SNZ1 SOR…	-1.82264
18	Co-factor and vitamine metabolism	loc_os10g01080.1	Transcript	moderately similar to ( 469) AT5G01410 | Symbols: PDX1, ATPDX1.3, RSR4, PDX1.3, ATPDX1 | RSR4 (REDUCED SUGAR RESPONSE 4); protein heterodimerization/ protein homodimerization | chr5:172576-173505 REVERSEmoderately similar to ( 474) PDX1_HEVBR Probable pyridoxin biosynthesis protein ER1 (PDX1 homolog) (Ethylene-inducible protein HEVER) - Hevea brasiliensis (Para rubber tree) PRK04180 pdxS SNZ1 SOR…	-3.82567
18.1	Co-factor and vitamine metabolism.molybdenum cofactor	loc_os02g56050.1	Transcript	weakly similar to ( 149) AT5G55130 | Symbols: CNX5, SIR1 | CNX5 (CO-FACTOR FOR NITRATE, REDUCTASE AND XANTHINE DEHYDROGENASE 5); Mo-molybdopterin cofactor sulfurase | chr5:22373374-22376028 REVERSE RHOD_ThiF protein|rhodanese-like domain containing protein, putative, expressed	1.66249
18.2	Co-factor and vitamine metabolism.thiamine	loc_os01g11880.1	Transcript	moderately similar to ( 441) AT1G53280 | Symbols: | DJ-1 family protein | chr1:19864942-19867341 REVERSE GATase1_DJ-1 PRK11574 ThiJ DJ-1_PfpI GATase1_PfpI_like GATase1_PfpI_2 protein|DJ-1 family protein, putative, expressed	2.24745
18.2	Co-factor and vitamine metabolism.thiamine	loc_os07g34570.1	Transcript	moderately similar to ( 486) AT5G54770 | Symbols: THI1, TZ, THI4 | THI1; protein homodimerization | chr5:22246634-22247891 FORWARDhighly similar to ( 519) THI41_MAIZE Thiazole biosynthetic enzyme 1-1, chloroplast precursor - Zea mays (Maize) Thi4 THI4 PRK04176 protein|FAD dependent oxidoreductase domain containing protein, expressed	11.9602
18.2.1	Co-factor and vitamine metabolism.thiamine.thiamine diphosphokinase	loc_os01g70580.1	Transcript	moderately similar to ( 334) AT1G02880 | Symbols: TPK1 | TPK1 (THIAMIN PYROPHOSPHOKINASE1); thiamin diphosphokinase | chr1:643063-643921 REVERSE TPK_catalytic THI80 protein|thiamin pyrophosphokinase 1, putative, expressed	3.45018
18.3	Co-factor and vitamine metabolism.riboflavin	loc_os01g55310.1	Transcript	moderately similar to ( 258) AT4G21470 | Symbols: ATFMN/FHY | ATFMN/FHY (riboflavin kinase/FMN hydrolase); FMN adenylyltransferase/ riboflavin kinase | chr4:11431284-11433197 FORWARD COG0637 Gph Hydrolase PRK10826 PRK10725 COG1011 protein|haloacid dehalogenase-like hydrolase domain-containing protein 1A, putative, expressed	-2.00048
18.3.1	Co-factor and vitamine metabolism.riboflavin.GTP cyclohydrolase II	loc_os02g36340.1	Transcript	highly similar to ( 696) AT5G64300 | Symbols: ATGCH, GCH, ATRIBA1, RFD1 | ATGCH; 3,4-dihydroxy-2-butanone-4-phosphate synthase/ GTP cyclohydrolase II | chr5:25718459-25720790 FORWARD PRK09311 PRK09319 GTP_cyclohydro2 PRK09318 RibB PRK12485 PRK09314 DHBP_synthase GTP_cyclohydro2 RibA ribA ribB ribB ribB ribB PRK08815 PRK05773 protein|riboflavin biosynthesis protein ribAB, chloroplast precursor, pu…	-4.36096
18.4.2	Co-factor and vitamine metabolism.pantothenate.3-methyl-2-oxobutanoate hydroxymethyltransferase (KPHMT,PANB)	loc_os01g12560.1	Transcript	moderately similar to ( 493) AT2G46110 | Symbols: PANB1, KPHMT1 | KPHMT1 (KETOPANTOATE HYDROXYMETHYLTRANSFERASE 1); 3-methyl-2-oxobutanoate hydroxymethyltransferase | chr2:18954807-18956411 REVERSE panB PanB Pantoate_transf protein|3-methyl-2-oxobutanoate hydroxymethyltransferase, putative, expressed	3.27827
18.4.5	Co-factor and vitamine metabolism.pantothenate.pantothenate kinase (PANK)	loc_os06g21980.1	Transcript	highly similar to ( 566) AT4G35360 | Symbols: | pantothenate kinase family protein | chr4:16812303-16814656 REVERSE protein|pantothenate kinase 4, putative, expressed	1.42402
18.4.5	Co-factor and vitamine metabolism.pantothenate.pantothenate kinase (PANK)	loc_os06g10520.1	Transcript	moderately similar to ( 346) AT4G32180 | Symbols: ATPANK2 | ATPANK2 (PANTOTHENATE KINASE 2); pantothenate kinase | chr4:15538340-15543715 REVERSE Fumble PanK protein|pantothenate kinase, putative, expressed	1.75186
18.5	Co-factor and vitamine metabolism.folate & vitamine K	loc_os09g36800.1	Transcript	highly similar to ( 616) AT5G66120 | Symbols: | 3-dehydroquinate synthase, putative | chr5:26431516-26433649 REVERSE aroB AroB DHQ_synthase aroB protein|3-dehydroquinate synthase, putative, expressed	-3.94084
18.6.1	Co-factor and vitamine metabolism.biotin.biotin synthase	loc_os08g42730.1	Transcript	highly similar to ( 579) AT2G43360 | Symbols: BIO2, BIOB | BIO2 (BIOTIN AUXOTROPH 2); biotin synthase | chr2:18010918-18013129 REVERSE BioB PRK06256 PRK08508 Elp3 BATS Radical_SAM protein|radical SAM enzyme, putative, expressed	1.51536
18.7	Co-factor and vitamine metabolism.iron-sulphur clusters	loc_os04g35480.1	Transcript	highly similar to ( 768) AT1G72090 | Symbols: | radical SAM domain-containing protein / TRAM domain-containing protein | chr1:27123617-27126767 FORWARDweakly similar to ( 115) CK5P1_ORYSA CDK5RAP1-like protein - Oryza sativa (Rice) MiaB Elp3 COG1032 UPF0004 protein|CDK5RAP1, putative, expressed	2.28245
18.8.1	Co-factor and vitamine metabolism.ubiquinone.hexaprenyldihydroxybenzoate methyltransferase	loc_os06g05900.1	Transcript	moderately similar to ( 393) AT2G30920 | Symbols: ATCOQ3, EMB3002, COQ3 | ATCOQ3 (ARABDIOPSIS THALIANA COENZYME Q 3); hexaprenyldihydroxybenzoate methyltransferase/ polyprenyldihydroxybenzoate methyltransferase | chr2:13157409-13159824 REVERSE PRK05134 UbiG protein|methyltransferase, putative, expressed	1.4115
18.11	Co-factor and vitamine metabolism.lipoic acid	loc_os04g38330.1	Transcript	highly similar to ( 533) AT2G20860 | Symbols: LIP1 | LIP1 (LIPOIC ACID SYNTHASE 1); lipoic acid synthase | chr2:8979636-8980983 FORWARD PRK05481 LipA PRK12928 protein|radical SAM enzyme, putative, expressed	1.0815
19.2	tetrapyrrole synthesis.glu-tRNA reductase	loc_os10g35840.1	Transcript	highly similar to ( 605) AT1G58290 | Symbols: HEMA1 | HEMA1; glutamyl-tRNA reductase | chr1:21624028-21626051 REVERSEhighly similar to ( 790) HEM1_ORYSA Glutamyl-tRNA reductase, chloroplast precursor (EC 1.2.1.70) (GluTR) - Oryza sativa (Rice)hemA HemA GlutR_N Shikimate_DH GlutR_dimer hemA protein|shikimate/quinate 5-dehydrogenase, putative, expressed	-1.97544
19.3	tetrapyrrole synthesis.GSA	loc_os07g27780.1	Transcript	moderately similar to ( 372) AT1G80600 | Symbols: WIN1 | WIN1 (HOPW1-1-INTERACTING 1); N2-acetyl-L-ornithine:2-oxoglutarate 5-aminotransferase/ catalytic/ pyridoxal phosphate binding / transaminase | chr1:30298675-30300513 REVERSEvery weakly similar to (94.7) GSA_BRANA Glutamate-1-semialdehyde 2,1-aminomutase, chloroplast precursor (EC 5.4.3.8) (GSA) (Glutamate-1-semialdehyde aminotransferase) (G…	2.71001
19.7	tetrapyrrole synthesis.uroporphyrinogen decarboxylase	loc_os03g21900.1	Transcript	highly similar to ( 600) AT2G40490 | Symbols: HEME2 | HEME2; uroporphyrinogen decarboxylase | chr2:16912961-16914988 FORWARDhighly similar to ( 659) DCUP_MAIZE Uroporphyrinogen decarboxylase, chloroplast precursor (EC 4.1.1.37) (URO-D) (UPD) - Zea mays (Maize) hemE URO-D URO-D HemE URO-D_like Mta_CmuA_like URO-D_CIMS_like PRK06252 protein|uroporphyrinogen decarboxylase, putative, expressed	-1.70092
19.8	tetrapyrrole synthesis.coproporphyrinogen III oxidase	loc_os04g52130.1	Transcript	highly similar to ( 551) AT1G03475 | Symbols: LIN2, HEMF1, ATCPO-I | LIN2 (LESION INITIATION 2); coproporphyrinogen oxidase | chr1:869302-871175 REVERSEhighly similar to ( 592) HEM6_HORVU Coproporphyrinogen III oxidase, chloroplast precursor (EC 1.3.3.3) (Coproporphyrinogenase) (Coprogen oxidase) - Hordeum vulgare (Barley) Coprogen_oxidas PRK05330 HemF protein|coproporphyrinogen III oxidase, chlo…	1.41187
19.9	tetrapyrrole synthesis.protoporphyrin IX oxidase	loc_os04g41260.1	Transcript	highly similar to ( 525) AT5G14220 | Symbols: HEMG2, MEE61, PPO2 | HEMG2; electron carrier/ oxidoreductase/ protoporphyrinogen oxidase | chr5:4583506-4587369 REVERSEhighly similar to ( 523) PPOM_TOBAC Protoporphyrinogen oxidase, mitochondrial (EC 1.3.3.4) (PPO II) (Protoporphyrinogen IX oxidase isozyme II) (PPX II) (PX-2) - Nicotiana tabacum (Common tobacco) HemY PRK11883 Amino_oxidase PRK07233 P…	1.80688
19.9	tetrapyrrole synthesis.protoporphyrin IX oxidase	loc_os01g18320.1	Transcript	highly similar to ( 679) AT4G01690 | Symbols: PPOX, HEMG1, PPO1 | PPOX; protoporphyrinogen oxidase | chr4:729929-732309 FORWARDhighly similar to ( 679) PPOC_TOBAC Protoporphyrinogen oxidase, chloroplast precursor (EC 1.3.3.4) (PPO I) (Protoporphyrinogen IX oxidase isozyme I) (PPX I) - Nicotiana tabacum (Common tobacco) HemY PRK11883 Amino_oxidase PRK12416 PRK07233 protein|protoporphyrinogen oxida…	-4.64434
19.10	tetrapyrrole synthesis.magnesium chelatase	loc_os03g20700.1	Transcript	nearly identical (2254) AT5G13630 | Symbols: GUN5, CCH, CHLH, CCH1 | GUN5 (GENOMES UNCOUPLED 5); magnesium chelatase | chr5:4387920-4392082 REVERSEPRK12493 CobN-Mg_chel CobN cobN cobN protein|magnesium-chelatase, putative, expressed	-4.20211
19.10	tetrapyrrole synthesis.magnesium chelatase	loc_os03g59640.1	Transcript	highly similar to ( 983) AT1G08520 | Symbols: PDE166, CHLD | CHLD; ATP binding / magnesium chelatase/ nucleoside-triphosphatase/ nucleotide binding | chr1:2696538-2700819 FORWARDnearly identical (1009) CHLD_TOBAC Magnesium-chelatase subunit chlD, chloroplast precursor (EC 6.6.1.1) (Mg-protoporphyrin IX chelatase) (Mg-chelatase subunit D) - Nicotiana tabacum (Common tobacco)ChlI chlI vWA_Magnesium…	-1.23625
19.10	tetrapyrrole synthesis.magnesium chelatase	loc_os03g36540.1	Transcript	highly similar to ( 545) AT5G45930 | Symbols: CHLI2, CHL I2, CHLI-2 | CHLI2 (MAGNESIUM CHELATASE I2); ATPase/ magnesium chelatase | chr5:18628095-18629565 FORWARDhighly similar to ( 563) CHLI_SOYBN Magnesium-chelatase subunit chlI, chloroplast precursor (EC 6.6.1.1) (Mg-protoporphyrin IX chelatase) - Glycine max (Soybean)chlI ChlI protein|magnesium-chelatase subunit chlI, chloroplast precursor, p…	-3.08021
19.11	tetrapyrrole synthesis.magnesium protoporphyrin IX methyltransferase	loc_os06g04150.1	Transcript	moderately similar to ( 300) AT4G25080 | Symbols: CHLM | CHLM (magnesium-protoporphyrin IX methyltransferase); magnesium protoporphyrin IX methyltransferase | chr4:12877216-12878128 FORWARD PRK07580 Mg-por_mtran_C UbiG protein|magnesium-protoporphyrin O-methyltransferase, putative, expressed	-5.22007
19.12	tetrapyrrole synthesis.magnesium-protoporphyrin IX monomethyl ester (oxidative) cyclase	loc_os01g17170.1	Transcript	highly similar to ( 630) AT3G56940 | Symbols: CRD1, CHL27, ACSF | CRD1 (COPPER RESPONSE DEFECT 1); DNA binding / magnesium-protoporphyrin IX monomethyl ester (oxidative) cyclase | chr3:21076594-21078269 FORWARDhighly similar to ( 675) CRD1_HORVU Magnesium-protoporphyrin IX monomethyl ester [oxidative] cyclase, chloroplast precursor (EC 1.14.13.81) (Mg-protoporphyrin IX monomethyl ester oxidative …	-5.89426
19.13	tetrapyrrole synthesis.divinyl chlorophyllide-a 8-vinyl-reductase	loc_os03g22780.1	Transcript	moderately similar to ( 480) AT5G18660 | Symbols: PCB2 | PCB2 (PALE-GREEN AND CHLOROPHYLL B REDUCED 2); 3,8-divinyl protochlorophyllide a 8-vinyl reductase | chr5:6220872-6222125 REVERSE WcaG protein|DVR, putative, expressed	-2.8132
19.20	tetrapyrrole synthesis.ferrochelatase	loc_os05g29760.5	Transcript	highly similar to ( 539) AT2G30390 | Symbols: FC2, FC-II, ATFC-II | FC2 (FERROCHELATASE 2); ferrochelatase | chr2:12951242-12953985 REVERSEhighly similar to ( 615) HEMH_ORYSA Ferrochelatase-2, chloroplast precursor (EC 4.99.1.1) (Ferrochelatase II) (Protoheme ferro-lyase 2) (Heme synthetase 2) - Oryza sativa (Rice) Ferrochelatase hemH HemH Ferrochelatase_C PRK12435 Ferrochelatase_N protein|ferroc…	2.45203
19.21	tetrapyrrole synthesis.heme oxygenase	loc_os03g27770.1	Transcript	moderately similar to ( 211) AT2G26550 | Symbols: HO2 | HO2 (HEME OXYGENASE 2); heme oxygenase (decyclizing) | chr2:11291584-11293426 REVERSE HemeO protein|heme oxygenase 2, putative, expressed	1.23169
19.21	tetrapyrrole synthesis.heme oxygenase	loc_os06g40080.1	Transcript	moderately similar to ( 311) AT2G26670 | Symbols: ATHO1, HO1, TED4, GUN2, HY6 | TED4 (REVERSAL OF THE DET PHENOTYPE 4); heme oxygenase (decyclizing) | chr2:11341816-11343394 FORWARD HemeO protein|heme oxygenase 1, putative, expressed	-2.06783
19.30	tetrapyrrole synthesis.uroporphyrin-III C-methyltransferase	loc_os01g44050.1	Transcript	moderately similar to ( 406) AT5G40850 | Symbols: UPM1 | UPM1 (UROPHORPHYRIN METHYLASE 1); uroporphyrin-III C-methyltransferase | chr5:16367205-16368724 FORWARD PRK06136 CysG cysG PRK07168 TP_methylase CobM CobF CobJ protein|siroheme synthase, putative, expressed	-6.24603
19.40	tetrapyrrole synthesis.regulation	loc_os11g16550.1	Transcript	moderately similar to ( 209) AT3G59400 | Symbols: GUN4 | GUN4; enzyme binding / tetrapyrrole binding | chr3:21948881-21949678 REVERSEGUN4 protein|uncharacterized protein ycf53, putative, expressed	-5.40579
19.40	tetrapyrrole synthesis.regulation	loc_os02g37470.1	Transcript	moderately similar to ( 233) AT3G14110 | Symbols: FLU | FLU (FLUORESCENT IN BLUE LIGHT); binding | chr3:4676222-4677602 REVERSE protein|tetratricopeptide repeat containing protein, putative, expressed	3.16945
19.99	tetrapyrrole synthesis.unspecified	loc_os01g13420.1	Transcript	weakly similar to ( 144) AT1G17100 | Symbols: | SOUL heme-binding family protein | chr1:5844766-5845539 FORWARDSOUL protein|SOUL heme-binding protein, putative, expressed	3.557
19.99	tetrapyrrole synthesis.unspecified	loc_os01g53250.1	Transcript	highly similar to ( 801) AT3G02280 | Symbols: | flavodoxin family protein | chr3:453646-457659 FORWARDmoderately similar to ( 249) NCPR_PHAAU NADPH--cytochrome P450 reductase (EC 1.6.2.4) (CPR) (P450R) - Phaseolus aureus (Mung bean) (Vigna radiata) CysJ cysJ PRK06214 FAD_binding_1 Flavodoxin_1 protein|NADPH reductase, putative, expressed	1.70933
19.99	tetrapyrrole synthesis.unspecified	loc_os01g34390.1	Transcript	moderately similar to ( 412) AT2G44520 | Symbols: COX10 | COX10 (cytochrome c oxidase 10); prenyltransferase/ protoheme IX farnesyltransferase | chr2:18379660-18381731 FORWARD CyoE PRK04375 UbiA ubiA protein|prenyltransferase, putative, expressed	1.72355
20	stress	loc_os04g54630.1	Transcript	weakly similar to ( 139) AT2G21970 | Symbols: SEP2 | SEP2 (STRESS ENHANCED PROTEIN 2); chlorophyll binding | chr2:9357188-9357874 REVERSE protein|expressed protein	1.22659
20	stress	loc_os12g41190.1	Transcript	moderately similar to ( 444) AT1G04190 | Symbols: | tetratricopeptide repeat (TPR)-containing protein | chr1:1106617-1108557 REVERSEvery weakly similar to (85.9) STIP_SOYBN Heat shock protein STI (Stress-inducible protein) (GmSTI) - Glycine max (Soybean) TPR protein|tetratricopeptide repeat domain containing protein, expressed	2.42903
20.1	stress.biotic	loc_os11g47560.1	Transcript	weakly similar to ( 169) AT5G24090 | Symbols: | acidic endochitinase (CHIB1) | chr5:8143805-8145153 REVERSEmoderately similar to ( 386) XIP2_ORYSA Xylanase inhibitor protein 2 precursor (Class III chitinase homolog h) - Oryza sativa (Rice) protein|glycosyl hydrolase, putative, expressed	12.6411
20.1	stress.biotic	loc_os06g51060.1	Transcript	moderately similar to ( 394) AT3G12500 | Symbols: ATHCHIB, PR3, PR-3, CHI-B, B-CHI | ATHCHIB (ARABIDOPSIS THALIANA BASIC CHITINASE); chitinase | chr3:3962501-3963945 REVERSEmoderately similar to ( 469) CHI1_ORYSA Basic endochitinase 1 precursor (EC 3.2.1.14) - Oryza sativa (Rice) Glyco_hydro_19 chitinase_glyco_hydro_19 protein|CHIT8 - Chitinase family protein precursor, expressed	4.13306
20.1	stress.biotic	loc_os11g11550.1	Transcript	weakly similar to ( 150) AT3G07040 | Symbols: RPM1, RPS3 | RPM1 (RESISTANCE TO P. SYRINGAE PV MACULICOLA 1); nucleotide binding / protein binding | chr3:2226244-2229024 REVERSE NB-ARC protein|NBS-LRR disease resistance protein, putative, expressed	4.84082
20.1	stress.biotic	loc_os05g51660.1	Transcript	very weakly similar to ( 100) AT1G01310 | Symbols: | allergen V5/Tpx-1-related family protein | chr1:120221-120946 FORWARDvery weakly similar to (96.7) PR1B_TOBAC Pathogenesis-related protein 1B precursor (PR-1B) - Nicotiana tabacum (Common tobacco) SCP SCP SCP protein|SCP-like extracellular protein, expressed	1.62755
20.1	stress.biotic	loc_os01g42870.1	Transcript	moderately similar to ( 213) AT3G62160 | Symbols: | transferase family protein | chr3:23014333-23015808 REVERSEvery weakly similar to (96.7) HCBT2_DIACA Anthranilate N-benzoyltransferase protein 2 (EC 2.3.1.144) (Anthranilate N-hydroxycinnamoyl/benzoyltransferase 2) - Dianthus caryophyllus (Carnation) (Clove pink)Transferase protein|transferase family protein, putative, expressed	2.83077
20.1	stress.biotic	loc_os12g43380.1	Transcript	weakly similar to ( 132) AT4G11650 | Symbols: ATOSM34 | ATOSM34 (osmotin 34) | chr4:7025127-7026113 REVERSEmoderately similar to ( 260) TLP_ORYSA Thaumatin-like protein precursor - Oryza sativa (Rice)Thaumatin THN protein|thaumatin, putative, expressed	2.86961
20.1	stress.biotic	loc_os06g48560.1	Transcript	weakly similar to ( 113) AT3G62160 | Symbols: | transferase family protein | chr3:23014333-23015808 REVERSETransferase protein|transferase family protein, putative, expressed	-3.13798
20.1	stress.biotic	loc_os11g47500.1	Transcript	weakly similar to ( 173) AT5G24090 | Symbols: | acidic endochitinase (CHIB1) | chr5:8143805-8145153 REVERSEmoderately similar to ( 363) XIP1_ORYSA Xylanase inhibitor protein 1 precursor (Class III chitinase homolog a) (RIXI protein) - Oryza sativa (Rice) protein|glycosyl hydrolase, putative, expressed	6.65296
20.1	stress.biotic	loc_os01g18400.1	Transcript	moderately similar to ( 351) AT1G02360 | Symbols: | chitinase, putative | chr1:472138-473116 REVERSEmoderately similar to ( 280) CHI2_BRANA Endochitinase CH25 precursor (EC 3.2.1.14) - Brassica napus (Rape) chitinase_glyco_hydro_19 Glyco_hydro_19 protein|CHIT10 - Chitinase family protein precursor, expressed	1.13702
20.1	stress.biotic	loc_os12g32590.1	Transcript	weakly similar to ( 142) AT3G07040 | Symbols: RPM1, RPS3 | RPM1 (RESISTANCE TO P. SYRINGAE PV MACULICOLA 1); nucleotide binding / protein binding | chr3:2226244-2229024 REVERSE NB-ARC protein|NB-ARC domain containing protein, expressed	3.115
20.1	stress.biotic	loc_os02g53070.1	Transcript	moderately similar to ( 267) AT5G64930 | Symbols: CPR5, HYS1 | CPR5 (CONSTITUTIVE EXPRESSION OF PR GENES 5) | chr5:25945885-25948321 REVERSE protein|HYS1, putative, expressed	1.77713
20.1	stress.biotic	loc_os11g47600.1	Transcript	weakly similar to ( 154) AT5G24090 | Symbols: | acidic endochitinase (CHIB1) | chr5:8143805-8145153 REVERSEmoderately similar to ( 274) XIP1_ORYSA Xylanase inhibitor protein 1 precursor (Class III chitinase homolog a) (RIXI protein) - Oryza sativa (Rice) protein|glycosyl hydrolase, putative, expressed	6.08167
20.1	stress.biotic	loc_os04g58860.1	Transcript	weakly similar to ( 165) AT3G44220 | Symbols: | harpin-induced family protein / HIN1 family protein / harpin-responsive family protein | chr3:15928216-15929645 FORWARDHin1 protein|harpin-induced protein 1 domain containing protein, expressed	1.23783
20.1	stress.biotic	loc_os02g03280.2	Transcript	moderately similar to ( 269) AT5G47120 | Symbols: ATBI-1, BI-1, ATBI1 | ATBI1 (BAX INHIBITOR 1) | chr5:19136071-19137585 FORWARDmoderately similar to ( 347) BI1_ORYSA Bax inhibitor 1 (BI-1) (OsBI-1) - Oryza sativa (Rice) UPF0005 protein|transmembrane BAX inhibitor motif-containing protein, putative, expressed	-3.93393
20.1	stress.biotic	loc_os08g40680.1	Transcript	weakly similar to ( 140) AT5G24090 | Symbols: | acidic endochitinase (CHIB1) | chr5:8143805-8145153 REVERSEmoderately similar to ( 384) XIP2_ORYSA Xylanase inhibitor protein 2 precursor (Class III chitinase homolog h) - Oryza sativa (Rice) protein|glycosyl hydrolase, putative, expressed	6.44246
20.1	stress.biotic	loc_os02g10580.1	Transcript	NB-ARC protein|NB-ARC domain containing disease resistance protein, putative, expressed	4.61423
20.1	stress.biotic	loc_os02g45870.1	Transcript	moderately similar to ( 331) AT2G02180 | Symbols: TOM3 | TOM3; protein binding | chr2:560976-562961 FORWARDDUF1084 protein|tobamovirus multiplication protein, putative, expressed	-1.24375
20.1	stress.biotic	loc_os08g40690.1	Transcript	weakly similar to ( 152) AT5G24090 | Symbols: | acidic endochitinase (CHIB1) | chr5:8143805-8145153 REVERSEmoderately similar to ( 357) XIP1_ORYSA Xylanase inhibitor protein 1 precursor (Class III chitinase homolog a) (RIXI protein) - Oryza sativa (Rice) protein|glycosyl hydrolase, putative, expressed	5.74905
20.1	stress.biotic	loc_os08g28790.1	Transcript	very weakly similar to (81.3) AT1G22900 | Symbols: | FUNCTIONS IN: molecular_function unknown; INVOLVED IN: defense response; LOCATED IN: endomembrane system; EXPRESSED IN: stamen; EXPRESSED DURING: 4 anthesis; CONTAINS InterPro DOMAIN/s: Plant disease resistance response protein (InterPro:IPR004265); BEST Arabidopsis thaliana protein match is: disease resistance-responsive family protein (TAIR:A…	-9.76714
20.1	stress.biotic	loc_os09g34130.1	Transcript	highly similar to ( 732) AT3G59660 | Symbols: | C2 domain-containing protein / GRAM domain-containing protein | chr3:22034426-22038484 REVERSE protein|GRAM domain containing protein, expressed	1.26394
20.1	stress.biotic	loc_os09g21210.1	Transcript	highly similar to ( 770) AT5G15870 | Symbols: | glycosyl hydrolase family 81 protein | chr5:5182641-5184878 REVERSE Glyco_hydro_81 ACF2 protein|beta-glucan-binding protein 4, putative, expressed	-3.3116
20.1	stress.biotic	loc_os07g03279.1	Transcript	weakly similar to ( 131) AT3G19690 | Symbols: | pathogenesis-related protein, putative | chr3:6842365-6842850 REVERSEweakly similar to ( 141) PRB1_TOBAC Basic form of pathogenesis-related protein 1 precursor (PRP 1) - Nicotiana tabacum (Common tobacco) SCP SCP SCP protein|SCP-like extracellular protein, expressed	12.2063
20.1	stress.biotic	loc_os11g37960.1	Transcript	weakly similar to ( 181) AT3G04720 | Symbols: PR4, HEL, PR-4 | PR4 (PATHOGENESIS-RELATED 4); chitin binding | chr3:1285691-1286531 REVERSEmoderately similar to ( 207) WHW2_WHEAT Wheatwin-2 precursor (Pathogenesis-related protein 4b) - Triticum aestivum (Wheat)Barwin protein|WIP4 - Wound-induced protein precursor, expressed	3.4628
20.1	stress.biotic	loc_os07g23470.1	Transcript	weakly similar to ( 192) AT5G38280 | Symbols: PR5K | PR5K; kinase/ transmembrane receptor protein serine/threonine kinase | chr5:15293325-15295838 REVERSEweakly similar to ( 181) TP1A_MALDO Thaumatin-like protein 1a precursor (Allergen Mal d 2) (Mdtl1) (Pathogenesis-related protein 5a) (PR-5a) - Malus domestica (Apple) (Malus sylvestris)THN Thaumatin protein|thaumatin, putative, expressed	-3.95468
20.1	stress.biotic	loc_os06g33180.2	Transcript	moderately similar to ( 423) AT1G64140 | Symbols: | FUNCTIONS IN: molecular_function unknown; INVOLVED IN: biological_process unknown; EXPRESSED IN: sperm cell, male gametophyte, pollen tube; EXPRESSED DURING: L mature pollen stage, M germinated pollen stage; BEST Arabidopsis thaliana protein match is: loricrin-related (TAIR:AT5G64550.1); Has 2298 Blast hits to 1429 proteins in 121 species: Archa…	-1.7332
20.1	stress.biotic	loc_os11g38520.1	Transcript	protein|expressed protein	2.02927
20.1	stress.biotic	loc_os10g22510.1	Transcript	very weakly similar to (91.3) AT3G46530 | Symbols: RPP13 | RPP13 (RECOGNITION OF PERONOSPORA PARASITICA 13); ATP binding | chr3:17130739-17133246 REVERSE NB-ARC protein|MLA1, putative, expressed	2.88216
20.1	stress.biotic	loc_os11g10770.1	Transcript	weakly similar to ( 144) AT3G14470 | Symbols: | disease resistance protein (NBS-LRR class), putative | chr3:4857940-4861104 FORWARD NB-ARC protein|disease resistance protein RGA3, putative, expressed	-4.83337
20.1	stress.biotic	loc_os03g46060.1	Transcript	weakly similar to ( 169) AT4G11650 | Symbols: ATOSM34 | ATOSM34 (osmotin 34) | chr4:7025127-7026113 REVERSEweakly similar to ( 182) P21_SOYBN Protein P21 - Glycine max (Soybean)Thaumatin THN protein|thaumatin family domain containing protein, expressed	4.39184
20.1	stress.biotic	loc_os05g15770.1	Transcript	weakly similar to ( 179) AT5G24090 | Symbols: | acidic endochitinase (CHIB1) | chr5:8143805-8145153 REVERSEmoderately similar to ( 333) XIP2_ORYSA Xylanase inhibitor protein 2 precursor (Class III chitinase homolog h) - Oryza sativa (Rice) protein|glycosyl hydrolase, putative, expressed	2.77352
20.1	stress.biotic	loc_os06g27830.1	Transcript	weakly similar to ( 172) AT5G64550 | Symbols: | loricrin-related | chr5:25801794-25803698 REVERSE protein|expressed protein	2.71066
20.1	stress.biotic	loc_os11g10120.1	Transcript	protein|expressed protein	2.06365
20.1	stress.biotic	loc_os09g32280.1	Transcript	moderately similar to ( 266) AT5G24620 | Symbols: | thaumatin-like protein, putative | chr5:8430918-8432289 FORWARDmoderately similar to ( 208) TP1A_MALDO Thaumatin-like protein 1a precursor (Allergen Mal d 2) (Mdtl1) (Pathogenesis-related protein 5a) (PR-5a) - Malus domestica (Apple) (Malus sylvestris)THN Thaumatin protein|thaumatin, putative, expressed	4.9768
20.1	stress.biotic	loc_os04g54830.1	Transcript	moderately similar to ( 466) AT5G64550 | Symbols: | loricrin-related | chr5:25801794-25803698 REVERSE protein|expressed protein	-3.03501
20.1	stress.biotic	loc_os12g28250.1	Transcript	weakly similar to ( 102) AT3G46530 | Symbols: RPP13 | RPP13 (RECOGNITION OF PERONOSPORA PARASITICA 13); ATP binding | chr3:17130739-17133246 REVERSE NB-ARC protein|disease resistance protein RPM1, putative, expressed	4.96761
20.1	stress.biotic	loc_os08g01220.1	Transcript	weakly similar to ( 158) AT3G11660 | Symbols: NHL1 | NHL1 | chr3:3679031-3679660 REVERSEHin1 protein|harpin-induced protein 1 domain containing protein, expressed	2.8795
20.1	stress.biotic	loc_os02g17304.1	Transcript	moderately similar to ( 257) AT3G46530 | Symbols: RPP13 | RPP13 (RECOGNITION OF PERONOSPORA PARASITICA 13); ATP binding | chr3:17130739-17133246 REVERSE NB-ARC protein|resistance protein, putative, expressed	1.99952
20.1	stress.biotic	loc_os11g37050.1	Transcript	protein|expressed protein	1.76033
20.1	stress.biotic	loc_os10g31770.1	Transcript	nearly identical (1046) AT4G19040 | Symbols: EDR2 | EDR2; lipid binding | chr4:10431799-10437171 REVERSEDUF1336 START START START protein|START domain containing protein, expressed	1.80365
20.1	stress.biotic	loc_os02g39330.1	Transcript	moderately similar to ( 322) AT3G54420 | Symbols: ATEP3, ATCHITIV, CHIV | ATEP3; chitinase | chr3:20145935-20147034 FORWARDmoderately similar to ( 298) CHI4_PHAVU Endochitinase PR4 precursor (EC 3.2.1.14) - Phaseolus vulgaris (Kidney bean) (French bean) chitinase_glyco_hydro_19 Glyco_hydro_19 protein|CHIT1 - Chitinase family protein precursor, expressed	-3.71906
20.1	stress.biotic	loc_os01g28500.1	Transcript	weakly similar to ( 169) AT2G14610 | Symbols: PR1, PR 1, ATPR1 | PR1 (PATHOGENESIS-RELATED GENE 1) | chr2:6241944-6242429 REVERSEmoderately similar to ( 253) PRMS_MAIZE Pathogenesis-related protein PRMS precursor - Zea mays (Maize) SCP SCP SCP protein|SCP-like extracellular protein, expressed	1.53202
20.1	stress.biotic	loc_os01g52304.1	Transcript	NB-ARC protein|NB-ARC domain containing protein, expressed	1.85367
20.1	stress.biotic	loc_os03g46070.1	Transcript	moderately similar to ( 250) AT4G11650 | Symbols: ATOSM34 | ATOSM34 (osmotin 34) | chr4:7025127-7026113 REVERSEmoderately similar to ( 290) ZEAM_MAIZE Zeamatin precursor - Zea mays (Maize)Thaumatin THN protein|thaumatin, putative, expressed	4.64017
20.1	stress.biotic	loc_os01g52270.1	Transcript	NB-ARC protein|NB-ARC domain containing protein, expressed	2.57241
20.1	stress.biotic	loc_os01g14550.1	Transcript	weakly similar to ( 199) AT1G78780 | Symbols: | pathogenesis-related family protein | chr1:29621447-29622431 REVERSEmoderately similar to ( 332) PRPX_HORVU Pathogen-related protein - Hordeum vulgare (Barley) protein|pathogen-related protein, putative, expressed	2.36875
20.1	stress.biotic	loc_os01g64110.1	Transcript	moderately similar to ( 323) AT5G24090 | Symbols: | acidic endochitinase (CHIB1) | chr5:8143805-8145153 REVERSEmoderately similar to ( 333) CHLY_HEVBR Hevamine-A precursor [Includes: Chitinase (EC 3.2.1.14); Lysozyme (EC 3.2.1.17)] - Hevea brasiliensis (Para rubber tree) Glyco_hydro_18 protein|glycosyl hydrolase, putative, expressed	-2.16794
20.1	stress.biotic	loc_os01g53090.1	Transcript	moderately similar to ( 249) AT1G78780 | Symbols: | pathogenesis-related family protein | chr1:29621447-29622431 REVERSEmoderately similar to ( 234) PRPX_HORVU Pathogen-related protein - Hordeum vulgare (Barley) protein|pathogen-related protein, putative, expressed	2.77341
20.1	stress.biotic	loc_os12g17430.1	Transcript	protein|NBS-LRR disease resistance protein, putative, expressed	-4.60534
20.1	stress.biotic	loc_os07g42520.1	Transcript	protein|dirigent, putative, expressed	2.88159
20.1	stress.biotic	loc_os08g41100.1	Transcript	moderately similar to ( 428) AT1G05850 | Symbols: POM1, ERH2, ELP1, CTL1, ELP, HOT2, ATCTL1 | POM1 (POM-POM1); chitinase | chr1:1766833-1768117 REVERSEmoderately similar to ( 207) CHI2_BRANA Endochitinase CH25 precursor (EC 3.2.1.14) - Brassica napus (Rape) chitinase_glyco_hydro_19 Glyco_hydro_19 protein|CHIT12 - Chitinase family protein precursor, expressed	3.49059
20.1	stress.biotic	loc_os06g51050.1	Transcript	moderately similar to ( 367) AT3G12500 | Symbols: ATHCHIB, PR3, PR-3, CHI-B, B-CHI | ATHCHIB (ARABIDOPSIS THALIANA BASIC CHITINASE); chitinase | chr3:3962501-3963945 REVERSEhighly similar to ( 509) CHI1_ORYSA Basic endochitinase 1 precursor (EC 3.2.1.14) - Oryza sativa (Rice) Glyco_hydro_19 chitinase_glyco_hydro_19 protein|CHIT7 - Chitinase family protein precursor, expressed	6.28492
20.1	stress.biotic	loc_os07g30940.1	Transcript	weakly similar to ( 116) AT1G02120 | Symbols: VAD1 | VAD1 (VASCULAR ASSOCIATED DEATH1) | chr1:395761-399720 FORWARD protein|expressed protein	1.90134
20.1	stress.biotic	loc_os05g50500.1	Transcript	very weakly similar to (98.6) AT2G42900 | Symbols: | FUNCTIONS IN: molecular_function unknown; INVOLVED IN: biological_process unknown; LOCATED IN: cellular_component unknown; EXPRESSED IN: 22 plant structures; EXPRESSED DURING: 13 growth stages; CONTAINS InterPro DOMAIN/s: Plant Basic Secretory Protein (InterPro:IPR007541); Has 25 Blast hits to 25 proteins in 11 species: Archae - 0; Bacteria - 0…	-8.06715
20.1	stress.biotic	loc_os03g45960.1	Transcript	moderately similar to ( 239) AT4G11650 | Symbols: ATOSM34 | ATOSM34 (osmotin 34) | chr4:7025127-7026113 REVERSEmoderately similar to ( 280) ZEAM_MAIZE Zeamatin precursor - Zea mays (Maize)Thaumatin THN protein|thaumatin, putative, expressed	2.78612
20.1.1	stress.biotic.respiratory burst	loc_os01g25820.1	Transcript	nearly identical (1028) AT5G47910 | Symbols: RBOHD, ATRBOHD | RBOHD (RESPIRATORY BURST OXIDASE HOMOLOGUE D); NAD(P)H oxidase | chr5:19397585-19401768 FORWARD NAD_binding_6 NADPH_Ox FAD_binding_8 Ferric_reduct protein|respiratory burst oxidase, putative, expressed	5.64338
20.1.1	stress.biotic.respiratory burst	loc_os01g53294.1	Transcript	nearly identical (1174) AT1G64060 | Symbols: ATRBOH F, ATRBOHF, RBOHAP108, RBOHF | ATRBOH F (ARABIDOPSIS THALIANA RESPIRATORY BURST OXIDASE PROTEIN F); NAD(P)H oxidase | chr1:23770266-23776317 FORWARD NAD_binding_6 FAD_binding_8 Ferric_reduct NADPH_Ox protein|respiratory burst oxidase protein B, putative, expressed	-1.69438
20.1.1	stress.biotic.respiratory burst	loc_os09g26660.1	Transcript	highly similar to ( 742) AT1G19230 | Symbols: | respiratory burst oxidase protein E (RbohE) / NADPH oxidase | chr1:6644189-6649149 FORWARD NAD_binding_6 NADPH_Ox FAD_binding_8 protein|ferric reductase, putative, expressed	-4.02728
20.1.1	stress.biotic.respiratory burst	loc_os08g35210.1	Transcript	highly similar to ( 589) AT1G19230 | Symbols: | respiratory burst oxidase protein E (RbohE) / NADPH oxidase | chr1:6644189-6649149 FORWARD NAD_binding_6 NADPH_Ox FAD_binding_8 COG4097 protein|ferric reductase, putative, expressed	2.75755
20.1.3	stress.biotic.signalling	loc_os07g42370.1	Transcript	very weakly similar to (99.0) AT1G19180 | Symbols: TIFY10A | JAZ1 (JASMONATE-ZIM-DOMAIN PROTEIN 1); protein binding | chr1:6622708-6623271 FORWARD protein|zinc-finger protein, putative, expressed	-2.93908
20.1.3	stress.biotic.signalling	loc_os03g28940.1	Transcript	very weakly similar to (93.6) AT1G74950 | Symbols: JAZ2, TIFY10B | TIFY10B | chr1:28148919-28150258 REVERSE protein|ZIM domain containing protein, putative, expressed	-5.17954
20.1.3.1	stress.biotic.signalling.MLO-like	loc_os02g10350.1	Transcript	moderately similar to ( 409) AT4G02600 | Symbols: MLO1, ATMLO1 | MLO1; calmodulin binding | chr4:1144141-1147156 FORWARDmoderately similar to ( 258) MLOH1_ORYSA MLO protein homolog 1 (OsMLO1) - Oryza sativa (Rice)Mlo protein|MLO domain containing protein, putative, expressed	-3.6371
20.1.3.1	stress.biotic.signalling.MLO-like	loc_os02g35490.1	Transcript	weakly similar to ( 122) AT4G02600 | Symbols: MLO1, ATMLO1 | MLO1; calmodulin binding | chr4:1144141-1147156 FORWARDMlo protein|MLO domain containing protein, putative, expressed	3.46584
20.1.5	stress.biotic.regulation of transcription	loc_os05g01020.2	Transcript	nearly identical (1016) AT1G70060 | Symbols: SNL4 | SNL4 (SIN3-LIKE 4) | chr1:26383789-26389568 FORWARD SIN3 HDAC_interact protein|transcriptional repressor, putative, expressed	1.31072
20.1.7	stress.biotic.PR-proteins	loc_os04g55440.1	Transcript	moderately similar to ( 329) AT1G74190 | Symbols: AtRLP15 | AtRLP15 (Receptor Like Protein 15); protein binding | chr1:27902590-27906158 REVERSEweakly similar to ( 181) PSKR_DAUCA Phytosulfokine receptor precursor (EC 2.7.11.1) (Phytosulfokine LRR receptor kinase) - Daucus carota (Carrot) protein|Cf-4A protein, putative, expressed	2.1288
20.1.7	stress.biotic.PR-proteins	loc_os03g46550.1	Transcript	moderately similar to ( 206) AT3G50950 | Symbols: | disease resistance protein (CC-NBS-LRR class), putative | chr3:18936127-18938685 FORWARD NB-ARC protein|RGH1A, putative, expressed	2.52812
20.1.7	stress.biotic.PR-proteins	loc_os06g49360.1	Transcript	weakly similar to ( 154) AT3G14470 | Symbols: | disease resistance protein (NBS-LRR class), putative | chr3:4857940-4861104 FORWARD NB-ARC protein|NBS-LRR disease resistance protein, putative, expressed	3.49777
20.1.7	stress.biotic.PR-proteins	loc_os08g39550.1	Transcript	moderately similar to ( 380) AT3G12610 | Symbols: DRT100 | DRT100 (DNA-DAMAGE REPAIR/TOLERATION 100); nucleotide binding / protein binding | chr3:4006661-4007779 REVERSEweakly similar to ( 135) RPK1_IPONI Receptor-like protein kinase precursor (EC 2.7.11.1) - Ipomoea nil (Japanese morning glory) (Pharbitis nil) protein|polygalacturonase inhibitor 2 precursor, putative, expressed	1.43562
20.1.7	stress.biotic.PR-proteins	loc_os12g37760.1	Transcript	moderately similar to ( 236) AT3G07040 | Symbols: RPM1, RPS3 | RPM1 (RESISTANCE TO P. SYRINGAE PV MACULICOLA 1); nucleotide binding / protein binding | chr3:2226244-2229024 REVERSE NB-ARC protein|RGH1A, putative, expressed	3.04843
20.1.7	stress.biotic.PR-proteins	loc_os09g10054.1	Transcript	moderately similar to ( 306) AT1G12220 | Symbols: RPS5 | RPS5 (RESISTANT TO P. SYRINGAE 5); nucleotide binding | chr1:4145011-4147680 FORWARD NB-ARC protein|disease resistance protein RPS2, putative, expressed	3.73132
20.1.7	stress.biotic.PR-proteins	loc_os12g37770.1	Transcript	moderately similar to ( 233) AT3G07040 | Symbols: RPM1, RPS3 | RPM1 (RESISTANCE TO P. SYRINGAE PV MACULICOLA 1); nucleotide binding / protein binding | chr3:2226244-2229024 REVERSE NB-ARC protein|RGH1A, putative, expressed	3.13123
20.1.7	stress.biotic.PR-proteins	loc_os01g42330.1	Transcript	weakly similar to ( 151) AT3G14470 | Symbols: | disease resistance protein (NBS-LRR class), putative | chr3:4857940-4861104 FORWARD NB-ARC protein|retrotransposon protein, putative, unclassified, expressed	-1.78184
20.1.7	stress.biotic.PR-proteins	loc_os05g31570.1	Transcript	moderately similar to ( 370) AT3G14470 | Symbols: | disease resistance protein (NBS-LRR class), putative | chr3:4857940-4861104 FORWARD NB-ARC protein|disease resistance protein RGA4, putative, expressed	3.53868
20.1.7	stress.biotic.PR-proteins	loc_os01g41890.1	Transcript	weakly similar to ( 191) AT3G46530 | Symbols: RPP13 | RPP13 (RECOGNITION OF PERONOSPORA PARASITICA 13); ATP binding | chr3:17130739-17133246 REVERSE NB-ARC protein|MLA1, putative, expressed	-4.43344
20.1.7	stress.biotic.PR-proteins	loc_os11g39320.1	Transcript	moderately similar to ( 219) AT3G07040 | Symbols: RPM1, RPS3 | RPM1 (RESISTANCE TO P. SYRINGAE PV MACULICOLA 1); nucleotide binding / protein binding | chr3:2226244-2229024 REVERSE NB-ARC protein|LZ-NBS-LRR class, putative, expressed	1.83164
20.1.7	stress.biotic.PR-proteins	loc_os11g35210.1	Transcript	moderately similar to ( 225) AT3G14470 | Symbols: | disease resistance protein (NBS-LRR class), putative | chr3:4857940-4861104 FORWARD NB-ARC protein|NB-ARC domain containing protein, expressed	2.43248
20.1.7	stress.biotic.PR-proteins	loc_os11g29520.1	Transcript	moderately similar to ( 246) AT3G14470 | Symbols: | disease resistance protein (NBS-LRR class), putative | chr3:4857940-4861104 FORWARD NB-ARC protein|NBS-LRR disease resistance protein, putative, expressed	2.48495
20.1.7	stress.biotic.PR-proteins	loc_os11g45924.1	Transcript	weakly similar to ( 134) AT3G46730 | Symbols: | disease resistance protein (CC-NBS class), putative | chr3:17213069-17215612 REVERSE NB-ARC protein|WRKY41, expressed	4.45895
20.1.7	stress.biotic.PR-proteins	loc_os11g37740.1	Transcript	moderately similar to ( 201) AT3G46710 | Symbols: | disease resistance protein (CC-NBS-LRR class), putative | chr3:17206489-17209032 REVERSE NB-ARC protein|stripe rust resistance protein Yr10, putative, expressed	1.89261
20.1.7	stress.biotic.PR-proteins	loc_os03g48370.1	Transcript	moderately similar to ( 264) AT3G14470 | Symbols: | disease resistance protein (NBS-LRR class), putative | chr3:4857940-4861104 FORWARD NB-ARC protein|disease resistance RPP13-like protein 1, putative, expressed	2.85196
20.1.7	stress.biotic.PR-proteins	loc_os05g41310.1	Transcript	moderately similar to ( 394) AT3G14470 | Symbols: | disease resistance protein (NBS-LRR class), putative | chr3:4857940-4861104 FORWARD NB-ARC protein|disease resistance protein RGA2, putative, expressed	1.54841
20.1.7	stress.biotic.PR-proteins	loc_os11g10850.1	Transcript	very weakly similar to (93.2) AT5G42510 | Symbols: | disease resistance-responsive family protein | chr5:16998268-16998816 REVERSEDirigent protein|dirigent, putative, expressed	-11.0458
20.1.7	stress.biotic.PR-proteins	loc_os11g45060.1	Transcript	moderately similar to ( 250) AT3G14470 | Symbols: | disease resistance protein (NBS-LRR class), putative | chr3:4857940-4861104 FORWARD NB-ARC protein|NB-ARC domain containing protein, expressed	4.34923
20.1.7	stress.biotic.PR-proteins	loc_os11g44580.1	Transcript	moderately similar to ( 222) AT3G14460 | Symbols: | disease resistance protein (NBS-LRR class), putative | chr3:4851990-4856264 REVERSE NB-ARC protein|go35 NBS-LRR, putative, expressed	4.01447
20.1.7	stress.biotic.PR-proteins	loc_os12g10870.1	Transcript	moderately similar to ( 379) AT1G47890 | Symbols: AtRLP7 | AtRLP7 (Receptor Like Protein 7); kinase/ protein binding | chr1:17643976-17647035 FORWARDweakly similar to ( 198) RPK1_IPONI Receptor-like protein kinase precursor (EC 2.7.11.1) - Ipomoea nil (Japanese morning glory) (Pharbitis nil) protein|verticillium wilt disease resistance protein, putative, expressed	5.72062
20.1.7	stress.biotic.PR-proteins	loc_os01g25740.1	Transcript	moderately similar to ( 361) AT3G14460 | Symbols: | disease resistance protein (NBS-LRR class), putative | chr3:4851990-4856264 REVERSE NB-ARC protein|powdery mildew resistance protein PM3F, putative, expressed	4.14927
20.1.7	stress.biotic.PR-proteins	loc_os06g47800.1	Transcript	moderately similar to ( 259) AT3G14470 | Symbols: | disease resistance protein (NBS-LRR class), putative | chr3:4857940-4861104 FORWARD NB-ARC protein|disease resistance protein RGA3, putative, expressed	4.69996
20.1.7	stress.biotic.PR-proteins	loc_os01g57340.1	Transcript	moderately similar to ( 328) AT3G14460 | Symbols: | disease resistance protein (NBS-LRR class), putative | chr3:4851990-4856264 REVERSE NB-ARC protein|rp1, putative, expressed	1.23218
20.1.7	stress.biotic.PR-proteins	loc_os05g40160.1	Transcript	weakly similar to ( 144) AT3G07040 | Symbols: RPM1, RPS3 | RPM1 (RESISTANCE TO P. SYRINGAE PV MACULICOLA 1); nucleotide binding / protein binding | chr3:2226244-2229024 REVERSE NB-ARC protein|NB-ARC domain containing protein, expressed	2.50202
20.1.7	stress.biotic.PR-proteins	loc_os04g52970.1	Transcript	moderately similar to ( 221) AT3G14470 | Symbols: | disease resistance protein (NBS-LRR class), putative | chr3:4857940-4861104 FORWARD NB-ARC protein|NBS-LRR disease resistance protein, putative, expressed	1.43015
20.1.7	stress.biotic.PR-proteins	loc_os03g11340.1	Transcript	moderately similar to ( 496) AT5G61240 | Symbols: | protein binding | chr5:24629485-24631958 FORWARDweakly similar to ( 125) RPK1_IPONI Receptor-like protein kinase precursor (EC 2.7.11.1) - Ipomoea nil (Japanese morning glory) (Pharbitis nil) protein|leucine-rich repeat resistance protein, putative, expressed	2.91206
20.1.7	stress.biotic.PR-proteins	loc_os11g17014.1	Transcript	weakly similar to ( 194) AT3G46710 | Symbols: | disease resistance protein (CC-NBS-LRR class), putative | chr3:17206489-17209032 REVERSE NB-ARC protein|NB-ARC domain containing protein, expressed	1.78379
20.1.7	stress.biotic.PR-proteins	loc_os06g06380.1	Transcript	moderately similar to ( 360) AT3G07040 | Symbols: RPM1, RPS3 | RPM1 (RESISTANCE TO P. SYRINGAE PV MACULICOLA 1); nucleotide binding / protein binding | chr3:2226244-2229024 REVERSE NB-ARC protein|NBS-LRR type disease resistance protein, putative, expressed	1.97151
20.1.7	stress.biotic.PR-proteins	loc_os07g29810.1	Transcript	moderately similar to ( 283) AT3G14470 | Symbols: | disease resistance protein (NBS-LRR class), putative | chr3:4857940-4861104 FORWARD NB-ARC protein|disease resistant protein, identical, putative, expressed	2.57326
20.1.7	stress.biotic.PR-proteins	loc_os03g10900.1	Transcript	moderately similar to ( 294) AT1G12220 | Symbols: RPS5 | RPS5 (RESISTANT TO P. SYRINGAE 5); nucleotide binding | chr1:4145011-4147680 FORWARD NB-ARC protein|disease resistance protein, putative, expressed	2.67412
20.1.7	stress.biotic.PR-proteins	loc_os11g45930.1	Transcript	weakly similar to ( 110) AT1G58807 | Symbols: | disease resistance protein (CC-NBS-LRR class), putative / PRM1 homolog, putative | chr1:21780574-21783395 FORWARD NB-ARC protein|NBS-LRR type disease resistance protein, putative, expressed	2.97527
20.1.7	stress.biotic.PR-proteins	loc_os10g04342.1	Transcript	very weakly similar to (82.4) AT5G48620 | Symbols: | disease resistance protein (CC-NBS-LRR class), putative | chr5:19717406-19720932 FORWARD protein|stripe rust resistance protein Yr10, putative, expressed	2.33044
20.1.7	stress.biotic.PR-proteins	loc_os01g06900.1	Transcript	moderately similar to ( 325) AT1G47890 | Symbols: AtRLP7 | AtRLP7 (Receptor Like Protein 7); kinase/ protein binding | chr1:17643976-17647035 FORWARDweakly similar to ( 169) RPK1_IPONI Receptor-like protein kinase precursor (EC 2.7.11.1) - Ipomoea nil (Japanese morning glory) (Pharbitis nil) protein|verticillium wilt disease resistance protein Ve2, putative, expressed	1.88705
20.1.7	stress.biotic.PR-proteins	loc_os08g10430.1	Transcript	moderately similar to ( 204) AT3G46530 | Symbols: RPP13 | RPP13 (RECOGNITION OF PERONOSPORA PARASITICA 13); ATP binding | chr3:17130739-17133246 REVERSE NB-ARC protein|NBS-LRR disease resistance protein, putative, expressed	1.25106
20.1.7	stress.biotic.PR-proteins	loc_os01g23380.1	Transcript	moderately similar to ( 238) AT3G07040 | Symbols: RPM1, RPS3 | RPM1 (RESISTANCE TO P. SYRINGAE PV MACULICOLA 1); nucleotide binding / protein binding | chr3:2226244-2229024 REVERSE NB-ARC protein|stripe rust resistance protein Yr10, putative, expressed	2.73197
20.1.7	stress.biotic.PR-proteins	loc_os11g45180.1	Transcript	moderately similar to ( 336) AT3G14470 | Symbols: | disease resistance protein (NBS-LRR class), putative | chr3:4857940-4861104 FORWARD NB-ARC protein|NBS-LRR disease resistance protein, putative, expressed	2.16945
20.1.7	stress.biotic.PR-proteins	loc_os11g35850.1	Transcript	moderately similar to ( 323) AT2G34930 | Symbols: | disease resistance family protein | chr2:14737169-14739886 REVERSEweakly similar to ( 150) RPK1_IPONI Receptor-like protein kinase precursor (EC 2.7.11.1) - Ipomoea nil (Japanese morning glory) (Pharbitis nil) protein|expressed protein	4.15152
20.1.7	stress.biotic.PR-proteins	loc_os08g31780.1	Transcript	moderately similar to ( 245) AT3G07040 | Symbols: RPM1, RPS3 | RPM1 (RESISTANCE TO P. SYRINGAE PV MACULICOLA 1); nucleotide binding / protein binding | chr3:2226244-2229024 REVERSE NB-ARC protein|MLA1, putative, expressed	1.26079
20.1.7	stress.biotic.PR-proteins	loc_os03g63200.1	Transcript	moderately similar to ( 321) AT3G14460 | Symbols: | disease resistance protein (NBS-LRR class), putative | chr3:4851990-4856264 REVERSE NB-ARC protein|powdery mildew resistance protein PM3b, putative, expressed	4.99363
20.1.7	stress.biotic.PR-proteins	loc_os12g29290.1	Transcript	moderately similar to ( 259) AT3G14470 | Symbols: | disease resistance protein (NBS-LRR class), putative | chr3:4857940-4861104 FORWARD NB-ARC protein|disease resistance protein RGA3, putative, expressed	8.05053
20.1.7	stress.biotic.PR-proteins	loc_os11g39160.1	Transcript	moderately similar to ( 222) AT3G07040 | Symbols: RPM1, RPS3 | RPM1 (RESISTANCE TO P. SYRINGAE PV MACULICOLA 1); nucleotide binding / protein binding | chr3:2226244-2229024 REVERSE NB-ARC protein|NBS-LRR disease resistance protein, putative, expressed	4.70579
20.1.7	stress.biotic.PR-proteins	loc_os12g10180.1	Transcript	moderately similar to ( 265) AT3G14470 | Symbols: | disease resistance protein (NBS-LRR class), putative | chr3:4857940-4861104 FORWARD NB-ARC protein|NBS-LRR type disease resistance protein Rps1-k-2, putative, expressed	1.47525
20.1.7	stress.biotic.PR-proteins	loc_os06g06400.1	Transcript	moderately similar to ( 349) AT3G07040 | Symbols: RPM1, RPS3 | RPM1 (RESISTANCE TO P. SYRINGAE PV MACULICOLA 1); nucleotide binding / protein binding | chr3:2226244-2229024 REVERSE NB-ARC protein|NBS-LRR type disease resistance protein, putative, expressed	3.69996
20.1.7	stress.biotic.PR-proteins	loc_os07g08890.1	Transcript	moderately similar to ( 414) AT3G07040 | Symbols: RPM1, RPS3 | RPM1 (RESISTANCE TO P. SYRINGAE PV MACULICOLA 1); nucleotide binding / protein binding | chr3:2226244-2229024 REVERSE NB-ARC protein|disease resistance protein RPM1, putative, expressed	4.16945
20.1.7	stress.biotic.PR-proteins	loc_os09g19280.1	Transcript	weakly similar to ( 166) AT3G07040 | Symbols: RPM1, RPS3 | RPM1 (RESISTANCE TO P. SYRINGAE PV MACULICOLA 1); nucleotide binding / protein binding | chr3:2226244-2229024 REVERSE NB-ARC DUF1263 protein|retrotransposon protein, putative, unclassified, expressed	1.99952
20.1.7	stress.biotic.PR-proteins	loc_os08g43010.1	Transcript	moderately similar to ( 408) AT3G14470 | Symbols: | disease resistance protein (NBS-LRR class), putative | chr3:4857940-4861104 FORWARD NB-ARC protein|disease resistance RPP13-like protein 1, putative, expressed	3.87867
20.1.7	stress.biotic.PR-proteins	loc_os11g45190.1	Transcript	moderately similar to ( 267) AT3G14470 | Symbols: | disease resistance protein (NBS-LRR class), putative | chr3:4857940-4861104 FORWARD NB-ARC protein|NB-ARC domain containing protein, expressed	4.09037
20.1.7	stress.biotic.PR-proteins	loc_os01g06876.1	Transcript	weakly similar to ( 113) AT5G40170 | Symbols: AtRLP54 | AtRLP54 (Receptor Like Protein 54); kinase/ protein binding | chr5:16065179-16067557 REVERSE protein|Cf-2, putative, expressed	-8.10508
20.1.7	stress.biotic.PR-proteins	loc_os03g40194.1	Transcript	moderately similar to ( 315) AT3G14470 | Symbols: | disease resistance protein (NBS-LRR class), putative | chr3:4857940-4861104 FORWARD NB-ARC protein|disease resistance RPP13-like protein 1, putative, expressed	4.08698
20.1.7	stress.biotic.PR-proteins	loc_os11g10760.1	Transcript	weakly similar to ( 137) AT1G69545 | Symbols: | leucine-rich repeat family protein | chr1:26148836-26150947 REVERSE protein|NBS-LRR disease resistance protein, putative, expressed	-5.29558
20.1.7	stress.biotic.PR-proteins	loc_os04g43340.1	Transcript	moderately similar to ( 409) AT3G14470 | Symbols: | disease resistance protein (NBS-LRR class), putative | chr3:4857940-4861104 FORWARD NB-ARC protein|disease resistance RPP13-like protein 1, putative, expressed	1.84752
20.1.7	stress.biotic.PR-proteins	loc_os11g45840.1	Transcript	weakly similar to ( 122) AT3G46710 | Symbols: | disease resistance protein (CC-NBS-LRR class), putative | chr3:17206489-17209032 REVERSE NB-ARC protein|expressed protein	2.56387
20.1.7	stress.biotic.PR-proteins	loc_os01g71106.2	Transcript	moderately similar to ( 219) AT1G69545 | Symbols: | leucine-rich repeat family protein | chr1:26148836-26150947 REVERSE protein|NBS-LRR disease resistance protein, putative, expressed	1.88849
20.1.7	stress.biotic.PR-proteins	loc_os09g14410.1	Transcript	moderately similar to ( 259) AT3G14470 | Symbols: | disease resistance protein (NBS-LRR class), putative | chr3:4857940-4861104 FORWARD NB-ARC protein|expressed protein	2.40924
20.1.7	stress.biotic.PR-proteins	loc_os12g36720.1	Transcript	weakly similar to ( 200) AT3G07040 | Symbols: RPM1, RPS3 | RPM1 (RESISTANCE TO P. SYRINGAE PV MACULICOLA 1); nucleotide binding / protein binding | chr3:2226244-2229024 REVERSE NB-ARC protein|RGH1A, putative, expressed	3.92737
20.1.7	stress.biotic.PR-proteins	loc_os02g04530.1	Transcript	moderately similar to ( 230) AT3G14460 | Symbols: | disease resistance protein (NBS-LRR class), putative | chr3:4851990-4856264 REVERSE NB-ARC protein|rust resistance-like protein RP1, putative, expressed	-6.37508
20.1.7	stress.biotic.PR-proteins	loc_os11g11790.1	Transcript	weakly similar to ( 108) AT3G07040 | Symbols: RPM1, RPS3 | RPM1 (RESISTANCE TO P. SYRINGAE PV MACULICOLA 1); nucleotide binding / protein binding | chr3:2226244-2229024 REVERSE protein|NBS-LRR type disease resistance protein, putative, expressed	1.70299
20.1.7	stress.biotic.PR-proteins	loc_os07g40810.1	Transcript	moderately similar to ( 291) AT3G07040 | Symbols: RPM1, RPS3 | RPM1 (RESISTANCE TO P. SYRINGAE PV MACULICOLA 1); nucleotide binding / protein binding | chr3:2226244-2229024 REVERSE NB-ARC protein|NBS-LRR type disease resistance protein, putative, expressed	7.47634
20.1.7	stress.biotic.PR-proteins	loc_os07g01660.1	Transcript	weakly similar to ( 110) AT5G42510 | Symbols: | disease resistance-responsive family protein | chr5:16998268-16998816 REVERSEDirigent protein|dirigent, putative, expressed	-2.21253
20.1.7	stress.biotic.PR-proteins	loc_os01g71114.1	Transcript	weakly similar to ( 180) AT3G14470 | Symbols: | disease resistance protein (NBS-LRR class), putative | chr3:4857940-4861104 FORWARD NB-ARC protein|disease resistance protein RGA4, putative, expressed	2.48495
20.1.7	stress.biotic.PR-proteins	loc_os12g12130.1	Transcript	moderately similar to ( 366) AT1G47890 | Symbols: AtRLP7 | AtRLP7 (Receptor Like Protein 7); kinase/ protein binding | chr1:17643976-17647035 FORWARDweakly similar to ( 180) RPK1_IPONI Receptor-like protein kinase precursor (EC 2.7.11.1) - Ipomoea nil (Japanese morning glory) (Pharbitis nil) protein|verticillium wilt disease resistance protein, putative, expressed	3.67195
20.1.7	stress.biotic.PR-proteins	loc_os08g42700.1	Transcript	moderately similar to ( 254) AT3G07040 | Symbols: RPM1, RPS3 | RPM1 (RESISTANCE TO P. SYRINGAE PV MACULICOLA 1); nucleotide binding / protein binding | chr3:2226244-2229024 REVERSE NB-ARC protein|resistance protein, putative, expressed	2.98806
20.1.7	stress.biotic.PR-proteins	loc_os09g20030.1	Transcript	moderately similar to ( 205) AT3G14470 | Symbols: | disease resistance protein (NBS-LRR class), putative | chr3:4857940-4861104 FORWARD NB-ARC protein|disease resistance RPP13-like protein 1, putative, expressed	1.3321
20.1.7	stress.biotic.PR-proteins	loc_os11g35450.1	Transcript	moderately similar to ( 367) AT2G34930 | Symbols: | disease resistance family protein | chr2:14737169-14739886 REVERSEweakly similar to ( 181) RPK1_IPONI Receptor-like protein kinase precursor (EC 2.7.11.1) - Ipomoea nil (Japanese morning glory) (Pharbitis nil) protein|leucine-rich repeat receptor protein kinase EXS precursor, putative, expressed	5.99952
20.1.7	stress.biotic.PR-proteins	loc_os06g41660.1	Transcript	moderately similar to ( 286) AT3G14460 | Symbols: | disease resistance protein (NBS-LRR class), putative | chr3:4851990-4856264 REVERSE NB-ARC protein|CC-NBS-LRR protein, putative, expressed	1.28903
20.1.7	stress.biotic.PR-proteins	loc_os07g33720.1	Transcript	moderately similar to ( 300) AT3G14470 | Symbols: | disease resistance protein (NBS-LRR class), putative | chr3:4857940-4861104 FORWARD NB-ARC protein|disease resistance protein, putative, expressed	2.19217
20.1.7	stress.biotic.PR-proteins	loc_os10g07534.1	Transcript	moderately similar to ( 353) AT3G07040 | Symbols: RPM1, RPS3 | RPM1 (RESISTANCE TO P. SYRINGAE PV MACULICOLA 1); nucleotide binding / protein binding | chr3:2226244-2229024 REVERSE NB-ARC protein|disease resistance protein RPM1, putative, expressed	2.50202
20.1.7	stress.biotic.PR-proteins	loc_os01g41930.1	Transcript	moderately similar to ( 268) AT2G34930 | Symbols: | disease resistance family protein | chr2:14737169-14739886 REVERSEweakly similar to ( 118) RPK1_IPONI Receptor-like protein kinase precursor (EC 2.7.11.1) - Ipomoea nil (Japanese morning glory) (Pharbitis nil) protein|leucine rich repeat protein, putative, expressed	1.39184
20.1.7	stress.biotic.PR-proteins	loc_os02g39100.1	Transcript	moderately similar to ( 370) AT1G65380 | Symbols: CLV2, AtRLP10 | CLV2 (clavata 2); protein binding / receptor signaling protein | chr1:24286943-24289105 FORWARDweakly similar to ( 167) PSKR_DAUCA Phytosulfokine receptor precursor (EC 2.7.11.1) (Phytosulfokine LRR receptor kinase) - Daucus carota (Carrot) protein|fasciated ear2, putative, expressed	2.20115
20.1.7	stress.biotic.PR-proteins	loc_os10g33140.1	Transcript	weakly similar to ( 163) AT2G34930 | Symbols: | disease resistance family protein | chr2:14737169-14739886 REVERSEweakly similar to ( 107) PSKR_DAUCA Phytosulfokine receptor precursor (EC 2.7.11.1) (Phytosulfokine LRR receptor kinase) - Daucus carota (Carrot) protein|hcrVf2 protein, putative, expressed	1.78072
20.1.7	stress.biotic.PR-proteins	loc_os11g45790.1	Transcript	weakly similar to ( 149) AT3G07040 | Symbols: RPM1, RPS3 | RPM1 (RESISTANCE TO P. SYRINGAE PV MACULICOLA 1); nucleotide binding / protein binding | chr3:2226244-2229024 REVERSE NB-ARC protein|NB-ARC domain containing protein, expressed	3.07847
20.1.7	stress.biotic.PR-proteins	loc_os01g06836.1	Transcript	moderately similar to ( 203) AT4G13810 | Symbols: AtRLP47 | AtRLP47 (Receptor Like Protein 47); protein binding | chr4:8005062-8007287 REVERSEweakly similar to ( 105) RPK1_IPONI Receptor-like protein kinase precursor (EC 2.7.11.1) - Ipomoea nil (Japanese morning glory) (Pharbitis nil) protein|disease resistance protein SlVe2 precursor, putative, expressed	-8.11074
20.1.7	stress.biotic.PR-proteins	loc_os02g16060.1	Transcript	moderately similar to ( 237) AT3G14470 | Symbols: | disease resistance protein (NBS-LRR class), putative | chr3:4857940-4861104 FORWARD NB-ARC protein|RGA-1, putative, expressed	5.64338
20.1.7	stress.biotic.PR-proteins	loc_os06g04830.1	Transcript	moderately similar to ( 453) AT2G34930 | Symbols: | disease resistance family protein | chr2:14737169-14739886 REVERSEmoderately similar to ( 236) RPK1_IPONI Receptor-like protein kinase precursor (EC 2.7.11.1) - Ipomoea nil (Japanese morning glory) (Pharbitis nil) protein|leucine rich repeat protein, putative, expressed	2.55411
20.1.7	stress.biotic.PR-proteins	loc_os09g14450.1	Transcript	moderately similar to ( 211) AT3G14470 | Symbols: | disease resistance protein (NBS-LRR class), putative | chr3:4857940-4861104 FORWARD NB-ARC protein|pollen signalling protein with adenylyl cyclase activity, putative, expressed	3.28492
20.1.7	stress.biotic.PR-proteins	loc_os11g30210.1	Transcript	moderately similar to ( 264) AT3G14470 | Symbols: | disease resistance protein (NBS-LRR class), putative | chr3:4857940-4861104 FORWARD NB-ARC protein|NBS-LRR type disease resistance protein, putative, expressed	9.41387
20.1.7	stress.biotic.PR-proteins	loc_os12g32670.1	Transcript	weakly similar to ( 151) AT3G14470 | Symbols: | disease resistance protein (NBS-LRR class), putative | chr3:4857940-4861104 FORWARD NB-ARC protein|CC-NBS-LRR resistance protein, putative, expressed	2.06991
20.1.7	stress.biotic.PR-proteins	loc_os10g36270.1	Transcript	moderately similar to ( 211) AT3G14470 | Symbols: | disease resistance protein (NBS-LRR class), putative | chr3:4857940-4861104 FORWARD protein|disease resistance RPP13-like protein 1, putative, expressed	2.44698
20.1.7.6.1	stress.biotic.PR-proteins.proteinase inhibitors.trypsin inhibitor	loc_os07g42280.1	Transcript	highly similar to ( 694) AT1G19110 | Symbols: | inter-alpha-trypsin inhibitor heavy chain-related | chr1:6602270-6605766 FORWARDvWA_interalpha_trypsin_inhibitor vWFA protein|von Willebrand factor type A domain containing protein, expressed	-4.12077
20.2	stress.abiotic	loc_os02g36570.1	Transcript	nearly identical (1028) AT5G64940 | Symbols: ATATH13, ATH13 | ATATH13; transporter | chr5:25949116-25953326 FORWARD AarF ubiB ABC1 protein|ABC1 family domain containing protein, putative, expressed	-4.84114
20.2	stress.abiotic	loc_os04g53490.1	Transcript	moderately similar to ( 382) AT3G47860 | Symbols: | apolipoprotein D-related | chr3:17656778-17658269 REVERSE protein|OsCHL Chloroplastic lipocalin, expressed	-3.88801
20.2	stress.abiotic	loc_os09g35630.1	Transcript	moderately similar to ( 237) AT5G52060 | Symbols: ATBAG1 | ATBAG1 (ARABIDOPSIS THALIANA BCL-2-ASSOCIATED ATHANOGENE 1); protein binding | chr5:21152449-21153741 REVERSE BAG1_N protein|BAG domain-containing protein, putative, expressed	-4.83142
20.2	stress.abiotic	loc_os02g10990.1	Transcript	highly similar to ( 708) AT3G15620 | Symbols: UVR3 | UVR3 (UV REPAIR DEFECTIVE 3); DNA (6-4) photolyase | chr3:5294201-5296548 REVERSEweakly similar to ( 133) PHR1_SINAL Deoxyribodipyrimidine photo-lyase (EC 4.1.99.3) (DNA photolyase) (Photoreactivating enzyme) - Sinapis alba (White mustard) (Brassica hirta) FAD_binding_7 PhrB PRK10674 DNA_photolyase protein|FAD binding domain of DNA photolyase d…	-2.34443
20.2	stress.abiotic	loc_os06g03640.1	Transcript	weakly similar to ( 190) AT5G52060 | Symbols: ATBAG1 | ATBAG1 (ARABIDOPSIS THALIANA BCL-2-ASSOCIATED ATHANOGENE 1); protein binding | chr5:21152449-21153741 REVERSE BAG1_N protein|BAG domain containing protein, expressed	-4.43788
20.2	stress.abiotic	loc_os02g10780.1	Transcript	moderately similar to ( 213) AT5G20150 | Symbols: ATSPX1, SPX1 | SPX1 (SPX DOMAIN GENE 1) | chr5:6802429-6803367 FORWARD SPX protein|SPX domain containing protein, putative, expressed	1.87399
20.2	stress.abiotic	loc_os03g61200.1	Transcript	moderately similar to ( 278) AT5G15330 | Symbols: ATSPX4, SPX4 | SPX4 (SPX DOMAIN GENE 4) | chr5:4980595-4982043 FORWARD SPX protein|expressed protein	4.32145
20.2.1	stress.abiotic.heat	loc_os09g30412.1	Transcript	nearly identical (1062) AT5G56030 | Symbols: HSP81-2, ERD8, HSP90.2 | HSP81-2 (HEAT SHOCK PROTEIN 81-2); ATP binding | chr5:22686923-22689433 FORWARDnearly identical (1157) HSP83_ORYSA Heat shock protein 81-3 (HSP81-3) (Gravity-specific protein GSC 381) - Oryza sativa (Rice) HSP90 PRK05218 HtpG protein|heat shock protein, putative, expressed	1.59059
20.2.1	stress.abiotic.heat	loc_os12g07060.1	Transcript	moderately similar to ( 404) AT5G48030 | Symbols: GFA2 | GFA2 (GAMETOPHYTIC FACTOR 2); heat shock protein binding / unfolded protein binding | chr5:19466298-19469753 REVERSEweakly similar to ( 122) DNJH_CUCSA DnaJ protein homolog (DNAJ-1) - Cucumis sativus (Cucumber) DnaJ PRK10767 DnaJ_C PRK10266 DnaJ DnaJ_CXXCXGXG DnaJ CbpA protein|chaperone protein dnaJ, putative, expressed	3.0935
20.2.1	stress.abiotic.heat	loc_os06g02170.1	Transcript	weakly similar to ( 179) AT2G35540 | Symbols: | DNAJ heat shock N-terminal domain-containing protein | chr2:14927158-14928930 FORWARD protein|DNAJ heat shock N-terminal domain-containing protein, putative, expressed	2.23656
20.2.1	stress.abiotic.heat	loc_os09g30418.1	Transcript	nearly identical (1079) AT5G56030 | Symbols: HSP81-2, ERD8, HSP90.2 | HSP81-2 (HEAT SHOCK PROTEIN 81-2); ATP binding | chr5:22686923-22689433 FORWARDnearly identical (1179) HSP83_ORYSA Heat shock protein 81-3 (HSP81-3) (Gravity-specific protein GSC 381) - Oryza sativa (Rice) HSP90 PRK05218 HtpG protein|heat shock protein, putative, expressed	1.75115
20.2.1	stress.abiotic.heat	loc_os03g57340.1	Transcript	highly similar to ( 541) AT3G44110 | Symbols: ATJ3, ATJ | ATJ3; protein binding | chr3:15869179-15871059 REVERSEhighly similar to ( 577) DNJH_CUCSA DnaJ protein homolog (DNAJ-1) - Cucumis sativus (Cucumber) DnaJ PRK10767 DnaJ_CXXCXGXG DnaJ DnaJ PRK10266 protein|chaperone protein dnaJ, putative, expressed	-3.21096
20.2.1	stress.abiotic.heat	loc_os03g19200.1	Transcript	moderately similar to ( 377) AT4G02100 | Symbols: | DNAJ heat shock N-terminal domain-containing protein | chr4:930228-932049 FORWARD protein|DNAJ heat shock N-terminal domain-containing protein, putative, expressed	-2.47355
20.2.1	stress.abiotic.heat	loc_os07g09450.1	Transcript	weakly similar to ( 152) AT2G35795 | Symbols: | DNAJ heat shock N-terminal domain-containing protein | chr2:15042321-15043334 FORWARD protein|heat shock protein DnaJ, putative, expressed	1.94142
20.2.1	stress.abiotic.heat	loc_os12g41820.1	Transcript	moderately similar to ( 428) AT1G16680 | Symbols: | DNAJ heat shock N-terminal domain-containing protein / S-locus protein, putative | chr1:5702813-5705537 FORWARD DnaJ protein|heat shock protein DnaJ, putative, expressed	1.17786
20.2.1	stress.abiotic.heat	loc_os02g03600.1	Transcript	moderately similar to ( 305) AT5G25530 | Symbols: | DNAJ heat shock protein, putative | chr5:8889665-8890954 REVERSEvery weakly similar to (86.3) DNJH_CUCSA DnaJ protein homolog (DNAJ-1) - Cucumis sativus (Cucumber) DnaJ DnaJ DnaJ PRK10767 DnaJ_C CbpA protein|dnaJ domain containing protein, expressed	1.71573
[truncated: 6,442 more rows]
